# Supplementary material for: Somatic and germline mutational processes across the tree of life
Source: Research Square preprint supplement (doi:10.21203/rs.3.rs-8406555/v1), 2026-01-19
Supplement: Supplementary file 1 [file 5b07554d5bd121b368da0f5a.xlsx]

## Sheet: Table 1
Supplementary Table 1. Homo sapiens positive control and negative control samples
	BC-1	HT-115	PD47269d	PD48473b
Genomic DNA source	B-cell lymphoma cell line	Colorectal cancer cell line	Normal blood granulocytes	Normal blood granulocytes
Age (years)	-	-	0	82
Gender	M	-	F	F
Read count	5962252	5933281	12156251	4949180
Read length	18,571 ± 3,890	17,038 ± 3,627	16,523 ± 3,762	18,263 ± 1,753
Read depth	36.9	33.7	67	30.2
Mutational process	APOBEC	POLE	Clock-like	Clock-like
Mutational signature	SBS2	SBS10a, SBS10b and SBS28	SBS1 and SBS5	SBS1 and SBS5

## Sheet: Table 2
Supplementary Table 2. Gold-standard sample SBS96 counts
Substitution	Trinucleotide	SBS96	Count	Sample
C>A	ACA	A[C>A]A	8	BC-1_1E20_2K2
C>A	ACC	A[C>A]C	6	BC-1_1E20_2K2
C>A	ACG	A[C>A]G	0	BC-1_1E20_2K2
C>A	ACT	A[C>A]T	3	BC-1_1E20_2K2
C>G	ACA	A[C>G]A	2	BC-1_1E20_2K2
C>G	ACC	A[C>G]C	3	BC-1_1E20_2K2
C>G	ACG	A[C>G]G	0	BC-1_1E20_2K2
C>G	ACT	A[C>G]T	1	BC-1_1E20_2K2
C>T	ACA	A[C>T]A	41	BC-1_1E20_2K2
C>T	ACC	A[C>T]C	15	BC-1_1E20_2K2
C>T	ACG	A[C>T]G	3	BC-1_1E20_2K2
C>T	ACT	A[C>T]T	15	BC-1_1E20_2K2
T>A	ATA	A[T>A]A	3	BC-1_1E20_2K2
T>A	ATC	A[T>A]C	2	BC-1_1E20_2K2
T>A	ATG	A[T>A]G	3	BC-1_1E20_2K2
T>A	ATT	A[T>A]T	7	BC-1_1E20_2K2
T>C	ATA	A[T>C]A	12	BC-1_1E20_2K2
T>C	ATC	A[T>C]C	6	BC-1_1E20_2K2
T>C	ATG	A[T>C]G	4	BC-1_1E20_2K2
T>C	ATT	A[T>C]T	4	BC-1_1E20_2K2
T>G	ATA	A[T>G]A	1	BC-1_1E20_2K2
T>G	ATC	A[T>G]C	0	BC-1_1E20_2K2
T>G	ATG	A[T>G]G	1	BC-1_1E20_2K2
T>G	ATT	A[T>G]T	0	BC-1_1E20_2K2
C>A	CCA	C[C>A]A	9	BC-1_1E20_2K2
C>A	CCC	C[C>A]C	2	BC-1_1E20_2K2
C>A	CCG	C[C>A]G	1	BC-1_1E20_2K2
C>A	CCT	C[C>A]T	8	BC-1_1E20_2K2
C>G	CCA	C[C>G]A	3	BC-1_1E20_2K2
C>G	CCC	C[C>G]C	5	BC-1_1E20_2K2
C>G	CCG	C[C>G]G	0	BC-1_1E20_2K2
C>G	CCT	C[C>G]T	2	BC-1_1E20_2K2
C>T	CCA	C[C>T]A	79	BC-1_1E20_2K2
C>T	CCC	C[C>T]C	18	BC-1_1E20_2K2
C>T	CCG	C[C>T]G	14	BC-1_1E20_2K2
C>T	CCT	C[C>T]T	30	BC-1_1E20_2K2
T>A	CTA	C[T>A]A	2	BC-1_1E20_2K2
T>A	CTC	C[T>A]C	1	BC-1_1E20_2K2
T>A	CTG	C[T>A]G	2	BC-1_1E20_2K2
T>A	CTT	C[T>A]T	1	BC-1_1E20_2K2
T>C	CTA	C[T>C]A	1	BC-1_1E20_2K2
T>C	CTC	C[T>C]C	2	BC-1_1E20_2K2
T>C	CTG	C[T>C]G	6	BC-1_1E20_2K2
T>C	CTT	C[T>C]T	2	BC-1_1E20_2K2
T>G	CTA	C[T>G]A	1	BC-1_1E20_2K2
T>G	CTC	C[T>G]C	2	BC-1_1E20_2K2
T>G	CTG	C[T>G]G	2	BC-1_1E20_2K2
T>G	CTT	C[T>G]T	4	BC-1_1E20_2K2
C>A	GCA	G[C>A]A	21	BC-1_1E20_2K2
C>A	GCC	G[C>A]C	3	BC-1_1E20_2K2
C>A	GCG	G[C>A]G	0	BC-1_1E20_2K2
C>A	GCT	G[C>A]T	5	BC-1_1E20_2K2
C>G	GCA	G[C>G]A	3	BC-1_1E20_2K2
C>G	GCC	G[C>G]C	1	BC-1_1E20_2K2
C>G	GCG	G[C>G]G	2	BC-1_1E20_2K2
C>G	GCT	G[C>G]T	4	BC-1_1E20_2K2
C>T	GCA	G[C>T]A	35	BC-1_1E20_2K2
C>T	GCC	G[C>T]C	17	BC-1_1E20_2K2
C>T	GCG	G[C>T]G	4	BC-1_1E20_2K2
C>T	GCT	G[C>T]T	18	BC-1_1E20_2K2
T>A	GTA	G[T>A]A	1	BC-1_1E20_2K2
T>A	GTC	G[T>A]C	1	BC-1_1E20_2K2
T>A	GTG	G[T>A]G	2	BC-1_1E20_2K2
T>A	GTT	G[T>A]T	1	BC-1_1E20_2K2
T>C	GTA	G[T>C]A	3	BC-1_1E20_2K2
T>C	GTC	G[T>C]C	3	BC-1_1E20_2K2
T>C	GTG	G[T>C]G	1	BC-1_1E20_2K2
T>C	GTT	G[T>C]T	2	BC-1_1E20_2K2
T>G	GTA	G[T>G]A	1	BC-1_1E20_2K2
T>G	GTC	G[T>G]C	0	BC-1_1E20_2K2
T>G	GTG	G[T>G]G	1	BC-1_1E20_2K2
T>G	GTT	G[T>G]T	2	BC-1_1E20_2K2
C>A	TCA	T[C>A]A	8	BC-1_1E20_2K2
C>A	TCC	T[C>A]C	5	BC-1_1E20_2K2
C>A	TCG	T[C>A]G	2	BC-1_1E20_2K2
C>A	TCT	T[C>A]T	17	BC-1_1E20_2K2
C>G	TCA	T[C>G]A	1	BC-1_1E20_2K2
C>G	TCC	T[C>G]C	2	BC-1_1E20_2K2
C>G	TCG	T[C>G]G	0	BC-1_1E20_2K2
C>G	TCT	T[C>G]T	5	BC-1_1E20_2K2
C>T	TCA	T[C>T]A	1565	BC-1_1E20_2K2
C>T	TCC	T[C>T]C	293	BC-1_1E20_2K2
C>T	TCG	T[C>T]G	149	BC-1_1E20_2K2
C>T	TCT	T[C>T]T	729	BC-1_1E20_2K2
T>A	TTA	T[T>A]A	12	BC-1_1E20_2K2
T>A	TTC	T[T>A]C	3	BC-1_1E20_2K2
T>A	TTG	T[T>A]G	1	BC-1_1E20_2K2
T>A	TTT	T[T>A]T	6	BC-1_1E20_2K2
T>C	TTA	T[T>C]A	7	BC-1_1E20_2K2
T>C	TTC	T[T>C]C	3	BC-1_1E20_2K2
T>C	TTG	T[T>C]G	3	BC-1_1E20_2K2
T>C	TTT	T[T>C]T	5	BC-1_1E20_2K2
T>G	TTA	T[T>G]A	1	BC-1_1E20_2K2
T>G	TTC	T[T>G]C	2	BC-1_1E20_2K2
T>G	TTG	T[T>G]G	4	BC-1_1E20_2K2
T>G	TTT	T[T>G]T	7	BC-1_1E20_2K2
C>A	ACA	A[C>A]A	18	HT-115_8_1s1
C>A	ACC	A[C>A]C	26	HT-115_8_1s1
C>A	ACG	A[C>A]G	8	HT-115_8_1s1
C>A	ACT	A[C>A]T	105	HT-115_8_1s1
C>A	CCA	C[C>A]A	79	HT-115_8_1s1
C>A	CCC	C[C>A]C	35	HT-115_8_1s1
C>A	CCG	C[C>A]G	9	HT-115_8_1s1
C>A	CCT	C[C>A]T	403	HT-115_8_1s1
C>A	GCA	G[C>A]A	34	HT-115_8_1s1
C>A	GCC	G[C>A]C	26	HT-115_8_1s1
C>A	GCG	G[C>A]G	3	HT-115_8_1s1
C>A	GCT	G[C>A]T	155	HT-115_8_1s1
C>A	TCA	T[C>A]A	124	HT-115_8_1s1
C>A	TCC	T[C>A]C	95	HT-115_8_1s1
C>A	TCG	T[C>A]G	11	HT-115_8_1s1
C>A	TCT	T[C>A]T	1713	HT-115_8_1s1
C>G	ACA	A[C>G]A	27	HT-115_8_1s1
C>G	ACC	A[C>G]C	14	HT-115_8_1s1
C>G	ACG	A[C>G]G	3	HT-115_8_1s1
C>G	ACT	A[C>G]T	12	HT-115_8_1s1
C>G	CCA	C[C>G]A	4	HT-115_8_1s1
C>G	CCC	C[C>G]C	4	HT-115_8_1s1
C>G	CCG	C[C>G]G	0	HT-115_8_1s1
C>G	CCT	C[C>G]T	4	HT-115_8_1s1
C>G	GCA	G[C>G]A	12	HT-115_8_1s1
C>G	GCC	G[C>G]C	7	HT-115_8_1s1
C>G	GCG	G[C>G]G	1	HT-115_8_1s1
C>G	GCT	G[C>G]T	8	HT-115_8_1s1
C>G	TCA	T[C>G]A	16	HT-115_8_1s1
C>G	TCC	T[C>G]C	9	HT-115_8_1s1
C>G	TCG	T[C>G]G	2	HT-115_8_1s1
C>G	TCT	T[C>G]T	12	HT-115_8_1s1
C>T	ACA	A[C>T]A	59	HT-115_8_1s1
C>T	ACC	A[C>T]C	53	HT-115_8_1s1
C>T	ACG	A[C>T]G	52	HT-115_8_1s1
C>T	ACT	A[C>T]T	75	HT-115_8_1s1
C>T	CCA	C[C>T]A	35	HT-115_8_1s1
C>T	CCC	C[C>T]C	53	HT-115_8_1s1
C>T	CCG	C[C>T]G	47	HT-115_8_1s1
C>T	CCT	C[C>T]T	57	HT-115_8_1s1
C>T	GCA	G[C>T]A	49	HT-115_8_1s1
C>T	GCC	G[C>T]C	101	HT-115_8_1s1
C>T	GCG	G[C>T]G	111	HT-115_8_1s1
C>T	GCT	G[C>T]T	95	HT-115_8_1s1
C>T	TCA	T[C>T]A	40	HT-115_8_1s1
C>T	TCC	T[C>T]C	118	HT-115_8_1s1
C>T	TCG	T[C>T]G	176	HT-115_8_1s1
C>T	TCT	T[C>T]T	222	HT-115_8_1s1
T>A	ATA	A[T>A]A	18	HT-115_8_1s1
T>A	ATC	A[T>A]C	12	HT-115_8_1s1
T>A	ATG	A[T>A]G	5	HT-115_8_1s1
T>A	ATT	A[T>A]T	60	HT-115_8_1s1
T>A	CTA	C[T>A]A	8	HT-115_8_1s1
T>A	CTC	C[T>A]C	17	HT-115_8_1s1
T>A	CTG	C[T>A]G	7	HT-115_8_1s1
T>A	CTT	C[T>A]T	14	HT-115_8_1s1
T>A	GTA	G[T>A]A	3	HT-115_8_1s1
T>A	GTC	G[T>A]C	5	HT-115_8_1s1
T>A	GTG	G[T>A]G	4	HT-115_8_1s1
T>A	GTT	G[T>A]T	8	HT-115_8_1s1
T>A	TTA	T[T>A]A	20	HT-115_8_1s1
T>A	TTC	T[T>A]C	16	HT-115_8_1s1
T>A	TTG	T[T>A]G	6	HT-115_8_1s1
T>A	TTT	T[T>A]T	56	HT-115_8_1s1
T>C	ATA	A[T>C]A	150	HT-115_8_1s1
T>C	ATC	A[T>C]C	79	HT-115_8_1s1
T>C	ATG	A[T>C]G	96	HT-115_8_1s1
T>C	ATT	A[T>C]T	123	HT-115_8_1s1
T>C	CTA	C[T>C]A	43	HT-115_8_1s1
T>C	CTC	C[T>C]C	49	HT-115_8_1s1
T>C	CTG	C[T>C]G	57	HT-115_8_1s1
T>C	CTT	C[T>C]T	68	HT-115_8_1s1
T>C	GTA	G[T>C]A	140	HT-115_8_1s1
T>C	GTC	G[T>C]C	96	HT-115_8_1s1
T>C	GTG	G[T>C]G	116	HT-115_8_1s1
T>C	GTT	G[T>C]T	188	HT-115_8_1s1
T>C	TTA	T[T>C]A	140	HT-115_8_1s1
T>C	TTC	T[T>C]C	137	HT-115_8_1s1
T>C	TTG	T[T>C]G	98	HT-115_8_1s1
T>C	TTT	T[T>C]T	222	HT-115_8_1s1
T>G	ATA	A[T>G]A	19	HT-115_8_1s1
T>G	ATC	A[T>G]C	35	HT-115_8_1s1
T>G	ATG	A[T>G]G	14	HT-115_8_1s1
T>G	ATT	A[T>G]T	242	HT-115_8_1s1
T>G	CTA	C[T>G]A	31	HT-115_8_1s1
T>G	CTC	C[T>G]C	24	HT-115_8_1s1
T>G	CTG	C[T>G]G	37	HT-115_8_1s1
T>G	CTT	C[T>G]T	238	HT-115_8_1s1
T>G	GTA	G[T>G]A	7	HT-115_8_1s1
T>G	GTC	G[T>G]C	14	HT-115_8_1s1
T>G	GTG	G[T>G]G	5	HT-115_8_1s1
T>G	GTT	G[T>G]T	36	HT-115_8_1s1
T>G	TTA	T[T>G]A	44	HT-115_8_1s1
T>G	TTC	T[T>G]C	52	HT-115_8_1s1
T>G	TTG	T[T>G]G	19	HT-115_8_1s1
T>G	TTT	T[T>G]T	688	HT-115_8_1s1
C>A	ACA	A[C>A]A	4320	KX004
C>A	ACT	A[C>A]T	1864	KX004
C>A	ACG	A[C>A]G	499	KX004
C>A	ACC	A[C>A]C	2035	KX004
C>A	TCA	T[C>A]A	1325	KX004
C>A	TCT	T[C>A]T	1219	KX004
C>A	TCG	T[C>A]G	382	KX004
C>A	TCC	T[C>A]C	1293	KX004
C>A	GCA	G[C>A]A	2598	KX004
C>A	GCT	G[C>A]T	1355	KX004
C>A	GCG	G[C>A]G	408	KX004
C>A	GCC	G[C>A]C	1183	KX004
C>A	CCA	C[C>A]A	4212	KX004
C>A	CCT	C[C>A]T	2073	KX004
C>A	CCG	C[C>A]G	614	KX004
C>A	CCC	C[C>A]C	1511	KX004
C>G	ACA	A[C>G]A	5163	KX004
C>G	ACT	A[C>G]T	2779	KX004
C>G	ACG	A[C>G]G	505	KX004
C>G	ACC	A[C>G]C	1417	KX004
C>G	TCA	T[C>G]A	1590	KX004
C>G	TCT	T[C>G]T	3031	KX004
C>G	TCG	T[C>G]G	368	KX004
C>G	TCC	T[C>G]C	2037	KX004
C>G	GCA	G[C>G]A	2007	KX004
C>G	GCT	G[C>G]T	1648	KX004
C>G	GCG	G[C>G]G	344	KX004
C>G	GCC	G[C>G]C	1398	KX004
C>G	CCA	C[C>G]A	2516	KX004
C>G	CCT	C[C>G]T	2471	KX004
C>G	CCG	C[C>G]G	438	KX004
C>G	CCC	C[C>G]C	1872	KX004
C>T	ACA	A[C>T]A	16671	KX004
C>T	ACT	A[C>T]T	12398	KX004
C>T	ACG	A[C>T]G	22532	KX004
C>T	ACC	A[C>T]C	10170	KX004
C>T	TCA	T[C>T]A	5461	KX004
C>T	TCT	T[C>T]T	8653	KX004
C>T	TCG	T[C>T]G	7543	KX004
C>T	TCC	T[C>T]C	7317	KX004
C>T	GCA	G[C>T]A	7554	KX004
C>T	GCT	G[C>T]T	16588	KX004
C>T	GCG	G[C>T]G	11177	KX004
C>T	GCC	G[C>T]C	10464	KX004
C>T	CCA	C[C>T]A	10555	KX004
C>T	CCT	C[C>T]T	21939	KX004
C>T	CCG	C[C>T]G	10930	KX004
C>T	CCC	C[C>T]C	10943	KX004
T>A	ATA	A[T>A]A	2093	KX004
T>A	ATT	A[T>A]T	2070	KX004
T>A	ATG	A[T>A]G	2356	KX004
T>A	ATC	A[T>A]C	2783	KX004
T>A	TTA	T[T>A]A	1259	KX004
T>A	TTT	T[T>A]T	2191	KX004
T>A	TTG	T[T>A]G	952	KX004
T>A	TTC	T[T>A]C	1165	KX004
T>A	GTA	G[T>A]A	949	KX004
T>A	GTT	G[T>A]T	1183	KX004
T>A	GTG	G[T>A]G	1092	KX004
T>A	GTC	G[T>A]C	945	KX004
T>A	CTA	C[T>A]A	1296	KX004
T>A	CTT	C[T>A]T	1601	KX004
T>A	CTG	C[T>A]G	1937	KX004
T>A	CTC	C[T>A]C	1414	KX004
T>C	ATA	A[T>C]A	9829	KX004
T>C	ATT	A[T>C]T	11340	KX004
T>C	ATG	A[T>C]G	8638	KX004
T>C	ATC	A[T>C]C	3329	KX004
T>C	TTA	T[T>C]A	4026	KX004
T>C	TTT	T[T>C]T	6142	KX004
T>C	TTG	T[T>C]G	2832	KX004
T>C	TTC	T[T>C]C	2552	KX004
T>C	GTA	G[T>C]A	3121	KX004
T>C	GTT	G[T>C]T	5403	KX004
T>C	GTG	G[T>C]G	2938	KX004
T>C	GTC	G[T>C]C	2231	KX004
T>C	CTA	C[T>C]A	3227	KX004
T>C	CTT	C[T>C]T	3688	KX004
T>C	CTG	C[T>C]G	4085	KX004
T>C	CTC	C[T>C]C	3307	KX004
T>G	ATA	A[T>G]A	829	KX004
T>G	ATT	A[T>G]T	1011	KX004
T>G	ATG	A[T>G]G	1470	KX004
T>G	ATC	A[T>G]C	645	KX004
T>G	TTA	T[T>G]A	926	KX004
T>G	TTT	T[T>G]T	1735	KX004
T>G	TTG	T[T>G]G	1280	KX004
T>G	TTC	T[T>G]C	938	KX004
T>G	GTA	G[T>G]A	543	KX004
T>G	GTT	G[T>G]T	620	KX004
T>G	GTG	G[T>G]G	1107	KX004
T>G	GTC	G[T>G]C	414	KX004
T>G	CTA	C[T>G]A	564	KX004
T>G	CTT	C[T>G]T	1152	KX004
T>G	CTG	C[T>G]G	1409	KX004
T>G	CTC	C[T>G]C	1064	KX004
C>A	ACA	A[C>A]A	89	CB001
C>A	ACT	A[C>A]T	50	CB001
C>A	ACG	A[C>A]G	18	CB001
C>A	ACC	A[C>A]C	67	CB001
C>A	TCA	T[C>A]A	75	CB001
C>A	TCT	T[C>A]T	108	CB001
C>A	TCG	T[C>A]G	24	CB001
C>A	TCC	T[C>A]C	76	CB001
C>A	GCA	G[C>A]A	103	CB001
C>A	GCT	G[C>A]T	57	CB001
C>A	GCG	G[C>A]G	20	CB001
C>A	GCC	G[C>A]C	41	CB001
C>A	CCA	C[C>A]A	83	CB001
C>A	CCT	C[C>A]T	61	CB001
C>A	CCG	C[C>A]G	25	CB001
C>A	CCC	C[C>A]C	54	CB001
C>G	ACA	A[C>G]A	43	CB001
C>G	ACT	A[C>G]T	35	CB001
C>G	ACG	A[C>G]G	23	CB001
C>G	ACC	A[C>G]C	20	CB001
C>G	TCA	T[C>G]A	29	CB001
C>G	TCT	T[C>G]T	58	CB001
C>G	TCG	T[C>G]G	15	CB001
C>G	TCC	T[C>G]C	27	CB001
C>G	GCA	G[C>G]A	20	CB001
C>G	GCT	G[C>G]T	29	CB001
C>G	GCG	G[C>G]G	6	CB001
C>G	GCC	G[C>G]C	9	CB001
C>G	CCA	C[C>G]A	22	CB001
C>G	CCT	C[C>G]T	30	CB001
C>G	CCG	C[C>G]G	18	CB001
C>G	CCC	C[C>G]C	39	CB001
C>T	ACA	A[C>T]A	153	CB001
C>T	ACT	A[C>T]T	108	CB001
C>T	ACG	A[C>T]G	769	CB001
C>T	ACC	A[C>T]C	86	CB001
C>T	TCA	T[C>T]A	99	CB001
C>T	TCT	T[C>T]T	112	CB001
C>T	TCG	T[C>T]G	347	CB001
C>T	TCC	T[C>T]C	104	CB001
C>T	GCA	G[C>T]A	105	CB001
C>T	GCT	G[C>T]T	89	CB001
C>T	GCG	G[C>T]G	444	CB001
C>T	GCC	G[C>T]C	99	CB001
C>T	CCA	C[C>T]A	97	CB001
C>T	CCT	C[C>T]T	117	CB001
C>T	CCG	C[C>T]G	458	CB001
C>T	CCC	C[C>T]C	77	CB001
T>A	ATA	A[T>A]A	36	CB001
T>A	ATT	A[T>A]T	71	CB001
T>A	ATG	A[T>A]G	37	CB001
T>A	ATC	A[T>A]C	37	CB001
T>A	TTA	T[T>A]A	74	CB001
T>A	TTT	T[T>A]T	79	CB001
T>A	TTG	T[T>A]G	34	CB001
T>A	TTC	T[T>A]C	25	CB001
T>A	GTA	G[T>A]A	30	CB001
T>A	GTT	G[T>A]T	43	CB001
T>A	GTG	G[T>A]G	26	CB001
T>A	GTC	G[T>A]C	17	CB001
T>A	CTA	C[T>A]A	32	CB001
T>A	CTT	C[T>A]T	51	CB001
T>A	CTG	C[T>A]G	40	CB001
T>A	CTC	C[T>A]C	26	CB001
T>C	ATA	A[T>C]A	86	CB001
T>C	ATT	A[T>C]T	115	CB001
T>C	ATG	A[T>C]G	52	CB001
T>C	ATC	A[T>C]C	29	CB001
T>C	TTA	T[T>C]A	48	CB001
T>C	TTT	T[T>C]T	74	CB001
T>C	TTG	T[T>C]G	33	CB001
T>C	TTC	T[T>C]C	33	CB001
T>C	GTA	G[T>C]A	32	CB001
T>C	GTT	G[T>C]T	47	CB001
T>C	GTG	G[T>C]G	37	CB001
T>C	GTC	G[T>C]C	22	CB001
T>C	CTA	C[T>C]A	39	CB001
T>C	CTT	C[T>C]T	40	CB001
T>C	CTG	C[T>C]G	52	CB001
T>C	CTC	C[T>C]C	22	CB001
T>G	ATA	A[T>G]A	16	CB001
T>G	ATT	A[T>G]T	33	CB001
T>G	ATG	A[T>G]G	21	CB001
T>G	ATC	A[T>G]C	4	CB001
T>G	TTA	T[T>G]A	22	CB001
T>G	TTT	T[T>G]T	58	CB001
T>G	TTG	T[T>G]G	27	CB001
T>G	TTC	T[T>G]C	13	CB001
T>G	GTA	G[T>G]A	12	CB001
T>G	GTT	G[T>G]T	18	CB001
T>G	GTG	G[T>G]G	20	CB001
T>G	GTC	G[T>G]C	7	CB001
T>G	CTA	C[T>G]A	14	CB001
T>G	CTT	C[T>G]T	22	CB001
T>G	CTG	C[T>G]G	17	CB001
T>G	CTC	C[T>G]C	7	CB001

## Sheet: Table 3
Supplementary Table 3. Homo sapiens positive- and negative-control SBS96 counts
Substitution	Trinucleotide	SBS96	Adjusted count	Sample	Callable reference trinucleotide count	Callable HiFi trinucleotide count	Empirical error rate	Phred-scaled error rate
C>A	ACA	A[C>A]A	261.85	BC-1	96938044	1299820177	.	.
C>A	ACC	A[C>A]C	97.43	BC-1	51637344	669270145	.	.
C>A	ACG	A[C>A]G	16.01	BC-1	11931074	154870990	.	.
C>A	ACT	A[C>A]T	101.18	BC-1	77697074	1006238359	.	.
C>G	ACA	A[C>G]A	38.97	BC-1	96938044	1299820177	.	.
C>G	ACC	A[C>G]C	22.04	BC-1	51637344	669270145	.	.
C>G	ACG	A[C>G]G	13.55	BC-1	11931074	154870990	.	.
C>G	ACT	A[C>G]T	37.94	BC-1	77697074	1006238359	.	.
C>T	ACA	A[C>T]A	823.32	BC-1	96938044	1299820177	.	.
C>T	ACC	A[C>T]C	259.83	BC-1	51637344	669270145	.	.
C>T	ACG	A[C>T]G	142.84	BC-1	11931074	154870990	.	.
C>T	ACT	A[C>T]T	354.12	BC-1	77697074	1006238359	.	.
T>A	ATA	A[T>A]A	72.17	BC-1	98212644	1724774467	.	.
T>A	ATC	A[T>A]C	82.72	BC-1	64986975	1195415425	.	.
T>A	ATG	A[T>A]G	225.57	BC-1	88548156	1525580386	.	.
T>A	ATT	A[T>A]T	524	BC-1	111173575	1593329174	.	.
T>C	ATA	A[T>C]A	118.43	BC-1	98212644	1724774467	.	.
T>C	ATC	A[T>C]C	32.37	BC-1	64986975	1195415425	.	.
T>C	ATG	A[T>C]G	57.11	BC-1	88548156	1525580386	.	.
T>C	ATT	A[T>C]T	57.16	BC-1	111173575	1593329174	.	.
T>G	ATA	A[T>G]A	28.68	BC-1	98212644	1724774467	.	.
T>G	ATC	A[T>G]C	7.19	BC-1	64986975	1195415425	.	.
T>G	ATG	A[T>G]G	23.79	BC-1	88548156	1525580386	.	.
T>G	ATT	A[T>G]T	25.41	BC-1	111173575	1593329174	.	.
C>A	CCA	C[C>A]A	196.92	BC-1	80258393	1038335406	.	.
C>A	CCC	C[C>A]C	41.24	BC-1	65003265	1417563082	.	.
C>A	CCG	C[C>A]G	24.41	BC-1	11443499	136422509	.	.
C>A	CCT	C[C>A]T	112.59	BC-1	78626386	1043962881	.	.
C>G	CCA	C[C>G]A	17.07	BC-1	80258393	1038335406	.	.
C>G	CCC	C[C>G]C	9.93	BC-1	65003265	1417563082	.	.
C>G	CCG	C[C>G]G	39.53	BC-1	11443499	136422509	.	.
C>G	CCT	C[C>G]T	16.89	BC-1	78626386	1043962881	.	.
C>T	CCA	C[C>T]A	1084.74	BC-1	80258393	1038335406	.	.
C>T	CCC	C[C>T]C	280.27	BC-1	65003265	1417563082	.	.
C>T	CCG	C[C>T]G	188.34	BC-1	11443499	136422509	.	.
C>T	CCT	C[C>T]T	676.64	BC-1	78626386	1043962881	.	.
T>A	CTA	C[T>A]A	48.46	BC-1	62925421	1184767136	.	.
T>A	CTC	C[T>A]C	20.25	BC-1	82535979	1551211769	.	.
T>A	CTG	C[T>A]G	19.35	BC-1	99324482	1783181329	.	.
T>A	CTT	C[T>A]T	18.17	BC-1	90901221	1391779596	.	.
T>C	CTA	C[T>C]A	41.41	BC-1	62925421	1184767136	.	.
T>C	CTC	C[T>C]C	50.2	BC-1	82535979	1551211769	.	.
T>C	CTG	C[T>C]G	53.45	BC-1	99324482	1783181329	.	.
T>C	CTT	C[T>C]T	372.53	BC-1	90901221	1391779596	.	.
T>G	CTA	C[T>G]A	10.57	BC-1	62925421	1184767136	.	.
T>G	CTC	C[T>G]C	13.21	BC-1	82535979	1551211769	.	.
T>G	CTG	C[T>G]G	15.67	BC-1	99324482	1783181329	.	.
T>G	CTT	C[T>G]T	19.18	BC-1	90901221	1391779596	.	.
C>A	GCA	G[C>A]A	251.22	BC-1	70129197	970233829	.	.
C>A	GCC	G[C>A]C	55.14	BC-1	52348050	688302276	.	.
C>A	GCG	G[C>A]G	20.97	BC-1	11407574	148080384	.	.
C>A	GCT	G[C>A]T	198.9	BC-1	67759143	886160259	.	.
C>G	GCA	G[C>G]A	13.1	BC-1	70129197	970233829	.	.
C>G	GCC	G[C>G]C	65.27	BC-1	52348050	688302276	.	.
C>G	GCG	G[C>G]G	16.04	BC-1	11407574	148080384	.	.
C>G	GCT	G[C>G]T	18.76	BC-1	67759143	886160259	.	.
C>T	GCA	G[C>T]A	557.2	BC-1	70129197	970233829	.	.
C>T	GCC	G[C>T]C	245.33	BC-1	52348050	688302276	.	.
C>T	GCG	G[C>T]G	164.05	BC-1	11407574	148080384	.	.
C>T	GCT	G[C>T]T	286.47	BC-1	67759143	886160259	.	.
T>A	GTA	G[T>A]A	70.55	BC-1	54826490	983531278	.	.
T>A	GTC	G[T>A]C	21.41	BC-1	46176552	856576623	.	.
T>A	GTG	G[T>A]G	21.77	BC-1	72252286	1241122660	.	.
T>A	GTT	G[T>A]T	32.44	BC-1	63593052	901056019	.	.
T>C	GTA	G[T>C]A	39.4	BC-1	54826490	983531278	.	.
T>C	GTC	G[T>C]C	26.76	BC-1	46176552	856576623	.	.
T>C	GTG	G[T>C]G	44.48	BC-1	72252286	1241122660	.	.
T>C	GTT	G[T>C]T	36.62	BC-1	63593052	901056019	.	.
T>G	GTA	G[T>G]A	10.99	BC-1	54826490	983531278	.	.
T>G	GTC	G[T>G]C	8.92	BC-1	46176552	856576623	.	.
T>G	GTG	G[T>G]G	36.91	BC-1	72252286	1241122660	.	.
T>G	GTT	G[T>G]T	58.59	BC-1	63593052	901056019	.	.
C>A	TCA	T[C>A]A	148.85	BC-1	94911918	1320785466	.	.
C>A	TCC	T[C>A]C	71.75	BC-1	66355044	874106408	.	.
C>A	TCG	T[C>A]G	19.42	BC-1	10591538	141112013	.	.
C>A	TCT	T[C>A]T	311.47	BC-1	104670941	1327407503	.	.
C>G	TCA	T[C>G]A	18.9	BC-1	94911918	1320785466	.	.
C>G	TCC	T[C>G]C	17.66	BC-1	66355044	874106408	.	.
C>G	TCG	T[C>G]G	6.07	BC-1	10591538	141112013	.	.
C>G	TCT	T[C>G]T	32.92	BC-1	104670941	1327407503	.	.
C>T	TCA	T[C>T]A	25192.7	BC-1	94911918	1320785466	.	.
C>T	TCC	T[C>T]C	4333.86	BC-1	66355044	874106408	.	.
C>T	TCG	T[C>T]G	2242.56	BC-1	10591538	141112013	.	.
C>T	TCT	T[C>T]T	20507.8	BC-1	104670941	1327407503	.	.
T>A	TTA	T[T>A]A	159.71	BC-1	92543082	1374517952	.	.
T>A	TTC	T[T>A]C	16.79	BC-1	88106586	1354579119	.	.
T>A	TTG	T[T>A]G	24.2	BC-1	85117205	1290090987	.	.
T>A	TTT	T[T>A]T	52.82	BC-1	187803532	4073384394	.	.
T>C	TTA	T[T>C]A	44.76	BC-1	92543082	1374517952	.	.
T>C	TTC	T[T>C]C	173.79	BC-1	88106586	1354579119	.	.
T>C	TTG	T[T>C]G	46.39	BC-1	85117205	1290090987	.	.
T>C	TTT	T[T>C]T	109.48	BC-1	187803532	4073384394	.	.
T>G	TTA	T[T>G]A	26.45	BC-1	92543082	1374517952	.	.
T>G	TTC	T[T>G]C	21.72	BC-1	88106586	1354579119	.	.
T>G	TTG	T[T>G]G	53.44	BC-1	85117205	1290090987	.	.
T>G	TTT	T[T>G]T	65.84	BC-1	187803532	4073384394	.	.
C>A	ACA	A[C>A]A	513.98	HT-115	98772186	1405575493	.	.
C>A	ACC	A[C>A]C	390	HT-115	52799037	709417558	.	.
C>A	ACG	A[C>A]G	33.52	HT-115	12112082	169480734	.	.
C>A	ACT	A[C>A]T	1854.5	HT-115	79252779	1100908795	.	.
C>G	ACA	A[C>G]A	348.48	HT-115	98772186	1405575493	.	.
C>G	ACC	A[C>G]C	98.07	HT-115	52799037	709417558	.	.
C>G	ACG	A[C>G]G	12.71	HT-115	12112082	169480734	.	.
C>G	ACT	A[C>G]T	165.43	HT-115	79252779	1100908795	.	.
C>T	ACA	A[C>T]A	830.99	HT-115	98772186	1405575493	.	.
C>T	ACC	A[C>T]C	927.09	HT-115	52799037	709417558	.	.
C>T	ACG	A[C>T]G	1261.04	HT-115	12112082	169480734	.	.
C>T	ACT	A[C>T]T	1167.6	HT-115	79252779	1100908795	.	.
T>A	ATA	A[T>A]A	171.34	HT-115	100192261	1748649780	.	.
T>A	ATC	A[T>A]C	117.72	HT-115	66161138	1216743567	.	.
T>A	ATG	A[T>A]G	215.91	HT-115	90234671	1566135161	.	.
T>A	ATT	A[T>A]T	899.91	HT-115	113737106	1636548429	.	.
T>C	ATA	A[T>C]A	1786.33	HT-115	100192261	1748649780	.	.
T>C	ATC	A[T>C]C	845.03	HT-115	66161138	1216743567	.	.
T>C	ATG	A[T>C]G	1178.41	HT-115	90234671	1566135161	.	.
T>C	ATT	A[T>C]T	1440.72	HT-115	113737106	1636548429	.	.
T>G	ATA	A[T>G]A	293.46	HT-115	100192261	1748649780	.	.
T>G	ATC	A[T>G]C	396.96	HT-115	66161138	1216743567	.	.
T>G	ATG	A[T>G]G	220.71	HT-115	90234671	1566135161	.	.
T>G	ATT	A[T>G]T	3114.76	HT-115	113737106	1636548429	.	.
C>A	CCA	C[C>A]A	864.11	HT-115	81983759	1096748299	.	.
C>A	CCC	C[C>A]C	303.21	HT-115	65922003	1431032914	.	.
C>A	CCG	C[C>A]G	89.29	HT-115	11630055	146291416	.	.
C>A	CCT	C[C>A]T	5045.47	HT-115	80445146	1107113276	.	.
C>G	CCA	C[C>G]A	48.19	HT-115	81983759	1096748299	.	.
C>G	CCC	C[C>G]C	57.38	HT-115	65922003	1431032914	.	.
C>G	CCG	C[C>G]G	53.57	HT-115	11630055	146291416	.	.
C>G	CCT	C[C>G]T	75.32	HT-115	80445146	1107113276	.	.
C>T	CCA	C[C>T]A	642.2	HT-115	81983759	1096748299	.	.
C>T	CCC	C[C>T]C	523.44	HT-115	65922003	1431032914	.	.
C>T	CCG	C[C>T]G	896.25	HT-115	11630055	146291416	.	.
C>T	CCT	C[C>T]T	1094.39	HT-115	80445146	1107113276	.	.
T>A	CTA	C[T>A]A	102.36	HT-115	64106028	1202544033	.	.
T>A	CTC	C[T>A]C	156.61	HT-115	83854625	1588436526	.	.
T>A	CTG	C[T>A]G	78.14	HT-115	100976124	1841432848	.	.
T>A	CTT	C[T>A]T	217.52	HT-115	92747823	1434385477	.	.
T>C	CTA	C[T>C]A	373.54	HT-115	64106028	1202544033	.	.
T>C	CTC	C[T>C]C	898.96	HT-115	83854625	1588436526	.	.
T>C	CTG	C[T>C]G	553.44	HT-115	100976124	1841432848	.	.
T>C	CTT	C[T>C]T	1083.54	HT-115	92747823	1434385477	.	.
T>G	CTA	C[T>G]A	433.7	HT-115	64106028	1202544033	.	.
T>G	CTC	C[T>G]C	292.87	HT-115	83854625	1588436526	.	.
T>G	CTG	C[T>G]G	389.8	HT-115	100976124	1841432848	.	.
T>G	CTT	C[T>G]T	2984.3	HT-115	92747823	1434385477	.	.
C>A	GCA	G[C>A]A	339	HT-115	71386323	1052239859	.	.
C>A	GCC	G[C>A]C	324.81	HT-115	53411947	732446870	.	.
C>A	GCG	G[C>A]G	38.73	HT-115	11539029	163512716	.	.
C>A	GCT	G[C>A]T	2648.96	HT-115	69046739	974942083	.	.
C>G	GCA	G[C>G]A	129.25	HT-115	71386323	1052239859	.	.
C>G	GCC	G[C>G]C	106.44	HT-115	53411947	732446870	.	.
C>G	GCG	G[C>G]G	34.18	HT-115	11539029	163512716	.	.
C>G	GCT	G[C>G]T	81.2	HT-115	69046739	974942083	.	.
C>T	GCA	G[C>T]A	882.09	HT-115	71386323	1052239859	.	.
C>T	GCC	G[C>T]C	1609.8	HT-115	53411947	732446870	.	.
C>T	GCG	G[C>T]G	2351.34	HT-115	11539029	163512716	.	.
C>T	GCT	G[C>T]T	1784.02	HT-115	69046739	974942083	.	.
T>A	GTA	G[T>A]A	96.51	HT-115	55866911	1004927602	.	.
T>A	GTC	G[T>A]C	54.65	HT-115	46939842	878406667	.	.
T>A	GTG	G[T>A]G	47.93	HT-115	73513526	1289399295	.	.
T>A	GTT	G[T>A]T	132.05	HT-115	65310889	938231356	.	.
T>C	GTA	G[T>C]A	1935.85	HT-115	55866911	1004927602	.	.
T>C	GTC	G[T>C]C	1125.21	HT-115	46939842	878406667	.	.
T>C	GTG	G[T>C]G	1581.81	HT-115	73513526	1289399295	.	.
T>C	GTT	G[T>C]T	2516.4	HT-115	65310889	938231356	.	.
T>G	GTA	G[T>G]A	87.23	HT-115	55866911	1004927602	.	.
T>G	GTC	G[T>G]C	193.51	HT-115	46939842	878406667	.	.
T>G	GTG	G[T>G]G	196.43	HT-115	73513526	1289399295	.	.
T>G	GTT	G[T>G]T	559.9	HT-115	65310889	938231356	.	.
C>A	TCA	T[C>A]A	2539.29	HT-115	96808387	1425316250	.	.
C>A	TCC	T[C>A]C	1208.25	HT-115	67832372	918336645	.	.
C>A	TCG	T[C>A]G	122.34	HT-115	10681364	153245514	.	.
C>A	TCT	T[C>A]T	32558.3	HT-115	106922628	1455898348	.	.
C>G	TCA	T[C>G]A	127.13	HT-115	96808387	1425316250	.	.
C>G	TCC	T[C>G]C	84.27	HT-115	67832372	918336645	.	.
C>G	TCG	T[C>G]G	6.8	HT-115	10681364	153245514	.	.
C>G	TCT	T[C>G]T	206.51	HT-115	106922628	1455898348	.	.
C>T	TCA	T[C>T]A	835.46	HT-115	96808387	1425316250	.	.
C>T	TCC	T[C>T]C	1743.43	HT-115	67832372	918336645	.	.
C>T	TCG	T[C>T]G	3629.3	HT-115	10681364	153245514	.	.
C>T	TCT	T[C>T]T	5466.61	HT-115	106922628	1455898348	.	.
T>A	TTA	T[T>A]A	316.18	HT-115	94749491	1404585108	.	.
T>A	TTC	T[T>A]C	195.54	HT-115	90176465	1392686214	.	.
T>A	TTG	T[T>A]G	119.08	HT-115	86978787	1330306066	.	.
T>A	TTT	T[T>A]T	756.64	HT-115	190687082	3980966776	.	.
T>C	TTA	T[T>C]A	1636.05	HT-115	94749491	1404585108	.	.
T>C	TTC	T[T>C]C	1691.67	HT-115	90176465	1392686214	.	.
T>C	TTG	T[T>C]G	1296.68	HT-115	86978787	1330306066	.	.
T>C	TTT	T[T>C]T	2383.41	HT-115	190687082	3980966776	.	.
T>G	TTA	T[T>G]A	869.51	HT-115	94749491	1404585108	.	.
T>G	TTC	T[T>G]C	812.24	HT-115	90176465	1392686214	.	.
T>G	TTG	T[T>G]G	321.63	HT-115	86978787	1330306066	.	.
T>G	TTT	T[T>G]T	9364.6	HT-115	190687082	3980966776	.	.
C>A	ACA	A[C>A]A	339.66	PD48473b	100071458	1101764543	.	.
C>A	ACC	A[C>A]C	94.2	PD48473b	53679399	574692928	.	.
C>A	ACG	A[C>A]G	23.6	PD48473b	12099175	127343916	.	.
C>A	ACT	A[C>A]T	99.25	PD48473b	80280018	850202031	.	.
C>G	ACA	A[C>G]A	130.92	PD48473b	100071458	1101764543	.	.
C>G	ACC	A[C>G]C	41.21	PD48473b	53679399	574692928	.	.
C>G	ACG	A[C>G]G	23.6	PD48473b	12099175	127343916	.	.
C>G	ACT	A[C>G]T	81.21	PD48473b	80280018	850202031	.	.
C>T	ACA	A[C>T]A	681.8	PD48473b	100071458	1101764543	.	.
C>T	ACC	A[C>T]C	288.48	PD48473b	53679399	574692928	.	.
C>T	ACG	A[C>T]G	836.04	PD48473b	12099175	127343916	.	.
C>T	ACT	A[C>T]T	402.16	PD48473b	80280018	850202031	.	.
T>A	ATA	A[T>A]A	119.2	PD48473b	102212065	1508770625	.	.
T>A	ATC	A[T>A]C	118.33	PD48473b	67330301	1053891066	.	.
T>A	ATG	A[T>A]G	208.38	PD48473b	91829295	1341927916	.	.
T>A	ATT	A[T>A]T	474.7	PD48473b	118065231	1415777274	.	.
T>C	ATA	A[T>C]A	234.71	PD48473b	102212065	1508770625	.	.
T>C	ATC	A[T>C]C	67.11	PD48473b	67330301	1053891066	.	.
T>C	ATG	A[T>C]G	183.98	PD48473b	91829295	1341927916	.	.
T>C	ATT	A[T>C]T	221.09	PD48473b	118065231	1415777274	.	.
T>G	ATA	A[T>G]A	36.96	PD48473b	102212065	1508770625	.	.
T>G	ATC	A[T>G]C	7.95	PD48473b	67330301	1053891066	.	.
T>G	ATG	A[T>G]G	30.98	PD48473b	91829295	1341927916	.	.
T>G	ATT	A[T>G]T	40.1	PD48473b	118065231	1415777274	.	.
C>A	CCA	C[C>A]A	265.03	PD48473b	84824661	916107122	.	.
C>A	CCC	C[C>A]C	50.78	PD48473b	66842121	1254638371	.	.
C>A	CCG	C[C>A]G	25.5	PD48473b	11754639	116445680	.	.
C>A	CCT	C[C>A]T	104.63	PD48473b	82472072	907222017	.	.
C>G	CCA	C[C>G]A	52.31	PD48473b	84824661	916107122	.	.
C>G	CCC	C[C>G]C	36.06	PD48473b	66842121	1254638371	.	.
C>G	CCG	C[C>G]G	35.94	PD48473b	11754639	116445680	.	.
C>G	CCT	C[C>G]T	60.94	PD48473b	82472072	907222017	.	.
C>T	CCA	C[C>T]A	352.21	PD48473b	84824661	916107122	.	.
C>T	CCC	C[C>T]C	232.55	PD48473b	66842121	1254638371	.	.
C>T	CCG	C[C>T]G	359.35	PD48473b	11754639	116445680	.	.
C>T	CCT	C[C>T]T	757.68	PD48473b	82472072	907222017	.	.
T>A	CTA	C[T>A]A	77.34	PD48473b	65232084	1041172125	.	.
T>A	CTC	C[T>A]C	39.26	PD48473b	85219089	1376512074	.	.
T>A	CTG	C[T>A]G	60.85	PD48473b	102491064	1577245248	.	.
T>A	CTT	C[T>A]T	64.51	PD48473b	95945303	1233103693	.	.
T>C	CTA	C[T>C]A	55.62	PD48473b	65232084	1041172125	.	.
T>C	CTC	C[T>C]C	139.96	PD48473b	85219089	1376512074	.	.
T>C	CTG	C[T>C]G	67.12	PD48473b	102491064	1577245248	.	.
T>C	CTT	C[T>C]T	292.85	PD48473b	95945303	1233103693	.	.
T>G	CTA	C[T>G]A	24.33	PD48473b	65232084	1041172125	.	.
T>G	CTC	C[T>G]C	17.07	PD48473b	85219089	1376512074	.	.
T>G	CTG	C[T>G]G	42.95	PD48473b	102491064	1577245248	.	.
T>G	CTT	C[T>G]T	41.98	PD48473b	95945303	1233103693	.	.
C>A	GCA	G[C>A]A	125.82	PD48473b	72321596	834836963	.	.
C>A	GCC	G[C>A]C	55.98	PD48473b	54870551	600894437	.	.
C>A	GCG	G[C>A]G	19.51	PD48473b	11636818	125745288	.	.
C>A	GCT	G[C>A]T	70.41	PD48473b	69937410	757649341	.	.
C>G	GCA	G[C>G]A	53.41	PD48473b	72321596	834836963	.	.
C>G	GCC	G[C>G]C	63.97	PD48473b	54870551	600894437	.	.
C>G	GCG	G[C>G]G	21.95	PD48473b	11636818	125745288	.	.
C>G	GCT	G[C>G]T	51.55	PD48473b	69937410	757649341	.	.
C>T	GCA	G[C>T]A	232.65	PD48473b	72321596	834836963	.	.
C>T	GCC	G[C>T]C	300.45	PD48473b	54870551	600894437	.	.
C>T	GCG	G[C>T]G	425.51	PD48473b	11636818	125745288	.	.
C>T	GCT	G[C>T]T	474	PD48473b	69937410	757649341	.	.
T>A	GTA	G[T>A]A	87.37	PD48473b	56858631	859001282	.	.
T>A	GTC	G[T>A]C	27.88	PD48473b	47684500	754377834	.	.
T>A	GTG	G[T>A]G	57.52	PD48473b	74586802	1088217778	.	.
T>A	GTT	G[T>A]T	46.89	PD48473b	67219580	797255187	.	.
T>C	GTA	G[T>C]A	81	PD48473b	56858631	859001282	.	.
T>C	GTC	G[T>C]C	50.53	PD48473b	47684500	754377834	.	.
T>C	GTG	G[T>C]G	89.06	PD48473b	74586802	1088217778	.	.
T>C	GTT	G[T>C]T	114.04	PD48473b	67219580	797255187	.	.
T>G	GTA	G[T>G]A	18.2	PD48473b	56858631	859001282	.	.
T>G	GTC	G[T>G]C	7.84	PD48473b	47684500	754377834	.	.
T>G	GTG	G[T>G]G	68.65	PD48473b	74586802	1088217778	.	.
T>G	GTT	G[T>G]T	57.55	PD48473b	67219580	797255187	.	.
C>A	TCA	T[C>A]A	62.52	PD48473b	98280327	1143948605	.	.
C>A	TCC	T[C>A]C	64.69	PD48473b	70507724	774291529	.	.
C>A	TCG	T[C>A]G	6.06	PD48473b	10835806	119263411	.	.
C>A	TCT	T[C>A]T	93.54	PD48473b	108582972	1138576288	.	.
C>G	TCA	T[C>G]A	43.65	PD48473b	98280327	1143948605	.	.
C>G	TCC	T[C>G]C	51.07	PD48473b	70507724	774291529	.	.
C>G	TCG	T[C>G]G	9.7	PD48473b	10835806	119263411	.	.
C>G	TCT	T[C>G]T	90.98	PD48473b	108582972	1138576288	.	.
C>T	TCA	T[C>T]A	185.2	PD48473b	98280327	1143948605	.	.
C>T	TCC	T[C>T]C	339.35	PD48473b	70507724	774291529	.	.
C>T	TCG	T[C>T]G	267.9	PD48473b	10835806	119263411	.	.
C>T	TCT	T[C>T]T	504.85	PD48473b	108582972	1138576288	.	.
T>A	TTA	T[T>A]A	173.88	PD48473b	98315137	1215246183	.	.
T>A	TTC	T[T>A]C	34.18	PD48473b	93150762	1199729248	.	.
T>A	TTG	T[T>A]G	38.91	PD48473b	89902889	1143141776	.	.
T>A	TTT	T[T>A]T	71.97	PD48473b	194424123	3595946044	.	.
T>C	TTA	T[T>C]A	84.84	PD48473b	98315137	1215246183	.	.
T>C	TTC	T[T>C]C	145.75	PD48473b	93150762	1199729248	.	.
T>C	TTG	T[T>C]G	63.49	PD48473b	89902889	1143141776	.	.
T>C	TTT	T[T>C]T	148.44	PD48473b	194424123	3595946044	.	.
T>G	TTA	T[T>G]A	37.71	PD48473b	98315137	1215246183	.	.
T>G	TTC	T[T>G]C	22.11	PD48473b	93150762	1199729248	.	.
T>G	TTG	T[T>G]G	75.78	PD48473b	89902889	1143141776	.	.
T>G	TTT	T[T>G]T	74.22	PD48473b	194424123	3595946044	.	.
C>A	ACA	A[C>A]A	130.02	PD47269d	98616085	2988112839	4.35127e-08	73.61
C>A	ACC	A[C>A]C	100.85	PD47269d	49387760	1440022612	7.00338e-08	71.55
C>A	ACG	A[C>A]G	14.17	PD47269d	11897035	349279589	4.05783e-08	73.92
C>A	ACT	A[C>A]T	38.95	PD47269d	79007623	2351849859	1.65624e-08	77.81
C>G	ACA	A[C>G]A	25.05	PD47269d	98616085	2988112839	8.38318e-09	80.77
C>G	ACC	A[C>G]C	8.58	PD47269d	49387760	1440022612	5.96032e-09	82.25
C>G	ACG	A[C>G]G	11.81	PD47269d	11897035	349279589	3.38153e-08	74.71
C>G	ACT	A[C>G]T	10.96	PD47269d	79007623	2351849859	4.65819e-09	83.32
C>T	ACA	A[C>T]A	91.85	PD47269d	98616085	2988112839	3.07383e-08	75.12
C>T	ACC	A[C>T]C	26.82	PD47269d	49387760	1440022612	1.8626e-08	77.3
C>T	ACG	A[C>T]G	175.98	PD47269d	11897035	349279589	5.03848e-07	62.98
C>T	ACT	A[C>T]T	82.77	PD47269d	79007623	2351849859	3.51952e-08	74.54
T>A	ATA	A[T>A]A	112.73	PD47269d	100477140	3771383703	2.9891e-08	75.24
T>A	ATC	A[T>A]C	139.64	PD47269d	66634607	2605521039	5.3595e-08	72.71
T>A	ATG	A[T>A]G	269.75	PD47269d	90185385	3340592563	8.07488e-08	70.93
T>A	ATT	A[T>A]T	846.16	PD47269d	109558667	3449208521	2.45321e-07	66.1
T>C	ATA	A[T>C]A	57.81	PD47269d	100477140	3771383703	1.53287e-08	78.14
T>C	ATC	A[T>C]C	17.93	PD47269d	66634607	2605521039	6.88044e-09	81.62
T>C	ATG	A[T>C]G	22.56	PD47269d	90185385	3340592563	6.75354e-09	81.7
T>C	ATT	A[T>C]T	23.76	PD47269d	109558667	3449208521	6.88937e-09	81.62
T>G	ATA	A[T>G]A	24.09	PD47269d	100477140	3771383703	6.38697e-09	81.95
T>G	ATC	A[T>G]C	4.72	PD47269d	66634607	2605521039	1.81064e-09	87.42
T>G	ATG	A[T>G]G	28.45	PD47269d	90185385	3340592563	8.51533e-09	80.7
T>G	ATT	A[T>G]T	16.53	PD47269d	109558667	3449208521	4.7926e-09	83.19
C>A	CCA	C[C>A]A	255.69	PD47269d	75978963	2199002196	1.16276e-07	69.35
C>A	CCC	C[C>A]C	22.23	PD47269d	66714183	3013612648	7.37523e-09	81.32
C>A	CCG	C[C>A]G	11.34	PD47269d	10554350	284689043	3.98366e-08	74
C>A	CCT	C[C>A]T	16.77	PD47269d	75331919	2239786040	7.4863e-09	81.26
C>G	CCA	C[C>G]A	18.86	PD47269d	75978963	2199002196	8.57771e-09	80.67
C>G	CCC	C[C>G]C	14.82	PD47269d	66714183	3013612648	4.91682e-09	83.08
C>G	CCG	C[C>G]G	102.07	PD47269d	10554350	284689043	3.58529e-07	64.45
C>G	CCT	C[C>G]T	9.43	PD47269d	75331919	2239786040	4.21104e-09	83.76
C>T	CCA	C[C>T]A	36.68	PD47269d	75978963	2199002196	1.66789e-08	77.78
C>T	CCC	C[C>T]C	57.62	PD47269d	66714183	3013612648	1.9121e-08	77.18
C>T	CCG	C[C>T]G	71.14	PD47269d	10554350	284689043	2.49884e-07	66.02
C>T	CCT	C[C>T]T	462.16	PD47269d	75331919	2239786040	2.06341e-07	66.85
T>A	CTA	C[T>A]A	92.02	PD47269d	64576402	2573089745	3.57616e-08	74.47
T>A	CTC	C[T>A]C	21.25	PD47269d	84570082	3376908721	6.29336e-09	82.01
T>A	CTG	C[T>A]G	11.49	PD47269d	101444390	3896498704	2.94768e-09	85.31
T>A	CTT	C[T>A]T	16.03	PD47269d	89806628	2977570539	5.38461e-09	82.69
T>C	CTA	C[T>C]A	18.59	PD47269d	64576402	2573089745	7.22456e-09	81.41
T>C	CTC	C[T>C]C	75.77	PD47269d	84570082	3376908721	2.24372e-08	76.49
T>C	CTG	C[T>C]G	27.76	PD47269d	101444390	3896498704	7.12355e-09	81.47
T>C	CTT	C[T>C]T	575.19	PD47269d	89806628	2977570539	1.93173e-07	67.14
T>G	CTA	C[T>G]A	10.22	PD47269d	64576402	2573089745	3.97351e-09	84.01
T>G	CTC	C[T>G]C	9.24	PD47269d	84570082	3376908721	2.73625e-09	85.63
T>G	CTG	C[T>G]G	21.06	PD47269d	101444390	3896498704	5.40407e-09	82.67
T>G	CTT	C[T>G]T	5.01	PD47269d	89806628	2977570539	1.68269e-09	87.74
C>A	GCA	G[C>A]A	66.3	PD47269d	71429444	2241397860	2.95807e-08	75.29
C>A	GCC	G[C>A]C	23.77	PD47269d	49644403	1466410406	1.62104e-08	77.9
C>A	GCG	G[C>A]G	11.75	PD47269d	11477127	342389675	3.43116e-08	74.65
C>A	GCT	G[C>A]T	15.53	PD47269d	68838421	2083656550	7.45319e-09	81.28
C>G	GCA	G[C>G]A	11.63	PD47269d	71429444	2241397860	5.18959e-09	82.85
C>G	GCC	G[C>G]C	129.19	PD47269d	49644403	1466410406	8.81002e-08	70.55
C>G	GCG	G[C>G]G	50.52	PD47269d	11477127	342389675	1.4754e-07	68.31
C>G	GCT	G[C>G]T	23.89	PD47269d	68838421	2083656550	1.14665e-08	79.41
C>T	GCA	G[C>T]A	39.55	PD47269d	71429444	2241397860	1.76446e-08	77.53
C>T	GCC	G[C>T]C	22.74	PD47269d	49644403	1466410406	1.55056e-08	78.1
C>T	GCG	G[C>T]G	113.95	PD47269d	11477127	342389675	3.32822e-07	64.78
C>T	GCT	G[C>T]T	74.07	PD47269d	68838421	2083656550	3.5546e-08	74.49
T>A	GTA	G[T>A]A	90.54	PD47269d	55983518	2144835360	4.22119e-08	73.75
T>A	GTC	G[T>A]C	6.54	PD47269d	47320626	1869651112	3.49567e-09	84.56
T>A	GTG	G[T>A]G	19.42	PD47269d	73478261	2721925426	7.1337e-09	81.47
T>A	GTT	G[T>A]T	10.05	PD47269d	61597473	1915729146	5.24361e-09	82.8
T>C	GTA	G[T>C]A	7.62	PD47269d	55983518	2144835360	3.55469e-09	84.49
T>C	GTC	G[T>C]C	9.34	PD47269d	47320626	1869651112	4.99381e-09	83.02
T>C	GTG	G[T>C]G	25.24	PD47269d	73478261	2721925426	9.27381e-09	80.33
T>C	GTT	G[T>C]T	12.05	PD47269d	61597473	1915729146	6.29234e-09	82.01
T>G	GTA	G[T>G]A	10.48	PD47269d	55983518	2144835360	4.8877e-09	83.11
T>G	GTC	G[T>G]C	8.4	PD47269d	47320626	1869651112	4.49443e-09	83.47
T>G	GTG	G[T>G]G	63.11	PD47269d	73478261	2721925426	2.31845e-08	76.35
T>G	GTT	G[T>G]T	206.93	PD47269d	61597473	1915729146	1.08018e-07	69.67
C>A	TCA	T[C>A]A	73.72	PD47269d	96914806	3072405817	2.39956e-08	76.2
C>A	TCC	T[C>A]C	19.38	PD47269d	62801815	1843296734	1.05153e-08	79.78
C>A	TCG	T[C>A]G	9.32	PD47269d	10695697	326259944	2.85523e-08	75.44
C>A	TCT	T[C>A]T	28.51	PD47269d	105963681	3154949660	9.03544e-09	80.44
C>G	TCA	T[C>G]A	5.76	PD47269d	96914806	3072405817	1.87465e-09	87.27
C>G	TCC	T[C>G]C	6.12	PD47269d	62801815	1843296734	3.32062e-09	84.79
C>G	TCG	T[C>G]G	6.99	PD47269d	10695697	326259944	2.14143e-08	76.69
C>G	TCT	T[C>G]T	20.19	PD47269d	105963681	3154949660	6.4001e-09	81.94
C>T	TCA	T[C>T]A	79.48	PD47269d	96914806	3072405817	2.58702e-08	75.87
C>T	TCC	T[C>T]C	284.62	PD47269d	62801815	1843296734	1.54409e-07	68.11
C>T	TCG	T[C>T]G	69.87	PD47269d	10695697	326259944	2.14143e-07	66.69
C>T	TCT	T[C>T]T	213.8	PD47269d	105963681	3154949660	6.77658e-08	71.69
T>A	TTA	T[T>A]A	328.26	PD47269d	90964800	2945644136	1.1144e-07	69.53
T>A	TTC	T[T>A]C	10.71	PD47269d	86469663	2880005646	3.71705e-09	84.3
T>A	TTG	T[T>A]G	6.93	PD47269d	83511652	2751752697	2.5186e-09	85.99
T>A	TTT	T[T>A]T	49.96	PD47269d	194088261	8558014767	5.83724e-09	82.34
T>C	TTA	T[T>C]A	15.96	PD47269d	90964800	2945644136	5.41956e-09	82.66
T>C	TTC	T[T>C]C	299.74	PD47269d	86469663	2880005646	1.04077e-07	69.83
T>C	TTG	T[T>C]G	10.89	PD47269d	83511652	2751752697	3.9578e-09	84.03
T>C	TTT	T[T>C]T	92.29	PD47269d	194088261	8558014767	1.0784e-08	79.67
T>G	TTA	T[T>G]A	36.92	PD47269d	90964800	2945644136	1.25327e-08	79.02
T>G	TTC	T[T>G]C	7.79	PD47269d	86469663	2880005646	2.70331e-09	85.68
T>G	TTG	T[T>G]G	171.28	PD47269d	83511652	2751752697	6.22454e-08	72.06
T>G	TTT	T[T>G]T	104.99	PD47269d	194088261	8558014767	1.22681e-08	79.11

## Sheet: Table 4
Supplementary Table 4. DToL reference samples
Sample	Species	Common name	DNA source	RNA source	Ploidy	Assembly accession	Number of chromosomes	Total chromosome bases	Number of chromosome gaps	Number of chromosome gap bases	Genome note
bAccGen1	Accipiter gentilis	Northern goshawk	Heart	.	.	GCA_929443795.1	40	1267667460	183	36600	https://doi.org/10.12688/wellcomeopenres.17821.1
bAnaAcu1	Anas acuta	Northern pintail	Muscle	Muscle	.	GCA_963932015.1	39	1137555291	624	124481	https://doi.org/10.12688/wellcomeopenres.22770.1
bAnsBra1	Anser brachyrhynchus	pink-footed goose	Muscle	Muscle	.	GCA_964034855.1	41	1177138686	1124	224800	https://doi.org/10.12688/wellcomeopenres.23194.1
bCinCin1	Cinclus cinclus	white-throated dipper	Blood	Blood	.	GCA_963662255.1	39	1098987775	657	131400	https://doi.org/10.12688/wellcomeopenres.23291.1
bClaHye2	Clangula hyemalis	Long-tailed duck	Muscle	Muscle	.	GCA_963989345.1	41	1146584355	540	107825	https://doi.org/10.12688/wellcomeopenres.22779.1
bFriCoe1	Fringilla coelebs	Chaffinch	Heart	Heart	.	GCA_963513975.1	40	1089746003	566	113200	https://doi.org/10.12688/wellcomeopenres.21279.1
bLarFus1	Larus fuscus	Lesser black-backed gull	Muscle	Muscle	.	GCA_963932225.1	32	1196964088	522	104415	https://doi.org/10.12688/wellcomeopenres.22766.1
bPhaCar2	Phalacrocorax carbo	Great cormorant	.	.	.	GCA_963921805.1	36	1225920693	486	97200	.
bTetUro1	Tetrao urogallus	Western capercaillie	Muscle	.	.	GCA_951394365.1	39	1001056432	963	192600	https://doi.org/10.12688/wellcomeopenres.21261.1
cbCliDend2	Climacium dendroides	Tree-moss	Gametophyte shoot	Gametophyte shoot	1	GCA_950106755.1	11	373232315	72	14400	https://doi.org/10.12688/wellcomeopenres.22450.1
cbIsoMyos1	Isothecium myosuroides	Mouse-tail moss	Gametophyte shoot	Gametophyte shoot	1	GCA_951799445.1	11	380524564	52	10400	https://doi.org/10.12688/wellcomeopenres.22451.1
cbNecPumi1	Neckera pumila	Dwarf neckera	.	.	1	GCA_963969595.1	11	339142157	121	24200	.
cbPolComm4	Polytrichum commune	Common haircap	Leaf	Shoot	1	GCA_950295325.1	7	406102523	75	15000	https://doi.org/10.12688/wellcomeopenres.23368.1
cbPsePuru1	Pseudoscleropodium purum	Neat feathermoss	.	.	1	GCA_963969395.1	11	312038247	54	10800	.
cbRhyLore1	Rhytidiadelphus loreus	Little shaggy-moss	Gametophyte shoot	Gametophyte shoot	1	GCA_947034895.1	5	394803930	33	12600	https://doi.org/10.12688/wellcomeopenres.20994.1
cbThuTama2	Thuidium tamariscinum	Common tamarisk-moss	Gametophyte shoot	Gametophyte shoot	1	GCA_947034885.2	11	362868846	24	9000	https://doi.org/10.12688/wellcomeopenres.22848.1
cmLunCruc20	Lunularia cruciata	Crescent-cup liverwort	Thallus	Thallaus	1	GCA_948567375.1	9	559772751	292	58400	https://doi.org/10.12688/wellcomeopenres.23159.1
daAjuCham1	Ajuga chamaepitys	Yellow bugle	Leaf	Leaf	.	GCA_958295605.1	14	887589564	239	47800	https://doi.org/10.12688/wellcomeopenres.22995.1
daArcMinu1	Arctium minus	Lesser burdock	Leaf	Flower	.	GCA_954870635.1	18	1902128499	14	2800	https://doi.org/10.12688/wellcomeopenres.23160.1
daBalNigr1	Ballota nigra	Black horehound	Leaf	.	.	GCA_947034835.1	11	1186648255	224	69400	https://doi.org/10.12688/wellcomeopenres.19763.1
daCalOffi1	Calendula officinalis	Common marigold	Leaf	Flower	4	GCA_963853835.1	16	1193275114	284	56800	https://doi.org/10.12688/wellcomeopenres.23614.1
daCruLaev1	Cruciata laevipes	Crosswort	.	.	.	GCA_963678965.1	11	296594654	20	4000	.
daEupConf1	Euphrasia confusa	Confused eyebright	Shoot	.	4	GCA_954870475.1	22	921117736	191	40200	https://doi.org/10.12688/wellcomeopenres.23301.1
daGnaUlig1	Gnaphalium uliginosum	.	.	.	.	GCA_963930675.1	7	350320919	102	20400	.
daLigVulg1	Ligustrum vulgare	Wild privet	Leaf	Leaf	.	GCA_963555705.1	23	1380735798	181	36200	https://doi.org/10.12688/wellcomeopenres.24023.1
daLinVulg1	Linaria vulgaris	Common toadflax	Leaf	Flower	.	GCA_948329865.1	6	756312191	88	17600	https://doi.org/10.12688/wellcomeopenres.19661.1
daLogMini1	Logfia minima	.	.	.	4	GCA_963921325.1	15	536356363	431	86200	.
daMisOron1	Misopates orontium	Weasel's snout	Leaf	Leaf	.	GCA_946800315.1	8	359811040	33	6600	https://doi.org/10.12688/wellcomeopenres.20995.1
daPseLute1	Pseudognaphalium luteoalbum	Jersey cudweed	Leaf		.	GCA_963422505.1	7	880318491	425	85200	https://doi.org/10.12688/wellcomeopenres.24144.1
daPulDyse1	Pulicaria dysenterica	Common fleabane	Flower and Leaf	Flower and Leaf	.	GCA_947179395.1	9	830756169	67	13400	https://doi.org/10.12688/wellcomeopenres.20003.1
daScuGale1	Scutellaria galericulata	Marsh skullcap	Leaf	.	.	GCA_946896805.1	15	327661284	27	5400	https://doi.org/10.12688/wellcomeopenres.18983.1
daScuMino1	Scutellaria minor	Lesser Skullcap	Leaf	Leaf	.	GCA_954870855.1	14	339277551	6	1200	https://doi.org/10.12688/wellcomeopenres.21164.1
daSheArve1	Sherardia arvensis	Field madder	Leaf	Leaf	.	GCA_948330725.1	11	440939310	22	4400	https://doi.org/10.12688/wellcomeopenres.21027.1
daSolDulc1	Solanum dulcamara	Bittersweet	Leaf	Leaf	.	GCA_947179165.2	12	941184864	37	13400	https://doi.org/10.12688/wellcomeopenres.20004.1
daVerOffi1	Verbena officinalis	Common vervain	Flower	Leaf	.	GCA_958496215.1	7	289027591	7	1400	https://doi.org/10.12688/wellcomeopenres.23188.1
dcAgrGith1	Agrostemma githago	Corn cockle	Leaf	Leaf	.	GCA_958450325.1	24	1716318042	391	78200	https://doi.org/10.12688/wellcomeopenres.23128.1
dcCheAlbu1	Chenopodium album	Fat-hen	Leaf	Leaf	.	GCA_948465745.1	27	1588183047	67	13226	https://doi.org/10.12688/wellcomeopenres.23015.1
dcFalConv1	Fallopia convolvulus	.	.	.	.	GCA_964016875.1	20	1236807387	493	98600	.
dcPerMacu1	Persicaria maculosa	.	.	.	4	GCA_963922045.1	21	1495755674	46	9200	.
dcPolAvic1	Polygonum aviculare	Common knotgrass	Leaf	Leaf	.	GCA_934048045.1	10	344772133	52	3152	https://doi.org/10.12688/wellcomeopenres.21001.1
dcSalRamo1	Salicornia ramosissima	Purple glasswort	Leaf	.	.	GCA_951394345.1	9	528386091	123	24600	https://doi.org/10.12688/wellcomeopenres.21552.1
dcSpeBocc1	Spergularia bocconei	Greek sea-spurrey	Whole organism	Whole organism	.	GCA_963457585.1	18	465575714	196	39200	https://doi.org/10.12688/wellcomeopenres.23609.1
dcSpeMari1	Spergularia marina	Lesser Sea-spurrey	Whole organism	Whole organism	.	GCA_963680865.1	18	492047008	208	41428	https://doi.org/10.12688/wellcomeopenres.23610.1
ddAraThal4	Arabidopsis thaliana	Thale cress	Leaf	Leaf	.	GCA_933208065.1	5	136757799	37	7400	https://doi.org/10.12688/wellcomeopenres.18665.1
ddBarVulg1	Barbarea vulgaris	Winter cress	Leaf	Leaf	.	GCA_963667165.1	8	245431741	781	156200	https://doi.org/10.12688/wellcomeopenres.24018.1
ddEupLath1	Euphorbia lathyris	.	.	.	.	GCA_963576675.1	10	1019212971	21	4200	.
ddEupPepu3	Euphorbia peplus	Petty spurge	Leaf	.	.	GCA_964200815.1	8	276816529	5	1000	https://doi.org/10.12688/wellcomeopenres.24030.1
ddHibTrid2	Hibiscus tridactylites	.	.	.	.	GCA_958450335.1	28	2547819652	911	182200	.
ddLepDidy1	Lepidium didymum	.	.	.	.	GCA_963920545.1	16	335951277	266	53200	.
ddPopNigr1	Populus nigra	Black poplar	Leaf	Leaf	.	GCA_951802175.1	19	413104843	277	55400	https://doi.org//10.12688/wellcomeopenres.21300.1
ddPriVeri1	Primula veris	Cowslip	Flower	.	.	GCA_963682055.1	12	435420765	196	39200	https://doi.org/10.12688/wellcomeopenres.23212.1
ddSalCapr1	Salix caprea	Goat willow	.	.	.	GCA_964035475.1	19	365398294	170	34000	.
ddSamVale1	Samolus valerandi	Brookweed	.	.	4	GCA_964205165.1	13	503178655	232	46400	.
ddVioOdor1	Viola odorata	Sweet violet	.	.	.	GCA_963691705.1	10	697885628	484	96814	.
dhAlnGlut1	Alnus glutinosa	Common alder	Leaf	Leaf	.	GCA_958979055.1	14	456722532	96	22500	https://doi.org/10.12688/wellcomeopenres.23137.1
dhMyrGale1	Myrica gale	Bog myrtle	.	.	.	GCA_963930655.1	24	643646905	130	26000	.
dhQueCerr2	Quercus cerris	Turkey oak	.	.	.	GCA_963669245.1	12	775752155	364	72625	.
dmBerVulg1	Berberis vulgaris	.	Leaf	.	.	GCA_963556465.1	14	1285247151	721	144200	https://doi.org/10.12688/wellcomeopenres.23427.1
drAceCamp1	Acer campestre	Field maple	Leaf	Leaf	.	GCA_954870605.1	14	556901310	1095	219235	https://doi.org/10.12688/wellcomeopenres.24795.1
drAilAlti1	Ailanthus altissima	Tree of heaven	Leaf	Leaf	.	GCA_946807835.1	31	917886958	12	3000	https://doi.org/10.12688/wellcomeopenres.19628.1
drAstGlyc1	Astragalus glycyphyllos	Liquorice milkvetch	.	.	.	GCA_963573325.1	8	678299607	398	79600	.
drBuxSemp1	Buxus sempervirens	Common box	Leaf	Leaf	.	GCA_947561395.1	14	666109270	397	79228	https://doi.org/10.12688/wellcomeopenres.23267.1
drChaAngu1	Chamaenerion angustifolium	Rosebay willowherb	Leaf	Leaf	.	GCA_946814005.1	18	633522186	22	4700	https://doi.org/10.12688/wellcomeopenres.21163.1
drCraLaev2	Crataegus laevigata	Midland hawthorn	.	.	.	GCA_963580275.1	17	649866712	20	4000	.
drEroMari8	Erodium maritimum	.	.	.	.	GCA_963921825.1	9	761481502	354	70800	.
drEuoEuro1	Euonymus europaeus	.	.	.	4	GCA_963580455.1	16	440150898	35	7000	.
drFilUlma1	Filipendula ulmaria	.	.	.	.	GCA_964200655.1	7	268638811	95	30700	.
drGeuUrba1	Geum urbanum	Wood avens	Leaf	Leaf	.	GCA_946800695.1	21	1304298049	87	17400	https://doi.org/10.12688/wellcomeopenres.19664.1
drHedHeli1	Hedera helix	Common ivy	Leaf	Leaf	.	GCA_947179155.1	24	1196889883	314	72328	https://doi.org/10.12688/wellcomeopenres.19662.1
drHumLupu1	Humulus lupulus	Common hop	Leaf	Leaf	3	GCA_963169125.1	10	2472915281	128	25234	https://doi.org/10.12688/wellcomeopenres.24025.1
drIleAqui2	Ilex aquifolium	English holly	Leaf	.	.	GCA_951799425.1	20	787305792	54	10800	https://doi.org/10.12688/wellcomeopenres.20748.1
drMalDome10	Malus domestica	Apple	Flower and Leaf	Flower and Leaf	.	GCA_916050505.1	17	645430038	8	3700	https://doi.org/10.12688/wellcomeopenres.18646.1
drMalDome11	Malus domestica	Apple	Flower and Leaf	Flower and Leaf	.	GCA_916612005.1	17	650288218	2	400	https://doi.org/10.12688/wellcomeopenres.18646.1
drMalDome5	Malus domestica	Apple	Flower and Leaf	Flower and Leaf	.	GCA_916615385.1	17	645735903	27	8700	https://doi.org/10.12688/wellcomeopenres.18646.1
drMalDome58	Malus domestica	Apple	Flower and Leaf	Flower and Leaf	3	GCA_916615275.1	17	638366891	29	8800	https://doi.org/10.12688/wellcomeopenres.18646.1
drMalRobu1	Malus x robusta	Apple	Leaf	Leaf	.	GCA_963082935.1	17	618150730	129	25800	https://doi.org/10.12688/wellcomeopenres.24268.1
drMalSylv7	Malus sylvestris	Crab apple	Leaf	.	.	GCA_916048215.1	17	639737487	101	39700	https://doi.org/10.12688/wellcomeopenres.18645.1
drMedArab1	Medicago arabica	Spotted medick	Leaf	Leaf	.	GCA_946800305.1	8	511136221	126	39000	https://doi.org/10.12688/wellcomeopenres.20996.1
drMedLupu1	Medicago lupulina	Black medic	Leaf	Leaf	.	GCA_958299785.1	8	570119553	465	93000	https://doi.org/10.12688/wellcomeopenres.23134.1
drParJuda1	Parietaria judaica	Pellitory-of-the-wall	Leaf	Leaf	.	GCA_954871525.1	13	531872878	36	7200	https://doi.org/10.12688/wellcomeopenres.23153.1
drPotAnse1	Potentilla anserina	Silverweed cinquefoil	Leaf	Leaf	.	GCA_933775445.1	7	208315276	7	2900	https://doi.org/10.12688/wellcomeopenres.19908.1
drPotSter1	Potentilla sterilis	Barren strawberry	Leaf	Leaf	.	GCA_963682095.1	14	734553165	531	106200	https://doi.org/10.12688/wellcomeopenres.24145.1
drPruPadu1	Prunus padus	Bird cherry	.	.	.	GCA_964059315.1	16	442493492	207	41400	.
drPyrComm1	Pyrus communis	Pear	Leaf	Leaf	.	GCA_963583255.1	17	484708198	145	29000	https://doi.org/10.12688/wellcomeopenres.23426.1
drTriDubi3	Trifolium dubium	Lesser trefoil or Irish shamrock	Leaf	Leaf	.	GCA_951804385.1	15	676171162	586	117200	https://doi.org/10.12688/wellcomeopenres.21191.1
drTriFrag1	Trifolium fragiferum	Strawberry clover	Leaf	Leaf	.	GCA_954870985.1	8	511654535	201	40200	https://doi.org/10.12688/wellcomeopenres.21162.1
drTriSubt1	Trifolium subterraneum	Subterranean clover	Leaf	Leaf	.	GCA_951799995.1	8	482515690	508	101600	https://doi.org/10.12688/wellcomeopenres.21192.1
drUmbRupe1	Umbilicus rupestris	.	.	.	.	GCA_963678935.1	25	352091723	361	72200	.
drUrtDioi1	Urtica dioica	Stinging nettle	Leaf	Leaf	4	GCA_964188135.1	13	490507826	357	71400	https://doi.org/10.12688/wellcomeopenres.23399.1
drUrtUren1	Urtica urens	Small nettle	Leaf	Leaf	.	GCA_958296335.1	12	326179354	248	52000	https://doi.org/10.12688/wellcomeopenres.23187.1
eaLuiSars1	Luidia sarsii	(a starfish)	Body wall tissue	Body wall tissue	.	GCA_949987565.1	22	465382094	1234	246800	https://doi.org/10.12688/wellcomeopenres.19913.1
eaMarGlac1	Marthasterias glacialis	Spiny starfish	Leg	Leg	.	GCA_911728455.2	22	516080225	466	135000	https://doi.org/10.12688/wellcomeopenres.17344.1
ecAntBifi1	Antedon bifida	Rosy feather star	Whole organism	Whole organism	.	GCA_963402885.1	11	314695108	38	7600	https://doi.org/10.12688/wellcomeopenres.20504.1
fAbrBra2	Abramis brama	Bronze bream	Gill	Spleen	.	GCA_963993115.1	25	1098511232	678	135600	https://doi.org/10.12688/wellcomeopenres.24606.1
fAciRut3	Acipenser ruthenus	.	.	.	.	GCA_902713435.2	60	1812383962	468	93600	.
fBarBab1	Barbus barbus	Barbel	Gonad	Spleen	.	GCA_936440315.1	50	1580796296	107	21400	https://doi.org/10.12688/wellcomeopenres.19332.1
fBarBar1	Barbatula barbatula	Stone loach	Heart	Spleen	.	GCA_947034865.1	25	615896482	824	164800	https://doi.org/10.12688/wellcomeopenres.20293.1
fBleOce1	Blennius ocellaris	Butterfly blenny	Gill	Fin	.	GCA_963422515.1	24	676944351	1530	306000	https://doi.org/10.12688/wellcomeopenres.23748.1
fCarCar2	Carassius carassius	Crucian carp	Spleen	Spleen	.	GCA_963082965.1	50	1657482523	813	162600	https://doi.org/10.12688/wellcomeopenres.24682.1
fCheLab1	Chelon labrosus	Thicklip grey mullet	.	.	.	GCA_963514085.1	24	693205142	580	116000	.
fConCon1	Conger conger	European conger	Gill	Muscle	.	GCA_963514075.1	19	1109016574	996	199200	https://doi.org/10.12688/wellcomeopenres.23052.1
fCycLum2	Cyclopterus lumpus	Lumpfish	.	.	.	GCA_963457625.1	25	580308567	944	188814	.
fDanRer4	Danio rerio	Zebra danio	.	.	.	GCA_944039275.1	25	1411521271	381	122395	https://doi.org/10.12688/wellcomeopenres.24569.1
fEchVip8	Echiichthys vipera	Lesser weever	.	.	.	GCA_963691815.1	25	793869260	604	120800	.
fEutGur1	Eutrigla gurnardus	Grey gurnard	Gill	Gill	.	GCA_963514095.1	24	655567095	550	110000	https://doi.org/10.12688/wellcomeopenres.22453.1
fGobGob1	Gobio gobio	Gudgeon	Spleen	Heart	.	GCA_949357685.1	25	1443453364	1044	208800	https://doi.org/10.12688/wellcomeopenres.22742.1
fGobNig1	Gobius niger	Black goby	Muscle	Muscle	.	GCA_951799975.1	24	853920142	621	124200	https://doi.org/10.12688/wellcomeopenres.21138.1
fHypImm3	Hyperoplus immaculatus	Greater sand-eel	Head	Head	.	GCA_949357725.1	24	727567895	1013	202600	https://doi.org/10.12688/wellcomeopenres.25072.1
fLabBer1	Labrus bergylta	Ballan wrasse	.	.	.	GCA_963930695.1	24	715444298	814	162800	.
fLabMix1	Labrus mixtus	Cuckoo wrasse	.	.	.	GCA_963584025.1	24	697854627	556	111214	https://doi.org/10.12688/wellcomeopenres.23063.1
fLipPho2	Lipophrys pholis	Shanny	.	.	.	GCA_963383615.1	23	718437719	589	117816	.
fMicPou1	Micromesistius poutassou	Blue whiting	.	.	.	GCA_964030765.1	25	461642892	3005	601000	.
fMicVar1	Microchirus variegatus	Thickback sole	Muscle	Muscle	.	GCA_963457635.1	23	692618984	454	90800	https://doi.org/10.12688/wellcomeopenres.21139.1
fPhoGun1	Pholis gunnellus	Rock gunnel	Muscle	Muscle	.	GCA_910591455.2	24	585911863	418	137000	https://doi.org/10.12688/wellcomeopenres.17699.1
fPhoPho1	Phoxinus phoxinus	Eurasian minnow	Spleen	Muscle	.	GCA_949152265.1	25	945221345	880	176000	https://doi.org/10.12688/wellcomeopenres.22867.1
fPlaFle2	Platichthys flesus	European flounder	Muscle	Muscle	.	GCA_949316205.1	24	591959055	482	96400	https://doi.org/10.12688/wellcomeopenres.19909.1
fPlePla1	Pleuronectes platessa	European plaice	Muscle	Muscle		GCA_947347685.1	24	626415731	1071	214200	https://doi.org/10.12688/wellcomeopenres.19397.1
fPolPol2	Pollachius pollachius	Pollack	Gill	Gill	.	GCA_949987615.1	24	626415731	1071	214200	https://doi.org/10.12688/wellcomeopenres.22778.1
fPunPun2	Pungitius pungitius	Ninespine stickleback	Muscle	Muscle	.	GCA_949316345.1	21	465533675	730	146000	https://doi.org/10.12688/wellcomeopenres.20354.1
fRutRut2	Rutilus rutilus	Roach	Spleen	Spleen	.	GCA_951802725.1	25	1095321799	470	94000	https://doi.org/10.12688/wellcomeopenres.25081.1
fSalTru1	Salmo trutta	Brown trout	Spleen	.	.	GCA_901001165.2	40	2169208718	2954	65959842	https://doi.org/10.12688/wellcomeopenres.16838.1
fScoMax1	Scophthalmus maximus	Turbot	Gill	Gill	.	GCA_963854745.1	22	548707424	805	161000	https://doi.org/10.12688/wellcomeopenres.25070.1
fScoSco1	Scomber scombrus	Atlantic mackerel	Gill	Gill	.	GCA_963691925.1	24	732191340	1438	287622	https://doi.org/10.12688/wellcomeopenres.23186.1
fSprSpr1	Sprattus sprattus	European sprat	Gill	Muscle	.	GCA_963457725.1	21	822083191	1476	295226	https://doi.org/10.12688/wellcomeopenres.25097.1
fSquCep2	Squalius cephalus	European chub	Muscle	Muscle	.	GCA_949319135.1	25	1089212783	588	117600	https://doi.org/10.12688/wellcomeopenres.22579.1
fSymMel2	Symphodus melops	Corkwing wrasse	Muscle	Muscle	.	GCA_947650265.1	25	1089212783	588	117600	https://doi.org/10.12688/wellcomeopenres.19398.1
fSynAcu2	Syngnathus acus	Greater pipefish	.	.	.	GCA_948146105.1	22	331461940	95	19000	https://doi.org/10.12688/wellcomeopenres.19528.1
fTauBub2	Taurulus bubalis	Long-spined sea scorpion	Muscle	Fin	.	GCA_910589615.1	21	614935197	242	77100	https://doi.org/10.12688/wellcomeopenres.17356.1
fTelBon1	Telmatherina bonti	.	.	.	.	GCA_933228915.1	24	981814700	1329	265800	.
fThuMac1	Thunnus maccoyii	Southern bluefin tuna	.	.	.	GCA_910596095.1	24	777694220	88	28000	.
fTraTra1	Trachurus trachurus	Atlantic horse mackerel	Muscle	.	.	GCA_905171665.1	24	790723879	208	26447	https://doi.org/10.12688/wellcomeopenres.17813.1
fZeuFab8	Zeus faber	John dory	.	.	.	GCA_960531495.1	22	781287666	887	177400	https://doi.org/10.12688/wellcomeopenres.21140.1
gfAgaBisp1	Agaricus bisporus	Cultivated mushroom	.	.	.	GCA_943193715.1	13	30321411	19	3800	https://doi.org/10.12688/wellcomeopenres.23199.1
gfClaFumo1	Clavaria fumosa	Cmoky spindles	.	.	.	GCA_951802425.1	13	48281665	5	1000	.
gfFlaVelt1	Flammulina velutipes	Velvet shank	Mycelium	Mycelium	.	GCA_945909995.2	12	37254497	155	31000	https://doi.org/10.12688/wellcomeopenres.19577.1
gfLaeSulp1	Laetiporus sulphureus	Chicken of the woods	Mycelium	.	.	GCA_927399515.1	14	37410216	3	600	https://doi.org/10.12688/wellcomeopenres.17750.1
gfPleOstr1	Pleurotus ostreatus	Oyster mushroom	Mycelium	.	.	GCA_947034855.1	12	40426685	1	200	https://doi.org/10.12688/wellcomeopenres.19578.1
gfPorCaly1	Porpolomopsis calyptriformis	.	.	.	.	GCA_951640195.1	14	33129630	26	5200	.
glLicPygm2	Lichina pygmaea	Black lichen	.	.	.	GCA_963422465.1	7	32421062	46	9200	.
grCorFumo1	Cordyceps fumosorosea	.	.	.	.	GCA_963580265.1	9	34324099	23	4600	.
grSimLame1	Simplicillium lamellicola	.	.	.	.	GCA_964211815.1	7	28706920	7	1400	.
grTriPseu1	Trichoderma pseudokoningii	.	.	.	.	GCA_943193705.1	7	32931900	2	400	.
gsMetZobe1	Metschnikowia zobellii	(a marine yeast)	A colony of cells	.	.	GCA_939531405.1	5	13602261	1	32	https://doi.org/10.12688/wellcomeopenres.19998.1
gzEntParv1	Entomortierella parvispora	.	.	.	.	GCA_963573315.1	14	38486553	10	2000	.
gzMucPiri1	Mucor piriformis	Plant pathogen	Mycelium	Mycelium	.	GCA_943193625.1	6	34828372	1	200	https://doi.org/10.12688/wellcomeopenres.23606.1
iHemFuc1	Hemaris fuciformis	broad-bordered bee hawk-moth	.	.	.	GCA_907164795.1	30	448729036	44	14329	.
icAdaBipu1	Adalia bipunctata	2-spot ladybird	Whole organism	.	.	GCA_910592335.1	11	449491743	86	20439	https://doi.org/10.12688/wellcomeopenres.18610.1
icAgoFuli1	Agonum fuliginosum	Ground beetle	Head and thorax	.	.	GCA_947534325.1	19	674904268	145	29000	https://doi.org/10.12688/wellcomeopenres.20912.1
icAgrCyan1	Agrilus cyanescens	Metallic wood boring beetle	Whole organism	.	.	GCA_947389935.1	11	314695108	38	7600	https://doi.org/10.12688/wellcomeopenres.20877.1
icAgrMuri1	Agrypnus murinus	Click beetle	Abdomen	.	.	GCA_929113105.1	9	1571590911	825	165000	https://doi.org/10.12688/wellcomeopenres.19847.1
icAnaMacu3	Anaspis maculata	False flower beetle	Whole organism	.	.	GCA_949128115.1	8	752697178	183	36600	https://doi.org/10.12688/wellcomeopenres.21283.1
icApoCory1	Apoderus coryli	Hazel leaf-roller	Whole organism	.	.	GCA_911728435.1	20	422407043	69	14600	https://doi.org/10.12688/wellcomeopenres.17380.1
icCanRufa1	Cantharis rufa	Soldier beetle	Thorax	.	.	GCA_947369205.1	7	354985643	67	13600	https://doi.org/10.12688/wellcomeopenres.19986.1
icCanRust1	Cantharis rustica	Sailor beetle	Thorax	.	.	GCA_911387805.1	7	444627916	57	14400	https://doi.org/10.12688/wellcomeopenres.17363.1
icCetAura1	Cetonia aurata	Rose chafer	Thorax	Abdomen	.	GCA_949128085.1	11	469104153	82	16400	https://doi.org/10.12688/wellcomeopenres.20412.1
icChrOric1	Chrysolina oricalcia	Cow parsley leaf beetle	Abdomen	.	.	GCA_944452925.1	22	1422628701	517	103400	https://doi.org/10.12688/wellcomeopenres.19985.1
icCocSept1	Coccinella septempunctata	Seven-spotted ladybird	Whole organism	.	.	GCA_907165205.1	10	398192398	85	23593	https://doi.org/10.12688/wellcomeopenres.17346.1
icCryMora2	Cryptocephalus moraei	Leaf beetle	Whole organism	.	.	GCA_946251905.1	15	491875392	119	24000	https://doi.org/10.12688/wellcomeopenres.19522.1
icElmAene2	Elmis aenea	Riffle beetle	Whole organism	.	.	GCA_947652605.1	9	492280590	847	169600	https://doi.org/10.12688/wellcomeopenres.19778.1
icHalSede1	Halyzia sedecimguttata	Orange ladybird	Whole organism	Abdomen	.	GCA_937662695.1	10	901090794	215	43007	https://doi.org/10.12688/wellcomeopenres.19369.1
icHarAxyr1	Harmonia axyridis	Harlequin	Whole organism	.	.	GCA_914767665.1	8	425274714	172	37100	https://doi.org/10.12688/wellcomeopenres.17349.1
icLagHirt1	Lagria hirta	Darkling beetle	Whole organism	.	.	GCA_947359425.1	12	335467320	113	22600	https://doi.org/10.12688/wellcomeopenres.20232.1
icLeiSpin1	Leistus spinibarbis	Ground beetle	Abdomen	.	.	GCA_933228885.1	23	227183333	29	5800	https://doi.org/10.12688/wellcomeopenres.19997.1
icLepMacu1	Rutpela maculata	Longhorn beetle	Throax	Abdomen	.	GCA_936432065.1	10	2002014795	872	174231	https://doi.org/10.12688/wellcomeopenres.20500.1
icLocCapr1	Lochmaea capreae	Willow leaf beetle	Abdomen	Leg	.	GCA_949126875.1	17	534180827	73	14600	https://doi.org/10.12688/wellcomeopenres.22424.1
icLocCrat2	Lochmaea crataegi	Hawthorn leaf beetle	Whole organism	.	.	GCA_947563755.1	16	876408049	596	119200	https://doi.org/10.12688/wellcomeopenres.20911.1
icMalBipu1	Malachius bipustulatus	Common malachite beetle	Whole organism	.	.	GCA_910589415.1	16	876408049	596	119200	https://doi.org/10.12688/wellcomeopenres.17381.1
icMelMelo1	Melolontha melolontha	Cockchafer	Thorax	Abdomen	.	GCA_935421215.1	10	1646642359	508	101600	https://doi.org/10.12688/wellcomeopenres.19434.1
icNebBrev1	Nebria brevicollis	Ground beetle	Head and Thorax	.	.	GCA_944738965.1	15	208173776	339	67457	https://doi.org/10.12688/wellcomeopenres.18749.1
icNebSali1	Nebria salina	Carabid beetle	Thorax	.	.	GCA_944039245.1	21	206921118	129	31630	https://doi.org/10.12688/wellcomeopenres.19372.1
icOcyOlen1	Ocypus olens	Devil's coach horse	Whole organism	.	.	GCA_910593695.1	19	1070483798	544	144800	https://doi.org/10.12688/wellcomeopenres.17342.1
icOphArdo1	Ophonus ardosiacus	Ground beetle	Abdomen	.	.	GCA_943142095.1	19	908246236	224	44800	https://doi.org/10.12688/wellcomeopenres.19849.1
icPhiCogn1	Philonthus cognatus	Rove beetle	Abodmen	Thorax	.	GCA_932526585.1	12	1014573488	83	16600	https://doi.org/10.12688/wellcomeopenres.19336.1
icPodAlpi1	Podabrus alpinus	Solider beetle	Whole organism	.	.	GCA_932274525.1	19	1070483798	544	144800	https://doi.org/10.12688/wellcomeopenres.18890.1
icPolCerv1	Polydrusus cervinus	Weevil	Abdomen	.	.	GCA_935413205.1	11	713293779	60	12000	https://doi.org/10.12688/wellcomeopenres.20414.1
icPteMadi1	Pterostichus madidus	Black clock beetle	Head and Thorax	.	.	GCA_911728475.1	19	704920005	156	38581	https://doi.org/10.12688/wellcomeopenres.17347.1
icPteNige1	Pterostichus niger	Ground beetle	Thorax	Abdomen	.	GCA_947425015.1	19	654122297	417	83400	https://doi.org/10.12688/wellcomeopenres.20418.1
icPyrSerr1	Pyrochroa serraticornis	Red-headed cardinal beetle	Thorax	.	.	GCA_905333025.2	10	244215905	38	10900	https://doi.org/10.12688/wellcomeopenres.17362.1
icRhaFulv1	Rhagonycha fulva	Common red soldier beetle	Whole organism	.	.	GCA_905340355.1	7	424519277	69	15600	https://doi.org/10.12688/wellcomeopenres.17198.1
icSilAtra2	Silpha atrata	Black snail beetle			.	GCA_944588485.1	18	1146593402	1074	214800	https://doi.org/10.12688/wellcomeopenres.20340.1
idAcrOrbc1	Acrocera orbiculus	Top-horned hunchback	Whole organism	Whole organism	.	GCA_947359355.1	5	214884321	2	400	https://doi.org/10.12688/wellcomeopenres.20891.1
idBacElon1	Baccha elongata	Gossamer hoverfly	Whole organism	Whole organism	.	GCA_951217065.1	3	441011861	147	29227	https://doi.org/10.12688/wellcomeopenres.24610.1
idBelPand1	Bellardia pandia	Bisetose emerald-bottle	Whole organism	.	.	GCA_916048285.1	7	424519277	69	15600	https://doi.org/10.12688/wellcomeopenres.17492.1
idBerChal2	Beris chalybata	Yellow-legged black legionnaire	Whole organism	Whole organism	.	GCA_949128065.1	6	540369503	99	19800	https://doi.org/10.12688/wellcomeopenres.21159.1
idBibMarc1	Bibio marci	St. Mark's fly	Abdomen	.	.	GCA_910594885.2	6	340009463	18	5700	https://doi.org/10.12688/wellcomeopenres.17265.1
idBleFall4	Blera fallax	Pine hoverfly	Whole organism	.	.	GCA_946965025.1	7	424519277	69	15600	https://doi.org/10.12688/wellcomeopenres.19034.1
idBomDisc1	Bombylius discolor	Dotted bee fly	.	Abdomen	.	GCA_939192795.1	6	279505365	64	12800	https://doi.org/10.12688/wellcomeopenres.18614.1
idBomMajo1	Bombylius major	Dark edged bee fly	Thorax	Abdomen	.	GCA_932526495.1	7	295820183	109	21800	https://doi.org/10.12688/wellcomeopenres.19804.1
idBraLaph1	Brachypalpus laphriformis	Forest hoverfly	Thorax	Abdomen	.	GCA_945910035.1	7	295820183	109	21800	https://doi.org/10.12688/wellcomeopenres.20885.1
idCalVomi1	Calliphora vomitoria	Bluebottle	Thorax	.	.	GCA_942486065.1	6	700219662	189	37800	https://doi.org/10.12688/wellcomeopenres.18891.1
idCheImpr3	Cheilosia impressa	Hoverfly	Thorax	.	.	GCA_948293265.1	6	382003934	83	16600	https://doi.org/10.12688/wellcomeopenres.20624.1
idChePaga1	Cheilosia pagana	Parsley Cheilosia	Whole organism	.	.	GCA_936431705.1	7	424519277	69	15600	https://doi.org/10.12688/wellcomeopenres.20627.1
idCheUrba1	Cheilosia urbana	Hawkweed Cheilosia	Whole organism	.	.	GCA_946477585.1	7	424519277	69	15600	https://doi.org/10.12688/wellcomeopenres.19569.1
idCheVern2	Cheilosia vernalis	Yarrow Cheilosia	Head and thorax	.	.	GCA_949126925.1	6	431777128	70	14000	https://doi.org/10.12688/wellcomeopenres.21219.1
idCheVulp2	Cheilosia vulpina	Large burdock Cheilosia	Abdomen	.	.	GCA_916610125.1	6	404629009	10	2900	https://doi.org/10.12688/wellcomeopenres.17491.1
idChrBici1	Chrysotoxum bicinctum	Two-banded wasp hoverfly	Whole organism	.	.	GCA_911387755.1	5	901326997	318	100113	https://doi.org/10.12688/wellcomeopenres.17382.1
idCisGlob1	Cistogaster globosa	Tachinid fly	Whole organism	.	.	GCA_937654795.1	5	901326997	318	100113	https://doi.org/10.12688/wellcomeopenres.19924.1
idCluTigr1	Clusia tigrina	Druid fly	Whole organism	.	.	GCA_920105625.1	5	901326997	318	100113	https://doi.org/10.12688/wellcomeopenres.20109.1
idCoePili4	Coelopa pilipes	Kelp fly	Whole organism	.	.	GCA_947389925.1	5	901326997	318	100113	https://doi.org/10.12688/wellcomeopenres.21222.1
idCorMarg1	Coremacera marginata	Snail-killing fly	Throax	Abdomen	.	GCA_914767935.1	6	978168602	829	279800	https://doi.org/10.12688/wellcomeopenres.17482.1
idCriBerb1	Criorhina berberina	Dimorphic bear hoverfly	Abdomen	.	.	GCA_917880715.1	4	409247771	35	10900	https://doi.org/10.12688/wellcomeopenres.18705.1
idDasAlbo1	Dasysyrphus albostriatus	Stripe-backed Dasysyrphus	Throax	Abdomen	.	GCA_946251815.1	6	978168602	829	279800	https://doi.org/10.12688/wellcomeopenres.20887.1
idEpiBalt1	Episyrphus balteatus	Marmalade hoverfly	Whole organism	Whole organism	.	GCA_945859705.1	5	533733621	168	33600	https://doi.org/10.12688/wellcomeopenres.19073.1
idEpiEuco1	Epistrophella euchroma	Hoverfly	Whole organism	.	.	GCA_947049315.1	5	901326997	318	100113	https://doi.org/10.12688/wellcomeopenres.19622.1
idEpiGros1	Epistrophe grossulariae	Broad-banded epistrophe	Abdomen	Abdomen		GCA_929447395.1	5	553719552	340	110900	https://doi.org/10.12688/wellcomeopenres.19665.1
idEpiSucc1	Epicampocera succincta	Tachinid fly	Whole organism	.	.	GCA_932526305.1	5	901326997	318	100113	https://doi.org/10.12688/wellcomeopenres.19586.1
idEriArbu1	Eristalis arbustorum	Plane-faced dronefly	Whole organism	.	.	GCA_916610145.1	5	901326997	318	100113	https://doi.org/10.12688/wellcomeopenres.17580.1
idEriPert2	Eristalis pertinax	Tapered dronefly	Head and thorax	Abdomen	.	GCA_907269125.1	7	455922914	316	111800	https://doi.org/10.12688/wellcomeopenres.17267.1
idEriSepu1	Eristalinus sepulchralis	Small spotty-eyed dronefly	Abdomen	Thorax	.	GCA_944738645.1	6	373721851	310	62000	https://doi.org/10.12688/wellcomeopenres.19587.1
idEriTena2	Eristalis tenax	The dronefly	Whole organism	.	.	GCA_905231855.1	5	901326997	318	100113	https://doi.org/10.12688/wellcomeopenres.17357.1
idEupCoro1	Eupeodes corollae	Vagrant hoverfly	Whole organism	.	.	GCA_945859685.1	5	901326997	318	100113	https://doi.org/10.12688/wellcomeopenres.19099.1
idEupLati1	Eupeodes latifasciatus	Meadow field syrph	Thorax	Abdomen	.	GCA_920104205.1	4	818510109	794	286200	https://doi.org/10.12688/wellcomeopenres.18113.1
idGymRotn1	Gymnosoma rotundatum	Parasitoid ladybird fly	Thorax	.	.	GCA_916610165.1	6	756257083	226	66500	https://doi.org/10.12688/wellcomeopenres.17782.1
idLeuLate1	Leucozona laternaria	Dark-saddled leucozona	Thorax	.	.	GCA_932273885.1	6	756257083	226	66500	https://doi.org/10.12688/wellcomeopenres.18661.1
idLypDubi1	Lypha dubia	Tachinid fly	Whole organism	.	.	GCA_947311025.1	5	901326997	318	100113	https://doi.org/10.12688/wellcomeopenres.21295.1
idMacAtri3	Machimus atricapillus	Kite-tailed Robberfly	Abdomen	Head and thorax	.	GCA_933228815.1	6	264848469	20	4000	https://doi.org/10.12688/wellcomeopenres.19080.1
idMelAuri2	Meliscaeva auricollis	Spotted Meliscaeva	Thorax	Thorax	.	GCA_948107695.1	5	379057608	164	32800	https://doi.org/10.12688/wellcomeopenres.20843.1
idMelMell2	Melanostoma mellinum	Dumpy grass hoverfly	Head and thorax	.	.	GCA_914767635.1	5	727085595	402	125431	https://doi.org/10.12688/wellcomeopenres.17615.1
idMyaFlor2	Myathropa florea	Batman hoverfly	Head and thorax	.	.	GCA_930367185.1	5	727085595	402	125431	https://doi.org/10.12688/wellcomeopenres.20139.1
idMyoTess1	Myopa tessellatipennis	Thick-headed fly	Abdomen	Whole organism	.	GCA_943737955.1	4	249243465	13	2600	https://doi.org/10.12688/wellcomeopenres.19108.1
idNemNigr1	Nemotelus nigrinus	Soldierfly	Whole organism	.	.	GCA_947369275.1	5	708572427	2853	570417	https://doi.org/10.12688/wellcomeopenres.19534.1
idNeoCyan1	Neoitamus cyanurus	Common awl robberfly	Head	.	.	GCA_947538895.1	10	365364221	78	15600	https://doi.org/10.12688/wellcomeopenres.22253.1
idNeoInte1	Neoascia interrupta	Bulrush Neoascia	Whole organism	.	.	GCA_947623515.1	4	596526585	333	66600	https://doi.org/10.12688/wellcomeopenres.20353.1
idNepAppe1	Nephrotoma appendiculata	Spotted cranefly	Head and thorax	Abdomen	.	GCA_947310385.1	4	1096929967	674	134800	https://doi.org/10.12688/wellcomeopenres.20886.1
idNepFlae1	Nephrotoma flavescens	Cranefly	Head and thorax	Abdomen	.	GCA_932526605.1	4	955807611	921	184200	https://doi.org/10.12688/wellcomeopenres.19203.1
idNepScut1	Nephrocerus scutellatus	Pipunculid fly	Thorax	Abdomen	.	GCA_947095585.1	6	613321903	258	51600	https://doi.org/10.12688/wellcomeopenres.20677.1
idNowFero1	Nowickia ferox	Tachinid fly	Thorax	.	.	GCA_936439885.1	6	628858877	138	27600	https://doi.org/10.12688/wellcomeopenres.19575.1
idPheCory1	Pherbina coryleti	Snail-killing fly	Whole organism	.	.	GCA_943735915.1	4	596526585	333	66600	https://doi.org/10.12688/wellcomeopenres.18790.1
idPhyMeln1	Phyto melanocephala	Woodlouse fly	Thorax	Abdomen	.	GCA_941918925.1	6	739693557	185	37000	https://doi.org/10.12688/wellcomeopenres.19563.1
idPlaAlba1	Platycheirus albimanus	White-footed hoverfly	Head and thorax	Head and thorax	.	GCA_916050605.1	4	674416912	596	178000	https://doi.org/10.12688/wellcomeopenres.20494.1
idPoeNobi2	Poecilobothrus nobilitatus	Semaphore fly	Whole organism	Abdomen	.	GCA_947095535.1	5	938115006	792	158400	https://doi.org/10.12688/wellcomeopenres.20947.1
idPolAmen1	Pollenia amentaria	Black-bellied clusterfly	Thorax	Whole organism	.	GCA_943735925.1	6	1268449752	205	41000	https://doi.org/10.12688/wellcomeopenres.19740.1
idPolAngu1	Pollenia angustigena	Narrow-cheeked clusterfly	Thorax	Abdomen	.	GCA_930367215.1	6	1361981308	110	42700	https://doi.org/10.12688/wellcomeopenres.19576.1
idPolDomi1	Polietes domitor	Muscid fly	Whole organism	.	.	GCA_947397865.1	6	997245829	1636	327200	https://doi.org/10.12688/wellcomeopenres.20648.1
idProAzur1	Protocalliphora azurea	Bird blowfly	Thorax	Abdomen	.	GCA_932274085.1	7	873782523	387	77400	https://doi.org/10.12688/wellcomeopenres.18872.1
idRhiCamp1	Rhingia campestris	Common snout-hoverfly	Head and thorax	Abdomen	.	GCA_932526625.1	5	695029866	263	52426	https://doi.org/10.12688/wellcomeopenres.19036.1
idSarCaer1	Sarcophaga caerulescens	Bluish flesh fly	Thorax	Abdomen	.	GCA_927399465.1	7	591299335	449	89800	https://doi.org/10.12688/wellcomeopenres.18718.1
idSarRose1	Sarcophaga rosellei	Roselle's flesh fly	Thorax	Abdomen	.	GCA_930367235.1	6	528836614	32	11800	https://doi.org/10.12688/wellcomeopenres.18874.1
idSarSubv1	Sarcophaga subvicina	Lesser worm flesh fly	Thorax	.	.	GCA_936449025.1	7	699539660	455	118000	https://doi.org/10.12688/wellcomeopenres.18717.2
idSarVari1	Sarcophaga variegata	Variegated flesh fly	Thorax	.	.	GCA_932273835.1	7	699539660	455	118000	https://doi.org/10.12688/wellcomeopenres.19483.1
idScaPyra1	Scaeva pyrastri	Pied hoverfly	Head and thorax	Thorax	.	GCA_905146935.1	4	320029822	179	58500	https://doi.org/10.12688/wellcomeopenres.18892.1
idSicFerr1	Sicus ferrugineus	Ferruginous bee-grabber	Abdomen and thorax	.	.	GCA_922984085.1	7	310779441	102	27000	https://doi.org/10.12688/wellcomeopenres.17748.1
idSphTaen1	Sphaerophoria taeniata	Hoverfly	Abdomen and thorax	.	.	GCA_943590905.1	5	608520619	180	36000	https://doi.org/10.12688/wellcomeopenres.19921.1
idStoLuna1	Stomorhina lunata	Locust fly	Thorax	Abdomen	.	GCA_933228675.1	6	721923177	647	129400	https://doi.org/10.12688/wellcomeopenres.19532.1
idSuiVari3	Suillia variegata	Heleomyzid fly	Whole organism	.	.	GCA_949127995.1	7	261664681	151	30200	https://doi.org/10.12688/wellcomeopenres.19630.1
idSyrPipi1	Syritta pipiens	Thick-legged hoverfly	Head and thorax	Thorax	.	GCA_905187475.1	5	318451763	16	3817	https://doi.org/10.12688/wellcomeopenres.19848.1
idTacFera2	Tachina fera	Tachinid fly	Head and thorax	Abdomen	.	GCA_905220375.1	6	751606852	310	94000	https://doi.org/10.12688/wellcomeopenres.17760.1
idTacLuri1	Tachina lurida	Tachinid fly	Thorax	Abdomen	.	GCA_944452675.1	6	889498021	503	100600	https://doi.org/10.12688/wellcomeopenres.19635.1
idTheAcut1	Thecocarcelia acutangulata	Tachinid fly	Thorax	.	.	GCA_914767995.1	6	688908432	46	14000	https://doi.org/10.12688/wellcomeopenres.18994.1
idTheAtra2	Thecophora atra	Conopid fly	Head	Whole organism	.	GCA_937620795.1	5	317771013	71	14200	https://doi.org/10.12688/wellcomeopenres.19902.1
idTheSoli1	Thelaira solivaga	Tachinid fly	Head and thorax	.	.	GCA_947397855.1	7	428796530	190	38000	https://doi.org/10.12688/wellcomeopenres.19639.1
idVolBomb1	Volucella bombylans	Bumblebee hoverfly	Abdomen	Abdomen	.	GCA_949129095.1	6	1194138480	893	178600	https://doi.org/10.12688/wellcomeopenres.22843.1
idVolInan1	Volucella inanis	Lesser hornet hoverfly	Head and thorax	Thorax	.	GCA_907269105.1	6	958925804	353	104500	https://doi.org/10.12688/wellcomeopenres.18897.1
idVolInfl1	Volucella inflata	Cossus hoverfly	Abdomen	Thorax	.	GCA_928272305.1	6	753274378	266	53200	https://doi.org/10.12688/wellcomeopenres.19845.1
idXanPedi1	Xanthogramma pedissequum	Hoverfly	Thorax	.	.	GCA_910595825.1	6	933366346	466	131022	https://doi.org/10.12688/wellcomeopenres.17559.1
idXylSylv2	Xylota sylvarum	Golden-tailed Leafwalker	Thorax	Head and thorax	.	GCA_905220385.1	5	459999375	55	14300	https://doi.org/10.12688/wellcomeopenres.19241.1
ihAcaHaem1	Acanthosoma haemorrhoidale	Hawthorn shieldbug	Abdomen	.	.	GCA_930367205.1	7	847965711	471	176236	https://doi.org/10.12688/wellcomeopenres.17926.1
ihAelAcum1	Aelia acuminata	Bishop's mitre shieldbug	Head and thorax	.	.	GCA_911387785.1	8	1144246757	575	235600	https://doi.org/10.12688/wellcomeopenres.17400.1
ihDrePlat2	Drepanosiphum platanoidis	Common sycamore aphid	Whole organism	.	.	GCA_948098885.1	15	283776173	687	137400	https://doi.org/10.12688/wellcomeopenres.20169.1
ihGonAcut1	Gonocerus acuteangulatus	Box bug	Thorax	.	.	GCA_946811695.1	10	1102163799	1697	339064	https://doi.org/10.12688/wellcomeopenres.20496.1
ihRhaNebu1	Rhaphigaster nebulosa	Mottled shieldbug	Thorax	.	.	GCA_948150685.1	7	1153073545	1154	230800	https://doi.org/10.12688/wellcomeopenres.19844.1
iiAthCine2	Athripsodes cinereus	Brown silverhorn	Whole organism	.	.	GCA_947579605.1	15	283776173	687	137400	https://doi.org/10.12688/wellcomeopenres.19765.1
iiGlyPell1	Glyphotaelius pellucidus	Mottled Sedge	Whole organism	Whole organism	.	GCA_936435175.1	30	1036611868	228	45600	https://doi.org/10.12688/wellcomeopenres.19076.1
iiLimLuna2	Limnephilus lunatus	Caddisfly	Whole organism	Whole organism	.	GCA_917563855.1	13	1254937204	100	38000	https://doi.org/10.12688/wellcomeopenres.18752.1
iiLimMarm1	Limnephilus marmoratus	Cinnamon sedge caddisfly	Whole organism	Whole organism	.	GCA_917880885.1	30	1628920020	327	118500	https://doi.org/10.12688/wellcomeopenres.18753.1
iiLimRhom1	Limnephilus rhombicus	Caddisfly	Abdomen	.	.	GCA_929108145.1	30	1572227076	207	41400	https://doi.org/10.12688/wellcomeopenres.19331.1
ilAbrTril1	Abrostola triplasia	Dark spectacle	Head and thorax	Abdomen	.	GCA_946251915.1	31	362575416	3	600	https://doi.org/10.12688/wellcomeopenres.19624.1
ilAbrTrip1	Abrostola tripartita	The spectacle	Thorax	Abdomen	.	GCA_905340225.1	31	381012071	2	300	https://doi.org/10.12688/wellcomeopenres.17355.1
ilAceEphe1	Acentria ephemerella	Water veneer	Whole organism	Whole organism	.	GCA_943193645.1	31	340499755	2	400	https://doi.org/10.12688/wellcomeopenres.21099.1
ilAchFlav2	Achlya flavicornis	Yellow horned	Head and thorax	.	.	GCA_947623365.1	30	444520492	31	6200	https://doi.org/10.12688/wellcomeopenres.19846.1
ilAclCris2	Acleris cristana	Tufted button	Whole organism	.	.	GCA_948252455.1	31	561009414	111	22200	https://doi.org/10.12688/wellcomeopenres.19508.1
ilAclEmar1	Acleris emargana	Notch-wing button	Whole organism	.	.	GCA_927399475.1	31	561009414	111	22200	https://doi.org/10.12688/wellcomeopenres.19843.1
ilAclLite1	Acleris literana	Lichen button	Whole organism	.	.	GCA_946894065.1	31	561009414	111	22200	https://doi.org/10.12688/wellcomeopenres.19481.1
ilAclSpar1	Acleris sparsana	Ashy button	Whole organism	Whole organism	.	GCA_923062465.1	30	589482501	8	2800	https://doi.org/10.12688/wellcomeopenres.19533.1
ilAcrAcer1	Acronicta aceris	The sycamore	Abdomen	.	.	GCA_910591435.1	32	466369003	13	3200	https://doi.org/10.12688/wellcomeopenres.17354.1
ilAcrLepo1	Acronicta leporina	The miller	Thorax	.	.	GCA_947256265.1	32	465501737	38	7600	https://doi.org/10.12688/wellcomeopenres.18889.1
ilAcrPsix1	Acronicta psi	Grey Dagger	Thorax	.	.	GCA_946251955.1	32	465501737	38	7600	https://doi.org/10.12688/wellcomeopenres.18711.1
ilAcrSuav1	Acrobasis suavella	Thicket knot-horn	Whole organism	Whole organism	.	GCA_943193695.1	30	647252360	23	4600	https://doi.org/10.12688/wellcomeopenres.19506.1
ilAglIoxx1	Inachis io	European peacock	Whole organism	.	.	GCA_905147045.1	31	561009414	111	22200	https://doi.org/10.12688/wellcomeopenres.17204.1
ilAglUrti1	Aglais urticae	Small tortoiseshell	Whole organism	.	.	GCA_905147175.2	31	561009414	111	22200	https://doi.org/10.12688/wellcomeopenres.17197.1
ilAgoAren1	Agonopterix arenella	Brindled flat-body	Whole organism	.	.	GCA_927399405.1	31	561009414	111	22200	https://doi.org/10.12688/wellcomeopenres.19252.1
ilAgoSubp1	Agonopterix subpropinquella	Ruddy flat-body	Whole organism	.	.	GCA_922987775.1	31	561009414	111	22200	https://doi.org/10.12688/wellcomeopenres.20170.1
ilAgrAura1	Agriopis aurantiaria	Scarce umber	Thorax	Abdomen	.	GCA_914767915.1	30	485369969	35	10900	https://doi.org/10.12688/wellcomeopenres.19922.1
ilAgrCirc1	Agrochola circellaris	The brick	Thorax	Abdomen	.	GCA_914767755.1	30	485369969	35	10900	https://doi.org/10.12688/wellcomeopenres.18894.1
ilAgrLeuc1	Agriopis leucophaearia	Spring usher	Abdomen	.	.	GCA_949125355.1	31	490953744	56	11200	https://doi.org/10.12688/wellcomeopenres.22861.1
ilAgrLota1	Agrochola lota	Red-line quaker	Head and thorax	.	.	GCA_947364205.1	31	636468558	59	11800	https://doi.org/10.12688/wellcomeopenres.19285.1
ilAgrMaci1	Agrochola macilenta	Yellow-line quaker	Thorax	Abdomen	.	GCA_916701695.1	32	683094442	30	9600	https://doi.org/10.12688/wellcomeopenres.18912.1
ilAgrMarg1	Agriopis marginaria	Dotted border	Abdomen	Abdomen	.	GCA_932305915.1	29	500852740	21	4200	https://doi.org/10.12688/wellcomeopenres.19284.1
ilAgrPuta1	Agrotis puta	Shuttle-shaped dart	Abdomen	Thorax	.	GCA_943136025.1	31	523219247	37	7400	https://doi.org/10.12688/wellcomeopenres.18934.1
ilAgrTris1	Agriphila tristella	Common grass-veneer	Thorax	.	.	GCA_928269145.1	23	798553080	87	17400	https://doi.org/10.12688/wellcomeopenres.18568.1
ilAlcRepa2	Alcis repandata	Mottled beauty moth	Head and thorax	Abdomen	.	GCA_949125135.1	32	395751095	70	14000	https://doi.org/10.12688/wellcomeopenres.22886.1
ilAllOxya1	Allophyes oxyacanthae	Green-brindled crescent	Thorax	.	.	GCA_932294325.1	23	798553080	87	17400	https://doi.org/10.12688/wellcomeopenres.18935.1
ilAlsAesc1	Alsophila aescularia	March moth	Thorax	Abdomen	.	GCA_946251855.1	14	901004774	111	22200	https://doi.org/10.12688/wellcomeopenres.20650.1
ilAmpBerb1	Amphipyra berbera	Svensson's copper underwing	Abdomen	.	.	GCA_910594945.1	31	582189925	6	1200	https://doi.org/10.12688/wellcomeopenres.17350.1
ilAmpLuce6	Amphipoea lucens	Large ear	Head and thorax	.	.	GCA_947508005.1	31	647015338	66	13200	https://doi.org/10.12688/wellcomeopenres.19287.1
ilAmpOcul1	Amphipoea oculea	Ear moth	Thorax	Abdomen	.	GCA_945859645.1	14	901004774	111	22200	https://doi.org/10.12688/wellcomeopenres.19512.1
ilAmpTrag2	Amphipyra tragopoginis	Mouse moth	Head and thorax	Abdomen	.	GCA_905220435.1	32	395751095	70	14000	https://doi.org/10.12688/wellcomeopenres.18946.1
ilAnaInnx2	Anarsia innoxiella	Acer sober	Whole organism	.	.	GCA_947563765.1	31	302913609	58	11600	https://doi.org/10.12688/wellcomeopenres.19514.1
ilAnoMund1	Anorthoa munda	Twin-spotted quaker	Thorax	Abdomen	.	GCA_945859665.1	14	901004774	111	22200	https://doi.org/10.12688/wellcomeopenres.19625.1
ilAntCard3	Anthocharis cardamines	Orange tip	Abdomen	.	.	GCA_905404175.1	31	353448772	56	15600	https://doi.org/10.12688/wellcomeopenres.18117.1
ilAntChix2	Antitype chi	Grey chi	Head and thorax	Abdomen	.	GCA_947359405.1	32	395751095	70	14000	https://doi.org/10.12688/wellcomeopenres.19288.1
ilAntDeri1	Anticlea derivata	Streamer	Head and thorax	.	.	GCA_947579855.1	32	353327860	38	7600	https://doi.org/10.12688/wellcomeopenres.19525.1
ilApaEpom1	Apamea epomidion	Clouded brindle	Head and thorax	Abdomen	.	GCA_947507525.1	32	395751095	70	14000	https://doi.org/10.12688/wellcomeopenres.22767.1
ilApaMono1	Apamea monoglypha	Dark arches	Abdomen	.	.	GCA_911387795.1	31	353448772	56	15600	https://doi.org/10.12688/wellcomeopenres.18947.1
ilApaSord1	Apamea sordens	Rustic shoulder-knot	Thorax	.	.	GCA_945859715.1	31	614313245	4	800	https://doi.org/10.12688/wellcomeopenres.18712.1
ilApeSyri1	Apeira syringaria	Lilac beauty	Head and thorax	.	.	GCA_934044485.1	30	537609937	0	0	https://doi.org/10.12688/wellcomeopenres.19208.1
ilAplEffo1	Aplocera efformata	Lesser treble-bar	Thorax	Abdomen	.	GCA_921293045.1	32	348033227	4	800	https://doi.org/10.12688/wellcomeopenres.18595.1
ilApoBetu1	Apotomis betuletana	Birch marble	Whole organism	.	.	GCA_932273695.1	28	681708712	74	14800	https://doi.org/10.12688/wellcomeopenres.18984.1
ilApoBist1	Apomyelois bistriatella	Heath knot-horn	Whole organism	.	.	GCA_947044815.1	28	681708712	74	14800	https://doi.org/10.12688/wellcomeopenres.19306.1
ilApoCapr1	Apotomis capreana	Sallow marble	Whole organism	.	.	GCA_947623375.1	28	681708712	74	14800	https://doi.org/10.12688/wellcomeopenres.20875.1
ilApoCrat1	Aporia crataegi	Black veined white	Whole organism	.	.	GCA_912999735.1	28	681708712	74	14800	https://doi.org/10.12688/wellcomeopenres.17709.1
ilApoHisp1	Apocheima hispidaria	Small brindled beauty	Thorax	Abdomen	.	GCA_947579745.1	29	419520011	61	12200	https://doi.org/10.12688/wellcomeopenres.22423.1
ilApoLima1	Apoda limacodes	Festoon	Head and thorax	.	.	GCA_946406115.1	25	799963736	59	11800	https://doi.org/10.12688/wellcomeopenres.18747.1
ilApoLuen1	Aporophyla lueneburgensis	Northern deep-brown dart	Thorax	Abdomen	.	GCA_932294355.1	29	419520011	61	12200	https://doi.org/10.12688/wellcomeopenres.19296.1
ilApoNigr3	Aporophyla nigra	Black rustic	Whole organism	Whole organism		GCA_947507805.1	31	734696620	58	11600	https://doi.org/10.12688/wellcomeopenres.19339.1
ilApoTurb1	Apotomis turbidana	White-shouldered marble	Whole organism	.	.	GCA_905147355.2	28	681708712	74	14800	https://doi.org/10.12688/wellcomeopenres.19242.1
ilArcCraa1	Archips crataeganus	Brown oak tortrix	Whole organism	.	.	GCA_947859365.1	28	681708712	74	14800	https://doi.org/10.12688/wellcomeopenres.20413.1
ilArcXylo1	Archips xylosteana	Variegated golden tortrix	Whole organism	.	.	GCA_947563465.1	28	681708712	74	14800	https://doi.org/10.12688/wellcomeopenres.20362.1
ilAriAges1	Aricia agestis	Brown argus	Whole organism	.	.	GCA_905147365.1	28	681708712	74	14800	https://doi.org/10.12688/wellcomeopenres.19784.1
ilAriArta2	Aricia artaxerxes	Northern brown argus	Whole organism	.	.	GCA_937612035.1	28	681708712	74	14800	https://doi.org/10.12688/wellcomeopenres.18664.1
ilAteCent1	Atethmia centrago	Centre-barred sallow	Head and thorax	Abdomen	.	GCA_905333075.3	31	925295621	34	9800	https://doi.org/10.12688/wellcomeopenres.20651.1
ilAthMouf1	Athrips mouffetella	Dotted grey groundling	Whole organism	.	.	GCA_947532105.1	31	849085778	143	28600	https://doi.org/10.12688/wellcomeopenres.20840.1
ilAutGamm1	Autographa gamma	Silver Y	Whole organism	.	.	GCA_905146925.1	32	357166038	20	4800	https://doi.org/10.12688/wellcomeopenres.17758.1
ilAutPulc1	Autographa pulchrina	Beautiful golden Y	Head and thorax	Abdomen	.	GCA_905475315.1	32	420908157	77	15300	https://doi.org/10.12688/wellcomeopenres.19840.1
ilBemIchn1	Bembecia ichneumoniformis	Six-belted clearwing	Abdomen	.	.	GCA_910589475.1	31	511202460	35	9700	https://doi.org/10.12688/wellcomeopenres.20279.1
ilBicAnyn1	Bicyclus anynana	Squinting bush brown	Whole organism	Whole organism	.	GCA_947172395.1	28	454691811	687	137600	https://doi.org/10.12688/wellcomeopenres.19432.1
ilBisBetu1	Biston betularia	Peppered moth	Thorax	.	.	GCA_905404145.2	31	404482284	11	3400	https://doi.org/10.12688/wellcomeopenres.17578.1
ilBlaAdus2	Blastobasis adustella	Dingy dowd	Whole organism	.	.	GCA_907269095.1	30	546035259	9	2400	https://doi.org/10.12688/wellcomeopenres.19900.1
ilBlaLact1	Blastobasis lacticolella	London dowd	Whole organism	.	.	GCA_905147135.1	30	576549192	70	14733	https://doi.org/10.12688/wellcomeopenres.19839.1
ilBolSele5	Boloria selene	Silver meadow fritillary	Abdomen	.	.	GCA_905231865.2	31	399902484	10	1962	https://doi.org/10.12688/wellcomeopenres.17734.1
ilBraVimi1	Brachylomia viminalis	Minor shoulder-knot	Abdomen	.	.	GCA_937001585.1	31	780377336	44	8800	https://doi.org/10.12688/wellcomeopenres.19538.1
ilCalPalu1	Calamotropha paludella	Bulrush veneer	Abdomen	Head and thorax	.	GCA_927399485.1	30	741450216	17	5800	https://doi.org/10.12688/wellcomeopenres.19297.1
ilCamMarg1	Campaea margaritaria	Light emerald	Abdomen	.	.	GCA_912999815.1	31	335209595	7	1700	https://doi.org/10.12688/wellcomeopenres.20136.1
ilCarClav1	Caradrina clavipalpis	Pale mottled willow	Thorax	Abdomen	.	GCA_932526535.1	31	474181573	3	600	https://doi.org/10.12688/wellcomeopenres.18103.1
ilCarKade1	Caradrina kadenii	Clancy's rustic	Abdomen	.	.	GCA_947462355.1	31	425936699	5	1000	https://doi.org/10.12688/wellcomeopenres.19286.1
ilCarPala2	Carterocephalus palaemon	Arctic skipper	Whole organism	.	.	GCA_944567765.1	31	392620792	16	3200	https://doi.org/10.12688/wellcomeopenres.19573.1
ilCarQuer1	Carcina quercana	Long-horned flat-body	Whole organism	.	.	GCA_910589575.1	30	409372353	25	8300	https://doi.org/10.12688/wellcomeopenres.18596.1
ilCatFrax1	Catocala fraxini	Cliften non-pareil	Thorax	Head	.	GCA_930367265.1	31	780578037	14	3700	https://doi.org/10.12688/wellcomeopenres.17818.1
ilCelArgi3	Celastrina argiolus	Holly blue	Whole organism	.	.	GCA_905187575.1	26	499081963	109	7112	https://doi.org/10.12688/wellcomeopenres.17478.1
ilChaFerr1	Charanyca ferruginea	Brown rustic	Thorax	.	.	GCA_947361185.1	31	853164804	114	22625	https://doi.org/10.12688/wellcomeopenres.20137.1
ilCheLega1	Chesias legatella	Streak	Head and thorax	.	.	GCA_947359385.1	31	310144805	44	8800	https://doi.org/10.12688/wellcomeopenres.19298.1
ilChlSite2	Chloroclysta siterata	Red-green carpet	Thorax	Abdomen	.	GCA_932294275.1	20	437747713	4	800	https://doi.org/10.12688/wellcomeopenres.19301.1
ilChrCulm1	Chrysoteuchia culmella	Garden grass-veneer	Whole organism	Whole organism	.	GCA_910589605.1	31	644008883	32	10400	https://doi.org/10.12688/wellcomeopenres.18107.1
ilCloCurt1	Clostera curtula	Chocolate tip	Abdomen	Head and thorax	.	GCA_905475355.1	30	512665902	111	32400	https://doi.org/10.12688/wellcomeopenres.19984.1
ilColCroc2	Colias croceus	Clouded yellow	Thorax	.	.	GCA_905220415.1	32	324897031	9	3300	https://doi.org/10.12688/wellcomeopenres.17292.1
ilColFlav1	Coleophora flavipennella	Tipped oak case-bearer	Whole organism	.	.	GCA_947284805.1	57	980488476	426	85200	https://doi.org/10.12688/wellcomeopenres.19917.1
ilConVacc3	Conistra vaccinii	The chestnut	Thorax	.	.	GCA_948150665.1	31	719970318	56	11200	https://doi.org/10.12688/wellcomeopenres.20346.1
ilCosPyra2	Cosmia pyralina	Lunar-spotted Pinion	Head and thorax	Abdomen	.	GCA_946251885.1	31	802337962	134	26800	https://doi.org/10.12688/wellcomeopenres.20148.1
ilCosTrap1	Cosmia trapezina	Dun-bar pinion	Thorax and abdomen	.	.	GCA_905163495.2	32	824141514	204	33485	https://doi.org/10.12688/wellcomeopenres.17925.1
ilCraLigu1	Craniophora ligustri	Coronet	Thorax and abdomen	Head and thorax	.	GCA_905163465.1	32	437978302	62	17800	https://doi.org/10.12688/wellcomeopenres.18987.1
ilCroElin1	Crocallis elinguaria	Scalloped oak	Abdomen	.	.	GCA_907269065.1	17	424321387	5	1600	https://doi.org/10.12688/wellcomeopenres.20081.1
ilCyaSemi1	Cyaniris semiargus	Mazarine blue	Whole organism	.	.	GCA_905187585.1	24	441467852	9	2375	https://doi.org/10.12688/wellcomeopenres.19362.1
ilCybMeso1	Cybosia mesomella	Four-dotted Footman	Thorax	.	.	GCA_946251805.1	31	946666815	159	31800	https://doi.org/10.12688/wellcomeopenres.18745.1
ilCydAmpl1	Cydia amplana	Rusty oak	Whole organism	.	.	GCA_948474715.1	28	503932876	70	14000	https://doi.org/10.12688/wellcomeopenres.19536.1
ilCydSple1	Cydia splendana	Marbled piercer	Whole organism	Whole organism	.	GCA_910591565.1	28	597922410	149	38500	https://doi.org/10.12688/wellcomeopenres.19520.1
ilCydStro3	Cydia strobilella	Spruce-seed moth	Whole organism	Whole organism	.	GCA_947568885.1	28	542573076	64	12800	https://doi.org/10.12688/wellcomeopenres.21214.1
ilDeiPorc1	Deilephila porcellus	Small elephant hawk-moth	Abdomen	.	.	GCA_905220455.2	29	402017726	5	1600	https://doi.org/10.12688/wellcomeopenres.17740.1
ilDiaChry1	Diachrysia chrysitis	Burnished brass	Thorax	.	.	GCA_932294365.1	31	385966557	1	200	https://doi.org/10.12688/wellcomeopenres.18990.1
ilDiaMend1	Diaphora mendica	Muslin	Head and thorax	Abdomen	.	GCA_949125395.1	26	746670298	72	14400	https://doi.org/10.12688/wellcomeopenres.19540.1
ilDiaRubi1	Diarsia rubi	Small square-spot	Thorax	.	.	GCA_932274075.1	32	624871509	12	2400	https://doi.org/10.12688/wellcomeopenres.19299.1
ilDicOoxx2	Dicycla oo	Heart Moth	Abdomen	.	.	GCA_948252095.1	31	932581160	119	23800	https://doi.org/10.12688/wellcomeopenres.19535.1
ilDilCaer1	Diloba caeruleocephala	Figure of eight	Head and thorax	Head and thorax	.	GCA_947459985.1	31	762385617	100	20000	https://doi.org/10.12688/wellcomeopenres.20497.1
ilDreFalc1	Drepana falcataria	Pebble hook-tip	Head and thorax	.	.	GCA_945859725.1	31	326729860	3	600	https://doi.org/10.12688/wellcomeopenres.19213.1
ilDryErem1	Dryobotodes eremita	Brindled green	Thorax	Abdomen	.	GCA_917490735.1	32	695059829	35	8800	https://doi.org/10.12688/wellcomeopenres.19300.1
ilDryLabe1	Dryobota labecula	Oak rustic	Head and thorax	.	.	GCA_947523025.1	32	766602579	89	17800	https://doi.org/10.12688/wellcomeopenres.19541.1
ilDryRufi1	Drymonia ruficornis	Lunar marbled brown	Thorax	Abdomen	.	GCA_947859195.1	29	369570989	65	13000	https://doi.org/10.12688/wellcomeopenres.21225.1
ilEclSila1	Ecliptopera silaceata	Small phoenix	Whole organism	Abdomen	.	GCA_932527185.1	29	311096976	6	1200	https://doi.org/10.12688/wellcomeopenres.19207.1
ilEilCani1	Eilema caniola	Hoary footman	Head and thorax	.	.	GCA_949126895.1	31	763429236	83	16600	https://doi.org/10.12688/wellcomeopenres.20574.1
ilEilDepe1	Eilema depressum	Buff footman	Thorax	Abdomen	.	GCA_914767945.1	30	622006817	7	2600	https://doi.org/10.12688/wellcomeopenres.19808.1
ilEilSoro1	Eilema sororcula	Orange footman	Whole organism	.	.	GCA_914829495.1	30	728998946	117	38700	https://doi.org/10.12688/wellcomeopenres.19626.1
ilEleCory1	Electrophaes corylata	Broken-barred carpet	Head and thorax	.	.	GCA_947095575.1	30	347464159	27	5400	https://doi.org/10.12688/wellcomeopenres.19627.1
ilEleSimi1	Elegia similella	White-barred knot-horn	Whole organism	.	.	GCA_947532085.1	30	780370363	16	3200	https://doi.org/10.12688/wellcomeopenres.21213.1
ilEmmMono1	Emmelina monodactyla	Common plume	Whole organism	.	.	GCA_916618145.1	30	312212826	26	8200	https://doi.org/10.12688/wellcomeopenres.19035.1
ilEndFlam1	Endotricha flammealis	Rose-flounced tabby	Whole organism	.	.	GCA_905163395.1	32	473557997	248	52600	https://doi.org/10.12688/wellcomeopenres.19923.1
ilEnnFusc2	Ennomos fuscantarius	Dusky thorn	Head and thorax	Whole organism	.	GCA_905220475.2	31	444703273	9	1431	https://doi.org/10.12688/wellcomeopenres.20174.1
ilEnnQuei1	Ennomos quercinarius	August thorn	Abdomen	.	.	GCA_910589525.1	31	491710801	18	4200	https://doi.org/10.12688/wellcomeopenres.20175.1
ilEpiBilu1	Epinotia bilunana	Crescent bell	Whole organism	.	.	GCA_947049275.1	28	657892466	97	19400	https://doi.org/10.12688/wellcomeopenres.19334.1
ilEpiDema1	Epinotia demarniana	Birch bell	Whole organism	.	.	GCA_945867215.1	28	734760068	66	13200	https://doi.org/10.12688/wellcomeopenres.19574.1
ilEpiNise2	Epinotia nisella	Grey poplar bell	Whole organism	.	.	GCA_932294315.1	28	584556325	8	1600	https://doi.org/10.12688/wellcomeopenres.19621.1
ilEpiRame1	Epinotia ramella	Small birch bell	Whole organism	.	.	GCA_947578815.1	28	746936677	72	14400	https://doi.org/10.12688/wellcomeopenres.20150.1
ilEraDefo1	Erannis defoliaria	Mottled umber	Abdomen and thorax	.	.	GCA_905404285.1	29	522035704	53	12100	https://doi.org/10.12688/wellcomeopenres.17815.1
ilEreAeth2	Erebia aethiops	Scotch argus	Whole organism	.	.	GCA_923060345.1	20	461485130	25	6100	https://doi.org/10.12688/wellcomeopenres.17927.1
ilEreLige1	Erebia ligea	Arran brown	Whole organism	.	.	GCA_917051295.1	29	505993816	38	5593	https://doi.org/10.12688/wellcomeopenres.18115.1
ilEryTage1	Erynnis tages	Dingy skipper	Whole organism	.	.	GCA_905147235.1	31	329114246	70	21817	https://doi.org/10.12688/wellcomeopenres.19755.1
ilEspSulp1	Esperia sulphurella	Sulphur tubic	Whole organism	.	.	GCA_947086405.1	30	453125121	71	14200	https://doi.org/10.12688/wellcomeopenres.19212.1
ilEucMixx1	Euclidia mi	Mother Shipton	Abdomen	Head and thorax	.	GCA_944739405.1	31	2276536343	1912	382400	https://doi.org/10.12688/wellcomeopenres.19098.1
ilEudLacu3	Eudonia lacustrata	Little grey	Whole organism	Whole organism	.	GCA_947562085.1	30	697216319	172	34400	https://doi.org/10.12688/wellcomeopenres.19646.1
ilEudProf1	Eudemis profundana	Diamond-back marble	Whole organism	.	.	GCA_947034925.1	28	690915811	91	18200	https://doi.org/10.12688/wellcomeopenres.19370.1
ilEugGlar6	Eugnorisma glareosa	Autumnal rustic	Thorax	.	.	GCA_947578425.1	30	629586356	59	11800	https://doi.org/10.12688/wellcomeopenres.19987.1
ilEulPrun1	Eulithis prunata	The phoenix	Abdomen	.	.	GCA_918843925.1	30	263131874	5	2200	https://doi.org/10.12688/wellcomeopenres.19371.1
ilEulTest2	Eulithis testata	Chevron	Head and thorax	.	.	GCA_947507515.1	30	307856822	33	6600	https://doi.org/10.12688/wellcomeopenres.19433.1
ilEupAbbr2	Eupithecia abbreviata	Brindled pug	Whole organism	Whole organism	.	GCA_943735965.1	32	374068472	5	1000	https://doi.org/10.12688/wellcomeopenres.19244.1
ilEupCent1	Eupithecia centaureata	Lime-speck pug	Whole organism	.	.	GCA_944547425.1	32	449317959	384	76800	https://doi.org/10.12688/wellcomeopenres.19249.1
ilEupDodo1	Eupithecia dodoneata	Oak tree pug	Whole organism	.	.	GCA_947044415.1	31	353611563	7	1400	https://doi.org/10.12688/wellcomeopenres.19245.1
ilEupExig1	Eupithecia exiguata	Mottled pug	Whole organism	.	.	GCA_947086465.1	31	372853882	85	17000	https://doi.org/10.12688/wellcomeopenres.20637.1
ilEupInsi1	Eupithecia insigniata	Pinion-spotted pug	Whole organism	.	.	GCA_947859395.1	31	437870750	98	19600	https://doi.org/10.12688/wellcomeopenres.19652.1
ilEupLuci1	Euplexia lucipara	Small angle shades	Abdomen	.	.	GCA_921972225.1	31	658853858	56	18700	https://doi.org/10.12688/wellcomeopenres.20242.1
ilEupSimi1	Euproctis similis	Yellow-tail	Abdomen and thorax	Abdomen and thorax	.	GCA_905147225.2	22	507390924	25	4300	https://doi.org/10.12688/wellcomeopenres.17188.1
ilEupTran1	Eupsilia transversa	The satellite	Abdomen and thorax	Thorax	.	GCA_914767815.1	32	466907300	19	5900	https://doi.org/10.12688/wellcomeopenres.18105.1
ilEupVulg1	Eupithecia vulgata	Common pug	Whole organism	.	.	GCA_946478455.1	31	454374414	13	2600	https://doi.org/10.12688/wellcomeopenres.19246.1
ilEuzPing2	Euzophera pinguis	Ash-bark knot-horn	Whole organism	.	.	GCA_947363495.1	30	463434033	72	14400	https://doi.org/10.12688/wellcomeopenres.19393.1
ilFabAdip1	Fabriciana adippe	High brown fritillary	Abdomen	Abdomen	.	GCA_905404265.1	29	477254088	16	3600	https://doi.org/10.12688/wellcomeopenres.18569.1
ilFisYpsi1	Fissipunctia ypsillon	Dingy shears	Abdomen	.	.	GCA_947568875.1	31	714729074	177	35400	https://doi.org/10.12688/wellcomeopenres.19524.1
ilFurFurc1	Furcula furcula	Sallow kitten	Thorax	Abdomen	.	GCA_911728495.1	29	735996785	24	8400	https://doi.org/10.12688/wellcomeopenres.18112.1
ilGanPyra1	Gandaritis pyraliata	Barred straw	Head and thorax	.	.	GCA_947859175.1	31	294938481	40	8000	https://doi.org/10.12688/wellcomeopenres.19526.1
ilGlaAlex1	Glaucopsyche alexis	Green-underside blue	Whole organism	.	.	GCA_905404095.1	23	618774694	149	40900	https://doi.org/10.12688/wellcomeopenres.17264.1
ilGriApri1	Griposia aprilina	Merveille du jour	Thorax	Abdomen	.	GCA_916610205.1	32	715634843	31	10700	https://doi.org/10.12688/wellcomeopenres.18122.1
ilGymRufi1	Gymnoscelis rufifasciata	Double-striped pug	Whole organism	.	.	GCA_929108375.1	32	453140436	9	3600	https://doi.org/10.12688/wellcomeopenres.17790.1
ilHabPyri1	Habrosyne pyritoides	Buff arches	Abdomen	Head and thorax	.	GCA_907165245.1	31	400553399	6	2100	https://doi.org/10.12688/wellcomeopenres.20151.1
ilHecDyso1	Hecatera dysodea	Small ranunculus	Thorax	Head	.	GCA_905332915.2	32	640503875	75	22400	https://doi.org/10.12688/wellcomeopenres.19067.1
ilHedSali1	Hedya salicella	White-backed marble	Whole organism	.	.	GCA_905404275.2	25	741470835	15	5362	https://doi.org/10.12688/wellcomeopenres.19436.1
ilHemAest2	Hemithea aestivaria	Common emerald	Whole organism	.	.	GCA_947507615.1	31	498464436	283	56600	https://doi.org/10.12688/wellcomeopenres.19542.1
ilHemChry1	Hemistola chrysoprasaria	Small emerald	Abdomen	.	.	GCA_947063395.1	30	438196497	50	10000	https://doi.org/10.12688/wellcomeopenres.19999.1
ilHerTari1	Herminia tarsipennalis	The fan foot	Head and thorax	Abdomen	.	GCA_945859575.1	30	788969415	46	9200	https://doi.org/10.12688/wellcomeopenres.19543.1
ilHesComm1	Hesperia comma	Common branded skipper	Whole organism	.	.	GCA_905404135.1	29	525130142	86	18832	https://doi.org/10.12688/wellcomeopenres.19762.1
ilHipSeme1	Hipparchia semele	Rock grayling	Whole organism	.	.	GCA_933228805.1	30	399018540	13	2600	https://doi.org/10.12688/wellcomeopenres.20183.1
ilHofPseu3	Hofmannophila pseudospretella	Brown house moth	Whole organism	.	.	GCA_947369225.1	28	406079741	50	10000	https://doi.org/10.12688/wellcomeopenres.19394.1
ilHydFurc1	Hydriomena furcata	July highflyer	Abdomen	Head and thorax	.	GCA_912999785.1	28	422982219	20	5800	https://doi.org/10.12688/wellcomeopenres.20182.1
ilHydMica1	Hydraecia micacea	Rosy rustic	Thorax	.	.	GCA_914767645.1	32	562322981	18	6000	https://doi.org/10.12688/wellcomeopenres.17832.1
ilHylFasc1	Hylaea fasciaria	Barred red	Head and thorax	.	.	GCA_905147375.1	31	327798893	11	3400	https://doi.org/10.12688/wellcomeopenres.19925.1
ilHypCost1	Hypsopygia costalis	Gold triangle	Whole organism	.	.	GCA_937001555.1	31	816371584	31	6200	https://doi.org/10.12688/wellcomeopenres.18746.1
ilHypProb1	Hypena proboscidalis	The snout	Head and thorax	Whole organism	.	GCA_905147285.1	31	626125995	23	3277	https://doi.org/10.12688/wellcomeopenres.17189.1
ilIdaAver1	Idaea aversata	Riband wave	Whole organism	.	.	GCA_907269075.1	30	436713420	6	1800	https://doi.org/10.12688/wellcomeopenres.18899.1
ilIncMasc1	Incurvaria masculella	Feathered bright	Whole organism	.	.	GCA_946894095.1	26	551918069	11	2200	https://doi.org/10.12688/wellcomeopenres.19205.1
ilLacWlai2	Lacanobia wlatinum	Light brocade	Whole organism	Whole organism	.	GCA_947578705.1	31	888110669	126	25200	https://doi.org/10.12688/wellcomeopenres.19653.1
ilLamSuff1	Lampropteryx suffumata	Water carpet	Thorax	Abdomen	.	GCA_948098915.1	31	580395944	70	14000	https://doi.org/10.12688/wellcomeopenres.19654.1
ilLaoPopu1	Laothoe populi	Poplar hawk-moth	Abdomen	.	.	GCA_905220505.1	29	576297946	102	30500	https://doi.org/10.12688/wellcomeopenres.17191.1
ilLasFlex1	Laspeyria flexula	Beautiful hook-tip	Whole organism	Abdomen	.	GCA_905147015.1	31	450626249	18	3468	https://doi.org/10.12688/wellcomeopenres.20351.1
ilLasMege1	Lasiommata megera	Wall brown	Whole organism	.	.	GCA_928268935.1	30	484809906	16	3500	https://doi.org/10.12688/wellcomeopenres.18106.1
ilLatStri6	Lathronympha strigana	Tortricid	Whole organism	.	.	GCA_949128165.1	28	619840204	61	12200	https://doi.org/10.12688/wellcomeopenres.19833.1
ilLepSina1	Leptidea sinapis	Wood white	Whole organism	Whole organism	.	GCA_905404315.1	48	685538706	13	2302	https://doi.org/10.12688/wellcomeopenres.18118.1
ilLeuSali1	Leucoma salicis	White satin	Abdomen	Thorax	.	GCA_948253155.1	30	732086526	97	19400	https://doi.org/10.12688/wellcomeopenres.19649.1
ilLigAdus1	Ligdia adustata	Scorched carpet	Head and thorax	Abdomen	.	GCA_947049295.1	31	399607598	17	3400	https://doi.org/10.12688/wellcomeopenres.20611.1
ilLimCami1	Limenitis camilla	White admiral	Whole organism	Whole organism	.	GCA_905147385.1	31	432675538	28	7634	https://doi.org/10.12688/wellcomeopenres.18594.1
ilLitOrni1	Lithophane ornitopus	Grey shoulder-knot	Thorax	Abdomen	.	GCA_948473465.1	31	508469328	58	11600	https://doi.org/10.12688/wellcomeopenres.21280.1
ilLitSemi2	Lithophane semibrunnea	Tawny pinion	.		.	GCA_947363905.1	32	556559597	245	49000	.
ilLitSoci1	Lithophane socia	Pale pinion	Thorax	Thorax	.	GCA_947522985.1	31	489058472	48	9600	https://doi.org/10.12688/wellcomeopenres.20645.1
ilLobHalt1	Lobophora halterata	Seraphim	Abdomen	.	.	GCA_932526365.1	32	314813451	4	800	https://doi.org/10.12688/wellcomeopenres.18713.1
ilLomBima1	Lomographa bimaculata	White-pinioned spotted	Head and thorax	Abdomen	.	GCA_948107665.1	31	554705000	35	7000	https://doi.org/10.12688/wellcomeopenres.20841.1
ilLupTest1	Luperina testacea	Flounced rustic	Thorax	.	.	GCA_927399505.1	31	601432332	34	10526	https://doi.org/10.12688/wellcomeopenres.17816.1
ilLycHirt1	Lycia hirtaria	Brindled beauty	Thorax	.	.	GCA_947563715.1	14	551557540	63	12600	https://doi.org/10.12688/wellcomeopenres.19650.1
ilLycPhla1	Lycaena phlaeas	Small copper	Whole organism	.	.	GCA_905333005.1	24	420468287	3	900	https://doi.org/10.12688/wellcomeopenres.17289.1
ilLymMona1	Lymantria monacha	Black arches	Whole organism	.	.	GCA_905163515.2	28	915604503	17	1700	https://doi.org/10.12688/wellcomeopenres.17817.1
ilLysBell1	Lysandra bellargus	Adonis blue	Whole organism	Whole organism	.	GCA_905333045.1	46	526058640	222	63200	https://doi.org/10.12688/wellcomeopenres.18330.1
ilLysCori1	Lysandra coridon	Chalkhill blue	Whole organism	Whole organism	.	GCA_905220515.1	90	540303944	239	58694	https://doi.org/10.12688/wellcomeopenres.19253.1
ilMacNota1	Macaria notata	Peacock moth	Abdomen	.	.	GCA_927399415.1	29	393695855	2	400	https://doi.org/10.12688/wellcomeopenres.18108.1
ilMamBras1	Mamestra brassicae	Cabbage moth	Mid-body tissue	Mid-body tissue	.	GCA_905163435.1	31	575491649	27	8900	https://doi.org/10.12688/wellcomeopenres.20165.1
ilManJurt1	Maniola jurtina	Meadow brown	Whole organism	Whole organism	.	GCA_905333055.1	30	402000231	21	3697	https://doi.org/10.12688/wellcomeopenres.17304.1
ilMarLuna1	Marasmarcha lunaedactyla	Crescent plume	Whole organism	.	.	GCA_923062675.1	31	766116032	10	3200	https://doi.org/10.12688/wellcomeopenres.20107.1
ilMegAlbu1	Meganola albula	Kent black arches	Whole organism	Head and thorax	.	GCA_936450015.1	30	405058096	13	4100	https://doi.org/10.12688/wellcomeopenres.18672.1
ilMelAtha1	Mellicta athalia	Heath fritillary	Whole organism	.	.	GCA_905220545.2	32	600210958	81	25800	https://doi.org/10.12688/wellcomeopenres.17280.1
ilMelCinx1	Melitaea cinxia	Glanville fritillary	Whole organism	.	.	GCA_905220565.1	31	499397863	80	25000	https://doi.org/10.12688/wellcomeopenres.17283.1
ilMelGala2	Melanargia galathea	Marbled white	Whole organism	Whole organism	.	GCA_920104075.1	25	601053097	88	29000	https://doi.org/10.12688/wellcomeopenres.17807.1
ilMelPers1	Melanchra persicariae	Dot moth	Thorax	.	.	GCA_947386135.1	31	647225521	62	12400	https://doi.org/10.12688/wellcomeopenres.19410.1
ilMesFuru1	Mesoligia furuncula	Cloaked minor	Whole organism	Whole organism	.	GCA_916614155.1	31	886487339	330	99300	https://doi.org/10.12688/wellcomeopenres.19537.1
ilMicArun2	Micropterix aruncella	White-barred gold	Whole organism	.	.	GCA_944548615.1	31	1031798470	3190	638000	https://doi.org/10.12688/wellcomeopenres.18714.1
ilMilMini2	Miltochrista miniata	Rosy footman	Whole organism	Abdomen	.	GCA_933228765.1	32	1047132395	74	14617	https://doi.org/10.12688/wellcomeopenres.20505.1
ilMimTili1	Mimas tiliae	Lime hawk-moth	Abdomen	.	.	GCA_905332985.1	29	477965817	11	3100	https://doi.org/10.12688/wellcomeopenres.17485.1
ilMonLaev2	Monopis laevigella	Skin moth	Whole organism	.	.	GCA_947359445.1	25	623487182	93	18600	https://doi.org/10.12688/wellcomeopenres.19810.1
ilMusNiti1	Musotima nitidalis	Golden-brown fern	Head and thorax	.	.	GCA_949126915.1	31	555002230	57	11400	https://doi.org/10.12688/wellcomeopenres.21108.1
ilMytAlbi1	Mythimna albipuncta	White-point	Thorax	.	.	GCA_929112965.1	31	698470600	7	2000	https://doi.org/10.12688/wellcomeopenres.20682.1
ilMytFerr1	Mythimna ferrago	The clay	Abdomen	.	.	GCA_910589285.1	32	845524576	10	2600	https://doi.org/10.12688/wellcomeopenres.17923.1
ilMytImpu1	Mythimna impura	Smoky wainscot	Abdomen and thorax	Abdomen and thorax	.	GCA_905147345.1	32	922910159	45	11700	https://doi.org/10.12688/wellcomeopenres.18104.1
ilNemSwae1	Nematopogon swammerdamellus	Large long-horn	Whole organism	.	.	GCA_946902875.1	31	698034255	217	43400	https://doi.org/10.12688/wellcomeopenres.20186.1
ilNocFimb1	Noctua fimbriata	Broad-bordered yellow underwing	Abdomen	.	.	GCA_905163415.1	32	564004937	214	57731	https://doi.org/10.12688/wellcomeopenres.17490.1
ilNocJant1	Noctua janthe	Lesser broad-boardered yellow underwing	Abdomen	.	.	GCA_910589295.1	31	532747648	8	2200	https://doi.org/10.12688/wellcomeopenres.19412.1
ilNocPron1	Noctua pronuba	Large yellow underwing	Whole organism	.	.	GCA_905220335.1	32	528632879	25	5988	https://doi.org/10.12688/wellcomeopenres.17747.1
ilNotDrom1	Notodonta dromedarius	Iron prominent	Head and thorax	.	.	GCA_905147325.1	31	339756599	12	4717	https://doi.org/10.12688/wellcomeopenres.17489.1
ilNotUddm1	Notocelia uddmanniana	Bramble shoot	Whole organism	.	.	GCA_905163555.1	28	793093953	189	57765	https://doi.org/10.12688/wellcomeopenres.17488.1
ilNotZicz1	Notodonta ziczac	Pebble prominent	Thorax	.	.	GCA_918843915.1	31	350852392	4	1100	https://doi.org/10.12688/wellcomeopenres.17789.1
ilNycReva1	Nycteola revayana	Oak nycteoline	Whole organism	Abdomen	.	GCA_947037095.1	25	619772831	66	13200	https://doi.org/10.12688/wellcomeopenres.21567.1
ilNymNiti1	Nymphula nitidulata	Beautiful china-mark	Whole organism	.	.	GCA_947347705.1	31	635098461	5	1000	https://doi.org/10.12688/wellcomeopenres.21102.1
ilNymPoly1	Nymphalis polychloros	Large tortoiseshell	Thorax	Thorax	.	GCA_905220585.2	32	396880798	6	1457	https://doi.org/10.12688/wellcomeopenres.17196.1
ilOchPlec1	Ochropleura plecta	Flame shoulder	Abdomen	Head and thorax	.	GCA_905475445.1	32	643845521	88	17517	https://doi.org/10.12688/wellcomeopenres.20187.1
ilOchSylv3	Ochlodes sylvanus	Large skipper	Whole organism	Whole organism	.	GCA_905404295.1	30	379583688	94	24200	https://doi.org/10.12688/wellcomeopenres.18788.1
ilOliLatr1	Oligia latruncula	Tawny Marbled Minor	Whole organism	.	.	GCA_948474745.1	31	563905079	76	15200	https://doi.org/10.12688/wellcomeopenres.19640.1
ilOmpLuno1	Omphaloscelis lunosa	Lunar underwing	Thorax	Abdomen	.	GCA_916610215.1	32	657165948	11	3100	https://doi.org/10.12688/wellcomeopenres.20188.1
ilOpeBrum1	Operophtera brumata	Winter moth	Thorax	Abdomen	.	GCA_932527175.1	15	617426744	24	4800	https://doi.org/10.12688/wellcomeopenres.20361.1
ilOpiLute1	Opisthograptis luteolata	Brimstone moth	Whole organism	.	.	GCA_931315375.1	32	364741409	5	1000	https://doi.org/10.12688/wellcomeopenres.18101.1
ilOrgAnti1	Orgyia antiqua	Vapourer	Whole organism	Whole organism	.	GCA_916999025.1	14	479900324	7	2300	https://doi.org/10.12688/wellcomeopenres.19480.1
ilOrtGrac1	Orthosia gracilis	Powdered quaker	Thorax	.	.	GCA_947562075.1	14	715196208	72	14400	https://doi.org/10.12688/wellcomeopenres.19644.1
ilOrtInce1	Orthosia incerta	Clouded drab	Thorax	Abdomen	.	GCA_948252205.1	29	938395769	291	58200	https://doi.org/10.12688/wellcomeopenres.23308.1
ilPamAuri1	Pammene aurita	Sycamore piercer	Whole organism	.	.	GCA_947086415.1	28	1039889429	194	38800	https://doi.org/10.12688/wellcomeopenres.19243.1
ilPamFasc1	Pammene fasciana	Acorn piercer	Whole organism	.	.	GCA_911728535.1	28	564119014	38	6931	https://doi.org/10.12688/wellcomeopenres.18114.1
ilPanCinn1	Pandemis cinnamomeana	White-faced tortrix	Whole organism	.	.	GCA_932294345.1	30	425440904	34	6800	https://doi.org/10.12688/wellcomeopenres.19544.1
ilPapMach1	Papilio machaon	Common yellow swallowtail	Thorax	.	.	GCA_912999745.1	31	252046983	4	1100	https://doi.org/10.12688/wellcomeopenres.18119.1
ilParAegt1	Pararge aegeria	Speckled wood	Whole organism	.	.	GCA_905163445.1	29	509842287	10	1498	https://doi.org/10.12688/wellcomeopenres.17278.1
ilParStra1	Parapoynx stratiotata	Ringed china-mark	Whole organism	.	.	GCA_910589355.1	30	478158901	30	11400	https://doi.org/10.12688/wellcomeopenres.17808.1
ilPerRhom1	Peribatodes rhomboidaria	Willow beauty	Abdomen	.	.	GCA_911728515.1	31	499521812	23	8200	https://doi.org/10.12688/wellcomeopenres.19479.1
ilPhaBuce1	Phalera bucephala	Buff-tip	Whole organism	Abdomen and thorax	.	GCA_905147815.2	31	903812264	157	46060	https://doi.org/10.12688/wellcomeopenres.17539.1
ilPheGnom1	Pheosia gnoma	Lesser swallow prominent	Whole organism	Head and thorax	.	GCA_905404115.1	31	271165504	63	17000	https://doi.org/10.12688/wellcomeopenres.19411.1
ilPheTrem1	Pheosia tremula	Swallow prominent	Abdomen and thorax	.	.	GCA_905333125.1	31	290034038	68	19400	https://doi.org/10.12688/wellcomeopenres.17484.1
ilPhiVetu1	Philereme vetulata	Brown scallop	Abdomen	.	.	GCA_918857605.1	68	770465254	135	47600	https://doi.org/10.12688/wellcomeopenres.18948.1
ilPhlMeti2	Phlogophora meticulosa	Angle shades	Head and thorax	Abdomen, head and thorax	.	GCA_905147745.1	31	512677722	8	1731	https://doi.org/10.12688/wellcomeopenres.17757.1
ilPhrFuli1	Phragmatobia fuliginosa	Ruby tiger	Abdomen	.	.	GCA_932526445.1	28	629282137	41	8200	https://doi.org/10.12688/wellcomeopenres.19204.1
ilPieBrab1	Pieris brassicae	Large white	Whole organism	.	.	GCA_905147105.1	16	275080092	6	1337	https://doi.org/10.12688/wellcomeopenres.17274.1
ilPieNapi4	Pieris napi	Green-veined white	Whole organism	.	.	GCA_905231885.1	25	319186821	26	6500	https://doi.org/10.12688/wellcomeopenres.17277.1
ilPieRapa1	Pieris rapae	Small white	Whole organism	.	.	GCA_905147795.1	26	255952703	4	1000	https://doi.org/10.12688/wellcomeopenres.17288.1
ilPleArgu1	Plebejus argus	Silver-studded blue	Whole organism	Whole organism	.	GCA_905404155.1	23	379254911	168	48400	https://doi.org/10.12688/wellcomeopenres.18607.1
ilPluXylo3	Plutella xylostella	Diamondback moth	Whole organism	.	.	GCA_932276165.1	31	323252780	5	1300	https://doi.org/10.12688/wellcomeopenres.20006.1
ilPolIcar1	Polyommatus icarus	Common blue	Whole organism	.	.	GCA_937595015.1	23	511184185	104	20283	https://doi.org/10.12688/wellcomeopenres.18772.1
ilPolLich1	Polymixis lichenea	Feathered Ranunculus	Head and thorax	.	.	GCA_949091785.1	30	716283137	77	15400	https://doi.org/10.12688/wellcomeopenres.20007.1
ilProPyga1	Protodeltote pygarga	Marbled white spot	Abdomen	.	.	GCA_936450705.1	31	421669069	11	2200	https://doi.org/10.12688/wellcomeopenres.20571.1
ilPtiCapc1	Ptilodon capucinus	Coxcomb prominent	Thorax	.	.	GCA_914767695.1	31	348696490	2	400	https://doi.org/10.12688/wellcomeopenres.19539.1
ilPyrFari1	Pyralis farinalis	Meal moth	Thorax	.	.	GCA_947507595.1	27	976818118	258	51600	https://doi.org/10.12688/wellcomeopenres.19641.1
ilPyrMalv3	Pyrgus malvae	Grizzled skipper	Whole organism	.	.	GCA_911387765.1	31	724290426	5	1900	https://doi.org/10.12688/wellcomeopenres.17806.1
ilSatPavo1	Saturnia pavonia	Emperor moth	Thorax	Abdomen	.	GCA_947532125.1	30	489824894	40	8000	https://doi.org/10.12688/wellcomeopenres.20652.1
ilSchCost1	Schrankia costaestrigalis	Pinion-streaked snout	Whole organism	.	.	GCA_905475405.1	31	571474337	41	6024	https://doi.org/10.12688/wellcomeopenres.19402.1
ilSelDent1	Selenia dentaria	Early thorn	Abdomen	.	.	GCA_917880725.1	30	1029259109	92	28000	https://doi.org/10.12688/wellcomeopenres.20140.1
ilSesApif2	Sesia apiformis	Hornet moth	Whole organism	.	.	GCA_914767545.1	31	546633765	19	6200	https://doi.org/10.12688/wellcomeopenres.20236.1
ilSesBemb1	Sesia bembeciformis	Lunar hornet	Abdomen	Abdomen	.	GCA_943735995.1	31	476381626	7	1400	https://doi.org/10.12688/wellcomeopenres.19111.1
ilShaVerb5	Shargacucullia verbasci	Mullein moth	Whole organism	.	.	GCA_947562105.1	32	422665404	48	9600	https://doi.org/10.12688/wellcomeopenres.19757.1
ilSphPina1	Sphinx pinastri	Pine hawkmoth	Abdomen	Thorax	.	GCA_947568825.1	28	508868530	8	1600	https://doi.org/10.12688/wellcomeopenres.19731.1
ilSpiLubr1	Spilosoma lubricipeda	White ermine	Abdomen	.	.	GCA_905220595.1	30	587198453	20	4432	https://doi.org/10.12688/wellcomeopenres.17190.1
ilSpiLutu1	Spilarctia lutea	Buff ermine	Abdomen	Thorax	.	GCA_916048165.1	32	583151044	20	6517	https://doi.org/10.12688/wellcomeopenres.19065.1
ilSteBipu1	Stenoptilia bipunctidactyla	Twin-spot plume	Whole organism	Whole organism	.	GCA_944452665.1	30	791676025	354	70800	https://doi.org/10.12688/wellcomeopenres.19081.1
ilSynAndr1	Synanthedon andrenaeformis	Orange-tailed clearwing	Abdomen	Abdomen	.	GCA_936446665.1	31	348113457	10	2000	https://doi.org/10.12688/wellcomeopenres.21110.1
ilSynForm1	Synanthedon formicaeformis	Red-tipped clearwing	Head and thorax	Abdomen	.	GCA_945859745.1	31	321216854	4	800	https://doi.org/10.12688/wellcomeopenres.19487.1
ilSynMyop1	Synanthedon myopaeformis	Red-belted clearwing	Head and thorax	Abdomen	.	GCA_944738685.1	31	295610239	4	438	https://doi.org/10.12688/wellcomeopenres.21111.1
ilSynTipu2	Synanthedon tipuliformis	Currant clearwing	Head and thorax	.	.	GCA_947623395.1	31	295538671	26	5200	https://doi.org/10.12688/wellcomeopenres.19647.1
ilSynVesp1	Synanthedon vespiformis	Yellow-legged clearwing	Abdomen	.	.	GCA_918317495.1	31	287383648	8	2500	https://doi.org/10.12688/wellcomeopenres.18109.1
ilTelLucu1	Teleiodes luculella	Crescent groundling	Whole organism	.	.	GCA_948473455.1	30	432691193	1355	271000	https://doi.org/10.12688/wellcomeopenres.21090.1
ilThaMatu1	Thalpophila matura	Straw underwing	Thorax	.	.	GCA_948465475.1	31	509984556	45	9000	https://doi.org/10.12688/wellcomeopenres.20640.1
ilTheBrit1	Thera britannica	Spruce carpet	Thorax	Abdomen	.	GCA_939531255.1	19	379438862	95	19000	https://doi.org/10.12688/wellcomeopenres.19107.1
ilTheObel3	Thera obeliscata	Grey pine carpet	Head and thorax	.	.	GCA_947578465.1	18	387711830	68	13600	https://doi.org/10.12688/wellcomeopenres.20005.1
ilThoDeci1	Tholera decimalis	Feathered gothic	Head and thorax	Abdomen	.	GCA_943138885.1	31	1318650589	254	50800	https://doi.org/10.12688/wellcomeopenres.19395.1
ilThuSene1	Thumatha senex	Round-winged muslin	Whole organism	.	.	GCA_948477245.1	30	791299291	10	2000	https://doi.org/10.12688/wellcomeopenres.19648.1
ilThyBati1	Thyatira batis	Peach blossom	Abdomen and thorax	Abdomen and thorax	.	GCA_905147785.1	31	313796409	48	14600	https://doi.org/10.12688/wellcomeopenres.17268.1
ilThySylv1	Thymelicus sylvestris	Small skipper	Whole organism	Whole organism	.	GCA_911387775.1	28	470529692	14	3800	https://doi.org/10.12688/wellcomeopenres.17577.1
ilTilAura1	Tiliacea aurago	Barred sallow	Head and thorax	Abdomen	.	GCA_948098905.1	31	797353351	66	13200	https://doi.org/10.12688/wellcomeopenres.21576.1
ilTinPell1	Tinea pellionella	Casemaking clothes moth	Whole organism	.	.	GCA_948150575.1	30	245097588	64	12800	https://doi.org/10.12688/wellcomeopenres.21015.1
ilTinSemi1	Tinea semifulvella	Fulvous clothes moth	Head and thorax	Abdomen	.	GCA_910589645.1	45	596584503	26	6531	https://doi.org/10.12688/wellcomeopenres.19079.1
ilTinTrin1	Tinea trinotella	Bird's-nest moth	Whole organism	Whole organism	.	GCA_905220615.1	30	371680692	3	500	https://doi.org/10.12688/wellcomeopenres.17826.1
ilTorAlte1	Tortricodes alternella	Winter shade	Whole organism	Whole organism	.	GCA_947859335.1	22	441173430	61	12200	https://doi.org/10.12688/wellcomeopenres.21494.1
ilTriEmor1	Trisateles emortualis	Olive crescent	Head and thorax	Abdomen	.	GCA_947095525.1	31	565493760	21	4200	https://doi.org/10.12688/wellcomeopenres.20836.1
ilTyrJaco4	Tyria jacobaeae	Cinnabar moth	Whole organism	Thorax	.	GCA_947561695.1	31	588379691	85	17000	https://doi.org/10.12688/wellcomeopenres.19545.1
ilUdeOliv2	Udea olivalis	Olive pearl	Whole organism	.	.	GCA_947369235.1	31	623556625	92	18400	https://doi.org/10.12688/wellcomeopenres.19373.1
ilVanAtal1	Vanessa atalanta	Red admiral	Whole organism	.	.	GCA_905147765.1	32	368345843	16	3548	https://doi.org/10.12688/wellcomeopenres.17524.1
ilVanCard2	Vanessa cardui	Painted lady	Whole organism	.	.	GCA_905220365.1	32	424577752	90	25800	https://doi.org/10.12688/wellcomeopenres.17358.1
ilWatBina1	Watsonalla binaria	Oak hook-tip	Abdomen	.	.	GCA_929442735.1	33	332949469	8	1440	https://doi.org/10.12688/wellcomeopenres.19634.1
ilXanIcte2	Xanthia icteritia	Sallow	Abdomen	.	.	GCA_949128155.1	30	664391409	57	11400	https://doi.org/10.12688/wellcomeopenres.21623.1
ilXanSpad1	Xanthorhoe spadicearia	Red twin-spot carpet	Head and thorax	Abdomen	.	GCA_947086425.1	31	276641036	18	3600	https://doi.org/10.12688/wellcomeopenres.20699.1
ilXesCnig1	Xestia c-nigrum	Setaceous Hebrew character	Head and thorax	Abdomen	.	GCA_916618015.1	31	759601803	17	6100	https://doi.org/10.12688/wellcomeopenres.18608.1
ilXesSexs1	Xestia sexstrigata	Six-striped rustic	Thorax	Abdomen	.	GCA_941918905.1	32	638586613	138	27600	https://doi.org/10.12688/wellcomeopenres.19988.1
ilXesXant1	Xestia xanthographa	Square-spot rustic	Whole organism	Abdomen and thorax	.	GCA_905147715.2	32	932118745	242	46342	https://doi.org/10.12688/wellcomeopenres.17538.1
ilXylAreo1	Xylocampa areola	Early grey	Whole organism	Abdomen	.	GCA_935421205.1	31	564312228	7	1400	https://doi.org/10.12688/wellcomeopenres.18663.1
ilYpoCagn1	Yponomeuta cagnagella	Spindle ermine	.		.	GCA_947310995.1	31	551039465	39	7800	.
ilYpoPade2	Yponomeuta padella	European small ermine moth	.		.	GCA_947311075.1	31	555568903	71	14200	.
ilYpoPlub1	Yponomeuta plumbellus	Black-tipped ermine	Whole organism	Abdomen	.	GCA_947310845.1	31	635496876	15	3000	https://doi.org/10.12688/wellcomeopenres.19368.1
ilYpoRore1	Yponomeuta rorrellus	Willow ermine moth	.		.	GCA_947308005.1	31	543481651	117	23400	.
ilYpoSedl1	Yponomeuta sedellus	Grey ermine	Whole organism	.	.	GCA_934045075.1	31	655801758	397	79400	https://doi.org/10.12688/wellcomeopenres.18898.1
ilYpsScab1	Ypsolopha scabrella	Wainscot smudge	Whole organism	.	.	GCA_910592155.1	31	853315793	51	16800	https://doi.org/10.12688/wellcomeopenres.19837.1
ilYpsSequ2	Ypsolopha sequella	Pied smudge	Whole organism	.	.	GCA_934047225.1	30	839790501	74	14800	https://doi.org/10.12688/wellcomeopenres.18768.1
ilZeuPyri1	Zeuzera pyrina	Leopard moth	Abdomen	Abdomen	.	GCA_907165235.1	31	686711406	10	4100	https://doi.org/10.12688/wellcomeopenres.19064.1
ilZygFili1	Zygaena filipendulae	6-spot burnet	Whole organism	Abdomen	.	GCA_907165275.2	31	356282259	9	3600	https://doi.org/10.12688/wellcomeopenres.17924.1
inChrCarn1	Chrysoperla carnea	Common green lacewing	Whole organism	.	.	GCA_905475395.1	6	527653120	15	4000	https://doi.org/10.12688/wellcomeopenres.17455.1
ioIscEleg1	Ischnura elegans	Blue-tailed damselfly	Whole organism	.	.	GCA_921293095.1	14	1662899688	216	70200	https://doi.org/10.12688/wellcomeopenres.17691.1
ioPlaPenn1	Platycnemis pennipes	White-legged damselfly	Thorax	Thorax	.	GCA_933228895.1	13	1750240944	160	28523	https://doi.org/10.12688/wellcomeopenres.19772.1
ioSymStri1	Sympetrum striolatum	Common darter	Head and thorax	Abdomen	.	GCA_947579665.1	12	1243688720	339	67800	https://doi.org/10.12688/wellcomeopenres.19937.1
ipIsoGram3	Isoperla grammatica	Common yellow sally	Whole organism	Whole organism	.	GCA_945910005.1	12	740121121	1749	349800	https://doi.org/10.12688/wellcomeopenres.19066.1
ipLeuNigr2	Leuctra nigra	Black needle fly	Whole organism	.	.	GCA_934045905.1	13	528371011	1544	308999	https://doi.org/10.12688/wellcomeopenres.19082.1
ipNemDubi1	Nemoura dubitans	Stonefly	Whole organism	Whole organism	.	GCA_921293005.1	6	318192681	117	48000	https://doi.org/10.12688/wellcomeopenres.19771.1
ipNemPict2	Nemurella pictetii	Stonefly	Whole organism	.	.	GCA_921293315.1	12	255687582	85	29000	https://doi.org/10.12688/wellcomeopenres.17684.1
ipProMont4	Protonemura montana	Spring stonefly	Whole organism	.	.	GCA_947568835.1	11	247598021	52	10400	https://doi.org/10.12688/wellcomeopenres.19790.1
iyAllPice1	Alloplasta piceator	Ichneumon wasp	Head and thorax	.	1	GCA_946863875.1	11	541773460	1084	217200	https://doi.org/10.12688/wellcomeopenres.19206.1
iyAmbArma2	Amblyteles armatorius	Ichneumonid wasp	Thorax	Thorax	1	GCA_933228735.1	12	205830510	51	10200	https://doi.org/10.12688/wellcomeopenres.18920.1
iyAncNigr1	Ancistrocerus nigricornis	Early mason-wasp	Thorax	Abdomen	.	GCA_916049575.1	6	231995547	115	23000	https://doi.org/10.12688/wellcomeopenres.20134.1
iyAndBuce1	Andrena bucephala	Big-headed mining bee	Thorax	Abdomen	.	GCA_947577245.1	5	379553290	181	36200	https://doi.org/10.12688/wellcomeopenres.21003.1
iyAndDors1	Andrena dorsata	Short-fringed mining bee	Thorax	.	.	GCA_929108735.1	3	269108231	25	5000	https://doi.org/10.12688/wellcomeopenres.19756.1
iyAndFulv1	Andrena fulva	Tawny mining bee	Thorax	Abdomen	.	GCA_946251845.1	7	370501945	41	8200	https://doi.org/10.12688/wellcomeopenres.19510.1
iyAndHaem1	Andrena haemorrhoa	Orange-tailed mining bee	Abdomen	Abdomen	.	GCA_910592295.1	7	291265543	32	6800	https://doi.org/10.12688/wellcomeopenres.19982.1
iyAndHatt1	Andrena hattorfiana	Large scabious mining bee	Thorax	Abdomen	2	GCA_944738655.1	7	422090317	189	37800	https://doi.org/10.12688/wellcomeopenres.19438.1
iyAndMinu1	Andrena minutula	Common mini-mining bee	Whole organism	Whole organism	.	GCA_929113495.1	7	349929805	206	46600	https://doi.org/10.12688/wellcomeopenres.18611.1
iyAnoNige1	Anoplius nigerrimus	Spider wasp	Thorax	.	.	GCA_914767735.1	15	277009058	34	11600	https://doi.org/10.12688/wellcomeopenres.17814.1
iyAthRosa1	Athalia rosae	Turnip sawfly	Thorax	Whole organism	.	GCA_917208135.1	8	170936952	54	15256	https://doi.org/10.12688/wellcomeopenres.18993.1
iyBomCamp1	Bombus campestris	Field cuckoo-bee	Whole organism	Whole organism	1	GCA_905333015.2	25	270199396	48	11100	https://doi.org/10.12688/wellcomeopenres.18985.1
iyBomHort1	Bombus hortorum	Garden bumblebee	Head and thorax	Abdomen	.	GCA_905332935.1	18	263339468	24	6800	https://doi.org/10.12688/wellcomeopenres.17187.1
iyBomHypn1	Bombus hypnorum	Tree bumblebee	Thorax	Thorax	1	GCA_911387925.1	12	269036764	33	6500	https://doi.org/10.12688/wellcomeopenres.18778.1
iyBomPasc1	Bombus pascuorum	Common carder bee	Head and thorax	Thorax	.	GCA_905332965.1	17	270113285	33	7517	https://doi.org/10.12688/wellcomeopenres.19251.1
iyBomPrat1	Bombus pratorum	Early bumblebee	Head and thorax	Head	.	GCA_930367275.1	18	274293271	39	13033	https://doi.org/10.12688/wellcomeopenres.19250.1
iyBomSyle1	Bombus sylvestris	Forest cuckoo bee	Head and thorax	Abdomen	1	GCA_911622165.1	24	291046068	45	9431	https://doi.org/10.12688/wellcomeopenres.18986.1
iyBomTerr1	Bombus terrestris	Buff-tailed bumblebee	Head and thorax	Thorax	.	GCA_910591885.1	18	290775483	31	8900	https://doi.org/10.12688/wellcomeopenres.19248.1
iyBuaLabo1	Buathra laborator	Ichneumon wasp	Thorax	.	.	GCA_934046635.1	11	225482505	28	8000	https://doi.org/10.12688/wellcomeopenres.18674.1
iyCamRapt1	Campoletis raptor	Ichneumonid wasp	Whole organism	.	.	GCA_948107755.1	11	217432986	155	31000	https://doi.org/10.12688/wellcomeopenres.19738.1
iyCerRyby1	Cerceris rybyensis	Ornate tailed digger wasp	Abdomen	.	.	GCA_910591515.1	14	375504447	22	7700	https://doi.org/10.12688/wellcomeopenres.17483.1
iyCliInci1	Clistopyga incitator	Ichneumon wasp	Head and thorax	.	.	GCA_947507545.1	21	259934124	157	31400	https://doi.org/10.12688/wellcomeopenres.19302.1
iyCoeConi1	Coelioxys conoideus	Shared-tail bee	Abdomen	.	.	GCA_947623535.1	12	343453480	97	19400	https://doi.org/10.12688/wellcomeopenres.19507.1
iyDolMedi1	Dolichovespula media	Median wasp	Head and thorax	Head and thorax	.	GCA_911387685.1	25	216402427	195	68700	https://doi.org/10.12688/wellcomeopenres.20179.1
iyDolSaxo1	Dolichovespula saxonica	Saxon wasp	Head and thorax	Head and thorax	1	GCA_911387935.1	26	205288667	370	121100	https://doi.org/10.12688/wellcomeopenres.20180.1
iyDolSylv1	Dolichovespula sylvestris	Tree wasp	Thorax	.	1	GCA_918808275.2	26	222276281	320	119636	https://doi.org/10.12688/wellcomeopenres.17783.1
iyEctCont1	Ectemnius continuus	Digger wasp	Head and thorax	.	.	GCA_910591665.1	14	235497558	34	8300	https://doi.org/10.12688/wellcomeopenres.20138.1
iyEctLitu1	Ectemnius lituratus	Digger wasp	Head and thorax	Head and thorax	.	GCA_910593735.1	13	216166758	233	75700	https://doi.org/10.12688/wellcomeopenres.20337.1
iyIchXant1	Ichneumon xanthorius	Parasitoid wasp	Thorax	.	.	GCA_917499995.1	12	246161801	139	48700	https://doi.org/10.12688/wellcomeopenres.17683.1
iyLasLatv2	Lasioglossum lativentre	Furry-claspered furrow bee	Whole organism	.	.	GCA_916610255.1	14	351472003	101	38400	https://doi.org/10.12688/wellcomeopenres.17706.1
iyLasMori1	Lasioglossum morio	Common green furrow bee	Whole organism	.	. .	GCA_916610235.2	12	305317844	44	12700	https://doi.org/10.12688/wellcomeopenres.18715.1
iyLasPaux1	Lasioglossum pauxillum	Lobe-spurred furrow bee	Whole organism	.	2	GCA_933228785.1	9	430154896	123	24600	https://doi.org/10.12688/wellcomeopenres.20950.1
iyMacEuro1	Macropis europaea	Yellow loosestrife bee	Thorax	.	1	GCA_916610135.2	11	337527336	42	16200	https://doi.org/10.12688/wellcomeopenres.17787.1
iyMegLign1	Megachile ligniseca	Wood-carving leafcutter bee	Thorax	Abdomen	.	GCA_945859555.1	16	224359728	1	200	https://doi.org/10.12688/wellcomeopenres.21002.1
iyMegWill1	Megachile willughbiella	Willughby's leafcutter bee	Abdomen and thorax	Head and thorax	.	GCA_945859595.2	16	278400919	2	1000	https://doi.org/10.12688/wellcomeopenres.21026.1
iyMimDahl1	Mimumesa dahlbomi	Solitary wasp	Whole organism	.	.	GCA_917499265.2	18	258744608	44	11200	https://doi.org/10.12688/wellcomeopenres.19989.1
iyNetDila1	Netelia fuscicornis	Ichneumonid wasp	Thorax	Abdomen	.	GCA_946811545.1	6	292046766	165	33000	https://doi.org/10.12688/wellcomeopenres.22578.1
iyNomFabr1	Nomada fabriciana	Fabricius' nomad bee	Whole organism	.	2	GCA_907165295.1	12	218401540	10	1400	https://doi.org/10.12688/wellcomeopenres.20184.1
iyNomFuca1	Nomada fucata	Painted nomad bee	Head	.	.	GCA_948146005.1	8	259295937	82	16400	https://doi.org/10.12688/wellcomeopenres.19927.1
iyNysSpin1	Nysson spinosus	Large spurred digger wasp	Head and thorax	Abdomen	2	GCA_910591585.1	26	231180108	48	17100	https://doi.org/10.12688/wellcomeopenres.20949.1
iyOphLute1	Ophion slaviceki	Ichneumon wasp	Abdomen	.	2	GCA_944452715.1	13	639526494	2264	452800	https://doi.org/10.12688/wellcomeopenres.19996.1
iyPemLugu1	Pemphredon lugubris	Mournful wasp	Thorax	Abdomen	.	GCA_933228935.1	5	313886327	427	85400	https://doi.org/10.12688/wellcomeopenres.20948.1
iyRhoChlo1	Rhogogaster chlorosoma	Pale rhogogaster	Thorax	Abdomen	2	GCA_944452935.1	10	255271170	17	3217	https://doi.org/10.12688/wellcomeopenres.18924.1
iySelTumu1	Seladonia tumulorum	Bronze furrow bee	Whole organism	.	1	GCA_913789895.2	17	333608526	12	3300	https://doi.org/10.12688/wellcomeopenres.17784.1
iySphMoni1	Sphecodes monilicornis	Box-headed blood bee	Thorax	.	1	GCA_913789915.2	19	471954888	137	52300	https://doi.org/10.12688/wellcomeopenres.17786.1
iyStePhae1	Stelis phaeoptera	Plain dark bee	Abdomen	Thorax	2	GCA_943735885.1	17	244895215	6	1200	https://doi.org/10.12688/wellcomeopenres.18876.1
iyTenDist1	Tenthredo distinguenda	Small wasp-sawfly	Whole organism	.	1	GCA_947538915.1	9	226698621	16	3200	https://doi.org/10.12688/wellcomeopenres.19523.1
iyTenMeso1	Tenthredo mesomela	Common green-Tenthredo	Thorax	Abdomen	2	GCA_943736025.1	10	386789856	178	35600	https://doi.org/10.12688/wellcomeopenres.18992.1
iyTenNoth1	Tenthredo notha	Sawfly	Thorax	.	.	GCA_914767705.1	20	252597259	71	17500	https://doi.org/10.12688/wellcomeopenres.17811.1
iyTipFemo1	Tiphia femorata	Beetle killing wasp	Whole organism	.	2	GCA_944319695.1	12	272678743	26	5200	https://doi.org/10.12688/wellcomeopenres.18893.1
iyVesCrab1	Vespa crabro	European hornet	Thorax	.	.	GCA_910589235.1	25	217941923	107	27700	https://doi.org/10.12688/wellcomeopenres.17546.1
iyVesGerm1	Vespula germanica	German wasp	Head and thorax	.	.	GCA_905340365.1	25	202797057	20	6217	https://doi.org/10.12688/wellcomeopenres.17703.1
iyVesVulg1	Vespula vulgaris	Common wasp	Head and thorax	Whole organism	.	GCA_905475345.1	25	187173957	22	6200	https://doi.org/10.12688/wellcomeopenres.17205.1
jaDiaLine6	Diadumene lineata	Orange-striped anemone	Whole organism	Whole organism	.	GCA_918843875.1	16	299848564	172	61700	https://doi.org/10.12688/wellcomeopenres.17763.1
jaMetSeni4	Metridium senile	Brown sea anemone	Whole organism	.	.	GCA_949775045.1	16	382499206	338	68000	https://doi.org/10.12688/wellcomeopenres.20376.1
jaNemVect1	Nematostella vectensis	Starlet sea anemone	Whole organism	Whole organism	.	GCA_932526225.1	15	268587961	174	34800	https://doi.org/10.12688/wellcomeopenres.18991.1
jhCanCock6	Candelabrum cocksii	(a hydroid)	Whole organism	Whole organism	.	GCA_963930725.1	15	232808647	117	23400	https://doi.org/10.12688/wellcomeopenres.22705.1
jrHalOcto1	Haliclystus octoradiatus	Spotted kaleidoscope jellyfish	Mid-body tissue	Mid-body tissue	.	GCA_916610825.1	9	257392333	301	95900	https://doi.org/10.12688/wellcomeopenres.18669.1
kaAplTurb1	Aplidium turbinatum	(a colonial sea squirt)	Whole organism	Whole organism	.	GCA_918807975.1	18	605415736	53	19600	https://doi.org/10.12688/wellcomeopenres.17785.1
kaAscMent1	Ascidia mentula	(a solitary sea squirt)	Whole organism	Whole organism	.	GCA_947561715.1	9	192204865	32	6400	https://doi.org/10.12688/wellcomeopenres.20415.1
kaClaLepa1	Clavelina lepadiformis	Light-bulb sea squirt	Whole organism	Whole organism	.	GCA_947623445.1	9	207209329	56	11200	https://doi.org/10.12688/wellcomeopenres.20417.1
kcLamFluv1	Lampetra fluviatilis	European river lamprey	.	.	.	GCA_964198595.1	82	977272419	1730	346000	.
kmMyxGlut1	Myxine glutinosa	Atlantic hagfish	Liver	Liver	.	GCA_964187855.1	14	2663897417	4403	880479	https://doi.org/10.12688/wellcomeopenres.24925.1
laTriPals1	Triglochin palustris	.	.	.	.	GCA_964197745.1	12	435841018	236	47025	.
lpBroSter1	Bromus sterilis	Barren brome	Leaf	Leaf	.	GCA_950022295.1	7	2670575829	110	22000	https://doi.org/10.12688/wellcomeopenres.22994.1
lpCarAren1	Carex arenaria	.	.	.	.	GCA_964058765.1	27	351724135	168	33600	.
lpCarDepa1	Carex depauperata	.	.	.	.	GCA_964197715.1	22	699853091	282	56400	.
lpCarDivu1	Carex divulsa	.	.	.	.	GCA_964058785.1	27	388098559	205	41000	.
lpCarPend1	Carex pendula	Pendulous sedge	.	.	.	GCA_964058885.1	31	362222763	30	6000	.
lpCarRost1	Carex rostrata	Bottle sedge	Leaf and Stem	.	.	GCA_964058835.1	35	376029344	46	9200	https://doi.org/10.12688/wellcomeopenres.23874.1
lpCarSylv1	Carex sylvatica	.	.	.	.	GCA_964058815.1	29	362446279	201	40200	.
lpJunEffu1	Juncus effusus	Soft rush	Leaf	Leaf	.	GCA_946800655.1	21	238972964	179	54700	https://doi.org/10.12688/wellcomeopenres.19770.1
lpLuzSylv1	Luzula sylvatica	Great wood rush	Leaf	.	.	GCA_946800325.1	6	430670785	148	29600	https://doi.org/10.12688/wellcomeopenres.20997.1
lpPhrAust1	Phragmites australis	Common reed	Leaf	Leaf	.	GCA_958298935.1	24	848363935	59	11626	https://doi.org/10.12688/wellcomeopenres.23143.1
lpSchLacu1	Schoenoplectus lacustris	.	.	.	.	GCA_964200675.1	20	479915302	275	55000	.
lpSchTriq1	Schoenoplectus triqueter	Club-rush	.	.	.	GCA_964058795.1	21	573013785	273	54600	.
mApoSyl1	Apodemus sylvaticus	Wood mouse	Ear clip	.	.	GCA_947179515.1	25	2747641392	1129	225617	https://doi.org/10.12688/wellcomeopenres.20001.1
mCanLor1	Canis lupus	Greenland wolf	Muscle	.	.	GCA_905319855.2	40	2417703804	166	45800	https://doi.org/10.12688/wellcomeopenres.17332.1
mCerEla1	Cervus elaphus	Red deer	Blood	.	.	GCA_910594005.1	34	2771818003	38	9400	https://doi.org/10.12688/wellcomeopenres.17493.1
mDelDel1	Delphinus delphis	Short-beaked common dolphin	Lung	Lung	.	GCA_949987515.1	23	2364366909	968	193431	https://doi.org/10.12688/wellcomeopenres.23918.1
mEptNil1	Eptesicus nilssonii	Northern bat	Placenta	Placenta	.	GCA_951640355.1	26	2038303554	1420	284000	https://doi.org/10.12688/wellcomeopenres.19896.1
mGloMel1	Globicephala melas	Long-finned pilot whale	Lung	Lung	.	GCA_963455315.1	23	2363742672	1082	216217	https://doi.org/10.12688/wellcomeopenres.23919.1
mHypAmp2	Hyperoodon ampullatus	Northern bottlenose whale	Skin	Skin	.	GCA_949752795.1	21	2444433211	1098	219600	https://doi.org/10.12688/wellcomeopenres.22743.1
mLagAlb1	Lagenorhynchus albirostris	White-beaked dolphin	Lung	Lung	.	GCA_949774975.1	22	2403574927	1070	214000	https://doi.org/10.12688/wellcomeopenres.23369.1
mMarMar1	Martes martes	European pine marten	Liver	Liver	.	GCA_963455335.1	20	2435896614	2245	449000	https://doi.org/10.12688/wellcomeopenres.22458.1
mMelMel3	Meles meles	European badger	Blood	.	.	GCA_922984935.2	23	2606051894	99	22800	https://doi.org/10.12688/wellcomeopenres.18230.1
mMicMin1	Micromys minutus	European harvest mouse	Muscle	Muscle	.	GCA_963924665.1	34	2244247249	2018	403600	https://doi.org/10.12688/wellcomeopenres.22747.1
mMunRee1	Muntiacus reevesi	Reeves' muntjac	Muscle	Muscle	.	GCA_963930625.1	23	2544623430	682	136400	https://doi.org/10.12688/wellcomeopenres.22608.1
mMusMuc1	Mus musculus	House mouse	.		.	GCA_949316315.1	20	2666911009	101	20200	.
mOrcOrc1	Orcinus orca	Killer whale	Blood	.	.	GCA_937001465.1	22	2482232656	123	24436	https://doi.org/10.12688/wellcomeopenres.18278.1
mPhoPho1	Phocoena phocoena	Harbor porpoise	Lung	Lung	.	GCA_963924675.1	22	2372345763	964	192800	https://doi.org/10.12688/wellcomeopenres.24011.1
mPipPyg2	Pipistrellus pygmaeus	Soprano pipistrelle	Heart and muscle	Liver	.	GCA_949987585.1	23	1844891533	155	30817	https://doi.org/10.12688/wellcomeopenres.19895.1
mPleAur1	Plecotus auritus	Brown big-eared bat	Muscles	.	.	GCA_963455305.1	16	2159627807	1237	247441	https://doi.org/10.12688/wellcomeopenres.21501.1
mSteCoe1	Stenella coeruleoalba	Striped dolphin	Lung	Lung	.	GCA_951394435.1	23	2405763191	992	198231	https://doi.org/10.12688/wellcomeopenres.23374.1
paTetJugo1	Tetramitus jugosus	Heterolobosean amoeboflagellate	.	.	.	GCA_937625935.1	52	26116894	2	262	https://doi.org/10.12688/wellcomeopenres.20189.1
pxEimPrae1	Eimeria praecox	Coccidian parasite	Cell pellet	.	.	GCA_963920595.1	15	64236767	170	34000	https://doi.org/10.12688/wellcomeopenres.22464.1
qcStrAcum1	Strigamia acuminata	.	.	.	.	GCA_949358305.1	11	224413985	184	36800	https://doi.org/10.12688/wellcomeopenres.19941.1
qhLepNord3	Lepeophtheirus nordmannii	Sea louse	Thorax	Abdomen	.	GCA_963680855.1	9	337846042	119	23800	https://doi.org/10.12688/wellcomeopenres.22913.1
qqAmaFero1	Amaurobius ferox	Black lace-weaver spider	Cephalothorax	Abdomen	.	GCA_951213105.1	23	3527398739	1507	301400	https://doi.org/10.12688/wellcomeopenres.21080.1
qqArgBrue1	Argiope bruennichi	Wasp spider	Cephalothorax	Abdomen	.	GCA_947563725.1	11	1500703123	164	32617	https://doi.org/10.12688/wellcomeopenres.20339.1
qqMetBour1	Meta bourneti	Cave orb-weaver	Cephalothorax	.	.	GCA_933210815.1	11	1151659517	344	68800	https://doi.org/10.12688/wellcomeopenres.18638.1
qqMetSegm1	Metellina segmentata	Autumn spider	Whole organism	.	.	GCA_947359465.1	11	1410654904	565	113000	https://doi.org/10.12688/wellcomeopenres.19435.1
qqOdiSpin1	Odiellus spinosus	Harvestman spider	Cephalothorax	Abdomen	.	GCA_963920705.1	16	364138062	184	36800	https://doi.org/10.12688/wellcomeopenres.22760.1
qqParLuna2	Parasteatoda lunata	Spider	Whole organism	.	.	GCA_949128135.1	10	1181661323	501	100200	https://doi.org/10.12688/wellcomeopenres.19585.1
qqTetMont2	Tetragnatha montana	Silver stretch spider	Cephalothorax	.	.	GCA_963680715.1	13	779282311	251	50200	https://doi.org/10.12688/wellcomeopenres.21782.1
qxSacCarc1	Sacculina carcini	Crab hacker barnacle	Gonad	Gonad	.	GCA_916048095.1	28	262668111	137	41500	https://doi.org/10.12688/wellcomeopenres.18936.1
rZooViv1	Zootoca vivipara	Common lizard	.	.	.	GCA_963506605.1	19	1435931796	683	136600	.
sRajBra1	Raja brachyura	Blonde ray	Gill	Gill	.	GCA_963514005.1	49	2581892688	2251	450200	https://doi.org/10.12688/wellcomeopenres.22825.1
tnLinLong1	Lineus longissimus	Bootlace worm	Mid-body tissue	.	.	GCA_910592395.1	19	390429616	77	14500	https://doi.org/10.12688/wellcomeopenres.17193.1
tzBugNeri2	Bugula neritina	Ruby bryozoan	Colony		.	GCA_964035545.1	9	200241056	54	10800	https://doi.org/10.12688/wellcomeopenres.23056.1
tzBugStol2	Bugulina stolonifera	An erect bryozoan	.	.	.	GCA_935421135.1	11	234633288	30	6000	https://doi.org/10.12688/wellcomeopenres.18775.1
tzCryPall5	Cryptosula pallasiana	An encrusting bryozoan	.	.	.	GCA_945261195.1	12	560463116	570	114000	https://doi.org/10.12688/wellcomeopenres.19100.1
tzMemMemb1	Membranipora membranacea	Sea mat	.	.	.	GCA_914767715.1	11	339205801	72	25200	https://doi.org/10.12688/wellcomeopenres.18855.1
tzWatSuba1	Watersipora subatra	Red ripple bryozoan	.	.	.	GCA_963576615.1	11	735754367	255	51000	https://doi.org/10.12688/wellcomeopenres.22824.1
ucDunPrim2	Dunaliella primolecta	.	Cell culture	Cell culture	.	GCA_914767535.1	16	192743350	96	37500	https://doi.org/10.12688/wellcomeopenres.20190.1
ucMarCocc1	Marvania coccoides	.	Cell culture	.	.	GCA_963854735.1	13	22315660	5	1000	https://doi.org/10.12688/wellcomeopenres.22468.1
ucPycProv1	Pycnococcus provasolii	.	Cell culture	.	.	GCA_938743325.1	44	32229639	5	696	https://doi.org/10.12688/wellcomeopenres.20345.1
wcApoIcte1	Aporrectodea icterica	.	.		.	GCA_963556255.1	16	1108039073	1695	339015	.
wcLumRube1	Lumbricus rubellus	Red compost earthworm	Body wall tissue	Body wall tissue	.	GCA_945859605.1	18	775786089	1880	376000	https://doi.org/10.12688/wellcomeopenres.19834.1
wcLumTerr1	Lumbricus terrestris	Common earthworm	Bodywall and intestine	Bodywall	.	GCA_949752735.1	18	1042178109	1219	243800	https://doi.org/10.12688/wellcomeopenres.20178.1
wdMagJohn1	Magelona johnstoni	.	.	.	.	GCA_963942565.1	18	858387658	8702	1740439	.
wkErpOcto2	Erpobdella octoculata	Leech	.	.	.	GCA_963978895.1	10	381267166	604	120800	.
wpAchSqua1	Acholoe squamosa	Star devouring scaleworm	Mid-body tissue	.	.	GCA_949317995.1	18	1478651454	422	84400	https://doi.org/10.12688/wellcomeopenres.19835.1
wpAleGela1	Alentia gelatinosa	Gelatinous scale worm	Mid-body tissue	Mid-body tissue	.	GCA_950022655.1	15	1229289671	570	114000	https://doi.org/10.12688/wellcomeopenres.20176.1
wpAliVire1	Alitta virens	King ragworm	Posterior body	Posterior body	.	GCA_932294295.1	14	670984160	194	38800	https://doi.org/10.12688/wellcomeopenres.19642.1
wpHarImpa5	Harmothoe impar	(a scale worm)	Anterior body	Anterior body	.	GCA_947462335.1	18	1464446658	2127	425217	https://doi.org/10.12688/wellcomeopenres.19570.1
wpSthLimi1	Sthenelais limicola	(a segmented worm)	Mid-body tissue	.	.	GCA_942159475.1	9	1126567338	1106	221200	https://doi.org/10.12688/wellcomeopenres.18856.1
wrPisGeom1	Piscicola geometra	Fish leech	Whole organism	.	.	GCA_943735955.1	17	164376272	185	37000	https://doi.org/10.12688/wellcomeopenres.19488.1
wtTerLapi1	Terebella lapidaria	(a segmented worm)	Whole organism	Whole organism	.	GCA_949152475.1	16	742711529	232	46400	https://doi.org/10.12688/wellcomeopenres.22823.1
xbArcSenh1	Arcuatula senhousia	Asian date mussel	.	.	.	GCA_963971305.1	15	938073964	882	97500	.
xbAzoCham1	Azorinus chamasolen	Mollusc	.	.	.	GCA_963576725.1	19	1712071981	1772	354400	https://doi.org/10.12688/wellcomeopenres.23457.1
xbCerEdul1	Cerastoderma edule	Edible cockle	.	.	.	GCA_963989375.1	19	821250980	954	190800	.
xbGarTell2	Gari tellinella	(a clam)	Whole organism	Whole organism	.	GCA_922989275.1	19	1595306238	179	35800	https://doi.org/10.12688/wellcomeopenres.17805.1
xbLutLutr1	Lutraria lutraria	Common otter shell	.	.	.	GCA_964023205.1	19	725989197	1058	211615	.
xbMagGiga1	Magallana gigas	Pacific oyster	Muscle	Muscle	.	GCA_963853765.1	10	563188132	155	31000	https://doi.org/10.12688/wellcomeopenres.22255.1
xbMimVari1	Mimachlamys varia	Variegated scallop	Muscle	Muscle	.	GCA_947623455.1	19	973097578	88	17417	https://doi.org/10.12688/wellcomeopenres.19643.1
xbMytEdul2	Mytilus edulis	Blue mussel	Muscle	Muscle	.	GCA_963676685.2	14	1302882844	1187	123800	https://doi.org/10.12688/wellcomeopenres.22704.1
xbOstEdul1	Ostrea edulis	Native oyster	Muscle	Muscle	.	GCA_947568905.1	10	892946111	604	120800	https://doi.org/10.12688/wellcomeopenres.19916.1
xbSpiSoli1	Spisula solida	Surf clam	.	.	.	GCA_947247005.1	19	931394740	94	18800	https://doi.org/10.12688/wellcomeopenres.19486.1
xbSpiSubt1	Spisula subtruncata	Cut surfclam	.	.	.	GCA_963678985.1	19	923958096	430	86000	https://doi.org/10.12688/wellcomeopenres.22286.1
xgAniVort1	Anisus vortex	Whirlpool ramshorn	Whole organism	Whole organism	.	GCA_949126835.1	18	837143898	411	82200	https://doi.org/10.12688/wellcomeopenres.19836.1
xgGibMagu1	Gibbula magus	Turban top shell	Muscle	Muscle	.	GCA_936450465.1	18	1463329951	848	169417	https://doi.org/10.12688/wellcomeopenres.18792.1
xgOncCelt3	Onchidella celtica	Celtic sea slug	Anterior body	.	.	GCA_963931925.1	18	1140064890	923	184600	https://doi.org/10.12688/wellcomeopenres.25000.1
xgPatDepr1	Patella depressa	Black-footed limpet	Muscle	.	.	GCA_948474765.1	9	653569163	81	21600	https://doi.org/10.12688/wellcomeopenres.20687.1
xgPatPell1	Patella pellucida	Blue-rayed limpet	Whole organism	Whole organism	.	GCA_917208275.1	9	709103745	432	148339	https://doi.org/10.12688/wellcomeopenres.17825.1
xgPatUlys2	Patella ulyssiponensis	China limpet	Muscle	Muscle	.	GCA_963678685.1	8	692023346	73	14600	https://doi.org/10.12688/wellcomeopenres.24681.1
xgPatVulg1	Patella vulgata	Common limpet	Muscle	Muscle	.	GCA_932274485.1	9	694430533	75	15000	https://doi.org/10.12688/wellcomeopenres.20008.1
xgPhoLine1	Phorcus lineatus	Thick top shell	Muscle	Muscle	.	GCA_921293015.1	18	955702427	350	70000	https://doi.org/10.12688/wellcomeopenres.19485.1
xgSteCine2	Steromphala cineraria	Grey top shell	Muscle	Muscle	.	GCA_916613615.1	18	1258590459	557	178900	https://doi.org/10.12688/wellcomeopenres.17677.1
xpLepCine2	Lepidochitona cinerea	Grey chiton	.	.	.	GCA_963971465.1	15	702395396	134	26800	.

## Sheet: Table 5
Supplementary Table 5. DToL HiFi alignment statistics (autosomes)
Reference sample	Sample	Number of HiFi reads	Total HiFi base	Mean HiFi read length	Q93 base fraction (%)	HiFi sequence coverage
bAccGen1	bAccGen1	4020916	40030186346	9955.49 ± 4980.23	62.27	35.18
bAnaAcu1	bAnaAcu1	2456423	28880489909	11757.13 ± 4571.97	66.68	28.06
bAnsBra1	bAnsBra1	4006524	40896846572	10207.56 ± 3826.07	68.44	38.24
bCinCin1	bCinCin1	3608383	42850968377	11875.39 ± 5115.87	61.66	42.28
bClaHye2	bClaHye2	4524709	45279076199	10007.07 ± 4786.20	67.23	42.66
bFriCoe1	bFriCoe1	3591321	43728682152	12176.21 ± 5317.79	62.25	43.47
bLarFus1	bLarFus1	6440468	49898912367	7747.72 ± 3931.74	73.63	44.94
bPhaCar2	bPhaCar2	4678333	46303863412	9897.51 ± 4714.27	67.07	40.81
bTetUro1	bTetUro1	2101283	21609117830	10283.77 ± 4464.70	70.61	23.36
daAjuCham1	daAjuCham1	3724092	44739934012	12013.65 ± 5183.97	63.19	50.41
daArcMinu1	daArcMinu1	5390700	70850302878	13143.06 ± 4251.33	60.23	37.25
daBalNigr1	daBalNigr1	2667205	36383946200	13641.23 ± 5552.27	39.43	30.66
daCruLaev1	daCruLaev1	443661	4108391915	9260.21 ± 4465.81	68.62	13.85
daGnaUlig1	daGnaUlig1	1840524	23115859995	12559.39 ± 4914.61	57.44	65.98
daLigVulg1	daLigVulg1	3278863	49086204620	14970.50 ± 6776.74	54.73	35.55
daLinVulg1	daLinVulg1	1574981	21967219951	13947.61 ± 4602.12	50.31	29.05
daMisOron1	daMisOron1	908417	9493854349	10450.99 ± 3802.56	59.6	26.39
daPseLute1	daPseLute1	2602866	31464667682	12088.47 ± 4767.60	63.51	35.74
daPulDyse1	daPulDyse1	2026760	27677224485	13655.90 ± 5810.27	49.29	33.32
daScuGale1	daScuGale1	1817283	19287236414	10613.23 ± 2872.27	64.54	58.86
daScuMino1	daScuMino1	1499984	19129974733	12753.45 ± 4649.54	51.84	56.38
daSheArve1	daSheArve1	743749	7341899677	9871.48 ± 5593.16	64	16.65
daSolDulc1	daSolDulc1	2301995	25688693352	11159.32 ± 4837.80	52.56	27.29
daVerOffi1	daVerOffi1	605319	7926960130	13095.51 ± 4785.23	56.61	27.43
dcAgrGith1	dcAgrGith1	4723569	57362431901	12143.88 ± 4661.79	66.71	33.42
dcCheAlbu1	dcCheAlbu1	4209627	42958332243	10204.78 ± 3822.89	74.66	27.05
dcFalConv1	dcFalConv1	1051977	14242404082	13538.70 ± 6619.66	54.53	11.52
dcPolAvic1	dcPolAvic1	1705540	25102151035	14718.01 ± 5684.00	39.02	72.81
dcSalRamo1	dcSalRamo1	1940534	22212743694	11446.72 ± 5101.24	64.01	42.04
dcSpeBocc1	dcSpeBocc1	1665055	20539590922	12335.68 ± 4273.50	70.38	44.12
dcSpeMari1	dcSpeMari1	1955129	19833258685	10144.22 ± 2884.55	72.02	40.31
ddAraThal4	ddAraThal4	846864	11312632100	13358.26 ± 5295.55	48	82.72
ddBarVulg1	ddBarVulg1	1405324	15776344930	11226.13 ± 3666.54	67.33	64.28
ddEupLath1	ddEupLath1	2317651	30621785824	13212.42 ± 4355.81	53.68	30.04
ddEupPepu3	ddEupPepu3	1180955	17067539857	14452.32 ± 4860.67	41.3	61.66
ddHibTrid2	ddHibTrid2	3471553	44211599104	12735.40 ± 5715.28	58.77	17.35
ddLepDidy1	ddLepDidy1	4239576	48498749678	11439.53 ± 3946.67	68.24	144.36
ddPopNigr1	ddPopNigr1	1911025	22993192889	12031.86 ± 4105.74	68.57	55.66
ddPriVeri1	ddPriVeri1	1696906	16598488765	9781.62 ± 4759.10	65.7	38.12
ddSalCapr1	ddSalCapr1	2068582	24427145584	11808.64 ± 5182.36	66.34	66.85
ddVioOdor1	ddVioOdor1	1637695	20092111237	12268.53 ± 5457.59	58.05	28.79
dhAlnGlut1	dhAlnGlut1	1261952	17436113769	13816.78 ± 4502.68	54.22	38.18
dhMyrGale1	dhMyrGale1	1075930	8821370828	8198.83 ± 4886.28	48.05	13.71
dhQueCerr2	dhQueCerr2	1150563	12479868526	10846.75 ± 5140.01	62.55	16.09
dmBerVulg1	dmBerVulg1	2392594	36326764471	15183.00 ± 6650.25	52.3	28.26
drAceCamp1	drAceCamp1	323507	6720819069	20774.88 ± 6891.23	32.68	12.24
drAilAlti1	drAilAlti1	2998699	43311355986	14443.38 ± 5549.62	46.33	47.19
drAstGlyc1	drAstGlyc1	2196125	20551588452	9358.11 ± 4887.34	64.94	30.3
drBuxSemp1	drBuxSemp1	1460104	20634957656	14132.53 ± 4302.52	49.97	30.98
drChaAngu1	drChaAngu1	1689477	26537659874	15707.62 ± 5829.32	42.63	41.89
drCraLaev2	drCraLaev2	2378854	28609203950	12026.46 ± 5078.86	62.3	44.02
drEroMari8	drEroMari8	1476811	20178872148	13663.81 ± 4929.03	62.85	26.5
drFilUlma1	drFilUlma1	940515	13081161040	13908.51 ± 5150.50	48.72	48.69
drGeuUrba1	drGeuUrba1	2336314	36590907463	15661.81 ± 4814.08	47.28	28.05
drHedHeli1	drHedHeli4	788953	11034099903	13985.75 ± 6038.34	52.11	9.22
drHedHeli1	drHedHeli1	4075140	47478418345	11650.75 ± 3727.70	55.4	39.67
drIleAqui2	drIleAqui2	5344593	64063054979	11986.52 ± 4865.18	26.53	81.37
drMalDome10	drMalDome10	1697495	21506949875	12669.82 ± 5900.78	64.07	33.32
drMalDome11	drMalDome11	2315576	29315447311	12660.11 ± 6365.02	65.8	45.08
drMalDome5	drMalDome5	1633826	18312086553	11208.10 ± 4102.31	67.86	28.36
drMalRobu1	drMalRobu1	1761302	20753721043	11783.17 ± 4710.85	57.13	33.57
drMalSylv7	drMalSylv7	1575363	18489391721	11736.59 ± 5506.38	65.57	28.9
drMedArab1	drMedArab1	2250020	23377833620	10390.06 ± 2857.65	58.83	45.74
drMedLupu1	drMedLupu1	2504274	25788512740	10297.80 ± 3181.18	71.71	45.23
drParJuda1	drParJuda1	1268981	16807860844	13245.16 ± 4484.29	58.81	31.6
drPotAnse1	drPotAnse1	1072387	14887566504	13882.64 ± 4670.17	42.39	71.47
drPotSter1	drPotSter1	1498281	17338629319	11572.35 ± 3477.45	71.46	23.6
drPruPadu1	drPruPadu1	3639252	37506787929	10306.18 ± 4400.47	68.01	84.76
drPyrComm1	drPyrComm1	2309380	26119945387	11310.37 ± 3119.56	69.52	53.89
drTriFrag1	drTriFrag1	1871584	17136798776	9156.31 ± 4021.33	74.16	33.49
drTriSubt1	drTriSubt1	3943394	40030965589	10151.40 ± 4840.18	68.25	82.96
drUmbRupe1	drUmbRupe1	1031374	13486229335	13075.98 ± 6187.87	58.25	38.3
drUrtUren1	drUrtUren1	1736435	14724503240	8479.73 ± 2602.13	69.08	45.14
eaLuiSars1	eaLuiSars1	2163773	22126741989	10226.00 ± 4579.60	67.81	47.55
eaMarGlac1	eaMarGlac1	2581778	24921724917	9652.93 ± 4369.76	56.73	48.29
ecAntBifi1	ecAntBifi1	4535210	32105954903	7079.27 ± 3725.93	77.23	102.02
fAbrBra2	fAbrBra2	4481608	47480392167	10594.50 ± 4390.85	70.51	43.22
fAciRut3	fAciRut3	8015665	108675571090	13557.90 ± 3797.05	63.16	59.96
fBarBab1	fBarBab1	6265339	75102783536	11987.03 ± 4745.88	45.03	47.51
fBarBar1	fBarBar1	1585102	18384769580	11598.48 ± 5865.54	63.38	29.85
fBleOce1	fBleOce1	1772824	18198476205	10265.25 ± 5363.28	55.78	26.88
fCarCar2	fCarCar2	6212870	71412142911	11494.23 ± 5306.50	61.6	43.08
fCheLab1	fCheLab1	2167403	19287799433	8899.04 ± 4450.70	65.78	27.82
fConCon1	fConCon1	3476526	37726869866	10851.89 ± 5194.40	63.51	34.02
fCycLum2	fCycLum2	2466488	22555147463	9144.64 ± 3923.58	66.26	38.87
fDanRer4	fDanRer4	5479130	44554100657	8131.60 ± 3485.86	71.07	31.56
fEchVip8	fEchVip8	2281869	24451409771	10715.52 ± 4422.51	68.76	33.55
fEutGur1	fEutGur1	2013185	22191438805	11023.05 ± 5217.18	57.86	33.85
fGobGob1	fGobGob1	3899080	50179899276	12869.68 ± 5807.76	58.58	34.76
fGobNig1	fGobNig1	1969002	25262532426	12830.12 ± 5557.99	61.43	29.58
fHypImm3	fHypImm3	2533895	22433109980	8853.21 ± 3935.16	69.59	30.83
fLabBer1	fLabBer1	1989421	24533680989	12332.07 ± 5142.96	53.71	34.29
fLabMix1	fLabMix1	9069139	85998259173	9482.52 ± 4177.14	17.94	123.23
fLipPho2	fLipPho2	2771996	27766916199	10016.94 ± 5155.73	60.59	38.65
fMicPou1	fMicPou1	1595357	15552368287	9748.52 ± 5165.83	59.38	33.69
fMicVar1	fMicVar1	2190990	24553189204	11206.44 ± 5261.59	67.55	35.45
fPhoGun1	fPhoGun1	3386297	40967520967	12098.03 ± 4482.39	50.63	69.92
fPhoPho1	fPhoPho1	2376477	28830595961	12131.65 ± 4407.13	63.53	30.5
fPlaFle2	fPlaFle2	1969421	27066566353	13743.41 ± 4755.08	60.72	45.72
fPlePla1	fPlePla1	1449828	20070938463	13843.67 ± 5214.22	53.04	32.04
fPolPol2	fPolPol2	3595889	40072678262	11144.03 ± 4927.37	56.38	68.98
fPunPun2	fPunPun2	2108982	24547097042	11639.31 ± 4853.64	58.6	52.73
fRutRut2	fRutRut2	4226093	50735299332	12005.25 ± 5943.65	54.9	46.32
fSalTru1	fSalTru1	2735356	29125417943	10647.76 ± 673.52	62.79	13.43
fScoMax1	fScoMax1	1909296	20475347178	10724.03 ± 5377.07	59.77	37.32
fScoSco1	fScoSco1	2096348	19448030658	9277.10 ± 5412.98	62.2	26.56
fSprSpr1	fSprSpr1	4456807	43957466401	9863.00 ± 4829.73	60.98	53.47
fSquCep2	fSquCep2	2083711	25773208728	12368.90 ± 5294.01	57.21	23.66
fSymMel2	fSymMel2	1736294	19137901431	11022.27 ± 4810.31	64.73	30.58
fSynAcu2	fSynAcu2	2016293	26392561388	13089.65 ± 3674.10	64.35	79.62
fTauBub2	fTauBub2	1923334	23511609834	12224.40 ± 5184.69	45.84	38.23
fTelBon1	fTelBon1	3649207	34222265879	9378.00 ± 5798.32	59.43	34.86
fThuMac1	fThuMac1	2639112	35752867916	13547.31 ± 5549.84	41.72	45.97
fTraTra1	fTraTra1	4486055	45479126994	10137.89 ± 2087.16	72.22	57.52
fZeuFab8	fZeuFab8	3999135	34080088481	8521.86 ± 4793.29	59.94	43.62
gfAgaBisp1	gfAgaBisp1	81378	658203281	8088.22 ± 4748.64	72.52	21.71
gfClaFumo1	gfClaFumo1	1799115	22098911279	12283.21 ± 3188.54	65.86	457.71
gfFlaVelt1	gfFlaVelt1	468178	4402042633	9402.50 ± 1938.62	81.66	118.16
gfLaeSulp1	gfLaeSulp1	368641	4072206155	11046.54 ± 6104.87	56.85	108.85
gfPleOstr1	gfPleOstr1	251074	2482964778	9889.37 ± 5683.85	47.97	61.42
gfPorCaly1	gfPorCaly1	2491438	22153646748	8891.91 ± 3273.00	69.16	668.7
glLicPygm2	glLicPygm2	280885	2055444010	7317.74 ± 2285.77	71.17	63.4
grCorFumo1	grCorFumo1	2072613	24095589328	11625.71 ± 5872.39	53.68	702
grSimLame1	grSimLame1	2591339	26612784993	10269.90 ± 6031.11	61.44	927.05
grTriPseu1	grTriPseu1	917510	8701654641	9483.99 ± 5342.40	58.6	264.23
gsMetZobe1	gsMetZobe1	1558116	17223685420	11054.17 ± 3899.44	60.28	1266.24
gzEntParv1	gzEntParv1	1721982	21741422484	12625.81 ± 5484.21	49.78	564.91
gzMucPiri1	gzMucPiri1	324283	2626146568	8098.32 ± 4995.75	65.23	75.4
icAdaBipu1	icAdaBipu9	4615315	44234050204	9584.19 ± 4680.34	64.95	105.14
icAdaBipu1	icAdaBipu20	4006633	36603070323	9135.62 ± 5112.80	67.57	87.01
icAdaBipu1	icAdaBipu15	3839416	32207434969	8388.63 ± 4969.99	72.38	76.56
icAdaBipu1	icAdaBipu1	2353053	21130349650	8979.97 ± 2849.28	67.35	50.23
icAdaBipu1	icAdaBipu36	2212948	19985448936	9031.14 ± 5972.51	62.75	47.51
icAdaBipu1	icAdaBipu33	1999793	18013901277	9007.88 ± 5787.47	68.34	42.82
icAdaBipu1	icAdaBipu32	1869699	15760129217	8429.23 ± 5780.66	63.77	37.46
icAdaBipu1	icAdaBipu31	1563575	13073044769	8361.00 ± 5734.21	69.76	31.07
icAdaBipu1	icAdaBipu29	1313562	12703073330	9670.71 ± 6137.65	67.62	30.2
icAdaBipu1	icAdaBipu34	1161549	10676616439	9191.71 ± 5443.13	75.46	25.38
icAdaBipu1	icAdaBipu28	1463763	10567783387	7219.60 ± 5067.10	70.68	25.12
icAdaBipu1	icAdaBipu6	654907	9765501303	14911.28 ± 5357.28	45.81	23.21
icAgoFuli1	icAgoFuli1	2055503	19232793817	9356.73 ± 5587.33	64.56	31.21
icAgrCyan1	icAgrCyan1	1802392	14178677328	7866.59 ± 2894.52	77.96	56.03
icAgrMuri1	icAgrMuri1	3584059	42274269355	11795.08 ± 5404.61	54.7	29.55
icAnaMacu3	icAnaMacu3	1809142	21303177418	11775.29 ± 4070.36	71.81	30.61
icApoCory1	icApoCory1	2258748	25032101269	11082.29 ± 3553.28	59.87	61.79
icCanRufa1	icCanRufa1	913086	5651362061	6189.30 ± 3237.45	80.79	17.45
icCanRust1	icCanRust3	2002912	22583595830	11275.38 ± 5219.62	66.97	54.12
icCanRust1	icCanRust1	1911376	19235125150	10063.50 ± 3641.56	64.67	46.09
icCetAura1	icCetAura1	2183505	25913123144	11867.67 ± 4340.11	61.77	57.15
icChrOric1	icChrOric1	3933671	29846551252	7587.45 ± 3833.25	72.82	22.21
icCocSept1	icCocSept1	2601634	30995000160	11913.67 ± 4113.27	53.87	82.83
icCryMora2	icCryMora2	1445599	16228948683	11226.45 ± 4419.38	65.89	36.13
icElmAene2	icElmAene2	1722810	15386103768	8930.82 ± 1770.79	76.65	33.42
icHalSede1	icHalSede1	4553491	48584805220	10669.79 ± 4004.92	66.41	55.76
icHarAxyr1	icHarAxyr1	1711466	22532032978	13165.34 ± 4814.13	47.52	58.27
icLagHirt1	icLagHirt1	2165494	23723388377	10955.19 ± 4025.51	71.83	77.41
icLeiSpin1	icLeiSpin1	1800489	14437469618	8018.64 ± 4004.13	68.34	68.83
icLepMacu1	icLepMacu1	5500097	59514472757	10820.62 ± 2944.41	65.11	31.23
icLocCapr1	icLocCapr1	2535134	27161779933	10714.14 ± 4357.26	69	50.85
icLocCrat2	icLocCrat2	1816531	25022060461	13774.64 ± 4604.56	62.27	34.76
icMalBipu1	icMalBipu1	1802292	16899414573	9376.62 ± 3104.31	62.03	33.72
icMelMelo1	icMelMelo1	6598558	55107169847	8351.40 ± 3620.65	66.98	34.47
icNebBrev1	icNebBrev1	1341027	18097998261	13495.63 ± 4140.84	48.92	95.63
icNebSali1	icNebSali1	978047	11404446048	11660.43 ± 4341.18	49.16	59.01
icOcyOlen1	icOcyOlen1	4430840	37007938405	8352.35 ± 3559.85	68.21	36.5
icOphArdo1	icOphArdo1	1614577	22426818648	13890.21 ± 6071.04	45.12	26.06
icPhiCogn1	icPhiCogn1	2530425	25814998974	10201.84 ± 4406.22	62.51	30.85
icPodAlpi1	icPodAlpi1	1661991	20180124255	12142.14 ± 4469.10	46.67	31.12
icPolCerv1	icPolCerv1	3207660	26386546290	8226.10 ± 5001.53	67.62	38.59
icPteMadi1	icPteMadi1	1600621	23801972358	14870.46 ± 4256.18	45.35	35.59
icPteMadi1	icPteMadi3	1702502	23631403231	13880.40 ± 4890.46	57.91	35.34
icPteNige1	icPteNige1	244443	2275312451	9308.15 ± 3836.24	68.25	3.66
icPyrSerr1	icPyrSerr1	950421	6874512777	7233.12 ± 3484.58	73.03	29.75
icRhaFulv1	icRhaFulv1	1301648	15068925241	11576.81 ± 3910.88	56.25	37.17
icSilAtra2	icSilAtra2	2720260	33323301977	12250.04 ± 4638.22	53.16	30.12
idAcrOrbc1	idAcrOrbc1	1763196	22195087058	12587.99 ± 5317.06	49.38	105.63
idBacElon1	idBacElon1	1957993	26073790314	13316.59 ± 4496.15	54.18	59.12
idBelPand1	idBelPand1	2376445	30988468103	13039.84 ± 4888.63	50.29	53.04
idBerChal2	idBerChal2	1786385	21970362716	12298.78 ± 4972.77	62.2	41.76
idBibMarc1	idBibMarc1	2620283	17220382843	6571.96 ± 3403.73	75.19	53.98
idBleFall4	idBleFall4	2246520	24973976594	11116.74 ± 3749.91	66.06	56.53
idBomDisc1	idBomDisc1	854943	6207431867	7260.64 ± 3772.46	74.4	25.18
idBomMajo1	idBomMajo1	1672391	17448471171	10433.25 ± 3335.24	65.07	69.41
idBraLaph1	idBraLaph1	2233615	26342245106	11793.55 ± 4630.82	64.88	25.32
idCalVomi1	idCalVomi1	1157125	15461357672	13361.87 ± 5441.46	46.4	22.29
idCheImpr3	idCheImpr3	1153104	14100538474	12228.33 ± 5109.69	67.51	37.89
idChePaga1	idChePaga1	1447901	18016438867	12443.14 ± 4350.65	54.12	51.8
idCheUrba1	idCheUrba1	1788688	16315422851	9121.45 ± 3452.79	70.68	31.19
idCheVern2	idCheVern2	2404838	28370162299	11797.12 ± 4941.64	65.67	68.97
idCheVulp2	idCheVulp2	1557181	20598091655	13227.81 ± 4197.46	56.36	52.64
idChrBici1	idChrBici1	2434826	25775038762	10585.99 ± 4369.84	61.76	29.07
idCisGlob1	idCisGlob1	3840675	39006852733	10156.25 ± 3531.08	66.24	58.02
idCluTigr1	idCluTigr1	1792949	26632761885	14854.17 ± 5411.90	50.47	31.41
idCoePili4	idCoePili4	1807452	19225842339	10636.99 ± 3964.77	71.46	75.84
idCorMarg1	idCorMarg1	2315449	24743715576	10686.36 ± 2873.96	67.26	25.56
idCriBerb1	idCriBerb1	1302683	13746127207	10552.17 ± 3706.33	65.44	34.68
idDasAlbo1	idDasAlbo1	1284938	12897003812	10037.06 ± 6258.16	66	20.23
idEpiBalt1	idEpiBalt1	1133235	14828535437	13085.14 ± 4940.36	49.29	28.29
idEpiEuco1	idEpiEuco1	1927797	21078916661	10934.20 ± 4882.68	68.52	41.1
idEpiGros1	idEpiGros1	1309427	15593492553	11908.64 ± 3868.33	60	28.74
idEpiSucc1	idEpiSucc1	1733319	18353803540	10588.82 ± 5157.47	72.44	48.93
idEriArbu1	idEriArbu1	707435	8292781422	11722.32 ± 5095.56	44.48	19.83
idEriPert2	idEriPert2	1134907	12958975422	11418.54 ± 4352.86	50.75	29.57
idEriSepu1	idEriSepu1	1606166	14452997996	8998.45 ± 5069.60	61.66	39.62
idEriTena2	idEriTena2	1524067	16700634342	10957.94 ± 3241.21	58.14	37.29
idEupCoro1	idEupCoro1	1669181	17033079064	10204.45 ± 3349.28	64.96	27.96
idEupLati1	idEupLati1	1666375	20735240707	12443.32 ± 5037.11	59.81	27.35
idGymRotn1	idGymRotn1	2035751	22446300031	11026.05 ± 3772.53	57.56	30.38
idLeuLate1	idLeuLate1	2237646	15715898010	7023.41 ± 4395.19	67.07	26.1
idLypDubi1	idLypDubi1	1342741	14646049178	10907.58 ± 4885.48	73.87	25.04
idMacAtri3	idMacAtri3	1201817	9782852267	8140.05 ± 4724.12	68.83	46.93
idMelAuri2	idMelAuri2	1253374	12929893549	10316.07 ± 4796.99	74.3	35.26
idMelMell2	idMelMell2	1623993	19386966529	11937.84 ± 5389.17	59.05	27.5
idMyaFlor2	idMyaFlor2	957945	13258172470	13840.22 ± 5192.72	41.47	29.39
idMyoTess1	idMyoTess1	1329242	14814071058	11144.75 ± 5082.41	67.43	79.32
idNemNigr1	idNemNigr1	1999808	24369992521	12186.17 ± 4767.34	66.51	35.43
idNeoCyan1	idNeoCyan1	2295317	21882646799	9533.61 ± 4990.18	71.58	59.89
idNeoInte1	idNeoInte1	2197743	22509481136	10242.09 ± 3430.27	69.97	39.23
idNepAppe1	idNepAppe1	1847816	31642114913	17124.06 ± 4944.62	56.22	29.34
idNepFlae1	idNepFlae1	4027638	32700067082	8118.92 ± 3202.69	67.35	34.85
idNepScut1	idNepScut1	1864096	23602265276	12661.51 ± 5036.94	67.17	40.25
idNowFero1	idNowFero1	1992049	25642880265	12872.62 ± 4906.28	51.31	41.78
idPheCory1	idPheCory1	1958987	20349643558	10387.84 ± 4453.88	71.85	24.14
idPhyMeln1	idPhyMeln1	1219374	17361604030	14238.13 ± 4920.78	53.79	24.36
idPlaAlba1	idPlaAlba1	2156732	31907748277	14794.49 ± 4415.87	52.07	49.16
idPlaAlba1	idPlaAlba4	2306059	21631988761	9380.50 ± 2584.41	74.21	33.33
idPlaAlba1	idPlaAlba3	1865482	21128185162	11325.86 ± 3902.03	63.65	32.55
idPoeNobi2	idPoeNobi1	1297604	11237253276	8660.00 ± 1692.20	81.69	12.19
idPoeNobi2	idPoeNobi2	1814598	21238496543	11704.24 ± 4588.36	67.71	23.03
idPolAmen1	idPolAmen1	3751490	41117817724	10960.40 ± 5333.79	62.85	33.12
idPolAngu1	idPolAngu1	3642592	39436668510	10826.54 ± 5649.16	62.72	29.44
idPolDomi1	idPolDomi1	1929538	22504122349	11662.96 ± 5049.32	69.48	22.79
idProAzur1	idProAzur1	3161293	33986424471	10750.80 ± 6357.68	57.98	39.87
idRhiCamp1	idRhiCamp1	1869175	26521615653	14188.94 ± 4871.30	45.39	40.69
idSarCaer1	idSarCaer1	1593090	13927294549	8742.31 ± 4572.86	62.38	23.95
idSarRose1	idSarRose1	2497978	25311283488	10132.71 ± 5493.48	59.41	48.51
idSarSubv1	idSarSubv1	3629914	41295837663	11376.53 ± 4637.67	64.2	60.89
idSarVari1	idSarVari1	1988528	21447648441	10785.69 ± 4677.99	62.58	31.3
idScaPyra1	idScaPyra1	2869685	38205103056	13313.34 ± 4435.56	53.07	122.94
idSicFerr1	idSicFerr1	1351696	13955869811	10324.71 ± 4803.86	50.14	57.23
idSphTaen1	idSphTaen1	1699014	21457641443	12629.47 ± 4358.19	44.4	35.79
idStoLuna1	idStoLuna1	2112467	27048703063	12804.32 ± 4858.29	48.26	38.14
idSuiVari3	idSuiVari3	2080463	23065139351	11086.54 ± 4708.15	59.91	89.64
idSyrPipi1	idSyrPipi7	2442506	30418850126	12453.95 ± 4432.14	65.15	97.62
idSyrPipi1	idSyrPipi8	2323434	29441456732	12671.53 ± 4224.36	65.58	94.48
idSyrPipi1	idSyrPipi2	2712268	27467802857	10127.25 ± 2962.69	70.7	88.15
idSyrPipi1	idSyrPipi11	2549211	27177124592	10660.99 ± 4314.38	70.37	87.21
idSyrPipi1	idSyrPipi10	2439756	26995230658	11064.73 ± 4146.05	70.04	86.63
idSyrPipi1	idSyrPipi9	2335654	26658664520	11413.79 ± 4056.90	69.4	85.55
idSyrPipi1	idSyrPipi6	2524503	25452351978	10082.12 ± 3584.50	68.9	81.68
idSyrPipi1	idSyrPipi5	2674878	23802483766	8898.53 ± 2152.63	74.62	76.38
idSyrPipi1	idSyrPipi1	1131507	13891661170	12277.13 ± 4307.25	60.12	44.58
idTacFera2	idTacFera2	1971048	29808530726	15123.19 ± 4715.10	51.55	40.42
idTacLuri1	idTacLuri1	1972055	20821096865	10558.07 ± 4756.38	71.14	23.91
idTheAcut1	idTheAcut1	1587180	19522102604	12299.87 ± 4599.10	50.28	28.78
idTheAtra2	idTheAtra2	627844	9887784985	15748.79 ± 5047.82	59.52	46.06
idTheSoli1	idTheSoli1	2179691	17872750317	8199.67 ± 3882.07	71.96	44.83
idVolBomb1	idVolBomb1	1596746	16929064091	10602.23 ± 4648.01	63.93	14.55
idVolInan1	idVolInan1	2268198	25074049420	11054.61 ± 4450.73	62.33	27.38
idVolInfl1	idVolInfl1	1620771	18770184057	11581.02 ± 5114.80	57.67	25.8
idXanPedi1	idXanPedi1	3229266	33449516683	10358.24 ± 3779.52	65.35	37.5
idXylSylv2	idXylSylv2	1203692	15415282346	12806.67 ± 4707.91	47.49	34.85
ihAcaHaem1	ihAcaHaem1	3971728	36989802425	9313.28 ± 5322.51	66.55	51.81
ihAelAcum1	ihAelAcum1	2169817	29464422070	13579.22 ± 3844.23	44.43	30.78
ihDrePlat2	ihDrePlat2	2080187	15915768761	7651.12 ± 1603.54	74.71	56.09
iHemFuc1	iHemFuc2	874875	8763930730	10017.35 ± 593.44	60.09	20.92
ihGonAcut1	ihGonAcut1	2839002	27213450384	9585.57 ± 3613.46	58.77	28.1
ihRhaNebu1	ihRhaNebu1	38038	478144630	12570.18 ± 4500.70	66.35	0.5
iiAthCine2	iiAthCine2	2426828	23276048148	9591.14 ± 1993.63	78.82	34.14
iiGlyPell1	iiGlyPell1	5831426	37680856335	6461.69 ± 2433.66	75.58	37.93
iiLimLuna2	iiLimLuna2	3964354	43422636093	10953.27 ± 4016.96	57.72	36.46
iiLimMarm1	iiLimMarm1	4231917	44878681777	10604.81 ± 3912.18	55.98	28.53
iiLimRhom1	iiLimRhom1	3760537	39452118725	10491.09 ± 5789.38	58.42	26.11
ilAbrTril1	ilAbrTril1	1071407	13539960119	12637.55 ± 5591.92	69.74	39.66
ilAbrTrip1	ilAbrTrip1	1509438	20535011986	13604.41 ± 5146.91	36.76	57.03
ilAceEphe1	ilAceEphe1	2052432	21633760740	10540.55 ± 6116.08	68.29	66.53
ilAchFlav2	ilAchFlav2	1944710	21425447966	11017.30 ± 5090.54	68.49	50.29
ilAclCris2	ilAclCris2	1332342	16663531258	12506.95 ± 4641.07	71.58	37.92
ilAclEmar1	ilAclEmar1	1259451	15909046515	12631.73 ± 4486.47	49.56	26.96
ilAclLite1	ilAclLite1	1471624	17075688894	11603.30 ± 4686.22	65.85	29.85
ilAclSpar1	ilAclSpar1	1398249	19206614741	13736.19 ± 5609.69	51.25	39.14
ilAcrAcer1	ilAcrAcer1	1335870	17336005798	12977.32 ± 5232.48	50.99	40.69
ilAcrLepo1	ilAcrLepo1	1641702	19633669753	11959.34 ± 3789.09	71.66	46.18
ilAcrPsix1	ilAcrPsix1	1473977	18178183728	12332.75 ± 5541.90	60.02	47.12
ilAcrSuav1	ilAcrSuav1	1805916	15892015726	8799.98 ± 5764.63	70.09	26.65
ilAglIoxx1	ilAglIoxx1	1950418	25135668232	12887.32 ± 4110.86	53.77	68.62
ilAglUrti1	ilAglUrti1	1616176	22132031319	13694.07 ± 4376.19	48.83	61.07
ilAgoAren1	ilAgoAren1	2148651	22802920122	10612.67 ± 5616.38	59.24	44.09
ilAgoSubp1	ilAgoSubp1	1502713	17337058676	11537.17 ± 5604.23	52.72	28.92
ilAgrAura1	ilAgrAura1	3072760	34699596161	11292.65 ± 5870.75	55.01	74.62
ilAgrCirc1	ilAgrCirc1	1312565	19266087094	14678.20 ± 5746.79	45.67	35.13
ilAgrLeuc1	ilAgrLeuc1	2249422	25622502495	11390.71 ± 4934.64	63.77	54.74
ilAgrLota1	ilAgrLota1	2134930	25243626086	11824.10 ± 4448.64	63.97	41.47
ilAgrMaci1	ilAgrMaci1	1433873	18731327173	13063.45 ± 4479.25	52.76	29.23
ilAgrMarg1	ilAgrMarg1	2381704	17046833119	7157.41 ± 4470.28	71.24	35.54
ilAgrPuta1	ilAgrPuta1	670972	7866965968	11724.73 ± 4861.46	55.31	15.83
ilAgrTris1	ilAgrTris1	1648179	22493951510	13647.76 ± 6462.91	49.93	30.52
ilAlcRepa2	ilAlcRepa2	51682	584655635	11312.56 ± 3933.20	66.19	1.59
ilAllOxya1	ilAllOxya1	2451563	32050176853	13073.36 ± 5717.20	56.64	73.14
ilAlsAesc1	ilAlsAesc1	1767056	18759018289	10615.97 ± 5059.35	66.06	23.64
ilAmpBerb1	ilAmpBerb1	1978207	23684741025	11972.83 ± 5271.94	46.07	42.64
ilAmpLuce6	ilAmpLuce6	1935845	23036254120	11899.84 ± 5288.92	63.76	37.55
ilAmpOcul1	ilAmpOcul1	2318245	25274305786	10902.34 ± 5427.68	65.53	39.82
ilAmpTrag2	ilAmpTrag2	3098759	32826055224	10593.29 ± 4004.47	54.39	42.73
ilAnaInnx2	ilAnaInnx2	2092545	21732298366	10385.58 ± 4019.04	69.52	79.92
ilAnoMund1	ilAnoMund1	1927779	24730979684	12828.74 ± 5607.96	64.69	28.37
ilAntCard3	ilAntCard3	1908866	23475582858	12298.18 ± 4455.85	52.12	70.42
ilAntChix2	ilAntChix2	1466896	15447622980	10530.82 ± 4684.28	66.11	25.79
ilAntDeri1	ilAntDeri1	1976324	23449957910	11865.44 ± 4972.03	64.06	69.62
ilApaEpom1	ilApaEpom1	2025382	26449424943	13058.98 ± 5765.18	59.67	46.13
ilApaMono1	ilApaMono1	1040789	13991020797	13442.71 ± 4681.89	48.25	25.86
ilApaSord1	ilApaSord1	1789185	23170388210	12950.25 ± 6085.88	62.14	39.83
ilApeSyri1	ilApeSyri1	1758686	25702420820	14614.56 ± 5634.15	41.6	51.24
ilAplEffo1	ilAplEffo1	1294182	18561900840	14342.57 ± 6385.01	49.43	56.93
ilApoBetu1	ilApoBetu1	1714489	22236704600	12969.87 ± 5744.00	45.91	35.76
ilApoBist1	ilApoBist1	2363664	25842236522	10933.13 ± 4428.37	72.09	71.62
ilApoCapr1	ilApoCapr1	2021480	21539223284	10655.18 ± 5215.27	70.43	31.73
ilApoCrat1	ilApoCrat1	2144150	23166026245	10804.29 ± 3555.09	60.7	105.83
ilApoHisp1	ilApoHisp1	1194042	13424524941	11242.93 ± 3027.60	72.18	33.34
ilApoLima1	ilApoLima1	1725503	17761827694	10293.71 ± 5332.49	64.1	23.85
ilApoLuen1	ilApoLuen1	2916620	33075288642	11340.28 ± 4861.15	62.17	35.88
ilApoNigr3	ilApoNigr3	1710697	20558486056	12017.61 ± 5086.56	58.11	29.49
ilApoTurb1	ilApoTurb1	2449452	22145357988	9040.94 ± 3389.70	64.05	33.73
ilArcCraa1	ilArcCraa1	1894566	20447912467	10792.93 ± 4685.54	69.93	37.39
ilArcXylo1	ilArcXylo1	1754446	24265985187	13831.14 ± 5040.01	44.45	42.29
ilAriAges1	ilAriAges2	1764020	23028899357	13054.78 ± 4713.02	49.23	58.59
ilAriAges1	ilAriAges1	1328679	21811626049	16416.02 ± 5056.56	44.54	55.5
ilAriArta2	ilAriArta2	1439920	11787166850	8185.99 ± 5537.37	68.68	28.54
ilAteCent1	ilAteCent1	2219033	27128619542	12225.42 ± 4177.28	54.04	30.67
ilAthMouf1	ilAthMouf1	2327212	27312980297	11736.35 ± 5330.49	52.53	34.56
ilAutGamm1	ilAutGamm1	901294	12816685829	14220.32 ± 5541.59	47.33	38.29
ilAutPulc1	ilAutPulc1	1399781	17906275216	12792.20 ± 4362.47	39.25	49.25
ilBemIchn1	ilBemIchn1	1354649	15306317715	11299.10 ± 5133.40	48.15	31.1
ilBicAnyn1	ilBicAnyn1	1270151	8795505652	6924.77 ± 4946.04	75.19	20.3
ilBisBetu1	ilBisBetu1	1317063	10482705129	7959.15 ± 4964.83	68.64	27.18
ilBlaAdus2	ilBlaAdus2	1817104	27013774948	14866.39 ± 6412.60	44.11	52.73
ilBlaLact1	ilBlaLact1	1544488	18237924716	11808.40 ± 4410.24	61.76	33.7
ilBolSele5	ilBolSele5	1544911	22516209443	14574.44 ± 5922.96	44.22	62.76
ilBraVimi1	ilBraVimi1	4090914	37187934698	9090.37 ± 3427.33	68.95	50.16
ilCalPalu1	ilCalPalu1	2330594	25426417345	10909.84 ± 5774.96	54.81	36.67
ilCamMarg1	ilCamMarg1	2980606	40785527024	13683.64 ± 4478.91	57.33	128.87
ilCarClav1	ilCarClav1	1485407	20210027050	13605.72 ± 5052.68	50.61	45.28
ilCarKade1	ilCarKade1	1247814	15029626729	12044.77 ± 4625.62	52.45	37.46
ilCarPala2	ilCarPala2	1687813	17304866565	10252.83 ± 4631.28	68.39	46.27
ilCarQuer1	ilCarQuer1	2357500	27327405507	11591.69 ± 3792.55	52.45	70.89
ilCatFrax1	ilCatFrax1	2980596	31642714604	10616.24 ± 5369.73	64.3	42.59
ilCelArgi3	ilCelArgi3	1408324	15244101634	10824.29 ± 5006.90	50.79	32.07
ilChaFerr1	ilChaFerr1	1912613	15049217618	7868.41 ± 5130.89	65.54	20.45
ilCheLega1	ilCheLega1	1435248	16203323715	11289.56 ± 4636.28	59.74	54.89
ilChlSite2	ilChlSite2	1413116	16703646899	11820.44 ± 5214.60	61.47	40.11
ilChrCulm1	ilChrCulm1	2055392	28162932185	13701.98 ± 5497.74	45.15	45.95
ilCloCurt1	ilCloCurt1	1229090	11932558016	9708.45 ± 4940.05	53.11	25.15
ilColCroc2	ilColCroc2	1704505	21780729531	12778.33 ± 4121.69	50.9	71.3
ilColFlav1	ilColFlav1	1986557	21784335816	10965.88 ± 4340.79	71.21	23.79
ilConVacc3	ilConVacc3	1940173	25981786224	13391.48 ± 4916.15	54.16	37.75
ilCosPyra2	ilCosPyra2	1607248	17048530501	10607.28 ± 5157.73	62.36	22.34
ilCosTrap1	ilCosTrap1	2901643	35773528500	12328.71 ± 4625.69	54.31	45.48
ilCraLigu1	ilCraLigu1	708949	9411912107	13275.87 ± 5583.92	45.03	23.29
ilCroElin1	ilCroElin1	2098679	22840016486	10883.04 ± 5159.75	59.98	56.98
ilCyaSemi1	ilCyaSemi1	1503792	18418603773	12248.11 ± 4524.59	49.46	44.19
ilCybMeso1	ilCybMeso1	1899537	18818434435	9906.85 ± 3984.50	71.31	21.01
ilCydAmpl1	ilCydAmpl1	2670383	29616244731	11090.64 ± 3077.52	71.38	63.8
ilCydSple1	ilCydSple1	1541986	19980607004	12957.71 ± 6302.25	43.9	36.45
ilCydStro3	ilCydStro3	1448225	18029680846	12449.50 ± 4679.44	65.52	37.48
ilCydStro3	ilCydStro1	828725	11955745166	14426.67 ± 5558.57	66.45	24.86
ilDeiPorc1	ilDeiPorc1	3501535	37906716677	10825.74 ± 4565.49	55.32	99.92
ilDiaChry1	ilDiaChry1	927873	13065434522	14081.06 ± 6170.47	40.89	36.01
ilDiaMend1	ilDiaMend1	2425899	27220524120	11220.80 ± 3484.12	66.11	38.7
ilDiaRubi1	ilDiaRubi1	1890685	19894150709	10522.19 ± 5347.82	65.64	34.6
ilDicOoxx2	ilDicOoxx2	2283771	24685185480	10808.96 ± 5478.41	64.77	27.78
ilDilCaer1	ilDilCaer1	2007817	22788344519	11349.81 ± 4589.66	68.23	31.25
ilDreFalc1	ilDreFalc1	2142551	23483585206	10960.57 ± 4931.81	67.98	75.33
ilDryErem1	ilDryErem1	1352493	18884710638	13962.89 ± 5516.00	48.17	28.72
ilDryLabe1	ilDryLabe1	2129059	23083515294	10842.12 ± 4354.95	69.64	32.02
ilDryRufi1	ilDryRufi1	1615917	18164778852	11241.16 ± 4101.63	67.23	51.29
ilEclSila1	ilEclSila1	1154586	16193289601	14025.19 ± 5466.79	43.36	55.17
ilEilCani1	ilEilCani1	1980363	27845238374	14060.67 ± 4412.97	54.73	40.17
ilEilDepe1	ilEilDepe1	2409858	32646763543	13547.17 ± 5489.81	45.33	56.68
ilEilSoro1	ilEilSoro1	2340683	30925488647	13212.16 ± 5310.07	51.9	45.66
ilEleCory1	ilEleCory1	2066847	23848926991	11538.80 ± 4908.14	61.03	72.26
ilEleSimi1	ilEleSimi1	1973145	23883143221	12104.10 ± 5632.98	62.64	32.98
ilEmmMono1	ilEmmMono1	859142	11369461840	13233.51 ± 6220.20	44.42	40.35
ilEndFlam1	ilEndFlam1	769075	8989394650	11688.58 ± 5003.08	63.02	20.56
ilEnnFusc2	ilEnnFusc2	1734926	23110218052	13320.58 ± 4356.55	47.51	54.34
ilEnnQuei1	ilEnnQuei1	1833349	22893121284	12487.05 ± 5223.83	48.65	48.6
ilEpiBilu1	ilEpiBilu1	1473808	17335307575	11762.26 ± 5043.47	60.26	28.64
ilEpiDema1	ilEpiDema1	1880036	20659750770	10989.02 ± 5102.44	65.87	30.81
ilEpiNise2	ilEpiNise2	1863773	21868222859	11733.31 ± 5897.77	59.78	40.58
ilEpiRame1	ilEpiRame1	1739609	22866476311	13144.61 ± 5613.89	46.92	33.36
ilEraDefo1	ilEraDefo1	1135528	11658569224	10267.09 ± 3688.10	68.54	23.34
ilEreAeth2	ilEreAeth1	430317	5515970778	12818.39 ± 5473.37	56.63	13.12
ilEreAeth2	ilEreAeth2	1829095	14779724991	8080.35 ± 4811.55	78.77	35.15
ilEreLige1	ilEreLige1	1761436	16910924717	9600.65 ± 3947.37	65.7	34.91
ilEryTage1	ilEryTage1	757921	9097877326	12003.73 ± 4360.67	53.99	29.2
ilEspSulp1	ilEspSulp1	2000002	26540257371	13270.12 ± 4834.20	61.49	62.2
ilEucMixx1	ilEucMixx1	3714558	44119261403	11877.39 ± 4931.23	49.23	19.95
ilEudLacu3	ilEudLacu3	454922	6739168923	14813.90 ± 5683.15	44.86	10.66
ilEudProf1	ilEudProf1	2103675	24425866547	11611.05 ± 4361.88	66.91	38.19
ilEugGlar6	ilEugGlar6	2017577	25299028882	12539.31 ± 3963.18	63.77	43.55
ilEulPrun1	ilEulPrun1	1328559	17814888738	13409.18 ± 4836.45	49.84	71.06
ilEulTest2	ilEulTest2	1750749	18242526513	10419.84 ± 4595.00	69.66	62
ilEupAbbr2	ilEupAbbr2	1512365	14773532824	9768.50 ± 4561.75	70.2	41.91
ilEupCent1	ilEupCent1	1004149	9484371955	9445.18 ± 4274.81	71.23	22.19
ilEupDodo1	ilEupDodo1	1472493	18054423510	12261.13 ± 4691.90	69.44	53.73
ilEupExig1	ilEupExig1	1668418	20436882504	12249.26 ± 4887.05	68.1	57.9
ilEupInsi1	ilEupInsi1	1902553	19788389898	10400.97 ± 3645.32	74.36	47.46
ilEupLuci1	ilEupLuci1	2137980	17080547747	7989.11 ± 5178.11	61.79	27.47
ilEupSimi1	ilEupSimi1	2196124	35233599705	16043.54 ± 5562.39	39.98	73.24
ilEupTran1	ilEupTran1	2067944	24376917089	11788.00 ± 5749.89	59.14	57.03
ilEupVulg1	ilEupVulg1	1852568	19326420801	10432.23 ± 4764.64	66.18	45
ilEuzPing2	ilEuzPing2	1452604	15971416618	10995.02 ± 5647.98	57.92	36.7
ilFabAdip1	ilFabAdip1	1642101	23021093637	14019.29 ± 4861.96	48.69	51.57
ilFisYpsi1	ilFisYpsi1	729285	6422789542	8806.97 ± 5930.05	60.28	10.04
ilFurFurc1	ilFurFurc1	1549993	19473319831	12563.49 ± 4860.69	48.56	28.75
ilGanPyra1	ilGanPyra1	830562	8765947345	10554.24 ± 5122.45	74.57	31.55
ilGlaAlex1	ilGlaAlex1	2094445	25025233832	11948.38 ± 5168.84	51.74	43.82
ilGriApri1	ilGriApri1	1569149	22041799678	14046.98 ± 4704.29	51.96	32.48
ilGymRufi1	ilGymRufi1	2267595	25669889173	11320.31 ± 3496.29	58.53	60.49
ilHabPyri1	ilHabPyri1	1441979	20710499353	14362.55 ± 4790.99	45.35	54.96
ilHecDyso1	ilHecDyso1	2107954	28439656543	13491.59 ± 4547.75	45.19	48.16
ilHedSali1	ilHedSali1	1161944	16504914661	14204.57 ± 4029.08	38.47	26.94
ilHemAest2	ilHemAest2	2543748	17191498042	6758.33 ± 2422.37	76.18	36.2
ilHemChry1	ilHemChry1	1950136	20764122974	10647.53 ± 4753.82	63.07	50.95
ilHerTari1	ilHerTari1	1313337	17638045170	13429.95 ± 4958.63	50.4	23.53
ilHesComm1	ilHesComm1	864695	13281767674	15360.06 ± 5714.15	45.13	28.86
ilHipSeme1	ilHipSeme1	2082786	22645991342	10872.93 ± 5995.60	57.66	60.48
ilHofPseu3	ilHofPseu3	1928878	22163344397	11490.28 ± 5038.94	62.57	59.38
ilHydFurc1	ilHydFurc1	1379219	17272895551	12523.68 ± 4220.57	56.8	43.15
ilHydMica1	ilHydMica1	1145210	15757377589	13759.38 ± 5457.85	49.9	30.97
ilHylFasc1	ilHylFasc1	1884903	23062041122	12235.13 ± 3931.76	47.69	74.22
ilHypCost1	ilHypCost1	3627339	39693355884	10942.83 ± 3566.13	66.29	50.74
ilHypProb1	ilHypProb1	888305	14556065510	16386.34 ± 5322.27	32.69	24.61
ilIdaAver1	ilIdaAver1	1775780	23641009588	13313.03 ± 4225.75	51.34	58.3
ilIncMasc1	ilIncMasc1	1476215	17453922019	11823.43 ± 4474.07	65.42	33.23
ilLacWlai2	ilLacWlai2	2002582	18261494207	9118.97 ± 7086.57	64.68	21.76
ilLamSuff1	ilLamSuff1	1917018	22692759812	11837.53 ± 3619.50	64.83	41.21
ilLaoPopu1	ilLaoPopu1	1780311	17250271267	9689.47 ± 4111.68	56.03	32.38
ilLasFlex1	ilLasFlex1	1861210	21179599577	11379.48 ± 3698.64	54.49	49.71
ilLasMege1	ilLasMege1	1670235	21260999227	12729.35 ± 4136.20	55.62	46.8
ilLatStri6	ilLatStri6	2205228	26701803623	12108.41 ± 4648.05	65.39	47.29
ilLepSina1	ilLepSina1	1987107	24674946807	12417.52 ± 4595.90	54.6	38.02
ilLeuSali1	ilLeuSali1	1957452	22726468134	11610.23 ± 3300.62	64.97	32.52
ilLigAdus1	ilLigAdus1	1640079	19191676607	11701.68 ± 4821.05	62.72	50.35
ilLimCami1	ilLimCami1	1892702	25398411895	13419.13 ± 4664.85	49.89	62.85
ilLitOrni1	ilLitOrni1	2363327	29369252454	12427.08 ± 3650.55	64.06	60.27
ilLitSemi2	ilLitSemi2	1880948	22268949002	11839.22 ± 5039.11	58.32	43.33
ilLitSoci1	ilLitSoci1	1989224	28605193044	14380.08 ± 5009.62	59.64	61.21
ilLobHalt1	ilLobHalt1	1871062	22738999329	12152.99 ± 5185.28	54.54	76.24
ilLomBima1	ilLomBima1	1971453	26102459422	13240.21 ± 4617.86	67.33	49.51
ilLupTest1	ilLupTest1	1195667	15314771067	12808.56 ± 5416.11	51.16	26.65
ilLycHirt1	ilLycHirt1	1667880	22065066194	13229.41 ± 5368.24	59.93	41.75
ilLycPhla1	ilLycPhla1	1842326	23111087583	12544.52 ± 3705.19	51.76	57.79
ilLymMona1	ilLymMona1	2899548	34549540575	11915.49 ± 5570.59	50.81	40.51
ilLysBell1	ilLysBell1	2255726	26898948669	11924.74 ± 3657.85	55.53	54.62
ilLysCori1	ilLysCori1	1944851	24612648705	12655.29 ± 3701.49	55.72	48.61
ilMacNota1	ilMacNota1	1713567	22375529039	13057.87 ± 5228.33	48.47	60.4
ilMamBras1	ilMamBras1	1892434	19534923671	10322.64 ± 4011.99	59.04	36.17
ilManJurt1	ilManJurt1	2145668	29034766428	13531.81 ± 4160.85	48.9	76.92
ilManJurt1	ilManJurt4	1920687	26148189596	13613.98 ± 5588.15	61.44	69.28
ilMarLuna1	ilMarLuna1	2267924	27199930083	11993.32 ± 6118.69	54.85	38.35
ilMegAlbu1	ilMegAlbu1	1229595	17038287322	13856.83 ± 4713.04	47.06	44.91
ilMelAtha1	ilMelAtha1	1319858	18104773011	13717.21 ± 5551.13	47.62	31.83
ilMelCinx1	ilMelCinx1	1240622	13840924224	11156.44 ± 5057.62	60.73	29.03
ilMelGala2	ilMelGala1	478178	6653186889	13913.62 ± 4932.46	43.95	11.62
ilMelGala2	ilMelGala2	1816441	16969689396	9342.27 ± 4646.75	72.55	29.63
ilMelPers1	ilMelPers1	2047721	25796771994	12597.80 ± 5383.97	63.67	42.49
ilMesFuru1	ilMesFuru1	3559057	36024607756	10121.95 ± 4831.19	60.16	42.64
ilMicArun2	ilMicArun2	2009798	17415994922	8665.54 ± 5727.93	64.12	18.41
ilMilMini2	ilMilMini1	974988	9016999121	9248.32 ± 5208.04	64.26	9.09
ilMilMini2	ilMilMini2	3866914	34243668661	8855.55 ± 5726.33	64.69	34.52
ilMimTili1	ilMimTili1	3381907	35480059145	10491.14 ± 4423.49	57.42	77.97
ilMonLaev2	ilMonLaev1	2024194	24543816625	12125.23 ± 5253.77	70.03	41.86
ilMonLaev2	ilMonLaev2	1716885	20979977593	12219.79 ± 4022.87	69.43	35.78
ilMusNiti1	ilMusNiti1	2276268	23939865548	10517.16 ± 3967.54	67.3	46.5
ilMytAlbi1	ilMytAlbi1	2125297	25120661578	11819.84 ± 5386.65	57.04	38
ilMytFerr1	ilMytFerr1	1784968	24936762252	13970.43 ± 5341.09	46.13	31.59
ilMytImpu1	ilMytImpu1	2653179	35788767210	13489.01 ± 4662.56	49.88	41.06
ilNemSwae1	ilNemSwae1	1767241	24151502413	13666.22 ± 5306.11	61.25	36.01
ilNocFimb1	ilNocFimb1	832375	11305779401	13582.56 ± 6348.31	45.86	21.32
ilNocJant1	ilNocJant1	1845365	25536082259	13837.96 ± 5027.03	45.15	50.25
ilNocPron1	ilNocPron1	2145076	23692820839	11045.21 ± 3087.29	62.99	48.96
ilNotDrom1	ilNotDrom1	2150577	25963917535	12073.00 ± 4039.22	58.26	79.77
ilNotUddm1	ilNotUddm1	963902	14078939431	14606.19 ± 4920.56	53.35	19.62
ilNotZicz1	ilNotZicz1	960894	13388966842	13933.86 ± 4345.70	52.04	39.81
ilNycReva1	ilNycReva1	1602087	19906952677	12425.64 ± 5277.51	69.25	33.94
ilNymNiti1	ilNymNiti1	2635510	23994808785	9104.43 ± 5170.11	67.19	41.85
ilNymPoly1	ilNymPoly1	1310560	14275552798	10892.71 ± 3397.75	60.61	38.15
ilOchPlec1	ilOchPlec1	1745429	21929196349	12563.79 ± 4435.61	51.14	37.11
ilOchSylv3	ilOchSylv3	883294	8231811194	9319.45 ± 4929.35	61.52	23.98
ilOliLatr1	ilOliLatr1	2099865	26230814243	12491.67 ± 5399.96	56.8	48.93
ilOmpLuno1	ilOmpLuno1	1483062	19206686082	12950.70 ± 4857.77	55.03	30.66
ilOpeBrum1	ilOpeBrum1	1669078	18931379323	11342.42 ± 4736.96	55.27	35.55
ilOpiLute1	ilOpiLute1	1752251	23754903104	13556.79 ± 3729.03	52.46	68.29
ilOrgAnti1	ilOrgAnti2	4017531	38276217170	9527.30 ± 5600.26	62.21	86.7
ilOrgAnti1	ilOrgAnti1	2996213	24927948479	8319.82 ± 4451.92	62.11	56.46
ilOrtGrac1	ilOrtGrac1	1840698	24754848452	13448.62 ± 4913.60	65.64	37.78
ilOrtInce1	ilOrtInce1	2197326	23675930925	10774.88 ± 4374.26	67.62	27.25
ilPamAuri1	ilPamAuri1	2018067	24042552841	11913.65 ± 5178.70	66.99	24.86
ilPamFasc1	ilPamFasc1	1335953	19675151914	14727.43 ± 4692.05	44.44	38.03
ilPanCinn1	ilPanCinn1	1022841	13735615563	13428.89 ± 4134.35	55.24	35.2
ilPapMach1	ilPapMach1	1697408	23247590330	13695.94 ± 4453.01	48.17	100.92
ilParAegt1	ilParAegt1	1979789	20663047809	10436.99 ± 3859.13	70.68	43
ilParStra1	ilParStra1	909741	12765104272	14031.58 ± 5476.31	47.53	27.99
ilPerRhom1	ilPerRhom1	1984731	21437985914	10801.46 ± 5228.42	62.57	45.17
ilPhaBuce1	ilPhaBuce1	2524487	29383158075	11639.26 ± 4997.01	51.36	35.09
ilPheGnom1	ilPheGnom1	2430986	16458454698	6770.28 ± 2924.94	63.68	63.3
ilPheTrem1	ilPheTrem1	4194858	47829205062	11401.87 ± 4723.34	51.61	171.9
ilPhiVetu1	ilPhiVetu1	1778326	22037506938	12392.28 ± 5232.64	46.92	29.67
ilPhlMeti2	ilPhlMeti2	1977047	22660609785	11461.85 ± 3904.77	59.32	46.98
ilPhrFuli1	ilPhrFuli1	1767634	19981472059	11304.08 ± 5197.52	53.43	36.47
ilPieBrab1	ilPieBrab1	1762551	24280851451	13775.97 ± 3902.03	49.95	94.55
ilPieNapi4	ilPieNapi4	1855815	28840803860	15540.78 ± 4974.01	47.01	94.52
ilPieNapi4	ilPieNapi1	1541113	18744691457	12163.09 ± 4090.59	52.14	61.44
ilPieRapa1	ilPieRapa1	1038332	13826150443	13315.73 ± 4062.34	45.96	57.43
ilPleArgu1	ilPleArgu1	691491	8622038853	12468.77 ± 4315.61	50.05	23.92
ilPluXylo3	ilPluXylo3	1819696	24899672067	13683.42 ± 3600.01	48.77	81.09
ilPolIcar1	ilPolIcar1	1330507	17244758569	12961.04 ± 4959.44	45.02	36.56
ilPolLich1	ilPolLich1	2418544	27298777775	11287.28 ± 2941.73	67.54	41.54
ilProPyga1	ilProPyga1	3065501	34076263040	11116.05 ± 3056.13	68.47	85.22
ilPtiCapc1	ilPtiCapc1	1450556	19177860016	13221.04 ± 5147.10	48.63	57.58
ilPyrFari1	ilPyrFari1	1964712	22165451107	11281.78 ± 4772.74	69.6	23.89
ilPyrMalv3	ilPyrMalv3	5017722	49372075375	9839.54 ± 3154.62	64.64	71.37
ilSatPavo1	ilSatPavo1	2284469	24566672558	10753.78 ± 5325.02	65.27	52.6
ilSchCost1	ilSchCost1	1632586	21865993303	13393.47 ± 4873.46	53.84	40.19
ilSelDent1	ilSelDent1	2036155	26219180783	12876.81 ± 5609.65	52.65	26.66
ilSesApif2	ilSesApif2	1102162	14527689979	13181.08 ± 5764.75	41.49	28.01
ilSesBemb1	ilSesBemb1	1091909	12676373245	11609.37 ± 5003.81	62.37	27.96
ilShaVerb5	ilShaVerb5	1296880	16339672027	12599.22 ± 5099.06	67.03	42.45
ilShaVerb5	ilShaVerb1	424427	4064556320	9576.57 ± 4134.62	68.04	10.56
ilSphPina1	ilSphPina1	1922591	23513551682	12230.14 ± 4803.63	45.24	48.85
ilSpiLubr1	ilSpiLubr1	2406274	22591810106	9388.71 ± 3966.84	58.67	40.98
ilSpiLutu1	ilSpiLutu1	1306299	16369921005	12531.53 ± 5774.47	54.19	29.61
ilSteBipu1	ilSteBipu1	1763306	18267879270	10360.02 ± 4621.41	75.67	24.68
ilSynAndr1	ilSynAndr1	3136780	33127255626	10560.91 ± 3175.65	65.94	99.99
ilSynForm1	ilSynForm1	2026893	24103671007	11891.93 ± 5060.65	68.92	78.81
ilSynMyop1	ilSynMyop1	1796098	20654364728	11499.58 ± 5347.41	69.89	73.26
ilSynTipu2	ilSynTipu2	1532765	19140635840	12487.65 ± 5046.04	68.4	67.7
ilSynVesp1	ilSynVesp1	2099194	26941371115	12834.15 ± 5066.88	48.98	98.01
ilTelLucu1	ilTelLucu1	1617172	13372083028	8268.81 ± 1600.46	75.49	33.25
ilThaMatu1	ilThaMatu1	2364108	25626832292	10839.96 ± 2890.07	73.33	52.72
ilTheBrit1	ilTheBrit1	1865617	19646607342	10530.89 ± 3142.40	73.65	54.69
ilTheObel3	ilTheObel3	1742626	22069704361	12664.62 ± 4718.24	59.54	60.04
ilThoDeci1	ilThoDeci1	3150632	29592799105	9392.65 ± 6133.60	68.69	23.43
ilThuSene1	ilThuSene1	3086928	37475603946	12140.10 ± 4873.65	55.43	50.14
ilThyBati1	ilThyBati1	783451	9065116635	11570.75 ± 4799.51	63.75	30.35
ilThySylv1	ilThySylv1	1708609	17170777441	10049.57 ± 4785.14	63.73	39.63
ilTilAura1	ilTilAura1	2097679	23413635633	11161.69 ± 4986.30	64.39	30.77
ilTinPell1	ilTinPell1	1668672	15088341187	9042.13 ± 1797.32	75.72	65.16
ilTinSemi1	ilTinSemi1	1877717	26513083503	14119.85 ± 4241.12	48.1	47.29
ilTinTrin1	ilTinTrin1	893068	11794806217	13207.06 ± 6017.93	47.43	33.64
ilTorAlte1	ilTorAlte1	2107273	24719511384	11730.57 ± 4045.86	69.2	60.42
ilTriEmor1	ilTriEmor1	1361913	15093249863	11082.39 ± 4846.14	64.28	28.47
ilTyrJaco4	ilTyrJaco4	1476323	18008978628	12198.54 ± 5622.47	68.88	32.08
ilUdeOliv2	ilUdeOliv2	2155355	21852518750	10138.71 ± 5189.11	67.07	37.67
ilVanAtal1	ilVanAtal1	1156631	12302449246	10636.45 ± 3574.35	72.05	35.95
ilVanCard2	ilVanCard2	783914	10252126198	13078.13 ± 5657.60	45.26	26.04
ilWatBina1	ilWatBina1	1822687	22335873223	12254.37 ± 4554.81	48.52	72.6
ilXanIcte2	ilXanIcte2	2348796	30769307967	13100.03 ± 5438.45	61.94	48.35
ilXanSpad1	ilXanSpad1	1249998	16834321027	13467.48 ± 5934.34	65.74	64.21
ilXesCnig1	ilXesCnig1	1859245	26178662658	14080.27 ± 5073.13	51.98	36.55
ilXesSexs1	ilXesSexs1	1553538	18178399170	11701.29 ± 3939.96	69.5	30.42
ilXesXant1	ilXesXant1	2152044	25046504197	11638.47 ± 3687.77	53.99	28.34
ilXylAreo1	ilXylAreo1	3566828	31997929122	8970.98 ± 5358.26	68.89	59.55
ilYpoCagn1	ilYpoCagn1	1964663	21270528639	10826.55 ± 5057.93	68.09	40.63
ilYpoCagn1	ilYpoCagn5	1956530	17025272718	8701.77 ± 1679.24	78.66	32.52
ilYpoPade2	ilYpoPade1	2622754	22666626736	8642.30 ± 2074.44	79.04	42.57
ilYpoPade2	ilYpoPade2	1508966	15032803194	9962.32 ± 5114.31	63.58	28.23
ilYpoPlub1	ilYpoPlub1	1347145	19399940616	14400.78 ± 5100.79	42.12	31.9
ilYpoRore1	ilYpoRore1	1495037	13543219851	9058.79 ± 4654.21	63	26.11
ilYpoSedl1	ilYpoSedl1	1472292	20804670591	14130.80 ± 6395.05	36.29	33.1
ilYpsScab1	ilYpsScab1	1695432	21473869326	12665.72 ± 4676.32	51.42	26.81
ilYpsSequ2	ilYpsSequ1	777488	8909664507	11459.55 ± 5311.93	50.75	11.31
ilYpsSequ2	ilYpsSequ2	1444683	22691258450	15706.74 ± 4684.60	42.26	28.8
ilZeuPyri1	ilZeuPyri1	1925712	26352399775	13684.50 ± 5715.70	44.09	40.01
ilZygFili1	ilZygFili1	1997071	20378165566	10204.03 ± 3764.67	59.7	59.97
inChrCarn1	inChrCarn1	1854906	20723616681	11172.33 ± 4060.03	62.36	42.38
ioIscEleg1	ioIscEleg1	3785755	42816403341	11309.87 ± 4420.49	57.12	27.82
ioPlaPenn1	ioPlaPenn1	5054741	48310815496	9557.53 ± 5177.65	70.04	30.23
ioSymStri1	ioSymStri1	1853685	22843283084	12323.17 ± 4390.10	57.29	19.94
ipIsoGram3	ipIsoGram3	2591999	22504594831	8682.33 ± 2971.01	64.69	30.41
ipLeuNigr2	ipLeuNigr2	1859039	14375656737	7732.84 ± 2620.17	71.13	30.16
ipNemDubi1	ipNemDubi1	3147596	28489973125	9051.34 ± 3985.22	71.06	120.51
ipNemPict2	ipNemPict2	8256153	67570599033	8184.27 ± 3486.02	72.69	303.37
ipProMont4	ipProMont4	1520070	18256454678	12010.27 ± 4379.04	61.17	83.76
iyAmbArma2	iyAmbArma1	462765	3923639333	8478.69 ± 3609.15	70.2	19.06
iyAncNigr1	iyAncNigr1	1252132	16228364866	12960.59 ± 5787.35	52.98	69.95
iyAndBuce1	iyAndBuce1	1868738	19249068523	10300.57 ± 4064.85	65.26	50.72
iyAndDors1	iyAndDors1	972357	11228221233	11547.43 ± 4104.69	52.83	41.72
iyAndFulv1	iyAndFulv1	1467983	17957122288	12232.51 ± 4667.80	60.23	48.47
iyAndHaem1	iyAndHaem1	2164701	22812026923	10538.19 ± 4414.31	57.34	78.32
iyAndHatt1	iyAndHatt1	1502497	21590256143	14369.58 ± 5034.76	44.04	51.15
iyAndMinu1	iyAndMinu1	1841974	13766487657	7473.77 ± 3767.38	62.82	39.34
iyAnoNige1	iyAnoNige1	591872	7797244034	13173.87 ± 4427.73	47.11	28.15
iyAthRosa1	iyAthRosa1	1182340	16633064602	14067.92 ± 4495.50	42.63	97.31
iyAthRosa1	iyAthRosa2	916719	6116478366	6672.14 ± 8817.81	17.93	35.78
iyBomHort1	iyBomHort1	1696936	22116135010	13032.98 ± 3595.48	54.43	83.98
iyBomPasc1	iyBomPasc1	667566	7909056631	11847.60 ± 3491.08	63.96	29.28
iyBomPrat1	iyBomPrat1	2032059	18466440409	9087.55 ± 3001.38	62.32	67.32
iyBomTerr1	iyBomTerr1	1585645	18033202216	11372.79 ± 3601.26	60	62.02
iyBuaLabo1	iyBuaLabo1	851755	11230565087	13185.21 ± 5181.99	46.58	49.81
iyCamRapt1	iyCamRapt1	1603320	18838679850	11749.79 ± 4583.82	69	86.64
iyCerRyby1	iyCerRyby1	1916666	21908194290	11430.37 ± 3973.19	60.38	58.34
iyCliInci1	iyCliInci1	1602181	18392191252	11479.47 ± 4571.96	60.52	70.76
iyCoeConi1	iyCoeConi1	1210552	14081087712	11631.96 ± 4002.86	62.43	41
iyDolMedi1	iyDolMedi1	1283862	15273984508	11896.91 ± 5093.87	52.45	70.58
iyEctCont1	iyEctCont1	1912331	20563084517	10752.89 ± 2870.12	62.34	87.32
iyEctLitu1	iyEctLitu1	2140431	22292721679	10415.06 ± 2813.30	64.66	103.13
iyIchXant1	iyIchXant1	1210516	13486048394	11140.74 ± 4356.96	56.74	54.79
iyLasLatv2	iyLasLatv2	967105	12511107309	12936.66 ± 5155.64	44.89	35.6
iyLasMori1	iyLasMori1	831011	11010980708	13250.10 ± 5930.92	46.78	36.06
iyLasPaux1	iyLasPaux1	1772086	25661572316	14481.00 ± 3719.57	51.59	59.66
iyMegLign1	iyMegLign1	1417282	18616981512	13135.69 ± 3961.11	51.1	82.98
iyMegWill1	iyMegWill1	1956739	21271274948	10870.78 ± 3098.29	59.2	76.41
iyMimDahl1	iyMimDahl1	940133	13544703418	14407.22 ± 6031.62	54.39	52.35
iyNetDila1	iyNetDila1	1373597	16086206644	11711.01 ± 4532.18	65	55.08
iyNomFabr1	iyNomFabr1	2346954	21767219283	9274.67 ± 2950.61	58.9	99.67
iyNomFuca1	iyNomFuca1	2321535	31531480013	13582.17 ± 5206.57	60.65	121.6
iyNysSpin1	iyNysSpin1	1245747	12913486019	10366.06 ± 3478.16	64.02	55.86
iyOphLute1	iyOphLute1	2058531	21898576346	10637.96 ± 4683.39	59.27	34.24
iyPemLugu1	iyPemLugu1	1897354	16694919761	8799.05 ± 4873.89	62.38	53.19
iyRhoChlo1	iyRhoChlo1	1737442	18626934089	10720.90 ± 4241.79	69.62	72.97
iyStePhae1	iyStePhae1	1751390	18855600208	10766.08 ± 4892.42	72.05	76.99
iyTenMeso1	iyTenMeso1	2037244	21988039078	10793.03 ± 5406.67	67.18	56.85
iyTenNoth1	iyTenNoth1	1421226	18535920027	13042.20 ± 6725.55	49.3	73.38
iyTipFemo1	iyTipFemo1	1829936	22299931464	12186.18 ± 3263.85	53.62	81.78
iyVesCrab1	iyVesCrab1	1424448	15789557967	11084.69 ± 3481.99	57.25	72.45
iyVesGerm1	iyVesGerm1	1264142	14583147436	11536.00 ± 3488.50	64.81	71.91
iyVesVulg1	iyVesVulg5	2290813	24773732910	10814.38 ± 4272.24	65.34	132.36
iyVesVulg1	iyVesVulg1	1869599	16582697928	8869.65 ± 3384.94	65.42	88.6
iyVesVulg1	iyVesVulg2	1800946	16432055817	9124.12 ± 3302.34	75.66	87.79
iyVesVulg1	iyVesVulg3	616953	5509455879	8930.11 ± 3820.76	78.54	29.43
jaDiaLine6	jaDiaLine6	2973224	20166560020	6782.72 ± 4721.62	75.03	67.26
jaMetSeni4	jaMetSeni4	2769750	21492083284	7759.58 ± 2774.62	79.17	56.19
jaNemVect1	jaNemVect1	1698136	14547151339	8566.54 ± 3783.29	64.05	54.16
jhCanCock6	jhCanCock6	2016639	19827576250	9831.99 ± 3159.51	63.86	85.17
jrHalOcto1	jrHalOcto1	4530798	39662507509	8753.98 ± 3968.71	61.21	154.09
kaAplTurb1	kaAplTurb1	3745220	38861606024	10376.32 ± 4508.43	65.12	64.19
kaAscMent1	kaAscMent1	2125849	14574712833	6855.95 ± 4115.18	67.89	75.83
kaClaLepa1	kaClaLepa1	1783377	24111182566	13519.96 ± 5239.86	58.02	116.36
kcLamFluv1	kcLamFluv1	3202007	33792824058	10553.64 ± 4938.36	57.45	34.58
kmMyxGlut1	kmMyxGlut1	4269857	42805134941	10024.96 ± 4063.45	63.49	16.07
laTriPals1	laTriPals1	1274477	14725605373	11554.23 ± 4898.44	60.21	33.79
lpBroSter1	lpBroSter1	10229574	101219363424	9894.78 ± 5021.08	61.59	37.9
lpCarAren1	lpCarAren1	1924118	24687226598	12830.41 ± 4677.59	62.75	70.19
lpCarDepa1	lpCarDepa1	1447631	24598201544	16992.04 ± 4661.87	50.42	35.15
lpCarDivu1	lpCarDivu1	2211725	19789736626	8947.65 ± 2587.39	76.38	50.99
lpCarPend1	lpCarPend1	1295493	12429050817	9594.07 ± 3622.51	68.59	34.31
lpCarRost1	lpCarRost1	1833458	27434585886	14963.30 ± 4487.74	56.23	72.96
lpCarSylv1	lpCarSylv1	1077131	9255844288	8593.05 ± 2834.84	80.67	25.54
lpJunEffu1	lpJunEffu1	1629286	19848028039	12182.04 ± 3975.49	54.07	83.06
lpLuzSylv1	lpLuzSylv1	1615769	14246510296	8817.17 ± 3773.14	73.31	33.08
lpPhrAust1	lpPhrAust1	2415188	22926974811	9492.83 ± 3098.13	72.28	27.02
lpSchLacu1	lpSchLacu1	977205	15777582819	16145.62 ± 5479.31	46.97	32.88
lpSchTriq1	lpSchTriq1	2284366	22536639098	9865.60 ± 4960.53	69.52	39.33
mApoSyl1	mApoSyl1	4435104	48029884567	10829.48 ± 5337.47	48.86	18.53
mCanLor1	mCanLor1	6838200	77822587803	11380.57 ± 5052.66	47.35	34.04
mCerEla1	mCerEla1	5839374	84784040750	14519.37 ± 4512.28	40.81	32.71
mDelDel1	mDelDel1	10433795	88990184523	8529.03 ± 2659.60	75.07	39.84
mEptNil1	mEptNil1	3920579	43134287053	11002.02 ± 5094.11	59.73	22.79
mGloMel1	mGloMel1	10247961	69226821913	6755.18 ± 2655.08	78.23	31.02
mHypAmp2	mHypAmp2	8239793	69412490466	8424.06 ± 3851.42	74.84	30.27
mLagAlb1	mLagAlb1	9876524	78264516309	7924.30 ± 4549.38	70.95	34.46
mMarMar1	mMarMar1	9871950	85181892517	8628.68 ± 4459.24	19.87	37.14
mMelMel3	mMelMel3	6217444	101829901157	16378.10 ± 4653.19	34.92	41.93
mMicMin1	mMicMin1	1812465	20905352170	11534.21 ± 4532.46	66.82	9.88
mMunRee1	mMunRee1	3184979	40275382436	12645.42 ± 4672.42	61.72	16.82
mMusMuc1	mMusMuc1	8782258	99308074838	11307.81 ± 6031.57	57.59	39.74
mOrcOrc1	mOrcOrc1	8364770	88009389016	10521.44 ± 5506.38	62.78	37.46
mPhoPho1	mPhoPho1	2250035	21971970503	9765.17 ± 4076.04	70.89	9.8
mPipPyg2	mPipPyg2	12236023	123242154798	10072.08 ± 4760.83	33.77	70.95
mPleAur1	mPleAur1	8750730	89666344903	10246.73 ± 5280.54	62.56	44.53
mSteCoe1	mSteCoe1	10361013	84578454529	8163.15 ± 4238.90	73.95	37.14
paTetJugo1	paTetJugo1	237199	3101044471	13073.60 ± 4631.42	56.76	118.74
pxEimPrae1	pxEimPrae1	2202698	32251084475	14641.63 ± 4841.42	57.31	502.07
qcStrAcum1	qcStrAcum1	2300922	21150974135	9192.39 ± 2924.60	73.8	103.46
qhLepNord3	qhLepNord3	2185834	20473440337	9366.42 ± 5033.47	63.26	60.6
qqAmaFero1	qqAmaFero1	6860139	91960620512	13405.07 ± 4250.78	61.17	30.67
qqArgBrue1	qqArgBrue1	3480519	44439937049	12768.19 ± 5905.76	61.45	29.61
qqMetBour1	qqMetBour1	3700669	32053740566	8661.61 ± 5229.02	66.35	27.83
qqMetSegm1	qqMetSegm1	1367464	20063438634	14672.00 ± 6612.51	47.53	14.22
qqOdiSpin1	qqOdiSpin1	1834514	20375160518	11106.57 ± 5024.28	68.91	55.95
qqParLuna2	qqParLuna2	3310615	39253022365	11856.72 ± 4355.78	65.45	33.22
qqTetMont2	qqTetMont2	1681643	17915350620	10653.48 ± 4209.57	66.51	27.02
qxSacCarc1	qxSacCarc1	1607414	17416534295	10835.13 ± 3733.95	61.94	66.31
rZooViv1	rZooViv1	3879414	49144220348	12667.95 ± 5748.66	53.39	35.67
sRajBra1	sRajBra1	6859385	84312832592	12291.60 ± 4976.84	58.68	33
tnLinLong1	tnLinLong1	3715406	24650726626	6634.73 ± 2818.67	76.13	63.14
tzBugNeri2	tzBugNeri2	5496716	49632478290	9029.48 ± 4017.22	74.41	247.86
tzBugStol2	tzBugStol2	1364717	12622912483	9249.47 ± 3225.77	66.88	53.8
tzCryPall5	tzCryPall5	1872135	20183247247	10780.87 ± 3499.68	53.65	36.01
tzMemMemb1	tzMemMemb1	1963927	22490840832	11451.97 ± 4510.78	47.37	66.3
tzWatSuba1	tzWatSuba1	4938240	28640526331	5799.74 ± 2024.92	79.09	38.93
ucDunPrim2	ucDunPrim2	657440	8235725823	12526.96 ± 4570.28	48.66	42.73
ucMarCocc1	ucMarCocc1	1105138	18515821328	16754.31 ± 4891.99	42.12	829.72
ucPycProv1	ucPycProv1	1171026	14264457944	12181.16 ± 3925.15	42.85	442.59
wcApoIcte1	wcApoIcte1	4875204	39344999051	8070.43 ± 3023.77	72.82	35.51
wcLumRube1	wcLumRube1	2343089	22366601082	9545.78 ± 2829.58	61.1	28.83
wcLumTerr1	wcLumTerr1	4044553	34835281060	8612.89 ± 4263.49	70.18	33.43
wdMagJohn1	wdMagJohn1	2212272	19992441155	9037.06 ± 3919.27	66.79	23.29
wkErpOcto2	wkErpOcto2	1800502	22138207565	12295.58 ± 4810.49	58.66	58.06
wpAchSqua1	wpAchSqua1	5220395	54787405492	10494.88 ± 3130.80	68.76	37.05
wpAleGela1	wpAleGela1	4241082	39260002219	9257.07 ± 4555.03	64.31	31.94
wpAliVire1	wpAliVire1	3995834	33399752767	8358.64 ± 3955.84	66.75	49.78
wpHarImpa5	wpHarImpa5	5173689	40322447839	7793.75 ± 4659.14	66.88	27.53
wpSthLimi1	wpSthLimi1	3763186	43352939481	11520.28 ± 3557.01	59.63	71.72
wrPisGeom1	wrPisGeom1	1074191	12689696343	11813.26 ± 3501.68	54.54	77.2
wtTerLapi1	wtTerLapi1	2786652	25229655827	9053.75 ± 3586.76	65.22	33.97
xbArcSenh1	xbArcSenh1	4584346	50643847413	11047.13 ± 4364.58	68.54	53.99
xbAzoCham1	xbAzoCham1	2851208	34710841044	12174.08 ± 5410.63	66.47	20.27
xbCerEdul1	xbCerEdul1	3360520	34057208718	10134.51 ± 5079.10	68.96	41.47
xbGarTell2	xbGarTell2	5529534	54797787494	9910.02 ± 3585.83	65.94	34.35
xbLutLutr1	xbLutLutr1	2041569	25210183379	12348.44 ± 5589.38	63.45	34.73
xbMagGiga1	xbMagGiga1	2625495	26902504611	10246.64 ± 4647.35	67.47	47.77
xbMimVari1	xbMimVari1	2312969	29173915214	12613.19 ± 5433.04	59.22	29.98
xbMytEdul2	xbMytEdul2	3715471	38612230962	10392.28 ± 5933.05	62.71	29.64
xbOstEdul1	xbOstEdul1	7282428	79710367659	10945.58 ± 4506.55	65.43	89.27
xbSpiSoli1	xbSpiSoli1	2019167	11762585761	5825.46 ± 4228.77	74.59	12.63
xbSpiSubt1	xbSpiSubt1	2454555	29182324501	11889.05 ± 4468.17	64.58	31.58
xgAniVort1	xgAniVort1	3143406	35478947555	11286.78 ± 4289.85	55	42.38
xgGibMagu1	xgGibMagu1	4895548	50925136301	10402.34 ± 5245.06	62.02	34.8
xgOncCelt3	xgOncCelt3	13737618	141243678868	10281.53 ± 5177.45	8.46	123.89
xgPatDepr1	xgPatDepr1	2164265	24547373169	11342.13 ± 4044.21	50.83	37.56
xgPatPell1	xgPatPell1	2186546	22470915151	10276.90 ± 5048.29	57.35	31.69
xgPatUlys2	xgPatUlys2	2653928	23402147764	8817.93 ± 4697.26	68.58	33.82
xgPatVulg1	xgPatVulg1	4638515	42743578270	9214.93 ± 3024.59	66.69	61.55
xgPhoLine1	PHORD0020b	6775320	77322433965	11412.37 ± 4031.85	66.94	80.91
xgPhoLine1	PHORD0021b	7193500	77688452085	10799.81 ± 3132.00	71.22	81.29
xgPhoLine1	PHORD0023b	3859352	45581000959	11810.53 ± 4308.35	62.96	47.69
xgPhoLine1	PHORD0024b	4418156	47378321367	10723.55 ± 3673.97	67.78	49.57
xgPhoLine1	PHORD0030b	5763644	53206122113	9231.33 ± 3158.01	73.81	55.67
xgPhoLine1	PHORD0031b	7136872	69586272055	9750.25 ± 2944.21	73.8	72.81
xgPhoLine1	PHORD0034b	3890583	35301165809	9073.49 ± 3174.64	68.97	36.94
xgPhoLine1	PHORD0038b	5652044	38243412023	6766.30 ± 1932.39	80.43	40.02
xgPhoLine1	PHORD0051b	8522165	59112565503	6936.33 ± 2615.46	79.07	61.85
xgPhoLine1	PHORD0058b	4435762	32810777250	7396.88 ± 1993.57	78.41	34.33
xgPhoLine1	PHORD0060b	2276425	17778183651	7809.69 ± 2274.12	75.51	18.6
xgPhoLine1	xgPhoLine1	3121824	31213170734	9998.38 ± 5790.26	58.22	32.66
xgPhoLine1	xgPhoLine2	2753211	22006158939	7992.91 ± 3483.93	63.07	23.03
xgSteCine2	xgSteCine2	4950280	53824332075	10872.99 ± 4266.83	52.74	42.77
xpLepCine2	xpLepCine2	5178697	46172661496	8915.88 ± 3724.24	72.2	65.74

## Sheet: Table 6
Supplementary Table 6. DToL germline mutation statistics
Reference sample	Sample	SNP count	SNP density	Transition count	Transversion count	TiTv ratio	Deletion count	Deletion density	Insertion count	Insertion density	Indel count	Indel density	Indel ratio
bAccGen1	bAccGen1	1144464	0.00100566	744395	400069	1.86	125176	0.000109994	104957	9.2227e-05	230133	0.000202221	0.84
bAnaAcu1	bAnaAcu1	9366563	0.009101	6484349	2882214	2.25	591502	0.000574731	578008	0.00056162	1169510	0.00113635	0.98
bAnsBra1	bAnsBra1	5434538	0.00508162	3758496	1676042	2.24	376784	0.000352315	365412	0.000341682	742196	0.000693997	0.97
bCinCin1	bCinCin1	1036648	0.00102273	645415	391233	1.65	122178	0.000120537	115968	0.000114411	238146	0.000234948	0.95
bClaHye2	bClaHye2	5181965	0.00488222	3596243	1585722	2.27	386024	0.000363695	363493	0.000342467	749517	0.000706162	0.94
bFriCoe1	bFriCoe1	11053988	0.0109889	6937738	4116250	1.69	667610	0.000663682	682149	0.000678135	1349759	0.00134182	1.02
bLarFus1	bLarFus1	3058384	0.00275415	2162512	895872	2.41	178668	0.000160895	174894	0.000157496	353562	0.000318391	0.98
bPhaCar2	bPhaCar2	2098621	0.00184969	1415845	682776	2.07	150243	0.000132422	145938	0.000128627	296181	0.000261049	0.97
bTetUro1	bTetUro1	875169	0.000946206	618876	256293	2.41	86419	9.3434e-05	76462	8.2668e-05	162881	0.000176102	0.88
daAjuCham1	daAjuCham1	34931	3.9355e-05	22205	12726	1.74	16445	1.8528e-05	8479	9.553e-06	24924	2.8081e-05	0.52
daArcMinu1	daArcMinu1	1139477	0.000599054	700888	438589	1.6	79796	4.1951e-05	76771	4.0361e-05	156567	8.2311e-05	0.96
daBalNigr1	daBalNigr1	1219540	0.00102772	814415	405125	2.01	106929	9.011e-05	102957	8.6763e-05	209886	0.000176873	0.96
daGnaUlig1	daGnaUlig1	260	7.42e-07	124	136	0.91	933	2.663e-06	2949	8.418e-06	3882	1.1081e-05	3.16
daLigVulg1	daLigVulg1	3773919	0.00273327	2372469	1401450	1.69	336878	0.000243984	314140	0.000227516	651018	0.000471501	0.93
daLinVulg1	daLinVulg1	5403033	0.00714392	3348267	2054766	1.63	328245	0.000434007	322120	0.000425909	650365	0.000859916	0.98
daMisOron1	daMisOron1	36629	0.000101801	20813	15816	1.32	10245	2.8473e-05	9569	2.6595e-05	19814	5.5068e-05	0.93
daPseLute1	daPseLute1	4299	4.883e-06	2661	1638	1.62	1856	2.108e-06	10048	1.1414e-05	11904	1.3522e-05	5.41
daPulDyse1	daPulDyse1	2138748	0.00257446	1229307	909441	1.35	154070	0.000185458	154130	0.00018553	308200	0.000370987	1
daScuGale1	daScuGale1	48101	0.000146801	31685	16416	1.93	9347	2.8526e-05	9378	2.8621e-05	18725	5.7147e-05	1
daScuMino1	daScuMino1	11782	3.4727e-05	7577	4205	1.8	3698	1.09e-05	2333	6.876e-06	6031	1.7776e-05	0.63
daSolDulc1	daSolDulc1	4775208	0.00507361	3292753	1482455	2.22	190797	0.00020272	193667	0.000205769	384464	0.000408489	1.02
daVerOffi1	daVerOffi1	355462	0.00122985	229999	125463	1.83	23278	8.0539e-05	23127	8.0017e-05	46405	0.000160556	0.99
dcAgrGith1	dcAgrGith1	73430	4.2783e-05	45499	27931	1.63	15931	9.282e-06	11382	6.632e-06	27313	1.5914e-05	0.71
dcCheAlbu1	dcCheAlbu1	40357	2.5411e-05	22118	18239	1.21	27735	1.7463e-05	17335	1.0915e-05	45070	2.8378e-05	0.63
dcPolAvic1	dcPolAvic1	1891311	0.00548568	1107044	784267	1.41	114290	0.000331494	123085	0.000357004	237375	0.000688498	1.08
dcSalRamo1	dcSalRamo1	472	8.93e-07	244	228	1.07	3973	7.519e-06	4987	9.438e-06	8960	1.6957e-05	1.26
dcSpeBocc1	dcSpeBocc1	1064	2.285e-06	618	446	1.39	5858	1.2582e-05	1436	3.084e-06	7294	1.5667e-05	0.25
dcSpeMari1	dcSpeMari1	783	1.591e-06	481	302	1.59	11650	2.3677e-05	3247	6.599e-06	14897	3.0276e-05	0.28
ddAraThal4	ddAraThal4	357	2.61e-06	165	192	0.86	322	2.355e-06	147	1.075e-06	469	3.429e-06	0.46
ddBarVulg1	ddBarVulg1	1191	4.853e-06	690	501	1.38	801	3.264e-06	846	3.447e-06	1647	6.711e-06	1.06
ddEupLath1	ddEupLath1	4035	3.959e-06	2195	1840	1.19	8408	8.25e-06	7267	7.13e-06	15675	1.538e-05	0.86
ddEupPepu3	ddEupPepu3	3688	1.3323e-05	2294	1394	1.65	1293	4.671e-06	1108	4.003e-06	2401	8.674e-06	0.86
ddLepDidy1	ddLepDidy1	183	5.45e-07	98	85	1.15	202	6.01e-07	491	1.462e-06	693	2.063e-06	2.43
ddPopNigr1	ddPopNigr1	2994236	0.00724813	1986120	1008116	1.97	251040	0.000607691	256930	0.000621949	507970	0.00122964	1.02
ddPriVeri1	ddPriVeri1	1033886	0.00237445	645084	388802	1.66	103313	0.000237272	104934	0.000240994	208247	0.000478266	1.02
ddSalCapr1	ddSalCapr1	2400307	0.00656902	1376164	1024143	1.34	232992	0.000637638	241422	0.000660709	474414	0.00129835	1.04
ddVioOdor1	ddVioOdor1	2540	3.64e-06	1667	873	1.91	7281	1.0433e-05	2225	3.188e-06	9506	1.3621e-05	0.31
dhAlnGlut1	dhAlnGlut1	2956088	0.00647239	1956376	999712	1.96	272938	0.000597601	263801	0.000577596	536739	0.0011752	0.97
dmBerVulg1	dmBerVulg1	2084945	0.00162221	1334507	750438	1.78	187743	0.000146075	173708	0.000135155	361451	0.000281231	0.93
drAilAlti1	drAilAlti1	10896294	0.0118711	8362952	2533342	3.3	471098	0.000513242	479484	0.000522378	950582	0.00103562	1.02
drAstGlyc1	drAstGlyc1	8432	1.2431e-05	4795	3637	1.32	4617	6.807e-06	11734	1.7299e-05	16351	2.4106e-05	2.54
drBuxSemp1	drBuxSemp1	4447224	0.00667642	2903481	1543743	1.88	280557	0.000421188	276446	0.000415016	557003	0.000836204	0.99
drChaAngu1	drChaAngu1	4645336	0.00733256	2648940	1996396	1.33	291553	0.00046021	297638	0.000469815	589191	0.000930024	1.02
drCraLaev2	drCraLaev2	5371931	0.0082662	3619514	1752417	2.07	328546	0.000505559	341517	0.000525519	670063	0.00103108	1.04
drEroMari8	drEroMari8	1361	1.787e-06	955	406	2.35	7957	1.0449e-05	2675	3.513e-06	10632	1.3962e-05	0.34
drFilUlma1	drFilUlma1	930363	0.00346325	526606	403757	1.3	126757	0.000471849	129285	0.00048126	256042	0.000953109	1.02
drGeuUrba1	drGeuUrba1	1241040	0.0009515	842311	398729	2.11	80464	6.1691e-05	75944	5.8226e-05	156408	0.000119917	0.94
drHedHeli1	drHedHeli1	4783411	0.00399653	3123102	1660309	1.88	298085	0.00024905	296918	0.000248075	595003	0.000497124	1
drIleAqui2	drIleAqui2	3421303	0.00434558	2230411	1190892	1.87	212158	0.000269473	212362	0.000269733	424520	0.000539206	1
drMalDome10	drMalDome10	4994370	0.00773805	3430953	1563417	2.19	250401	0.00038796	260494	0.000403598	510895	0.000791558	1.04
drMalDome11	drMalDome11	4831974	0.00743051	3300682	1531292	2.16	251822	0.000387247	261988	0.00040288	513810	0.000790127	1.04
drMalDome5	drMalDome5	4698684	0.00727648	3213787	1484897	2.16	243841	0.000377617	254353	0.000393896	498194	0.000771514	1.04
drMalRobu1	drMalRobu1	6437756	0.0104145	4341065	2096691	2.07	331286	0.000535931	339216	0.000548759	670502	0.00108469	1.02
drMalSylv7	drMalSylv7	3391457	0.00530133	2300918	1090539	2.11	185324	0.000289688	190094	0.000297144	375418	0.000586831	1.03
drMedArab1	drMedArab1	6855	1.3411e-05	3315	3540	0.94	2964	5.799e-06	3898	7.626e-06	6862	1.3425e-05	1.32
drMedLupu1	drMedLupu1	11786	2.0673e-05	6959	4827	1.44	2319	4.068e-06	7399	1.2978e-05	9718	1.7046e-05	3.19
drParJuda1	drParJuda1	507616	0.000954393	282170	225446	1.25	56613	0.000106441	56316	0.000105882	112929	0.000212323	0.99
drPotAnse1	drPotAnse1	1520015	0.0072967	915133	604882	1.51	106084	0.000509247	109345	0.000524901	215429	0.00103415	1.03
drPotSter1	drPotSter1	338441	0.000460744	221451	116990	1.89	37585	5.1167e-05	35733	4.8646e-05	73318	9.9813e-05	0.95
drPruPadu1	drPruPadu1	1951051	0.00440922	1144190	806861	1.42	172496	0.000389827	179558	0.000405787	352054	0.000795614	1.04
drPyrComm1	drPyrComm1	5047104	0.0104127	3440573	1606531	2.14	273468	0.000564191	281395	0.000580545	554863	0.00114474	1.03
drTriFrag1	drTriFrag1	1392795	0.00272214	865824	526971	1.64	129819	0.000253724	134603	0.000263074	264422	0.000516798	1.04
drTriSubt1	drTriSubt1	10747	2.2273e-05	4937	5810	0.85	2257	4.678e-06	2196	4.551e-06	4453	9.229e-06	0.97
drUmbRupe1	drUmbRupe1	16875	4.7928e-05	9881	6994	1.41	6160	1.7495e-05	2572	7.305e-06	8732	2.48e-05	0.42
drUrtUren1	drUrtUren1	331046	0.00101492	192155	138891	1.38	30757	9.4295e-05	30099	9.2277e-05	60856	0.000186572	0.98
eaLuiSars1	eaLuiSars1	3569085	0.00766915	1852621	1716464	1.08	390230	0.000838515	405966	0.000872328	796196	0.00171084	1.04
eaMarGlac1	eaMarGlac1	6162305	0.0119406	3442170	2720135	1.27	561257	0.00108754	573945	0.00111212	1135202	0.00219966	1.02
ecAntBifi1	ecAntBifi1	1735502	0.00551487	901685	833817	1.08	241505	0.000767425	261987	0.000832511	503492	0.00159994	1.08
fAbrBra2	fAbrBra2	2541194	0.00231331	1288564	1252630	1.03	395718	0.000360231	406864	0.000370378	802582	0.000730609	1.03
fAciRut3	fAciRut3	5713579	0.00315252	3203628	2509951	1.28	734054	0.000405021	736030	0.000406112	1470084	0.000811133	1
fBarBab1	fBarBab1	4587562	0.00290206	2244808	2342754	0.96	656690	0.000415417	655650	0.000414759	1312340	0.000830177	1
fBarBar1	fBarBar1	2869831	0.0046596	1316311	1553520	0.85	251310	0.000408039	262017	0.000425424	513327	0.000833463	1.04
fBleOce1	fBleOce1	2636476	0.00389467	1419773	1216703	1.17	327827	0.000484275	302699	0.000447155	630526	0.00093143	0.92
fCarCar2	fCarCar2	197312	0.000119043	96335	100977	0.95	62518	3.7719e-05	66227	3.9956e-05	128745	7.7675e-05	1.06
fCheLab1	fCheLab1	3453348	0.00498171	2035630	1417718	1.44	317764	0.000458398	324485	0.000468094	642249	0.000926492	1.02
fConCon1	fConCon1	5273217	0.00475486	2954415	2318802	1.27	635342	0.000572888	662017	0.000596941	1297359	0.00116983	1.04
fCycLum2	fCycLum2	718851	0.00123874	378786	340065	1.11	175540	0.000302494	170551	0.000293897	346091	0.000596391	0.97
fDanRer4	fDanRer4	4624855	0.0032765	2409881	2214974	1.09	433995	0.000307466	473764	0.000335641	907759	0.000643107	1.09
fEchVip8	fEchVip8	7361191	0.0101002	3729982	3631209	1.03	573637	0.000787078	596205	0.000818043	1169842	0.00160512	1.04
fEutGur1	fEutGur1	4204722	0.00641387	2176113	2028609	1.07	538794	0.000821875	540974	0.0008252	1079768	0.00164708	1
fGobGob1	fGobGob1	4790264	0.00331861	2264974	2525290	0.9	566962	0.000392782	578157	0.000400537	1145119	0.000793319	1.02
fGobNig1	fGobNig1	7195206	0.00842609	3839348	3355858	1.14	687338	0.000804921	724531	0.000848476	1411869	0.0016534	1.05
fHypImm3	fHypImm3	1104112	0.00151754	556923	547189	1.02	230902	0.000317361	223696	0.000307457	454598	0.000624819	0.97
fLabBer1	fLabBer1	2478789	0.00346468	1405974	1072815	1.31	321323	0.000449124	310398	0.000433853	631721	0.000882977	0.97
fLabMix1	fLabMix1	1726713	0.00247432	956591	770122	1.24	277377	0.000397471	276461	0.000396158	553838	0.000793629	1
fLipPho2	fLipPho2	1563831	0.00217671	822746	741085	1.11	241186	0.000335709	218564	0.000304221	459750	0.00063993	0.91
fMicPou1	fMicPou1	1301300	0.00281885	724600	576700	1.26	285541	0.000618532	267427	0.000579294	552968	0.00119783	0.94
fMicVar1	fMicVar1	5296431	0.00764696	2661863	2634568	1.01	651244	0.000940263	673140	0.000971876	1324384	0.00191214	1.03
fPhoGun1	fPhoGun1	1393017	0.00237752	746557	646460	1.15	201823	0.00034446	185866	0.000317225	387689	0.000661685	0.92
fPhoPho1	fPhoPho1	6072336	0.00642425	2794388	3277948	0.85	806855	0.000853615	838821	0.000887433	1645676	0.00174105	1.04
fPlaFle2	fPlaFle2	3219857	0.00543932	1509779	1710078	0.88	301331	0.00050904	298920	0.000504967	600251	0.00101401	0.99
fPlePla1	fPlePla1	4438204	0.00708508	2141465	2296739	0.93	394797	0.000630248	381321	0.000608735	776118	0.00123898	0.97
fPolPol2	fPolPol2	1238916	0.00213276	629359	609557	1.03	244319	0.000420588	218378	0.000375932	462697	0.00079652	0.89
fPunPun2	fPunPun2	1191572	0.00255958	612666	578906	1.06	194715	0.000418262	176824	0.000379831	371539	0.000798093	0.91
fRutRut2	fRutRut2	4521323	0.00412785	2174774	2346549	0.93	654454	0.000597499	674383	0.000615694	1328837	0.00121319	1.03
fScoMax1	fScoMax1	1228837	0.00223951	616917	611920	1.01	196716	0.000358508	184483	0.000336214	381199	0.000694722	0.94
fScoSco1	fScoSco1	3853193	0.00526255	1892885	1960308	0.97	463600	0.000633168	463837	0.000633492	927437	0.00126666	1
fSprSpr1	fSprSpr1	4366452	0.00531145	2121140	2245312	0.94	685332	0.000833653	693555	0.000843655	1378887	0.00167731	1.01
fSquCep2	fSquCep2	3130870	0.00287443	1544524	1586346	0.97	455452	0.000418148	458102	0.000420581	913554	0.000838729	1.01
fSymMel2	fSymMel2	1682641	0.00268841	886781	795860	1.11	271598	0.000433941	265127	0.000423602	536725	0.000857544	0.98
fSynAcu2	fSynAcu2	297922	0.000898812	155786	142136	1.1	52326	0.000157864	47906	0.000144529	100232	0.000302394	0.92
fTauBub2	fTauBub2	1875904	0.00305057	1087131	788773	1.38	253726	0.000412606	252642	0.000410843	506368	0.000823449	1
fTelBon1	fTelBon1	1545474	0.0015741	853574	691900	1.23	240377	0.000244829	236339	0.000240717	476716	0.000485546	0.98
fThuMac1	fThuMac1	5010251	0.00644244	3093981	1916270	1.61	480356	0.000617667	483440	0.000621632	963796	0.0012393	1.01
fTraTra1	fTraTra1	6282361	0.00794508	3461735	2820626	1.23	968300	0.00122457	989960	0.00125197	1958260	0.00247654	1.02
fZeuFab8	fZeuFab8	1806436	0.00231213	902243	904193	1	323903	0.000414576	308609	0.000395	632512	0.000809576	0.95
gfAgaBisp1	gfAgaBisp1	322106	0.0106231	231603	90503	2.56	14831	0.000489126	15489	0.000510827	30320	0.000999953	1.04
gfClaFumo1	gfClaFumo1	206982	0.00428697	162539	44443	3.66	11890	0.000246263	12320	0.000255169	24210	0.000501433	1.04
gfFlaVelt1	gfFlaVelt1	928	2.491e-05	729	199	3.66	116	3.114e-06	67	1.798e-06	183	4.912e-06	0.58
gfLaeSulp1	gfLaeSulp1	317350	0.00848298	235011	82339	2.85	10245	0.000273856	10889	0.00029107	21134	0.000564926	1.06
gfPleOstr1	gfPleOstr1	158387	0.00391788	114096	44291	2.58	8952	0.000221438	9291	0.000229823	18243	0.000451261	1.04
gfPorCaly1	gfPorCaly1	102782	0.00310242	86833	15949	5.44	2877	8.6841e-05	2865	8.6478e-05	5742	0.000173319	1
glLicPygm2	glLicPygm2	16	4.94e-07	11	5	2.2	1094	3.3743e-05	745	2.2979e-05	1839	5.6722e-05	0.68
grCorFumo1	grCorFumo1	32	9.32e-07	29	3	9.67	513	1.4946e-05	65	1.894e-06	578	1.6839e-05	0.13
grSimLame1	grSimLame1	3	1.05e-07	1	2	0.5	10	3.48e-07	0	0	10	3.48e-07	0
grTriPseu1	grTriPseu1	7	2.13e-07	1	6	0.17	229	6.954e-06	49	1.488e-06	278	8.442e-06	0.21
gsMetZobe1	gsMetZobe1	39628	0.00291334	25351	14277	1.78	2156	0.000158503	2239	0.000164605	4395	0.000323108	1.04
gzEntParv1	gzEntParv1	15	3.9e-07	12	3	4	320	8.315e-06	111	2.884e-06	431	1.1199e-05	0.35
gzMucPiri1	gzMucPiri1	939	2.6961e-05	623	316	1.97	221	6.345e-06	238	6.834e-06	459	1.3179e-05	1.08
iHemFuc1	iHemFuc2	7416086	0.0177041	3587353	3828733	0.94	716281	0.00170995	738733	0.00176355	1455014	0.00347349	1.03
icAdaBipu1	icAdaBipu15	4702975	0.011179	2575793	2127182	1.21	382984	0.000910358	401498	0.000954366	784482	0.00186472	1.05
icAdaBipu1	icAdaBipu20	4432353	0.0105358	2439616	1992737	1.22	363457	0.000863942	369346	0.00087794	732803	0.00174188	1.02
icAdaBipu1	icAdaBipu28	4925801	0.0117087	2697110	2228691	1.21	401782	0.000955041	414407	0.00098505	816189	0.00194009	1.03
icAdaBipu1	icAdaBipu29	4631677	0.0110096	2532443	2099234	1.21	378654	0.000900065	392928	0.000933995	771582	0.00183406	1.04
icAdaBipu1	icAdaBipu31	4833118	0.0114884	2647736	2185382	1.21	395832	0.000940897	410693	0.000976222	806525	0.00191712	1.04
icAdaBipu1	icAdaBipu32	4536975	0.0107844	2485638	2051337	1.21	365815	0.000869547	376971	0.000896065	742786	0.00176561	1.03
icAdaBipu1	icAdaBipu33	4631007	0.011008	2533439	2097568	1.21	376605	0.000895195	390427	0.00092805	767032	0.00182324	1.04
icAdaBipu1	icAdaBipu34	4596864	0.0109268	2517244	2079620	1.21	374619	0.000890474	389587	0.000926053	764206	0.00181653	1.04
icAdaBipu1	icAdaBipu36	4772705	0.0113448	2611621	2161084	1.21	391012	0.00092944	402274	0.00095621	793286	0.00188565	1.03
icAdaBipu1	icAdaBipu6	4307532	0.0102391	2356257	1951275	1.21	349346	0.0008304	355127	0.000844141	704473	0.00167454	1.02
icAdaBipu1	icAdaBipu9	4585366	0.0108995	2510982	2074384	1.21	373182	0.000887058	387562	0.00092124	760744	0.0018083	1.04
icAdaBipu1	icAdaBipu1	2269984	0.00539578	1244501	1025483	1.21	186564	0.000443465	203179	0.000482959	389743	0.000926424	1.09
icAgoFuli1	icAgoFuli1	2501991	0.00406019	1219385	1282606	0.95	292187	0.000474156	312956	0.000507859	605143	0.000982015	1.07
icAgrCyan1	icAgrCyan1	1207510	0.00477197	651261	556249	1.17	120543	0.000476375	128112	0.000506287	248655	0.000982662	1.06
icAgrMuri1	icAgrMuri1	5512229	0.00385348	2954519	2557710	1.16	487944	0.000341111	517882	0.00036204	1005826	0.00070315	1.06
icAnaMacu3	icAnaMacu3	1893056	0.00272017	1255119	637937	1.97	145512	0.000209089	154113	0.000221448	299625	0.000430537	1.06
icApoCory1	icApoCory1	1924114	0.0047495	908292	1015822	0.89	184650	0.000455792	199895	0.000493423	384545	0.000949215	1.08
icCanRust1	icCanRust3	3407416	0.00816536	2085224	1322192	1.58	231953	0.00055584	237381	0.000568848	469334	0.00112469	1.02
icCanRust1	icCanRust1	1957588	0.00469106	1233501	724087	1.7	139810	0.000335033	149547	0.000358367	289357	0.0006934	1.07
icCetAura1	icCetAura1	2985710	0.00658449	1658525	1327185	1.25	270780	0.000597161	287993	0.000635121	558773	0.00123228	1.06
icChrOric1	icChrOric1	230540	0.000171588	103722	126818	0.82	38775	2.886e-05	44624	3.3213e-05	83399	6.2073e-05	1.15
icCocSept1	icCocSept1	3471256	0.00927668	1922017	1549239	1.24	212776	0.000568628	234979	0.000627964	447755	0.00119659	1.1
icCryMora2	icCryMora2	1219949	0.00271575	664287	555662	1.2	91789	0.000204333	98926	0.000220221	190715	0.000424555	1.08
icElmAene2	icElmAene2	3425526	0.0074411	1769950	1655576	1.07	340510	0.000739672	355842	0.000772977	696352	0.00151265	1.05
icHalSede1	icHalSede1	5305799	0.00608898	2431191	2874608	0.85	364097	0.000417841	395017	0.000453325	759114	0.000871166	1.08
icHarAxyr1	icHarAxyr1	3130572	0.00809606	1733086	1397486	1.24	191950	0.000496407	202816	0.000524508	394766	0.00102092	1.06
icLagHirt1	icLagHirt1	2850913	0.00930315	1624591	1226322	1.32	211961	0.000691675	230241	0.000751327	442202	0.001443	1.09
icLeiSpin1	icLeiSpin1	1019261	0.00485961	484701	534560	0.91	101740	0.000485074	109359	0.000521399	211099	0.00100647	1.07
icLepMacu1	icLepMacu1	5986018	0.00314163	3653340	2332678	1.57	632887	0.000332157	650199	0.000341243	1283086	0.000673399	1.03
icLocCapr1	icLocCapr1	5077315	0.00950486	2727428	2349887	1.16	423252	0.000792338	456176	0.000853973	879428	0.00164631	1.08
icLocCrat2	icLocCrat2	1459210	0.002027	753035	706175	1.07	122935	0.00017077	130853	0.000181769	253788	0.000352538	1.06
icMalBipu1	icMalBipu1	3049098	0.00608316	1660787	1388311	1.2	432085	0.00086204	456754	0.000911256	888839	0.0017733	1.06
icMelMelo1	icMelMelo1	11410500	0.00713667	6035922	5374578	1.12	874729	0.000547097	931484	0.000582595	1806213	0.00112969	1.06
icNebBrev1	icNebBrev1	831926	0.0043958	404493	427433	0.95	73876	0.000390352	74244	0.000392297	148120	0.000782649	1
icNebSali1	icNebSali1	841603	0.00435479	432448	409155	1.06	91104	0.000471409	91028	0.000471015	182132	0.000942424	1
icOcyOlen1	icOcyOlen1	2824791	0.0027858	1488308	1336483	1.11	238103	0.000234817	254530	0.000251017	492633	0.000485834	1.07
icOphArdo1	icOphArdo1	4546815	0.00528364	2474756	2072059	1.19	419848	0.000487885	436606	0.000507359	856454	0.000995244	1.04
icPhiCogn1	icPhiCogn1	7513739	0.00898054	3832150	3681589	1.04	521827	0.000623696	562041	0.00067176	1083868	0.00129546	1.08
icPodAlpi1	icPodAlpi1	1228691	0.00189498	637603	591088	1.08	161224	0.000248652	163578	0.000252283	324802	0.000500935	1.01
icPolCerv1	icPolCerv1	3296441	0.00482157	1803599	1492842	1.21	313018	0.000457839	322720	0.00047203	635738	0.000929869	1.03
icPteMadi1	icPteMadi3	5420768	0.00810608	2849823	2570945	1.11	358414	0.000535963	370767	0.000554435	729181	0.0010904	1.03
icPteMadi1	icPteMadi1	2194712	0.00328191	1158204	1036508	1.12	149755	0.00022394	153672	0.000229797	303427	0.000453737	1.03
icPyrSerr1	icPyrSerr1	1147532	0.00496685	701515	446017	1.57	54105	0.000234182	57507	0.000248907	111612	0.000483089	1.06
icRhaFulv1	icRhaFulv1	1291018	0.00318468	798640	492378	1.62	100491	0.000247891	105984	0.000261441	206475	0.000509332	1.05
icSilAtra2	icSilAtra2	10728996	0.00969865	5054646	5674350	0.89	810347	0.000732526	857632	0.00077527	1667979	0.0015078	1.06
idAcrOrbc1	idAcrOrbc1	1200861	0.00571513	662161	538700	1.23	112535	0.000535576	117072	0.000557168	229607	0.00109274	1.04
idBacElon1	idBacElon1	3600440	0.00816404	1694651	1905789	0.89	412864	0.000936174	433480	0.000982921	846344	0.0019191	1.05
idBelPand1	idBelPand1	3886943	0.00665295	1889538	1997405	0.95	438908	0.000751242	458643	0.000785021	897551	0.00153626	1.04
idBerChal2	idBerChal2	1335300	0.00253821	721866	613434	1.18	129723	0.000246584	130227	0.000247542	259950	0.000494126	1
idBibMarc1	idBibMarc1	3445162	0.0107992	1590920	1854242	0.86	408810	0.00128146	425490	0.00133374	834300	0.0026152	1.04
idBleFall4	idBleFall4	773027	0.00174968	417019	356008	1.17	67007	0.000151664	70445	0.000159446	137452	0.000311111	1.05
idBomDisc1	idBomDisc1	580406	0.00235434	312984	267422	1.17	164656	0.000667906	163825	0.000664535	328481	0.00133244	0.99
idBomMajo1	idBomMajo1	1156241	0.00459928	614635	541606	1.13	291260	0.00115857	297690	0.00118415	588950	0.00234272	1.02
idBraLaph1	idBraLaph1	3755610	0.00361047	2160934	1594676	1.36	229722	0.000220844	243976	0.000234547	473698	0.000455392	1.06
idCalVomi1	idCalVomi1	5410930	0.00780177	2508164	2902766	0.86	543917	0.000784248	568355	0.000819484	1112272	0.00160373	1.04
idCheImpr3	idCheImpr3	3397379	0.00912835	1734636	1662743	1.04	293429	0.000788409	316148	0.000849452	609577	0.00163786	1.08
idChePaga1	idChePaga1	3455046	0.00993409	1763007	1692039	1.04	298664	0.000858731	321683	0.000924916	620347	0.00178365	1.08
idCheUrba1	idCheUrba1	4911848	0.00939021	2524983	2386865	1.06	434231	0.000830139	460701	0.000880743	894932	0.00171088	1.06
idCheVern2	idCheVern2	3631908	0.00882987	1812164	1819744	1	384195	0.000934052	411777	0.00100111	795972	0.00193516	1.07
idCheVulp2	idCheVulp2	2000081	0.00511155	952539	1047542	0.91	200753	0.000513059	210671	0.000538406	411424	0.00105146	1.05
idChrBici1	idChrBici1	5527290	0.00623293	2881406	2645884	1.09	619427	0.000698506	643117	0.00072522	1262544	0.00142373	1.04
idCisGlob1	idCisGlob1	9409621	0.0139953	4860005	4549616	1.07	709389	0.0010551	747360	0.00111158	1456749	0.00216668	1.05
idCluTigr1	idCluTigr1	420566	0.000495961	201738	218828	0.92	32133	3.7893e-05	34291	4.0438e-05	66424	7.8332e-05	1.07
idCoePili4	idCoePili4	1181377	0.00465994	610382	570995	1.07	138038	0.000544491	138556	0.000546534	276594	0.00109103	1
idCorMarg1	idCorMarg1	4437316	0.00458378	2060761	2376555	0.87	418283	0.000432089	441064	0.000455622	859347	0.000887711	1.05
idCriBerb1	idCriBerb1	383719	0.000967949	207203	176516	1.17	32112	8.1004e-05	33420	8.4303e-05	65532	0.000165307	1.04
idDasAlbo1	idDasAlbo1	6446574	0.0101122	3289141	3157433	1.04	581362	0.000911938	601863	0.000944096	1183225	0.00185603	1.04
idEpiBalt1	idEpiBalt1	3143969	0.00599845	1466530	1677439	0.87	514062	0.00098079	516816	0.000986045	1030878	0.00196684	1.01
idEpiEuco1	idEpiEuco1	4526902	0.00882719	2247700	2279202	0.99	605641	0.00118096	633252	0.00123481	1238893	0.00241577	1.05
idEpiGros1	idEpiGros1	3811144	0.00702508	1791186	2019958	0.89	516610	0.000952267	531987	0.000980612	1048597	0.00193288	1.03
idEpiSucc1	idEpiSucc1	2881736	0.00768218	1424503	1457233	0.98	326481	0.000870338	339768	0.000905759	666249	0.0017761	1.04
idEriArbu1	idEriArbu1	5816425	0.0139095	3059891	2756534	1.11	353633	0.000845684	370603	0.000886266	724236	0.00173195	1.05
idEriPert2	idEriPert2	3622671	0.00826542	1845401	1777270	1.04	283154	0.000646039	295840	0.000674983	578994	0.00132102	1.04
idEriSepu1	idEriSepu1	5840286	0.0160108	3211535	2628751	1.22	329677	0.000903788	358844	0.000983748	688521	0.00188754	1.09
idEriTena2	idEriTena2	5006555	0.0111796	2530285	2476270	1.02	363071	0.000810732	398220	0.000889219	761291	0.00169995	1.1
idEupCoro1	idEupCoro1	6887242	0.0113036	3390810	3496432	0.97	521321	0.000855609	556153	0.000912777	1077474	0.00176839	1.07
idEupLati1	idEupLati1	5501570	0.00725734	2772024	2729546	1.02	625873	0.000825614	651129	0.00085893	1277002	0.00168454	1.04
idGymRotn1	idGymRotn1	6510093	0.00881037	3197277	3312816	0.97	579857	0.000784744	606265	0.000820483	1186122	0.00160523	1.05
idLeuLate1	idLeuLate1	4419854	0.00734066	2043973	2375881	0.86	439304	0.000729613	463376	0.000769592	902680	0.0014992	1.05
idLypDubi1	idLypDubi1	3058613	0.00522931	1343568	1715045	0.78	361783	0.00061854	379369	0.000648607	741152	0.00126715	1.05
idMacAtri3	idMacAtri3	1291213	0.00619417	684718	606495	1.13	157302	0.000754605	164358	0.000788454	321660	0.00154306	1.04
idMelAuri2	idMelAuri2	4428581	0.0120784	2118431	2310150	0.92	511729	0.00139568	537201	0.00146515	1048930	0.00286083	1.05
idMelMell2	idMelMell2	3784518	0.0053675	1992443	1792075	1.11	389426	0.000552314	400045	0.000567375	789471	0.00111969	1.03
idMyaFlor2	idMyaFlor2	2632599	0.005836	1492498	1140101	1.31	187623	0.000415927	195844	0.000434151	383467	0.000850078	1.04
idMyoTess1	idMyoTess1	607342	0.00325193	291249	316093	0.92	61670	0.000330203	64568	0.00034572	126238	0.000675923	1.05
idNemNigr1	idNemNigr1	5517856	0.00802161	3085008	2432848	1.27	297452	0.000432422	318382	0.000462849	615834	0.000895271	1.07
idNeoCyan1	idNeoCyan1	1590039	0.00435193	823263	766776	1.07	113358	0.00031026	122207	0.00033448	235565	0.00064474	1.08
idNeoInte1	idNeoInte1	5407528	0.0094237	2898704	2508824	1.16	409006	0.000712775	442358	0.000770897	851364	0.00148367	1.08
idNepAppe1	idNepAppe1	5289928	0.00490588	2784735	2505193	1.11	448390	0.000415837	468857	0.000434818	917247	0.000850655	1.05
idNepFlae1	idNepFlae1	8300567	0.00884733	4441419	3859148	1.15	727965	0.000775917	795439	0.000847835	1523404	0.00162375	1.09
idNepScut1	idNepScut1	1988053	0.00339018	927538	1060515	0.87	176097	0.000300294	188198	0.000320929	364295	0.000621223	1.07
idNowFero1	idNowFero1	5214318	0.00849612	2476494	2737824	0.9	615739	0.00100327	643144	0.00104793	1258883	0.0020512	1.04
idPheCory1	idPheCory1	6218794	0.00737755	3036844	3181950	0.95	539932	0.000640538	567468	0.000673205	1107400	0.00131374	1.05
idPhyMeln1	idPhyMeln1	2657144	0.00372778	1301567	1355577	0.96	251425	0.000352731	260533	0.000365509	511958	0.000718241	1.04
idPlaAlba1	idPlaAlba3	4461999	0.00687496	2400792	2061207	1.16	608366	0.000937358	256234	0.0003948	864600	0.00133216	0.42
idPlaAlba1	idPlaAlba4	10960251	0.0168873	5396454	5563797	0.97	1166840	0.00179784	1168974	0.00180113	2335814	0.00359898	1
idPlaAlba1	idPlaAlba1	3872452	0.0059666	1930808	1941644	0.99	474559	0.000731191	484963	0.000747221	959522	0.00147841	1.02
idPoeNobi2	idPoeNobi2	4012483	0.00435165	2102526	1909957	1.1	595296	0.000645615	596913	0.000647369	1192209	0.00129298	1
idPolAmen1	idPolAmen1	7549672	0.00608162	3199374	4350298	0.74	761996	0.000613824	803890	0.000647571	1565886	0.0012614	1.05
idPolAngu1	idPolAngu1	5442088	0.0040629	2308275	3133813	0.74	646569	0.000482708	675588	0.000504373	1322157	0.000987082	1.04
idPolDomi1	idPolDomi1	6030595	0.00610716	2787480	3243115	0.86	664261	0.000672694	704026	0.000712964	1368287	0.00138566	1.06
idProAzur1	idProAzur1	7015773	0.00822982	3712883	3302890	1.12	860131	0.00100897	896035	0.00105109	1756166	0.00206006	1.04
idRhiCamp1	idRhiCamp1	6153681	0.00944125	2837880	3315801	0.86	530637	0.000814127	555864	0.000852832	1086501	0.00166696	1.05
idSarCaer1	idSarCaer1	6499202	0.0111776	3396467	3102735	1.09	676849	0.00116407	701739	0.00120688	1378588	0.00237095	1.04
idSarRose1	idSarRose1	6387995	0.0122422	3381647	3006348	1.12	588726	0.00112826	625114	0.001198	1213840	0.00232625	1.06
idSarSubv1	idSarSubv1	6782902	0.0100015	3537305	3245597	1.09	633766	0.0009345	672602	0.000991765	1306368	0.00192626	1.06
idSarVari1	idSarVari1	6760122	0.0098653	3523232	3236890	1.09	636744	0.000929224	666299	0.000972355	1303043	0.00190158	1.05
idScaPyra1	idScaPyra1	3911481	0.0125866	1907648	2003833	0.95	508489	0.00163625	536707	0.00172705	1045196	0.00336331	1.06
idSicFerr1	idSicFerr1	1714582	0.00703132	901965	812617	1.11	151729	0.000622224	156377	0.000641285	308106	0.00126351	1.03
idSphTaen1	idSphTaen1	3288972	0.00548626	1647039	1641933	1	395108	0.00065907	399257	0.000665991	794365	0.00132506	1.01
idStoLuna1	idStoLuna1	5011801	0.00706666	2429401	2582400	0.94	563273	0.000794217	579923	0.000817694	1143196	0.00161191	1.03
idSuiVari3	idSuiVari3	2003514	0.00778621	909812	1093702	0.83	242404	0.000942049	252474	0.000981184	494878	0.00192323	1.04
idSyrPipi1	idSyrPipi10	6293560	0.0201963	3651643	2641917	1.38	515614	0.00165463	494149	0.00158574	1009763	0.00324037	0.96
idSyrPipi1	idSyrPipi11	6130725	0.0196737	3555416	2575309	1.38	504302	0.00161833	482860	0.00154952	987162	0.00316784	0.96
idSyrPipi1	idSyrPipi2	6118817	0.0196355	3550033	2568784	1.38	504849	0.00162008	484688	0.00155538	989537	0.00317546	0.96
idSyrPipi1	idSyrPipi5	6111217	0.0196111	3545925	2565292	1.38	503162	0.00161467	484673	0.00155533	987835	0.00317	0.96
idSyrPipi1	idSyrPipi6	6244312	0.0200382	3621900	2622412	1.38	512727	0.00164536	491513	0.00157729	1004240	0.00322265	0.96
idSyrPipi1	idSyrPipi7	6064228	0.0194604	3516022	2548206	1.38	500897	0.0016074	478993	0.00153711	979890	0.00314451	0.96
idSyrPipi1	idSyrPipi8	6264978	0.0201046	3635699	2629279	1.38	513968	0.00164934	492848	0.00158157	1006816	0.00323091	0.96
idSyrPipi1	idSyrPipi9	6143513	0.0197148	3564502	2579011	1.38	506544	0.00162552	483790	0.0015525	990334	0.00317802	0.96
idSyrPipi1	idSyrPipi1	3634313	0.0116627	2119133	1515180	1.4	310872	0.000997601	327328	0.00105041	638200	0.00204801	1.05
idTacFera2	idTacFera2	6863972	0.00930796	3216419	3647553	0.88	716098	0.000971072	739742	0.00100313	1455840	0.00197421	1.03
idTacLuri1	idTacLuri1	3353909	0.00385159	1615599	1738310	0.93	465325	0.000534373	487986	0.000560397	953311	0.00109477	1.05
idTheAcut1	idTheAcut1	2937959	0.00433179	1608970	1328989	1.21	319447	0.000470999	329972	0.000486517	649419	0.000957516	1.03
idTheAtra2	idTheAtra2	2343752	0.0109167	1153752	1190000	0.97	161920	0.000754192	170699	0.000795083	332619	0.00154927	1.05
idTheSoli1	idTheSoli1	1615299	0.00405155	794924	820375	0.97	267016	0.000669738	268550	0.000673586	535566	0.00134332	1.01
idVolInan1	idVolInan1	5376912	0.0058716	3042051	2334861	1.3	405233	0.000442515	430891	0.000470534	836124	0.000913049	1.06
idVolInfl1	idVolInfl1	2358830	0.00324266	1281152	1077678	1.19	156939	0.000215743	167271	0.000229946	324210	0.000445689	1.07
idXanPedi1	idXanPedi1	7337596	0.00822614	3409071	3928525	0.87	648029	0.000726502	682945	0.000765646	1330974	0.00149215	1.05
idXylSylv2	idXylSylv2	2220359	0.00502036	1197512	1022847	1.17	195141	0.000441225	207598	0.000469391	402739	0.000910617	1.06
ihAcaHaem1	ihAcaHaem1	6364541	0.0089148	3335592	3028949	1.1	509079	0.000713066	535521	0.000750103	1044600	0.00146317	1.05
ihAelAcum1	ihAelAcum1	8679613	0.00906733	4176296	4503317	0.93	776552	0.00081124	781272	0.000816171	1557824	0.00162741	1.01
ihDrePlat2	ihDrePlat2	1630693	0.00574641	897539	733154	1.22	333736	0.00117605	336214	0.00118479	669950	0.00236084	1.01
ihGonAcut1	ihGonAcut1	5247948	0.00541898	2440284	2807664	0.87	549208	0.000567107	553126	0.000571152	1102334	0.00113826	1.01
iiAthCine2	iiAthCine2	3576711	0.00524582	1757276	1819435	0.97	433985	0.000636509	467051	0.000685006	901036	0.00132152	1.08
iiGlyPell1	iiGlyPell1	3880790	0.00390681	2020765	1860025	1.09	403561	0.000406266	423886	0.000426728	827447	0.000832994	1.05
iiLimLuna2	iiLimLuna2	10283784	0.00863557	5042884	5240900	0.96	881680	0.00074037	921055	0.000773434	1802735	0.00151381	1.04
iiLimMarm1	iiLimMarm1	9497568	0.00603809	5003176	4494392	1.11	922523	0.000586495	942206	0.000599009	1864729	0.0011855	1.02
iiLimRhom1	iiLimRhom1	8517147	0.00563625	4256079	4261068	1	801305	0.000530266	825634	0.000546366	1626939	0.00107663	1.03
ilAbrTril1	ilAbrTril1	4785147	0.0140176	2472248	2312899	1.07	368459	0.00107936	406366	0.00119041	774825	0.00226977	1.1
ilAbrTrip1	ilAbrTrip1	2958079	0.00821579	1424775	1533304	0.93	246068	0.000683431	258678	0.000718454	504746	0.00140189	1.05
ilAceEphe1	ilAceEphe1	4541787	0.0139665	2142210	2399577	0.89	373189	0.0011476	403309	0.00124022	776498	0.00238782	1.08
ilAchFlav2	ilAchFlav2	2746594	0.00644627	1168310	1578284	0.74	289186	0.000678721	315286	0.000739977	604472	0.0014187	1.09
ilAclCris2	ilAclCris2	1621206	0.00368957	769612	851594	0.9	158292	0.000360244	175043	0.000398366	333335	0.00075861	1.11
ilAclEmar1	ilAclEmar1	973752	0.00165006	423330	550422	0.77	107966	0.000182953	116787	0.0001979	224753	0.000380853	1.08
ilAclLite1	ilAclLite1	3266254	0.00571057	1522311	1743943	0.87	286606	0.000501089	309579	0.000541254	596185	0.00104234	1.08
ilAclSpar1	ilAclSpar1	4883337	0.00995199	2292871	2590466	0.89	461191	0.000939883	494432	0.00100763	955623	0.00194751	1.07
ilAcrAcer1	ilAcrAcer1	3543657	0.00831843	1746663	1796994	0.97	324194	0.000761018	349765	0.000821044	673959	0.00158206	1.08
ilAcrLepo1	ilAcrLepo1	4023898	0.00946546	1852864	2171034	0.85	420884	0.00099005	460051	0.00108218	880935	0.00207223	1.09
ilAcrPsix1	ilAcrPsix1	3772108	0.00977782	1897638	1874470	1.01	374858	0.000971684	407850	0.0010572	782708	0.00202889	1.09
ilAcrSuav1	ilAcrSuav1	2264047	0.00379713	1155462	1108585	1.04	229385	0.000384712	243580	0.000408519	472965	0.000793231	1.06
ilAglIoxx1	ilAglIoxx1	2088396	0.00570168	1091474	996922	1.09	221886	0.000605787	233895	0.000638573	455781	0.00124436	1.05
ilAglUrti1	ilAglUrti1	6085320	0.0167904	3073907	3011413	1.02	503874	0.00139027	542426	0.00149664	1046300	0.00288691	1.08
ilAgoAren1	ilAgoAren1	2930886	0.00566743	1366517	1564369	0.87	299428	0.000579001	319300	0.000617427	618728	0.00119643	1.07
ilAgoSubp1	ilAgoSubp1	2985313	0.00497924	1440951	1544362	0.93	342643	0.000571498	366360	0.000611056	709003	0.00118255	1.07
ilAgrAura1	ilAgrAura1	2548761	0.00548066	1229392	1319369	0.93	265460	0.000570825	283261	0.000609103	548721	0.00117993	1.07
ilAgrCirc1	ilAgrCirc1	6005091	0.0109511	2823395	3181696	0.89	556631	0.00101509	594835	0.00108476	1151466	0.00209986	1.07
ilAgrLeuc1	ilAgrLeuc1	4637495	0.00990679	2248879	2388616	0.94	482894	0.00103158	516478	0.00110332	999372	0.0021349	1.07
ilAgrLota1	ilAgrLota1	5848422	0.00960695	2873094	2975328	0.97	480061	0.000788575	508755	0.00083571	988816	0.00162429	1.06
ilAgrMaci1	ilAgrMaci1	1964065	0.00306516	902553	1061512	0.85	212634	0.000331841	223971	0.000349533	436605	0.000681374	1.05
ilAgrMarg1	ilAgrMarg1	5362527	0.0111812	2604535	2757992	0.94	515462	0.00107477	563159	0.00117422	1078621	0.00224899	1.09
ilAgrTris1	ilAgrTris1	1969509	0.00267244	973044	996465	0.98	245153	0.00033265	255098	0.000346145	500251	0.000678795	1.04
ilAllOxya1	ilAllOxya1	3417917	0.00780016	1645320	1772597	0.93	320878	0.000732288	353266	0.000806202	674144	0.00153849	1.1
ilAlsAesc1	ilAlsAesc1	3871893	0.00487831	1813241	2058652	0.88	440284	0.000554727	464248	0.00058492	904532	0.00113965	1.05
ilAmpBerb1	ilAmpBerb1	3262333	0.00587384	1755009	1507324	1.16	267444	0.000481533	276735	0.000498262	544179	0.000979795	1.03
ilAmpLuce6	ilAmpLuce6	4450312	0.00725489	2415936	2034376	1.19	445118	0.000725631	478252	0.000779646	923370	0.00150528	1.07
ilAmpOcul1	ilAmpOcul1	3458074	0.00544837	1822605	1635469	1.11	355559	0.000560201	379800	0.000598394	735359	0.0011586	1.07
ilAmpTrag2	ilAmpTrag2	4040616	0.0052592	2210581	1830035	1.21	348715	0.000453882	372353	0.000484649	721068	0.000938531	1.07
ilAnaInnx2	ilAnaInnx2	1405831	0.00516962	696036	709795	0.98	144358	0.000530844	156781	0.000576527	301139	0.00110737	1.09
ilAnoMund1	ilAnoMund1	6348202	0.00728262	3036180	3312022	0.92	510154	0.000585246	551986	0.000633235	1062140	0.00121848	1.08
ilAntCard3	ilAntCard3	2354371	0.00706249	1079734	1274637	0.85	269456	0.000808297	297446	0.000892259	566902	0.00170056	1.1
ilAntChix2	ilAntChix2	5527634	0.00922682	2789383	2738251	1.02	455986	0.000761139	489113	0.000816435	945099	0.00157757	1.07
ilAntDeri1	ilAntDeri1	2677669	0.00794946	1203263	1474406	0.82	247219	0.000733944	273204	0.000811088	520423	0.00154503	1.11
ilApaEpom1	ilApaEpom1	878396	0.00153185	423293	455103	0.93	87152	0.000151986	88768	0.000154804	175920	0.000306789	1.02
ilApaMono1	ilApaMono1	6550272	0.0121066	3465878	3084394	1.12	588394	0.0010875	620076	0.00114606	1208470	0.00223356	1.05
ilApaSord1	ilApaSord1	5702023	0.00980065	2863093	2838930	1.01	623148	0.00107107	675182	0.0011605	1298330	0.00223157	1.08
ilApeSyri1	ilApeSyri1	3177845	0.00633585	1576774	1601071	0.98	266159	0.000530657	282776	0.000563787	548935	0.00109444	1.06
ilAplEffo1	ilAplEffo1	1626281	0.004988	809492	816789	0.99	183444	0.000562644	194443	0.00059638	377887	0.00115902	1.06
ilApoBetu1	ilApoBetu1	2441538	0.00392597	1174848	1266690	0.93	335110	0.000538854	351849	0.00056577	686959	0.00110462	1.05
ilApoBist1	ilApoBist1	3581779	0.00992606	1766969	1814810	0.97	372401	0.00103202	406789	0.00112732	779190	0.00215934	1.09
ilApoCapr1	ilApoCapr1	1420686	0.00209298	681582	739104	0.92	205307	0.000302462	212379	0.00031288	417686	0.000615342	1.03
ilApoCrat1	ilApoCrat1	1719196	0.00785422	865752	853444	1.01	172515	0.000788142	179767	0.000821273	352282	0.00160942	1.04
ilApoHisp1	ilApoHisp1	2697415	0.00669877	1306725	1390690	0.94	275583	0.000684384	293001	0.00072764	568584	0.00141202	1.06
ilApoLima1	ilApoLima1	449202	0.000603157	204725	244477	0.84	48412	6.5004e-05	49530	6.6505e-05	97942	0.00013151	1.02
ilApoLuen1	ilApoLuen1	4238605	0.00459861	2206500	2032105	1.09	411974	0.000446965	429673	0.000466167	841647	0.000913131	1.04
ilApoNigr3	ilApoNigr3	5367486	0.0076987	2765657	2601829	1.06	464543	0.000666304	484804	0.000695365	949347	0.00136167	1.04
ilApoTurb1	ilApoTurb1	1901127	0.00289545	873824	1027303	0.85	258210	0.000393259	276010	0.000420369	534220	0.000813628	1.07
ilArcCraa1	ilArcCraa1	939948	0.00171854	473271	466677	1.01	132243	0.000241784	137747	0.000251847	269990	0.000493632	1.04
ilArcXylo1	ilArcXylo1	2924240	0.00509667	1516056	1408184	1.08	333854	0.000581875	345800	0.000602696	679654	0.00118457	1.04
ilAriAges1	ilAriAges2	6017551	0.0153104	3124462	2893089	1.08	707061	0.00179897	689451	0.00175416	1396512	0.00355313	0.98
ilAriAges1	ilAriAges1	3393909	0.00863508	1767485	1626424	1.09	393895	0.00100218	413955	0.00105322	807850	0.0020554	1.05
ilAriArta2	ilAriArta2	1884180	0.00456206	971262	912918	1.06	227533	0.000550913	244035	0.000590868	471568	0.00114178	1.07
ilAteCent1	ilAteCent1	1002908	0.00113364	498455	504453	0.99	110656	0.000125081	114561	0.000129495	225217	0.000254576	1.04
ilAthMouf1	ilAthMouf1	3168208	0.00400902	1507357	1660851	0.91	345290	0.000436927	361771	0.000457782	707061	0.000894709	1.05
ilAutGamm1	ilAutGamm1	3803604	0.0113624	1824029	1979575	0.92	271584	0.000811293	285675	0.000853386	557259	0.00166468	1.05
ilAutPulc1	ilAutPulc1	3278262	0.00901686	1575036	1703226	0.92	334098	0.000918936	353687	0.000972816	687785	0.00189175	1.06
ilBemIchn1	ilBemIchn1	2071002	0.00420838	1097048	973954	1.13	312438	0.000634889	322598	0.000655535	635036	0.00129042	1.03
ilBicAnyn1	ilBicAnyn1	1980765	0.00457247	1042556	938209	1.11	172066	0.000397203	189956	0.000438501	362022	0.000835705	1.1
ilBisBetu1	ilBisBetu1	1538799	0.00398976	831673	707126	1.18	185897	0.00048199	196976	0.000510715	382873	0.000992704	1.06
ilBlaAdus2	ilBlaAdus2	5049749	0.00985632	2577757	2471992	1.04	328516	0.000641212	350622	0.000684359	679138	0.00132557	1.07
ilBlaLact1	ilBlaLact1	6370400	0.0117727	3193367	3177033	1.01	433801	0.000801675	479171	0.00088552	912972	0.0016872	1.1
ilBolSele5	ilBolSele5	2685450	0.00748577	1334547	1350903	0.99	287945	0.000802655	307879	0.000858222	595824	0.00166088	1.07
ilBraVimi1	ilBraVimi1	4913729	0.00662732	2273372	2640357	0.86	533274	0.000719246	573015	0.000772846	1106289	0.00149209	1.07
ilCalPalu1	ilCalPalu1	1526775	0.00220163	705469	821306	0.86	133846	0.000193008	142642	0.000205692	276488	0.0003987	1.07
ilCamMarg1	ilCamMarg1	1511218	0.00477507	759194	752024	1.01	123421	0.000389979	128737	0.000406776	252158	0.000796755	1.04
ilCarClav1	ilCarClav1	3329244	0.00745983	1768525	1560719	1.13	273070	0.000611867	292324	0.00065501	565394	0.00126688	1.07
ilCarKade1	ilCarKade1	1708928	0.00425969	901738	807190	1.12	120786	0.000301072	125954	0.000313954	246740	0.000615027	1.04
ilCarPala2	ilCarPala2	1900781	0.00508241	869331	1031450	0.84	232605	0.000621952	256133	0.000684863	488738	0.00130682	1.1
ilCarQuer1	ilCarQuer1	2092997	0.00542937	1015010	1077987	0.94	187284	0.000485827	200049	0.00051894	387333	0.00100477	1.07
ilCatFrax1	ilCatFrax1	2556475	0.00344125	1343683	1212792	1.11	187035	0.000251766	201781	0.000271616	388816	0.000523382	1.08
ilCelArgi3	ilCelArgi3	2811006	0.00591401	1306519	1504487	0.87	342875	0.000721367	361476	0.000760501	704351	0.00148187	1.05
ilChaFerr1	ilChaFerr1	5279686	0.00717437	2609965	2669721	0.98	503996	0.000684862	550526	0.00074809	1054522	0.00143295	1.09
ilCheLega1	ilCheLega1	987976	0.00334693	475410	512566	0.93	103760	0.000351504	109253	0.000370113	213013	0.000721617	1.05
ilChlSite2	ilChlSite2	2342840	0.00562528	1093184	1249656	0.87	243776	0.000585319	266273	0.000639336	510049	0.00122466	1.09
ilChrCulm1	ilChrCulm1	4866399	0.0079394	2194916	2671483	0.82	523814	0.000854589	555226	0.000905837	1079040	0.00176042	1.06
ilCloCurt1	ilCloCurt1	2760915	0.00581958	1230349	1530566	0.8	271929	0.000573184	292842	0.000617266	564771	0.00119045	1.08
ilColCroc2	ilColCroc2	1985562	0.00649949	930248	1055314	0.88	308835	0.00101093	333578	0.00109193	642413	0.00210286	1.08
ilColFlav1	ilColFlav1	6234385	0.00680751	3017331	3217054	0.94	632111	0.000690221	676248	0.000738415	1308359	0.00142864	1.07
ilConVacc3	ilConVacc3	3793950	0.00551174	1837509	1956441	0.94	432782	0.000628734	461067	0.000669825	893849	0.00129856	1.07
ilCosPyra2	ilCosPyra2	4802073	0.00629321	2465204	2336869	1.05	535223	0.00070142	563103	0.000737957	1098326	0.00143938	1.05
ilCosTrap1	ilCosTrap1	3521194	0.00447637	1692566	1828628	0.93	447865	0.000569355	472813	0.000601071	920678	0.00117043	1.06
ilCraLigu1	ilCraLigu1	745563	0.00184506	358716	386847	0.93	74303	0.000183879	76612	0.000189593	150915	0.000373472	1.03
ilCroElin1	ilCroElin1	3326197	0.00829857	1635394	1690803	0.97	302002	0.000753469	329449	0.000821947	631451	0.00157541	1.09
ilCyaSemi1	ilCyaSemi1	3286456	0.00788577	1676821	1609635	1.04	384888	0.000923529	401229	0.000962739	786117	0.00188627	1.04
ilCybMeso1	ilCybMeso1	2465227	0.00275273	1173332	1291895	0.91	283236	0.000316267	298960	0.000333825	582196	0.000650093	1.06
ilCydAmpl1	ilCydAmpl1	1088577	0.0023452	559174	529403	1.06	151133	0.000325596	164944	0.00035535	316077	0.000680946	1.09
ilCydSple1	ilCydSple1	2210708	0.00403337	1078161	1132547	0.95	270534	0.000493581	286047	0.000521884	556581	0.00101546	1.06
ilCydStro3	ilCydStro1	4582916	0.00952805	2290578	2292338	1	582939	0.00121195	590974	0.00122866	1173913	0.00244061	1.01
ilCydStro3	ilCydStro3	2753162	0.00572393	1378106	1375056	1	347879	0.000723253	375811	0.000781325	723690	0.00150458	1.08
ilDeiPorc1	ilDeiPorc1	5662072	0.0149255	2803511	2858561	0.98	397889	0.00104886	433356	0.00114235	831245	0.0021912	1.09
ilDiaChry1	ilDiaChry1	5222720	0.014395	2498952	2723768	0.92	434864	0.00119858	460799	0.00127006	895663	0.00246865	1.06
ilDiaMend1	ilDiaMend1	2581912	0.00367089	1234403	1347509	0.92	257585	0.000366227	270116	0.000384043	527701	0.00075027	1.05
ilDiaRubi1	ilDiaRubi1	3662025	0.0063696	1721833	1940192	0.89	442629	0.000769894	474675	0.000825633	917304	0.00159553	1.07
ilDicOoxx2	ilDicOoxx2	4934280	0.00555287	2513772	2420508	1.04	555062	0.000624648	580624	0.000653415	1135686	0.00127806	1.05
ilDilCaer1	ilDilCaer1	2312120	0.00317018	1203676	1108444	1.09	193985	0.000265976	207279	0.000284204	401264	0.00055018	1.07
ilDreFalc1	ilDreFalc1	457194	0.00146655	213766	243428	0.88	57161	0.000183357	61700	0.000197917	118861	0.000381273	1.08
ilDryErem1	ilDryErem1	7723694	0.0117478	3898561	3825133	1.02	495568	0.00075376	520659	0.000791924	1016227	0.00154568	1.05
ilDryLabe1	ilDryLabe1	3959013	0.00549161	1940656	2018357	0.96	412517	0.000572208	433666	0.000601544	846183	0.00117375	1.05
ilDryRufi1	ilDryRufi1	1440705	0.00406792	686536	754169	0.91	115743	0.000326807	125716	0.000354966	241459	0.000681774	1.09
ilEclSila1	ilEclSila1	1859283	0.00633457	888941	970342	0.92	228737	0.000779306	247262	0.000842421	475999	0.00162173	1.08
ilEilCani1	ilEilCani1	4075136	0.0058783	2101762	1973374	1.07	348533	0.000502751	369832	0.000533475	718365	0.00103623	1.06
ilEilDepe1	ilEilDepe1	3058882	0.00531077	1663286	1395596	1.19	352415	0.000611856	373605	0.000648646	726020	0.0012605	1.06
ilEilSoro1	ilEilSoro1	3303454	0.00487786	1715489	1587965	1.08	299051	0.000441577	319488	0.000471754	618539	0.00091333	1.07
ilEleCory1	ilEleCory1	2351857	0.0071255	1328170	1023687	1.3	237848	0.000720617	260438	0.000789058	498286	0.00150968	1.09
ilEleSimi1	ilEleSimi1	2615879	0.00361254	1261030	1354849	0.93	263426	0.000363792	280277	0.000387064	543703	0.000750856	1.06
ilEmmMono1	ilEmmMono1	1978905	0.00702308	933979	1044926	0.89	172713	0.000612954	184388	0.000654388	357101	0.00126734	1.07
ilEndFlam1	ilEndFlam1	3290352	0.00752705	1569895	1720457	0.91	400255	0.000915628	421209	0.000963562	821464	0.00187919	1.05
ilEnnFusc2	ilEnnFusc2	298590	0.000702147	157409	141181	1.11	32891	7.7345e-05	32455	7.6319e-05	65346	0.000153664	0.99
ilEnnQuei1	ilEnnQuei1	566799	0.00120335	304466	262333	1.16	67948	0.000144258	68638	0.000145723	136586	0.000289982	1.01
ilEpiBilu1	ilEpiBilu1	2846258	0.00470274	1337004	1509254	0.89	329399	0.000544251	346057	0.000571774	675456	0.00111602	1.05
ilEpiDema1	ilEpiDema1	1067293	0.00159158	504098	563195	0.9	121204	0.000180743	127839	0.000190638	249043	0.000371381	1.05
ilEpiNise2	ilEpiNise2	3995075	0.00741291	2002338	1992737	1	465795	0.000864288	505234	0.000937467	971029	0.00180175	1.08
ilEpiRame1	ilEpiRame1	2242966	0.00327231	1019983	1222983	0.83	281424	0.000410575	297888	0.000434595	579312	0.00084517	1.06
ilEraDefo1	ilEraDefo1	4660198	0.00932858	2137786	2522412	0.85	453931	0.000908659	487663	0.000976182	941594	0.00188484	1.07
ilEreAeth2	ilEreAeth2	2128936	0.00506382	1003983	1124953	0.89	305436	0.0007265	334458	0.000795531	639894	0.00152203	1.1
ilEreLige1	ilEreLige1	3244717	0.00669906	1513826	1730891	0.87	512625	0.00105837	547748	0.00113088	1060373	0.00218925	1.07
ilEryTage1	ilEryTage1	4295423	0.0137842	2135564	2159859	0.99	465020	0.00149227	492750	0.00158126	957770	0.00307354	1.06
ilEspSulp1	ilEspSulp1	1801144	0.00422117	904865	896279	1.01	177353	0.000415646	185877	0.000435623	363230	0.000851268	1.05
ilEucMixx1	ilEucMixx1	9652568	0.00436546	4890872	4761696	1.03	679526	0.000307322	709258	0.000320768	1388784	0.00062809	1.04
ilEudProf1	ilEudProf1	2953984	0.00461887	1502411	1451573	1.04	330597	0.000516924	362603	0.000566969	693200	0.00108389	1.1
ilEugGlar6	ilEugGlar6	4268524	0.00734811	2066539	2201985	0.94	405930	0.000698793	431980	0.000743638	837910	0.00144243	1.06
ilEulPrun1	ilEulPrun1	1445533	0.00576577	724217	721316	1	140210	0.000559253	151588	0.000604636	291798	0.00116389	1.08
ilEulTest2	ilEulTest2	1572417	0.0053442	785919	786498	1	173620	0.000590085	187013	0.000635604	360633	0.00122569	1.08
ilEupAbbr2	ilEupAbbr2	2966724	0.00841577	1313748	1652976	0.79	332606	0.000943511	363704	0.00103173	696310	0.00197524	1.09
ilEupCent1	ilEupCent1	3771297	0.00882382	1731829	2039468	0.85	379066	0.000886912	410935	0.000961477	790001	0.00184839	1.08
ilEupDodo1	ilEupDodo1	2540015	0.00755931	1185137	1354878	0.87	295564	0.000879624	320653	0.000954291	616217	0.00183391	1.08
ilEupExig1	ilEupExig1	1827157	0.00517642	910184	916973	0.99	198547	0.000562493	219270	0.000621202	417817	0.00118369	1.1
ilEupInsi1	ilEupInsi1	221725	0.000531789	101045	120680	0.84	26456	6.3453e-05	26699	6.4035e-05	53155	0.000127488	1.01
ilEupLuci1	ilEupLuci1	5240476	0.00842924	2561751	2678725	0.96	493292	0.000793454	534688	0.000860039	1027980	0.00165349	1.08
ilEupSimi1	ilEupSimi1	3193862	0.00663948	1588043	1605819	0.99	295854	0.000615029	316093	0.000657103	611947	0.00127213	1.07
ilEupTran1	ilEupTran1	4275252	0.0100014	1926398	2348854	0.82	462105	0.00108103	500525	0.00117091	962630	0.00225194	1.08
ilEupVulg1	ilEupVulg1	3387895	0.00788862	1617889	1770006	0.91	451341	0.00105094	492046	0.00114572	943387	0.00219665	1.09
ilEuzPing2	ilEuzPing2	684993	0.00157414	344295	340698	1.01	74252	0.000170634	76927	0.000176781	151179	0.000347415	1.04
ilFabAdip1	ilFabAdip1	3456515	0.00774281	1993154	1463361	1.36	337320	0.000755618	349581	0.000783084	686901	0.0015387	1.04
ilFurFurc1	ilFurFurc1	2689702	0.0039715	1306006	1383696	0.94	297041	0.000438598	310265	0.000458124	607306	0.000896721	1.04
ilGanPyra1	ilGanPyra1	1760830	0.00633781	916776	844054	1.09	201244	0.000724343	221114	0.000795862	422358	0.0015202	1.1
ilGlaAlex1	ilGlaAlex1	2251448	0.00394238	1168806	1082642	1.08	279618	0.000489623	295441	0.00051733	575059	0.00100695	1.06
ilGriApri1	ilGriApri1	2703123	0.00398303	1279824	1423299	0.9	197848	0.000291527	205286	0.000302487	403134	0.000594015	1.04
ilGymRufi1	ilGymRufi1	4080745	0.00961542	1708084	2372661	0.72	451332	0.00106347	493361	0.0011625	944693	0.00222597	1.09
ilHabPyri1	ilHabPyri1	145479	0.000386079	66869	78610	0.85	17493	4.6424e-05	16582	4.4006e-05	34075	9.043e-05	0.95
ilHecDyso1	ilHecDyso1	3624746	0.00613821	1887213	1737533	1.09	337909	0.000572221	362150	0.000613272	700059	0.00118549	1.07
ilHedSali1	ilHedSali1	1884303	0.00307578	891493	992810	0.9	178538	0.000291431	181757	0.000296685	360295	0.000588116	1.02
ilHemAest2	ilHemAest2	1612946	0.0033967	813957	798989	1.02	189610	0.000399299	202578	0.000426609	392188	0.000825908	1.07
ilHemChry1	ilHemChry1	1438151	0.0035291	673089	765062	0.88	174570	0.00042838	187851	0.00046097	362421	0.00088935	1.08
ilHerTari1	ilHerTari1	6234453	0.00831608	3155877	3078576	1.03	527399	0.000703493	564549	0.000753047	1091948	0.00145654	1.07
ilHesComm1	ilHesComm1	2757857	0.00599183	1407182	1350675	1.04	419492	0.000911405	437795	0.000951171	857287	0.00186257	1.04
ilHipSeme1	ilHipSeme1	3803148	0.0101566	2147663	1655485	1.3	376004	0.00100415	417698	0.0011155	793702	0.00211965	1.11
ilHofPseu3	ilHofPseu3	5448070	0.0145975	2625437	2822633	0.93	473733	0.00126931	515774	0.00138196	989507	0.00265127	1.09
ilHydFurc1	ilHydFurc1	1903732	0.0047557	878988	1024744	0.86	278021	0.000694523	299573	0.000748362	577594	0.00144289	1.08
ilHydMica1	ilHydMica1	2971362	0.00584004	1511729	1459633	1.04	373137	0.000733379	392321	0.000771084	765458	0.00150446	1.05
ilHylFasc1	ilHylFasc1	1578405	0.00507968	772302	806103	0.96	174056	0.000560153	182507	0.00058735	356563	0.0011475	1.05
ilHypCost1	ilHypCost1	4657145	0.00595368	2294461	2362684	0.97	487134	0.00062275	529658	0.000677113	1016792	0.00129986	1.09
ilHypProb1	ilHypProb1	2222140	0.00375672	1056630	1165510	0.91	239191	0.000404374	245762	0.000415482	484953	0.000819856	1.03
ilIdaAver1	ilIdaAver1	1884515	0.00464763	902180	982335	0.92	253993	0.000626403	273989	0.000675718	527982	0.00130212	1.08
ilIncMasc1	ilIncMasc1	1782149	0.00339282	821143	961006	0.85	148622	0.000282944	160274	0.000305127	308896	0.000588071	1.08
ilLacWlai2	ilLacWlai2	7467588	0.0088994	3853397	3614191	1.07	638756	0.000761229	678865	0.000809028	1317621	0.00157026	1.06
ilLamSuff1	ilLamSuff1	4607036	0.00836643	2149526	2457510	0.87	437756	0.00079497	468160	0.000850184	905916	0.00164515	1.07
ilLaoPopu1	ilLaoPopu1	3534750	0.00663526	1707376	1827374	0.93	301220	0.000565436	324023	0.00060824	625243	0.00117368	1.08
ilLasFlex1	ilLasFlex1	2972556	0.00697732	1488020	1484536	1	313526	0.000735923	337372	0.000791895	650898	0.00152782	1.08
ilLasMege1	ilLasMege1	4833238	0.0106394	2420613	2412625	1	385647	0.000848928	421319	0.000927453	806966	0.00177638	1.09
ilLatStri6	ilLatStri6	3000679	0.00531389	1456025	1544654	0.94	361717	0.000640563	396666	0.000702454	758383	0.00134302	1.1
ilLepSina1	ilLepSina1	5009078	0.00771831	2353159	2655919	0.89	447917	0.00069018	476484	0.000734197	924401	0.00142438	1.06
ilLeuSali1	ilLeuSali1	3702711	0.00529806	2000897	1701814	1.18	329135	0.000470946	351849	0.000503446	680984	0.000974392	1.07
ilLigAdus1	ilLigAdus1	2924139	0.00767094	1422404	1501735	0.95	267875	0.000702721	285630	0.000749298	553505	0.00145202	1.07
ilLimCami1	ilLimCami1	2678193	0.00662692	1361930	1316263	1.03	253354	0.000626899	273010	0.000675536	526364	0.00130244	1.08
ilLitOrni1	ilLitOrni1	4342182	0.00891113	1949486	2392696	0.81	422426	0.000866912	448862	0.000921165	871288	0.00178808	1.06
ilLitSemi2	ilLitSemi2	2275357	0.00442743	1107507	1167850	0.95	235217	0.000457689	250603	0.000487628	485820	0.000945317	1.07
ilLitSoci1	ilLitSoci1	2770915	0.0059289	1323364	1447551	0.91	305718	0.000654142	330690	0.000707575	636408	0.00136172	1.08
ilLobHalt1	ilLobHalt1	2619507	0.00878251	1199791	1419716	0.85	271191	0.000909231	291785	0.000978278	562976	0.00188751	1.08
ilLomBima1	ilLomBima1	4896065	0.00928719	2348420	2547645	0.92	395606	0.000750413	435239	0.000825591	830845	0.001576	1.1
ilLupTest1	ilLupTest1	3028579	0.0052706	1613231	1415348	1.14	349521	0.000608267	365718	0.000636455	715239	0.00124472	1.05
ilLycHirt1	ilLycHirt1	5514137	0.010433	2635405	2878732	0.92	634421	0.00120035	668721	0.00126525	1303142	0.00246561	1.05
ilLycPhla1	ilLycPhla1	4201909	0.0105066	2255502	1946407	1.16	403727	0.00100949	433261	0.00108334	836988	0.00209283	1.07
ilLymMona1	ilLymMona1	4111830	0.0048216	2312302	1799528	1.28	360724	0.000422991	376416	0.000441392	737140	0.000864384	1.04
ilLysBell1	ilLysBell1	3961117	0.0080436	2258954	1702163	1.33	431989	0.000877214	456304	0.000926589	888293	0.0018038	1.06
ilLysCori1	ilLysCori1	4060084	0.00801916	2285348	1774736	1.29	463082	0.000914643	488643	0.000965129	951725	0.00187977	1.06
ilMacNota1	ilMacNota1	1850239	0.00499461	862334	987905	0.87	204092	0.000550934	216709	0.000584993	420801	0.00113593	1.06
ilMamBras1	ilMamBras1	67003	0.000124074	33455	33548	1	8446	1.564e-05	9351	1.7316e-05	17797	3.2956e-05	1.11
ilManJurt1	ilManJurt4	9088082	0.0240777	4978572	4109510	1.21	1025441	0.00271677	1044794	0.00276804	2070235	0.00548482	1.02
ilManJurt1	ilManJurt1	3513734	0.00930918	1953246	1560488	1.25	379558	0.00100559	414650	0.00109856	794208	0.00210415	1.09
ilMarLuna1	ilMarLuna1	3356350	0.00473234	1647902	1708448	0.96	265194	0.000373915	281252	0.000396556	546446	0.000770471	1.06
ilMegAlbu1	ilMegAlbu1	3161140	0.0083326	1617861	1543279	1.05	259565	0.0006842	279648	0.000737138	539213	0.00142134	1.08
ilMelAtha1	ilMelAtha1	2750291	0.00483601	1403118	1347173	1.04	358807	0.000630913	372744	0.000655419	731551	0.00128633	1.04
ilMelCinx1	ilMelCinx1	4927593	0.0103362	2692857	2234736	1.21	435246	0.000912982	461743	0.000968563	896989	0.00188155	1.06
ilMelGala2	ilMelGala2	2148534	0.0037509	1160220	988314	1.17	344335	0.000601138	370824	0.000647382	715159	0.00124852	1.08
ilMelPers1	ilMelPers1	4388134	0.00722847	2251019	2137115	1.05	431402	0.000710639	461642	0.000760453	893044	0.00147109	1.07
ilMesFuru1	ilMesFuru1	5645072	0.00668183	2888985	2756087	1.05	573747	0.00067912	616579	0.000729818	1190326	0.00140894	1.07
ilMilMini2	ilMilMini2	2467482	0.0024874	1223623	1243859	0.98	251610	0.000253641	266408	0.000268559	518018	0.0005222	1.06
ilMimTili1	ilMimTili1	2742436	0.00602641	1347635	1394801	0.97	236491	0.000519681	253469	0.000556989	489960	0.00107667	1.07
ilMonLaev2	ilMonLaev1	9442651	0.0161027	4528349	4914302	0.92	1036155	0.00176698	1042204	0.00177729	2078359	0.00354427	1.01
ilMonLaev2	ilMonLaev2	4470217	0.00762315	2160812	2309405	0.94	479326	0.000817404	516255	0.00088038	995581	0.00169778	1.08
ilMusNiti1	ilMusNiti1	4284307	0.00832214	2134608	2149699	0.99	345446	0.000671018	380049	0.000738234	725495	0.00140925	1.1
ilMytAlbi1	ilMytAlbi1	8287756	0.0125374	4468753	3819003	1.17	655547	0.000991685	714216	0.00108044	1369763	0.00207212	1.09
ilMytFerr1	ilMytFerr1	6942369	0.00879579	3843269	3099100	1.24	617314	0.000782119	650575	0.00082426	1267889	0.00160638	1.05
ilMytImpu1	ilMytImpu1	6852837	0.00786308	3678944	3173893	1.16	663959	0.000761839	702855	0.000806469	1366814	0.00156831	1.06
ilNemSwae1	ilNemSwae1	2176030	0.00324447	1019592	1156438	0.88	263400	0.000392731	271959	0.000405492	535359	0.000798223	1.03
ilNocFimb1	ilNocFimb1	5711430	0.0107696	2833478	2877952	0.98	454923	0.000857815	474769	0.000895237	929692	0.00175305	1.04
ilNocJant1	ilNocJant1	2860863	0.00562963	1445206	1415657	1.02	248281	0.000488569	258527	0.000508731	506808	0.000997301	1.04
ilNocPron1	ilNocPron1	5723822	0.0118276	2889752	2834070	1.02	418494	0.000864767	460007	0.000950549	878501	0.00181532	1.1
ilNotDrom1	ilNotDrom1	3255610	0.010003	1459455	1796155	0.81	248572	0.000763745	274686	0.000843981	523258	0.00160773	1.11
ilNotUddm1	ilNotUddm1	3212332	0.00447729	1542551	1669781	0.92	346821	0.000483393	363700	0.000506918	710521	0.000990311	1.05
ilNotZicz1	ilNotZicz1	3464965	0.0103035	1564412	1900553	0.82	276948	0.000823537	294647	0.000876167	571595	0.0016997	1.06
ilNycReva1	ilNycReva1	5461087	0.00931161	2443481	3017606	0.81	526974	0.000898535	566863	0.000966549	1093837	0.00186508	1.08
ilNymNiti1	ilNymNiti1	4041987	0.00704921	1971311	2070676	0.95	330324	0.000576084	360935	0.000629469	691259	0.00120555	1.09
ilNymPoly1	ilNymPoly1	2860509	0.00764412	1414927	1445582	0.98	275311	0.000735712	290029	0.000775043	565340	0.00151075	1.05
ilOchPlec1	ilOchPlec1	4211121	0.00712628	2089279	2121842	0.98	461290	0.000780619	492037	0.00083265	953327	0.00161327	1.07
ilOchSylv3	ilOchSylv3	3170475	0.00923596	1511483	1658992	0.91	340831	0.00099288	363877	0.00106002	704708	0.0020529	1.07
ilOliLatr1	ilOliLatr1	3641448	0.00679293	1819643	1821805	1	434223	0.000810021	467894	0.000872832	902117	0.00168285	1.08
ilOmpLuno1	ilOmpLuno1	4175070	0.00666577	2178661	1996409	1.09	367029	0.000585986	389047	0.000621139	756076	0.00120713	1.06
ilOpeBrum1	ilOpeBrum1	3702442	0.00695348	1649915	2052527	0.8	323211	0.000607016	341892	0.0006421	665103	0.00124912	1.06
ilOpiLute1	ilOpiLute1	2166617	0.00622889	1136089	1030528	1.1	230212	0.000661845	244860	0.000703957	475072	0.0013658	1.06
ilOrgAnti1	ilOrgAnti2	3412474	0.00772925	1618736	1793738	0.9	380892	0.00086272	408589	0.000925454	789481	0.00178817	1.07
ilOrgAnti1	ilOrgAnti1	1811982	0.00410414	854923	957059	0.89	203736	0.000461462	224923	0.00050945	428659	0.000970912	1.1
ilOrtGrac1	ilOrtGrac1	6137679	0.00936686	2990933	3146746	0.95	523024	0.0007982	554532	0.000846285	1077556	0.00164449	1.06
ilOrtInce1	ilOrtInce1	7742515	0.00891089	3604637	4137878	0.87	637028	0.000733158	680505	0.000783196	1317533	0.00151635	1.07
ilPamAuri1	ilPamAuri1	1800178	0.00186127	877845	922333	0.95	227563	0.000235286	235360	0.000243348	462923	0.000478633	1.03
ilPamFasc1	ilPamFasc1	3116903	0.00602388	1546987	1569916	0.99	352989	0.000682204	374651	0.000724069	727640	0.00140627	1.06
ilPanCinn1	ilPanCinn1	2578117	0.00660669	1377340	1200777	1.15	265667	0.000680799	283303	0.000725993	548970	0.00140679	1.07
ilPapMach1	ilPapMach1	4159497	0.0180568	2114481	2045016	1.03	323766	0.0014055	353630	0.00153514	677396	0.00294064	1.09
ilParAegt1	ilParAegt1	1852586	0.00385484	808802	1043784	0.77	197783	0.000411545	214404	0.00044613	412187	0.000857675	1.08
ilParStra1	ilParStra1	5220226	0.0114479	2410010	2810216	0.86	430256	0.000943549	451324	0.000989751	881580	0.0019333	1.05
ilPerRhom1	ilPerRhom1	1550388	0.00326692	788943	761445	1.04	161126	0.000339518	174314	0.000367307	335440	0.000706826	1.08
ilPhaBuce1	ilPhaBuce1	5475360	0.00653842	2802516	2672844	1.05	394905	0.000471577	418024	0.000499185	812929	0.000970762	1.06
ilPheGnom1	ilPheGnom1	1669935	0.00642248	782909	887026	0.88	139399	0.000536121	150608	0.00057923	290007	0.00111535	1.08
ilPheTrem1	ilPheTrem1	1444101	0.00519031	668573	775528	0.86	118741	0.000426772	125602	0.000451432	244343	0.000878204	1.06
ilPhiVetu1	ilPhiVetu1	1418435	0.00190962	713923	704512	1.01	142507	0.000191855	139820	0.000188237	282327	0.000380092	0.98
ilPhlMeti2	ilPhlMeti2	3808091	0.00789496	1783433	2024658	0.88	343618	0.000712391	373974	0.000775326	717592	0.00148772	1.09
ilPhrFuli1	ilPhrFuli1	4984394	0.0090973	2367259	2617135	0.9	380014	0.000693585	411790	0.000751581	791804	0.00144517	1.08
ilPieBrab1	ilPieBrab1	1463606	0.00569903	662667	800939	0.83	155979	0.000607355	162522	0.000632833	318501	0.00124019	1.04
ilPieNapi4	ilPieNapi1	9258324	0.0303439	4068675	5189649	0.78	976274	0.00319971	955958	0.00313312	1932232	0.00633283	0.98
ilPieNapi4	ilPieNapi4	2602033	0.00852808	1170196	1431837	0.82	242772	0.000795678	280154	0.000918196	522926	0.00171387	1.15
ilPieRapa1	ilPieRapa1	3211163	0.0133377	1448862	1762301	0.82	315839	0.00131185	339178	0.00140879	655017	0.00272064	1.07
ilPleArgu1	ilPleArgu1	2741037	0.00760528	1525719	1215318	1.26	418475	0.0011611	435357	0.00120794	853832	0.00236904	1.04
ilPluXylo3	ilPluXylo3	1517477	0.00494166	732641	784836	0.93	149827	0.000487912	168406	0.000548414	318233	0.00103633	1.12
ilPolIcar1	ilPolIcar1	3555992	0.00753953	1844976	1711016	1.08	397742	0.000843306	417085	0.000884317	814827	0.00172762	1.05
ilPolLich1	ilPolLich1	4304278	0.00655032	2241226	2063052	1.09	328340	0.000499673	353975	0.000538685	682315	0.00103836	1.08
ilProPyga1	ilProPyga1	4635532	0.0115929	2433426	2202106	1.11	470727	0.00117723	528014	0.00132049	998741	0.00249772	1.12
ilPtiCapc1	ilPtiCapc1	2293312	0.00688513	1070786	1222526	0.88	188223	0.000565096	201076	0.000603684	389299	0.00116878	1.07
ilPyrFari1	ilPyrFari1	6457554	0.00695864	3526771	2930783	1.2	563127	0.000606824	610070	0.00065741	1173197	0.00126423	1.08
ilPyrMalv3	ilPyrMalv3	4859557	0.0070243	2417286	2442271	0.99	542008	0.000783451	593027	0.000857197	1135035	0.00164065	1.09
ilSatPavo1	ilSatPavo1	4755927	0.0101826	2320627	2435300	0.95	406255	0.000869805	432436	0.000925859	838691	0.00179566	1.06
ilSchCost1	ilSchCost1	1490429	0.00273973	723021	767408	0.94	170102	0.000312684	181513	0.00033366	351615	0.000646345	1.07
ilSelDent1	ilSelDent1	9133593	0.00928681	4359051	4774542	0.91	852198	0.000866494	903899	0.000919062	1756097	0.00178556	1.06
ilSesApif2	ilSesApif2	1310375	0.00252615	733461	576914	1.27	131153	0.000252837	141266	0.000272333	272419	0.00052517	1.08
ilSesBemb1	ilSesBemb1	1344151	0.00296522	669565	674586	0.99	174979	0.000386007	179085	0.000395065	354064	0.000781072	1.02
ilShaVerb5	ilShaVerb5	5444561	0.0141439	2861612	2582949	1.11	396101	0.00102899	429777	0.00111647	825878	0.00214546	1.09
ilSphPina1	ilSphPina1	2916705	0.00605999	1457425	1459280	1	220568	0.00045827	232386	0.000482824	452954	0.000941094	1.05
ilSpiLubr1	ilSpiLubr1	6462964	0.0117238	3303785	3159179	1.05	475616	0.000862767	522275	0.000947407	997891	0.00181017	1.1
ilSpiLutu1	ilSpiLutu1	2588127	0.00468107	1332722	1255405	1.06	222660	0.000402719	236695	0.000428104	459355	0.000830823	1.06
ilSteBipu1	ilSteBipu1	6288173	0.00849464	3014220	3273953	0.92	561645	0.000758722	612677	0.000827661	1174322	0.00158638	1.09
ilSynAndr1	ilSynAndr1	1035411	0.00312524	531199	504212	1.05	153634	0.000463723	163284	0.00049285	316918	0.000956573	1.06
ilSynForm1	ilSynForm1	2650273	0.00866581	1342176	1308097	1.03	366910	0.00119972	397509	0.00129977	764419	0.00249948	1.08
ilSynMyop1	ilSynMyop1	786146	0.00278841	405296	380850	1.06	98282	0.0003486	102924	0.000365065	201206	0.000713665	1.05
ilSynTipu2	ilSynTipu2	388945	0.00137566	190007	198938	0.96	63337	0.000224017	67953	0.000240343	131290	0.00046436	1.07
ilSynVesp1	ilSynVesp1	890823	0.0032408	458408	432415	1.06	119804	0.000435845	127067	0.000462268	246871	0.000898113	1.06
ilTelLucu1	ilTelLucu1	3491677	0.00868102	1763845	1727832	1.02	423967	0.00105407	461159	0.00114653	885126	0.0022006	1.09
ilThaMatu1	ilThaMatu1	2338006	0.00480958	1173292	1164714	1.01	293535	0.000603839	317952	0.000654068	611487	0.00125791	1.08
ilTheBrit1	ilTheBrit1	1922231	0.00535045	970627	951604	1.02	203443	0.000566275	224372	0.00062453	427815	0.00119081	1.1
ilTheObel3	ilTheObel3	1408858	0.00383305	709362	699496	1.01	147329	0.000400835	160327	0.000436198	307656	0.000837033	1.09
ilThoDeci1	ilThoDeci1	4666405	0.00369434	2428756	2237649	1.09	469644	0.000371812	496907	0.000393396	966551	0.000765208	1.06
ilThuSene1	ilThuSene1	3171209	0.00424329	1471805	1699404	0.87	281982	0.00037731	299389	0.000400602	581371	0.000777913	1.06
ilThyBati1	ilThyBati1	2313173	0.00774412	1095295	1217878	0.9	212354	0.000710926	230321	0.000771076	442675	0.001482	1.08
ilThySylv1	ilThySylv1	2743851	0.00633256	1386237	1357614	1.02	324248	0.000748335	349723	0.000807128	673971	0.00155546	1.08
ilTilAura1	ilTilAura1	996376	0.00130952	466375	530001	0.88	125293	0.00016467	127462	0.000167521	252755	0.000332191	1.02
ilTinPell1	ilTinPell1	2245341	0.00969671	1266130	979211	1.29	232033	0.00100205	251368	0.00108555	483401	0.00208761	1.08
ilTinSemi1	ilTinSemi1	3001289	0.00535325	1453495	1547794	0.94	353935	0.000631297	372609	0.000664604	726544	0.0012959	1.05
ilTinTrin1	ilTinTrin1	3236247	0.00922901	1679098	1557149	1.08	299511	0.000854134	315175	0.000898804	614686	0.00175294	1.05
ilTorAlte1	ilTorAlte1	1572057	0.00384264	768512	803545	0.96	137209	0.000335385	147237	0.000359897	284446	0.000695282	1.07
ilTriEmor1	ilTriEmor1	5448197	0.0102768	2765141	2683056	1.03	479623	0.000904704	524250	0.000988883	1003873	0.00189359	1.09
ilTyrJaco4	ilTyrJaco4	4465671	0.00795386	2164215	2301456	0.94	459498	0.000818418	486326	0.000866202	945824	0.00168462	1.06
ilUdeOliv2	ilUdeOliv2	1732630	0.00298711	844705	887925	0.95	145550	0.000250933	155300	0.000267742	300850	0.000518675	1.07
ilVanAtal1	ilVanAtal1	3439198	0.010049	1675664	1763534	0.95	308857	0.000902447	330467	0.000965589	639324	0.00186804	1.07
ilVanCard2	ilVanCard2	5304947	0.013474	2662243	2642704	1.01	398476	0.00101208	421539	0.00107066	820015	0.00208275	1.06
ilWatBina1	ilWatBina1	1805975	0.00586986	842295	963680	0.87	148899	0.000483958	157834	0.000512999	306733	0.000996957	1.06
ilXanIcte2	ilXanIcte2	6751245	0.0106095	3441446	3309799	1.04	668545	0.00105061	720359	0.00113204	1388904	0.00218265	1.08
ilXanSpad1	ilXanSpad1	2231014	0.00850901	1059708	1171306	0.9	284403	0.0010847	314356	0.00119894	598759	0.00228365	1.11
ilXesCnig1	ilXesCnig1	4957792	0.00692163	2453950	2503842	0.98	468709	0.00065437	498780	0.000696352	967489	0.00135072	1.06
ilXesSexs1	ilXesSexs1	2505792	0.00419278	1204209	1301583	0.93	274536	0.000459364	290434	0.000485965	564970	0.000945328	1.06
ilXesXant1	ilXesXant1	3907020	0.00442033	1968174	1938846	1.02	422165	0.00047763	444531	0.000502934	866696	0.000980564	1.05
ilXylAreo1	ilXylAreo1	2263121	0.00421195	1037671	1225450	0.85	186685	0.000347444	204848	0.000381248	391533	0.000728692	1.1
ilYpoCagn1	ilYpoCagn5	6144506	0.0117357	3163539	2980967	1.06	713251	0.00136227	716242	0.00136798	1429493	0.00273026	1
ilYpoCagn1	ilYpoCagn1	3792627	0.00724372	1951130	1841497	1.06	441211	0.00084269	478964	0.000914796	920175	0.00175749	1.09
ilYpoPade2	ilYpoPade1	6307055	0.0118453	3248733	3058322	1.06	734044	0.00137861	737541	0.00138518	1471585	0.0027638	1
ilYpoPade2	ilYpoPade2	3932995	0.00738659	2022256	1910739	1.06	459506	0.000863002	491499	0.000923088	951005	0.00178609	1.07
ilYpoPlub1	ilYpoPlub1	1479585	0.00243293	711474	768111	0.93	158026	0.000259848	162948	0.000267941	320974	0.000527789	1.03
ilYpoRore1	ilYpoRore1	2585986	0.0049846	1329955	1256031	1.06	317038	0.000611104	337375	0.000650304	654413	0.00126141	1.06
ilYpoSedl1	ilYpoSedl1	1044632	0.00166208	510798	533834	0.96	103497	0.000164671	105622	0.000168052	209119	0.000332723	1.02
ilYpsScab1	ilYpsScab1	4125724	0.00515139	2157724	1968000	1.1	363323	0.000453646	382251	0.00047728	745574	0.000930926	1.05
ilYpsSequ2	ilYpsSequ2	2956323	0.00375257	1512258	1444065	1.05	273462	0.000347116	282792	0.000358959	556254	0.000706074	1.03
ilZeuPyri1	ilZeuPyri1	2274923	0.00345383	1264682	1010241	1.25	207260	0.000314665	214636	0.000325864	421896	0.000640529	1.04
ilZygFili1	ilZygFili1	3260910	0.00959613	1753914	1506996	1.16	410520	0.00120807	441319	0.0012987	851839	0.00250677	1.08
inChrCarn1	inChrCarn1	7184767	0.0146917	3630600	3554167	1.02	678292	0.001387	738191	0.00150949	1416483	0.00289649	1.09
ioIscEleg1	ioIscEleg1	21039158	0.0136684	10871596	10167562	1.07	1071296	0.000695982	1106720	0.000718996	2178016	0.00141498	1.03
ioPlaPenn1	ioPlaPenn1	11733866	0.00734139	6125063	5608803	1.09	626018	0.000391673	652360	0.000408154	1278378	0.000799828	1.04
ioSymStri1	ioSymStri1	15978383	0.0139471	8206429	7771954	1.06	757098	0.000660851	793392	0.000692531	1550490	0.00135338	1.05
ipIsoGram3	ipIsoGram3	6617521	0.00894113	3362141	3255380	1.03	600047	0.000810742	610599	0.000824999	1210646	0.00163574	1.02
ipLeuNigr2	ipLeuNigr2	926801	0.00194437	418620	508181	0.82	112646	0.000236324	104668	0.000219587	217314	0.00045591	0.93
ipNemDubi1	ipNemDubi1	133235	0.000563549	61708	71527	0.86	24659	0.000104301	18513	7.8305e-05	43172	0.000182606	0.75
ipNemPict2	ipNemPict2	1076542	0.00483328	532227	544315	0.98	87119	0.000391132	92028	0.000413172	179147	0.000804304	1.06
ipProMont4	ipProMont4	603367	0.00276824	307260	296107	1.04	41057	0.000188369	41562	0.000190686	82619	0.000379056	1.01
iyAncNigr1	iyAncNigr1	645191	0.00278105	411920	233271	1.77	54470	0.000234789	55496	0.000239211	109966	0.000474	1.02
iyAndBuce1	iyAndBuce1	103508	0.00027271	59097	44411	1.33	22635	5.9636e-05	14736	3.8825e-05	37371	9.846e-05	0.65
iyAndDors1	iyAndDors1	513254	0.00190724	305426	207828	1.47	47213	0.000175442	42268	0.000157067	89481	0.000332509	0.9
iyAndFulv1	iyAndFulv1	283506	0.000765194	153079	130427	1.17	35120	9.479e-05	30174	8.1441e-05	65294	0.000176231	0.86
iyAndHaem1	iyAndHaem1	706882	0.00242693	418941	287941	1.45	54053	0.00018558	55278	0.000189786	109331	0.000375365	1.02
iyAndHatt1	iyAndHatt1	93962	0.000222611	53004	40958	1.29	15629	3.7028e-05	7758	1.838e-05	23387	5.5408e-05	0.5
iyAndMinu1	iyAndMinu1	981871	0.00280591	588526	393345	1.5	62146	0.000177596	62276	0.000177967	124422	0.000355563	1
iyAnoNige1	iyAnoNige1	1574476	0.00568384	942482	631994	1.49	108800	0.000392767	106126	0.000383114	214926	0.000775881	0.98
iyAthRosa1	iyAthRosa2	1439943	0.00842382	945061	494882	1.91	119489	0.000699024	97601	0.000570977	217090	0.00127	0.82
iyAthRosa1	iyAthRosa1	1386467	0.00811098	905860	480607	1.88	133739	0.000782388	128679	0.000752786	262418	0.00153517	0.96
iyBomHort1	iyBomHort1	3787	1.4381e-05	2098	1689	1.24	1301	4.94e-06	577	2.191e-06	1878	7.131e-06	0.44
iyBomPasc1	iyBomPasc1	986675	0.00365282	727366	259309	2.81	57379	0.000212426	59185	0.000219112	116564	0.000431537	1.03
iyBomPrat1	iyBomPrat1	760996	0.00277439	543055	217941	2.49	48427	0.000176552	49306	0.000179757	97733	0.000356308	1.02
iyBomTerr1	iyBomTerr1	748665	0.00257472	562287	186378	3.02	43477	0.000149521	44908	0.000154442	88385	0.000303963	1.03
iyBuaLabo1	iyBuaLabo1	1164478	0.00516438	656183	508295	1.29	128938	0.000571832	122083	0.00054143	251021	0.00111326	0.95
iyCamRapt1	iyCamRapt1	1223218	0.00562572	757957	465261	1.63	130937	0.000602195	130739	0.000601284	261676	0.00120348	1
iyCerRyby1	iyCerRyby1	2710594	0.00721854	1592367	1118227	1.42	116539	0.000310353	127020	0.000338265	243559	0.000648618	1.09
iyCliInci1	iyCliInci1	970978	0.00373548	552981	417997	1.32	82269	0.000316499	83302	0.000320474	165571	0.000636973	1.01
iyCoeConi1	iyCoeConi1	102397	0.000298139	60784	41613	1.46	8215	2.3919e-05	8105	2.3599e-05	16320	4.7517e-05	0.99
iyDolMedi1	iyDolMedi1	228305	0.001055	142623	85682	1.66	152231	0.000703463	144197	0.000666337	296428	0.0013698	0.95
iyEctCont1	iyEctCont1	1916605	0.00813853	1187282	729323	1.63	96101	0.000408076	100484	0.000426688	196585	0.000834764	1.05
iyEctLitu1	iyEctLitu1	9704	4.4891e-05	5133	4571	1.12	3404	1.5747e-05	1107	5.121e-06	4511	2.0868e-05	0.33
iyIchXant1	iyIchXant1	689321	0.00280028	374288	315033	1.19	72683	0.000295265	70564	0.000286657	143247	0.000581922	0.97
iyLasLatv2	iyLasLatv2	17761	5.0533e-05	9266	8495	1.09	7687	2.1871e-05	4291	1.2209e-05	11978	3.408e-05	0.56
iyLasMori1	iyLasMori1	2010	6.583e-06	1094	916	1.19	3489	1.1427e-05	3342	1.0946e-05	6831	2.2373e-05	0.96
iyLasPaux1	iyLasPaux1	1658917	0.00385656	1013644	645273	1.57	95135	0.000221165	100680	0.000234055	195815	0.00045522	1.06
iyMegLign1	iyMegLign1	954863	0.00425595	577224	377639	1.53	57492	0.000256249	62336	0.00027784	119828	0.000534089	1.08
iyMegWill1	iyMegWill1	2122124	0.00762255	1358747	763377	1.78	105956	0.000380588	119583	0.000429535	225539	0.000810123	1.13
iyMimDahl1	iyMimDahl1	21141	8.1706e-05	11357	9784	1.16	3264	1.2615e-05	1803	6.968e-06	5067	1.9583e-05	0.55
iyNetDila1	iyNetDila1	1503593	0.00514847	907349	596244	1.52	149645	0.000512401	152107	0.000520831	301752	0.00103323	1.02
iyNomFabr1	iyNomFabr1	1084370	0.00496503	611729	472641	1.29	50208	0.000229888	51589	0.000236212	101797	0.0004661	1.03
iyNomFuca1	iyNomFuca1	330852	0.00127596	186882	143970	1.3	21474	8.2817e-05	21088	8.1328e-05	42562	0.000164144	0.98
iyNysSpin1	iyNysSpin1	651761	0.00281928	333540	318221	1.05	37727	0.000163193	40221	0.000173981	77948	0.000337174	1.07
iyOphLute1	iyOphLute1	3369598	0.0052689	1898082	1471516	1.29	330094	0.000516154	328310	0.000513364	658404	0.00102952	0.99
iyPemLugu1	iyPemLugu1	8967	2.8568e-05	4186	4781	0.88	10572	3.3681e-05	7231	2.3037e-05	17803	5.6718e-05	0.68
iyRhoChlo1	iyRhoChlo1	1027798	0.0040263	667452	360346	1.85	83428	0.000326821	83855	0.000328494	167283	0.000655315	1.01
iyStePhae1	iyStePhae1	982157	0.00401052	646179	335978	1.92	67838	0.000277008	70732	0.000288826	138570	0.000565834	1.04
iyTenMeso1	iyTenMeso1	764080	0.00197544	462999	301081	1.54	136475	0.00035284	134427	0.000347545	270902	0.000700385	0.98
iyTenNoth1	iyTenNoth1	1121070	0.00443817	701805	419265	1.67	165827	0.000656488	167206	0.000661947	333033	0.00131843	1.01
iyTipFemo1	iyTipFemo1	812452	0.00297952	532390	280062	1.9	57708	0.000211634	58676	0.000215184	116384	0.000426817	1.02
iyVesCrab1	iyVesCrab1	137719	0.000631907	73181	64538	1.13	75655	0.000347134	68884	0.000316066	144539	0.0006632	0.91
iyVesGerm1	iyVesGerm1	259183	0.00127804	185141	74042	2.5	90028	0.000443931	90262	0.000445085	180290	0.000889017	1
iyVesVulg1	iyVesVulg2	3562338	0.0190322	2571786	990552	2.6	363071	0.00193975	372387	0.00198952	735458	0.00392928	1.03
iyVesVulg1	iyVesVulg3	3533129	0.0188762	2554519	978610	2.61	360569	0.00192638	369033	0.0019716	729602	0.00389799	1.02
iyVesVulg1	iyVesVulg5	396547	0.0021186	279785	116762	2.4	119476	0.000638315	118723	0.000634292	238199	0.00127261	0.99
iyVesVulg1	iyVesVulg1	261756	0.00139846	189807	71949	2.64	105763	0.000565052	103987	0.000555563	209750	0.00112061	0.98
jaDiaLine6	jaDiaLine6	2022384	0.00674469	1052633	969751	1.09	198585	0.000662284	214956	0.000716882	413541	0.00137917	1.08
jaMetSeni4	jaMetSeni4	852640	0.00222913	441090	411550	1.07	107283	0.000280479	110206	0.000288121	217489	0.0005686	1.03
jaNemVect1	jaNemVect1	883178	0.00328823	483952	399226	1.21	92022	0.000342614	83896	0.000312359	175918	0.000654974	0.91
jhCanCock6	jhCanCock6	30766	0.000132151	17983	12783	1.41	5162	2.2173e-05	2945	1.265e-05	8107	3.4823e-05	0.57
jrHalOcto1	jrHalOcto1	992370	0.00385548	554576	437794	1.27	68339	0.000265505	73440	0.000285323	141779	0.000550828	1.07
kaAplTurb1	kaAplTurb1	1777650	0.00293625	1134450	643200	1.76	142047	0.000234627	148218	0.00024482	290265	0.000479447	1.04
kaAscMent1	kaAscMent1	2274930	0.011836	1273975	1000955	1.27	133361	0.000693848	142344	0.000740585	275705	0.00143443	1.07
kaClaLepa1	kaClaLepa1	1232115	0.00594623	716657	515458	1.39	59794	0.000288568	63743	0.000307626	123537	0.000596194	1.07
kcLamFluv1	kcLamFluv1	3515425	0.00359718	1925098	1590327	1.21	539222	0.000551762	485671	0.000496966	1024893	0.00104873	0.9
laTriPals1	laTriPals1	2123680	0.0048726	1404100	719580	1.95	118675	0.00027229	122318	0.000280648	240993	0.000552938	1.03
lpBroSter1	lpBroSter1	5710	2.138e-06	3177	2533	1.25	37889	1.4188e-05	18201	6.815e-06	56090	2.1003e-05	0.48
lpCarAren1	lpCarAren1	603161	0.00171487	374930	228231	1.64	67788	0.000192731	67578	0.000192134	135366	0.000384864	1
lpCarDepa1	lpCarDepa1	18421	2.6321e-05	11185	7236	1.55	7428	1.0614e-05	3220	4.601e-06	10648	1.5215e-05	0.43
lpCarDivu1	lpCarDivu1	795	2.048e-06	444	351	1.26	3421	8.815e-06	1404	3.618e-06	4825	1.2432e-05	0.41
lpCarPend1	lpCarPend1	748	2.065e-06	379	369	1.03	3522	9.723e-06	4280	1.1816e-05	7802	2.1539e-05	1.22
lpCarRost1	lpCarRost1	2131821	0.00566929	1327136	804685	1.65	232214	0.000617542	238252	0.000633599	470466	0.00125114	1.03
lpCarSylv1	lpCarSylv1	292610	0.00080732	198178	94432	2.1	28565	7.8812e-05	26233	7.2378e-05	54798	0.000151189	0.92
lpJunEffu1	lpJunEffu1	5559	2.3262e-05	3369	2190	1.54	2672	1.1181e-05	3331	1.3939e-05	6003	2.512e-05	1.25
lpLuzSylv1	lpLuzSylv1	1131579	0.00262748	611332	520247	1.18	113754	0.000264132	115186	0.000267457	228940	0.000531589	1.01
lpPhrAust1	lpPhrAust1	8584348	0.0101187	6397906	2186442	2.93	376599	0.000443912	389214	0.000458782	765813	0.000902694	1.03
lpSchLacu1	lpSchLacu1	5215395	0.0108673	3179017	2036378	1.56	523134	0.00109005	530239	0.00110486	1053373	0.00219491	1.01
lpSchTriq1	lpSchTriq1	132202	0.000230713	81757	50445	1.62	16455	2.8717e-05	15454	2.697e-05	31909	5.5686e-05	0.94
mCanLor1	mCanLor1	2891810	0.00126473	1910210	981600	1.95	487236	0.000213093	461620	0.00020189	948856	0.000414983	0.95
mCerEla1	mCerEla1	6614925	0.00255219	4542104	2072821	2.19	458932	0.000177066	448499	0.000173041	907431	0.000350107	0.98
mDelDel1	mDelDel1	4240736	0.00189843	2918293	1322443	2.21	353045	0.000158046	345716	0.000154765	698761	0.000312811	0.98
mEptNil1	mEptNil1	16919078	0.00893982	10819743	6099335	1.77	1370481	0.000724144	1369538	0.000723646	2740019	0.00144779	1
mGloMel1	mGloMel1	1698248	0.000761061	1133699	564549	2.01	169894	7.6137e-05	164368	7.3661e-05	334262	0.000149798	0.97
mHypAmp2	mHypAmp2	1025552	0.000447218	638110	387442	1.65	121786	5.3108e-05	111598	4.8665e-05	233384	0.000101773	0.92
mLagAlb1	mLagAlb1	705055	0.000310424	457503	247552	1.85	95593	4.2088e-05	89169	3.926e-05	184762	8.1348e-05	0.93
mMarMar1	mMarMar1	1057610	0.000461075	720733	336877	2.14	191093	8.3309e-05	175353	7.6447e-05	366446	0.000159756	0.92
mMelMel3	mMelMel3	814252	0.000335311	542881	271371	2	188545	7.7643e-05	146373	6.0277e-05	334918	0.00013792	0.78
mMusMuc1	mMusMuc1	45134	1.8063e-05	19870	25264	0.79	61438	2.4588e-05	74702	2.9897e-05	136140	5.4485e-05	1.22
mOrcOrc1	mOrcOrc1	1362753	0.000579961	846918	515835	1.64	130147	5.5388e-05	125425	5.3378e-05	255572	0.000108766	0.96
mPipPyg2	mPipPyg2	12331253	0.00709857	7968010	4363243	1.83	1184086	0.000681627	1180220	0.000679401	2364306	0.00136103	1
mPleAur1	mPleAur1	11227866	0.00557633	7480672	3747194	2	955251	0.000474426	951333	0.00047248	1906584	0.000946907	1
mSteCoe1	mSteCoe1	9161668	0.0040233	6266377	2895291	2.16	630987	0.000277095	625718	0.000274781	1256705	0.000551875	0.99
paTetJugo1	paTetJugo1	459597	0.0175977	284727	174870	1.63	33751	0.00129231	39252	0.00150293	73003	0.00279524	1.16
pxEimPrae1	pxEimPrae1	476725	0.00742137	261780	214945	1.22	50519	0.00078645	52145	0.000811763	102664	0.00159821	1.03
qcStrAcum1	qcStrAcum1	319386	0.00156225	188030	131356	1.43	30948	0.00015138	32560	0.000159265	63508	0.000310645	1.05
qhLepNord3	qhLepNord3	4374120	0.0129471	2392967	1981153	1.21	420894	0.00124582	427620	0.00126572	848514	0.00251154	1.02
qqAmaFero1	qqAmaFero1	12010314	0.00400557	6867875	5142439	1.34	882878	0.000294449	898332	0.000299604	1781210	0.000594053	1.02
qqArgBrue1	qqArgBrue1	8343981	0.00556005	4567548	3776433	1.21	715275	0.000476627	727963	0.000485081	1443238	0.000961708	1.02
qqMetBour1	qqMetBour1	254831	0.000221273	142576	112255	1.27	38359	3.3308e-05	40509	3.5174e-05	78868	6.8482e-05	1.06
qqOdiSpin1	qqOdiSpin1	579710	0.00159201	268689	311021	0.86	74187	0.000203733	74669	0.000205057	148856	0.00040879	1.01
qqParLuna2	qqParLuna2	4850530	0.00410484	2491351	2359179	1.06	504141	0.000426637	496390	0.000420078	1000531	0.000846716	0.98
qqTetMont2	qqTetMont2	5134449	0.007743	2632745	2501704	1.05	685874	0.00103433	717290	0.00108171	1403164	0.00211604	1.05
qxSacCarc1	qxSacCarc1	3067337	0.0116776	1586016	1481321	1.07	202745	0.000771868	217144	0.000826686	419889	0.00159855	1.07
rZooViv1	rZooViv1	5219101	0.0037878	3238448	1980653	1.64	571623	0.000414859	571330	0.000414646	1142953	0.000829505	1
sRajBra1	sRajBra1	5419447	0.00212093	3269942	2149505	1.52	460353	0.000180161	406797	0.000159202	867150	0.000339363	0.88
tnLinLong1	tnLinLong1	3635201	0.00931077	2015304	1619897	1.24	242007	0.000619848	257306	0.000659033	499313	0.00127888	1.06
tzBugNeri2	tzBugNeri2	2397086	0.011971	1581863	815223	1.94	132931	0.000663855	146309	0.000730664	279240	0.00139452	1.1
tzBugStol2	tzBugStol2	1951401	0.00831681	1334641	616760	2.16	116006	0.000494414	126819	0.000540499	242825	0.00103491	1.09
tzCryPall5	tzCryPall5	6017397	0.0107365	3758593	2258804	1.66	280312	0.000500144	294604	0.000525644	574916	0.00102579	1.05
tzMemMemb1	tzMemMemb1	3012623	0.0088814	1619964	1392659	1.16	194529	0.000573484	199999	0.00058961	394528	0.00116309	1.03
tzWatSuba1	tzWatSuba1	7217632	0.00980984	4640423	2577209	1.8	309539	0.00042071	341307	0.000463887	650846	0.000884597	1.1
ucDunPrim2	ucDunPrim2	2906	1.5077e-05	1892	1014	1.87	10698	5.5504e-05	9830	5.1e-05	20528	0.000106504	0.92
ucMarCocc1	ucMarCocc1	50	2.241e-06	13	37	0.35	476	2.133e-05	81	3.63e-06	557	2.496e-05	0.17
ucPycProv1	ucPycProv1	172770	0.00536059	90917	81853	1.11	22182	0.000688248	23825	0.000739226	46007	0.00142748	1.07
wcApoIcte1	wcApoIcte1	5354145	0.00483209	2954898	2399247	1.23	509916	0.000460197	548678	0.000495179	1058594	0.000955376	1.08
wcLumRube1	wcLumRube1	3878242	0.00499911	2211112	1667130	1.33	404786	0.000521775	429491	0.00055362	834277	0.0010754	1.06
wcLumTerr1	wcLumTerr1	5879503	0.00564155	3431687	2447816	1.4	577852	0.000554466	629491	0.000604015	1207343	0.00115848	1.09
wdMagJohn1	wdMagJohn1	8097929	0.00943388	4211580	3886349	1.08	548806	0.000639345	576785	0.00067194	1125591	0.00131128	1.05
wkErpOcto2	wkErpOcto2	1868137	0.00489981	1025424	842713	1.22	215501	0.000565223	224943	0.000589988	440444	0.00115521	1.04
wpAchSqua1	wpAchSqua1	9297245	0.00628765	5223570	4073675	1.28	810619	0.000548215	870536	0.000588736	1681155	0.00113695	1.07
wpAleGela1	wpAleGela1	12336246	0.0100353	6708544	5627702	1.19	739078	0.000601224	790437	0.000643003	1529515	0.00124423	1.07
wpAliVire1	wpAliVire1	1421887	0.00211911	729450	692437	1.05	149125	0.000222248	140585	0.000209521	289710	0.000431769	0.94
wpHarImpa5	wpHarImpa5	12328838	0.00841877	6859730	5469108	1.25	860582	0.00058765	879317	0.000600443	1739899	0.00118809	1.02
wpSthLimi1	wpSthLimi1	6559857	0.00582287	3560240	2999617	1.19	639706	0.000567836	651598	0.000578392	1291304	0.00114623	1.02
wrPisGeom1	wrPisGeom1	1179073	0.00717301	620899	558174	1.11	100083	0.000608865	103856	0.000631819	203939	0.00124068	1.04
wtTerLapi1	wtTerLapi1	2767673	0.00372644	1579107	1188566	1.33	215835	0.000290604	213331	0.000287233	429166	0.000577837	0.99
xbArcSenh1	xbArcSenh1	3834768	0.00408792	1870592	1964176	0.95	354255	0.000377641	375103	0.000399865	729358	0.000777506	1.06
xbAzoCham1	xbAzoCham1	14477568	0.00845617	7406357	7071211	1.05	1115100	0.000651316	1189588	0.000694824	2304688	0.00134614	1.07
xbCerEdul1	xbCerEdul1	10704872	0.0130348	5473861	5231011	1.05	578072	0.000703892	620225	0.00075522	1198297	0.00145911	1.07
xbGarTell2	xbGarTell2	11682227	0.00732287	5410514	6271713	0.86	938675	0.000588398	1018104	0.000638187	1956779	0.00122659	1.08
xbLutLutr1	xbLutLutr1	6943438	0.00956411	3580202	3363236	1.06	556616	0.0007667	589952	0.000812618	1146568	0.00157932	1.06
xbMagGiga1	xbMagGiga1	5177220	0.0091927	2606143	2571077	1.01	458765	0.000814586	462209	0.000820701	920974	0.00163529	1.01
xbMimVari1	xbMimVari1	10941984	0.0112445	5580477	5361507	1.04	679938	0.000698736	728875	0.000749026	1408813	0.00144776	1.07
xbMytEdul2	xbMytEdul2	9614323	0.00737927	4585487	5028836	0.91	852587	0.000654385	883458	0.000678079	1736045	0.00133246	1.04
xbOstEdul1	xbOstEdul1	3713255	0.00415843	2125584	1587671	1.34	357881	0.000400787	362048	0.000405453	719929	0.00080624	1.01
xbSpiSubt1	xbSpiSubt1	7614962	0.00824168	3688537	3926425	0.94	446823	0.000483597	476375	0.000515581	923198	0.000999177	1.07
xgAniVort1	xgAniVort1	6151294	0.00734795	2709632	3441662	0.79	659712	0.000788051	656263	0.000783931	1315975	0.00157198	0.99
xgGibMagu1	xgGibMagu1	11527491	0.00787757	5079513	6447978	0.79	796578	0.00054436	850309	0.000581078	1646887	0.00112544	1.07
xgOncCelt3	xgOncCelt3	89089	7.8144e-05	43529	45560	0.96	132909	0.00011658	76406	6.7019e-05	209315	0.000183599	0.57
xgPatDepr1	xgPatDepr1	5377374	0.00822771	2848620	2528754	1.13	498811	0.000763211	513575	0.000785801	1012386	0.00154901	1.03
xgPatPell1	xgPatPell1	5415392	0.00763695	2679409	2735983	0.98	467796	0.0006597	493680	0.000696203	961476	0.0013559	1.06
xgPatUlys2	xgPatUlys2	5304803	0.00766564	2826288	2478515	1.14	453999	0.000656046	482572	0.000697335	936571	0.00135338	1.06
xgPatVulg1	xgPatVulg1	3736800	0.0053811	1924693	1812107	1.06	351225	0.000505774	368161	0.000530162	719386	0.00103594	1.05
xgPhoLine1	PHORD0020b	10507458	0.0109945	5032293	5475165	0.92	738885	0.000773133	733972	0.000767992	1472857	0.00154112	0.99
xgPhoLine1	PHORD0021b	10537997	0.0110264	5047949	5490048	0.92	739709	0.000773995	734603	0.000768652	1474312	0.00154265	0.99
xgPhoLine1	PHORD0022b	10475893	0.0109615	5018504	5457389	0.92	738563	0.000772796	731255	0.000765149	1469818	0.00153794	0.99
xgPhoLine1	PHORD0023b	10629007	0.0111217	5086537	5542470	0.92	745264	0.000779808	735827	0.000769933	1481091	0.00154974	0.99
xgPhoLine1	PHORD0024b	10638489	0.0111316	5093725	5544764	0.92	745107	0.000779643	739355	0.000773625	1484462	0.00155327	0.99
xgPhoLine1	PHORD0030b	10671657	0.0111663	5105700	5565957	0.92	748414	0.000783104	743467	0.000777927	1491881	0.00156103	0.99
xgPhoLine1	PHORD0031b	10598647	0.0110899	5072447	5526200	0.92	746031	0.00078061	741555	0.000775927	1487586	0.00155654	0.99
xgPhoLine1	PHORD0033b	10183262	0.0106553	4882998	5300264	0.92	714543	0.000747663	706862	0.000739626	1421405	0.00148729	0.99
xgPhoLine1	PHORD0034b	10541949	0.0110306	5047295	5494654	0.92	740325	0.00077464	733145	0.000767127	1473470	0.00154177	0.99
xgPhoLine1	PHORD0038b	10824758	0.0113265	5180025	5644733	0.92	758258	0.000793404	753722	0.000788658	1511980	0.00158206	0.99
xgPhoLine1	PHORD0051b	10698669	0.0111946	5117279	5581390	0.92	750326	0.000785104	743945	0.000778427	1494271	0.00156353	0.99
xgPhoLine1	PHORD0053b	10329356	0.0108081	4948856	5380500	0.92	726520	0.000760195	719328	0.000752669	1445848	0.00151286	0.99
xgPhoLine1	PHORD0054b	10116296	0.0105852	4854596	5261700	0.92	708584	0.000741427	698231	0.000730595	1406815	0.00147202	0.99
xgPhoLine1	PHORD0058b	10700301	0.0111963	5118883	5581418	0.92	751620	0.000786458	746734	0.000781346	1498354	0.0015678	0.99
xgPhoLine1	PHORD0060b	10402349	0.0108845	4986179	5416170	0.92	730375	0.000764228	721423	0.000754862	1451798	0.00151909	0.99
xgPhoLine1	xgPhoLine1	5771804	0.00603933	2786574	2985230	0.93	407179	0.000426052	432219	0.000452253	839398	0.000878305	1.06
xgPhoLine1	xgPhoLine2	10320003	0.0107983	4948190	5371813	0.92	727242	0.00076095	711072	0.000744031	1438314	0.00150498	0.98
xgSteCine2	xgSteCine2	11025073	0.00875986	4901128	6123945	0.8	734706	0.000583753	786119	0.000624603	1520825	0.00120836	1.07
xpLepCine2	xpLepCine2	5584059	0.00795002	2860249	2723810	1.05	386370	0.000550075	426587	0.000607332	812957	0.00115741	1.1

## Sheet: Table 7
Supplementary Table 7. NCBI taxonomic classifications
Sample	Domain	Kingdom	Phylum	Class	Order	Family	Genus	Species
bAccGen1	Eukaryota	Metazoa	Chordata	Aves	Accipitriformes	Accipitridae	Accipiter	Accipiter gentilis
bAnaAcu1	Eukaryota	Metazoa	Chordata	Aves	Anseriformes	Anatidae	Anas	Anas acuta
bAnsBra1	Eukaryota	Metazoa	Chordata	Aves	Anseriformes	Anatidae	Anser	Anser brachyrhynchus
bCinCin1	Eukaryota	Metazoa	Chordata	Aves	Passeriformes	Cinclidae	Cinclus	Cinclus cinclus
bClaHye2	Eukaryota	Metazoa	Chordata	Aves	Anseriformes	Anatidae	Clangula	Clangula hyemalis
bFriCoe1	Eukaryota	Metazoa	Chordata	Aves	Passeriformes	Fringillidae	Fringilla	Fringilla coelebs
bLarFus1	Eukaryota	Metazoa	Chordata	Aves	Charadriiformes	Laridae	Larus	Larus fuscus
bPhaCar2	Eukaryota	Metazoa	Chordata	Aves	Suliformes	Phalacrocoracidae	Phalacrocorax	Phalacrocorax carbo
bTetUro1	Eukaryota	Metazoa	Chordata	Aves	Galliformes	Phasianidae	Tetrao	Tetrao urogallus
cbCliDend2	Eukaryota	Viridiplantae	Streptophyta	Bryopsida	Hypnales	Climaciaceae	Climacium	Climacium dendroides
cbIsoMyos1	Eukaryota	Viridiplantae	Streptophyta	Bryopsida	Hypnales	Lembophyllaceae	Isothecium	Isothecium myosuroides
cbNecPumi1	Eukaryota	Viridiplantae	Streptophyta	Bryopsida	Hypnales	Neckeraceae	Neckera	Neckera pumila
cbPolComm4	Eukaryota	Viridiplantae	Streptophyta	Polytrichopsida	Polytrichales	Polytrichaceae	Polytrichum	Polytrichum commune
cbPsePuru1	Eukaryota	Viridiplantae	Streptophyta	Bryopsida	Hypnales	Brachytheciaceae	Pseudoscleropodium	Pseudoscleropodium purum
cbRhyLore1	Eukaryota	Viridiplantae	Streptophyta	Bryopsida	Hypnales	Hylocomiaceae	Rhytidiadelphus	Rhytidiadelphus loreus
cbThuTama2	Eukaryota	Viridiplantae	Streptophyta	Bryopsida	Hypnales	Thuidiaceae	Thuidium	Thuidium tamariscinum
cmLunCruc20	Eukaryota	Viridiplantae	Streptophyta	Marchantiopsida	Lunulariales	Lunulariaceae	Lunularia	Lunularia cruciata
daAjuCham1	Eukaryota	Viridiplantae	Streptophyta	Magnoliopsida	Lamiales	Lamiaceae	Ajuga	Ajuga chamaepitys
daArcMinu1	Eukaryota	Viridiplantae	Streptophyta	Magnoliopsida	Asterales	Asteraceae	Arctium	Arctium minus
daBalNigr1	Eukaryota	Viridiplantae	Streptophyta	Magnoliopsida	Lamiales	Lamiaceae	Ballota	Ballota nigra
daCalOffi1	Eukaryota	Viridiplantae	Streptophyta	Magnoliopsida	Asterales	Asteraceae	Calendula	Calendula officinalis
daCruLaev1	Eukaryota	Viridiplantae	Streptophyta	Magnoliopsida	Gentianales	Rubiaceae	Cruciata	Cruciata laevipes
daEupConf1	Eukaryota	Viridiplantae	Streptophyta	Magnoliopsida	Lamiales	Orobanchaceae	Euphrasia	Euphrasia confusa
daGnaUlig1	Eukaryota	Viridiplantae	Streptophyta	Magnoliopsida	Asterales	Asteraceae	Gnaphalium	Gnaphalium uliginosum
daLigVulg1	Eukaryota	Viridiplantae	Streptophyta	Magnoliopsida	Lamiales	Oleaceae	Ligustrum	Ligustrum vulgare
daLinVulg1	Eukaryota	Viridiplantae	Streptophyta	Magnoliopsida	Lamiales	Plantaginaceae	Linaria	Linaria vulgaris
daLogMini1	Eukaryota	Viridiplantae	Streptophyta	Magnoliopsida	Asterales	Asteraceae	Logfia	Logfia minima
daMisOron1	Eukaryota	Viridiplantae	Streptophyta	Magnoliopsida	Lamiales	Plantaginaceae	Misopates	Misopates orontium
daPseLute1	Eukaryota	Viridiplantae	Streptophyta	Magnoliopsida	Asterales	Asteraceae	Pseudognaphalium	Pseudognaphalium luteoalbum
daPulDyse1	Eukaryota	Viridiplantae	Streptophyta	Magnoliopsida	Asterales	Asteraceae	Pulicaria	Pulicaria dysenterica
daScuGale1	Eukaryota	Viridiplantae	Streptophyta	Magnoliopsida	Lamiales	Lamiaceae	Scutellaria	Scutellaria galericulata
daScuMino1	Eukaryota	Viridiplantae	Streptophyta	Magnoliopsida	Lamiales	Lamiaceae	Scutellaria	Scutellaria minor
daSheArve1	Eukaryota	Viridiplantae	Streptophyta	Magnoliopsida	Gentianales	Rubiaceae	Sherardia	Sherardia arvensis
daSolDulc1	Eukaryota	Viridiplantae	Streptophyta	Magnoliopsida	Solanales	Solanaceae	Solanum	Solanum dulcamara
daVerOffi1	Eukaryota	Viridiplantae	Streptophyta	Magnoliopsida	Lamiales	Verbenaceae	Verbena	Verbena officinalis
dcAgrGith1	Eukaryota	Viridiplantae	Streptophyta	Magnoliopsida	Caryophyllales	Caryophyllaceae	Agrostemma	Agrostemma githago
dcCheAlbu1	Eukaryota	Viridiplantae	Streptophyta	Magnoliopsida	Caryophyllales	Chenopodiaceae	Chenopodium	Chenopodium album
dcFalConv1	Eukaryota	Viridiplantae	Streptophyta	Magnoliopsida	Caryophyllales	Polygonaceae	Fallopia	Fallopia convolvulus
dcPerMacu1	Eukaryota	Viridiplantae	Streptophyta	Magnoliopsida	Caryophyllales	Polygonaceae	Persicaria	Persicaria maculosa
dcPolAvic1	Eukaryota	Viridiplantae	Streptophyta	Magnoliopsida	Caryophyllales	Polygonaceae	Polygonum	Polygonum aviculare
dcSalRamo1	Eukaryota	Viridiplantae	Streptophyta	Magnoliopsida	Caryophyllales	Chenopodiaceae	Salicornia	Salicornia ramosissima
dcSpeBocc1	Eukaryota	Viridiplantae	Streptophyta	Magnoliopsida	Caryophyllales	Caryophyllaceae	Spergularia	Spergularia bocconei
dcSpeMari1	Eukaryota	Viridiplantae	Streptophyta	Magnoliopsida	Caryophyllales	Caryophyllaceae	Spergularia	Spergularia marina
ddAraThal4	Eukaryota	Viridiplantae	Streptophyta	Magnoliopsida	Brassicales	Brassicaceae	Arabidopsis	Arabidopsis thaliana
ddBarVulg1	Eukaryota	Viridiplantae	Streptophyta	Magnoliopsida	Brassicales	Brassicaceae	Barbarea	Barbarea vulgaris
ddEupLath1	Eukaryota	Viridiplantae	Streptophyta	Magnoliopsida	Malpighiales	Euphorbiaceae	Euphorbia	Euphorbia lathyris
ddEupPepu3	Eukaryota	Viridiplantae	Streptophyta	Magnoliopsida	Malpighiales	Euphorbiaceae	Euphorbia	Euphorbia peplus
ddHibTrid2	Eukaryota	Viridiplantae	Streptophyta	Magnoliopsida	Malvales	Malvaceae	Hibiscus	Hibiscus tridactylites
ddLepDidy1	Eukaryota	Viridiplantae	Streptophyta	Magnoliopsida	Brassicales	Brassicaceae	Lepidium	Lepidium didymum
ddPopNigr1	Eukaryota	Viridiplantae	Streptophyta	Magnoliopsida	Malpighiales	Salicaceae	Populus	Populus nigra
ddPriVeri1	Eukaryota	Viridiplantae	Streptophyta	Magnoliopsida	Ericales	Primulaceae	Primula	Primula veris
ddSalCapr1	Eukaryota	Viridiplantae	Streptophyta	Magnoliopsida	Malpighiales	Salicaceae	Salix	Salix caprea
ddSamVale1	Eukaryota	Viridiplantae	Streptophyta	Magnoliopsida	Ericales	Primulaceae	Samolus	Samolus valerandi
ddVioOdor1	Eukaryota	Viridiplantae	Streptophyta	Magnoliopsida	Malpighiales	Violaceae	Viola	Viola odorata
dhAlnGlut1	Eukaryota	Viridiplantae	Streptophyta	Magnoliopsida	Fagales	Betulaceae	Alnus	Alnus glutinosa
dhMyrGale1	Eukaryota	Viridiplantae	Streptophyta	Magnoliopsida	Fagales	Myricaceae	Myrica	Myrica gale
dhQueCerr2	Eukaryota	Viridiplantae	Streptophyta	Magnoliopsida	Fagales	Fagaceae	Quercus	Quercus cerris
dmBerVulg1	Eukaryota	Viridiplantae	Streptophyta	Magnoliopsida	Ranunculales	Berberidaceae	Berberis	Berberis vulgaris
drAceCamp1	Eukaryota	Viridiplantae	Streptophyta	Magnoliopsida	Sapindales	Sapindaceae	Acer	Acer campestre
drAilAlti1	Eukaryota	Viridiplantae	Streptophyta	Magnoliopsida	Sapindales	Simaroubaceae	Ailanthus	Ailanthus altissima
drAstGlyc1	Eukaryota	Viridiplantae	Streptophyta	Magnoliopsida	Fabales	Fabaceae	Astragalus	Astragalus glycyphyllos
drBuxSemp1	Eukaryota	Viridiplantae	Streptophyta	Magnoliopsida	Buxales	Buxaceae	Buxus	Buxus sempervirens
drChaAngu1	Eukaryota	Viridiplantae	Streptophyta	Magnoliopsida	Myrtales	Onagraceae	Chamaenerion	Chamaenerion angustifolium
drCraLaev2	Eukaryota	Viridiplantae	Streptophyta	Magnoliopsida	Rosales	Rosaceae	Crataegus	Crataegus laevigata
drEroMari8	Eukaryota	Viridiplantae	Streptophyta	Magnoliopsida	Geraniales	Geraniaceae	Erodium	Erodium maritimum
drEuoEuro1	Eukaryota	Viridiplantae	Streptophyta	Magnoliopsida	Celastrales	Celastraceae	Euonymus	Euonymus europaeus
drFilUlma1	Eukaryota	Viridiplantae	Streptophyta	Magnoliopsida	Rosales	Rosaceae	Filipendula	Filipendula ulmaria
drGeuUrba1	Eukaryota	Viridiplantae	Streptophyta	Magnoliopsida	Rosales	Rosaceae	Geum	Geum urbanum
drHedHeli1	Eukaryota	Viridiplantae	Streptophyta	Magnoliopsida	Apiales	Araliaceae	Hedera	Hedera helix
drHumLupu1	Eukaryota	Viridiplantae	Streptophyta	Magnoliopsida	Rosales	Cannabaceae	Humulus	Humulus lupulus
drIleAqui2	Eukaryota	Viridiplantae	Streptophyta	Magnoliopsida	Aquifoliales	Aquifoliaceae	Ilex	Ilex aquifolium
drMalDome5	Eukaryota	Viridiplantae	Streptophyta	Magnoliopsida	Rosales	Rosaceae	Malus	Malus domestica
drMalDome10	Eukaryota	Viridiplantae	Streptophyta	Magnoliopsida	Rosales	Rosaceae	Malus	Malus domestica
drMalDome11	Eukaryota	Viridiplantae	Streptophyta	Magnoliopsida	Rosales	Rosaceae	Malus	Malus domestica
drMalDome58	Eukaryota	Viridiplantae	Streptophyta	Magnoliopsida	Rosales	Rosaceae	Malus	Malus domestica
drMalRobu1	Eukaryota	Viridiplantae	Streptophyta	Magnoliopsida	Rosales	Rosaceae	Malus	Malus x robusta
drMalSylv7	Eukaryota	Viridiplantae	Streptophyta	Magnoliopsida	Rosales	Rosaceae	Malus	Malus sylvestris
drMedArab1	Eukaryota	Viridiplantae	Streptophyta	Magnoliopsida	Fabales	Fabaceae	Medicago	Medicago arabica
drMedLupu1	Eukaryota	Viridiplantae	Streptophyta	Magnoliopsida	Fabales	Fabaceae	Medicago	Medicago lupulina
drParJuda1	Eukaryota	Viridiplantae	Streptophyta	Magnoliopsida	Rosales	Urticaceae	Parietaria	Parietaria judaica
drPotAnse1	Eukaryota	Viridiplantae	Streptophyta	Magnoliopsida	Rosales	Rosaceae	Potentilla	Potentilla anserina
drPotSter1	Eukaryota	Viridiplantae	Streptophyta	Magnoliopsida	Rosales	Rosaceae	Potentilla	Potentilla sterilis
drPruPadu1	Eukaryota	Viridiplantae	Streptophyta	Magnoliopsida	Rosales	Rosaceae	Prunus	Prunus padus
drPyrComm1	Eukaryota	Viridiplantae	Streptophyta	Magnoliopsida	Rosales	Rosaceae	Pyrus	Pyrus communis
drTriDubi3	Eukaryota	Viridiplantae	Streptophyta	Magnoliopsida	Fabales	Fabaceae	Trifolium	Trifolium dubium
drTriFrag1	Eukaryota	Viridiplantae	Streptophyta	Magnoliopsida	Fabales	Fabaceae	Trifolium	Trifolium fragiferum
drTriSubt1	Eukaryota	Viridiplantae	Streptophyta	Magnoliopsida	Fabales	Fabaceae	Trifolium	Trifolium subterraneum
drUmbRupe1	Eukaryota	Viridiplantae	Streptophyta	Magnoliopsida	Saxifragales	Crassulaceae	Umbilicus	Umbilicus rupestris
drUrtDioi1	Eukaryota	Viridiplantae	Streptophyta	Magnoliopsida	Rosales	Urticaceae	Urtica	Urtica dioica
drUrtUren1	Eukaryota	Viridiplantae	Streptophyta	Magnoliopsida	Rosales	Urticaceae	Urtica	Urtica urens
eaLuiSars1	Eukaryota	Metazoa	Echinodermata	Asteroidea	Paxillosida	Luidiidae	Luidia	Luidia sarsii
eaMarGlac1	Eukaryota	Metazoa	Echinodermata	Asteroidea	Forcipulatida	Asteriidae	Marthasterias	Marthasterias glacialis
ecAntBifi1	Eukaryota	Metazoa	Echinodermata	Crinoidea	Comatulida	Antedonidae	Antedon	Antedon bifida
fAbrBra2	Eukaryota	Metazoa	Chordata	Actinopteri	Cypriniformes	Cyprinidae	Abramis	Abramis brama
fAciRut3	Eukaryota	Metazoa	Chordata	Actinopteri	Acipenseriformes	Acipenseridae	Acipenser	Acipenser ruthenus
fBarBab1	Eukaryota	Metazoa	Chordata	Actinopteri	Cypriniformes	Cyprinidae	Barbus	Barbus barbus
fBarBar1	Eukaryota	Metazoa	Chordata	Actinopteri	Cypriniformes	Nemacheilidae	Barbatula	Barbatula barbatula
fBleOce1	Eukaryota	Metazoa	Chordata	Actinopteri	Blenniiformes	Blenniidae	Blennius	Blennius ocellaris
fCarCar2	Eukaryota	Metazoa	Chordata	Actinopteri	Cypriniformes	Cyprinidae	Carassius	Carassius carassius
fCheLab1	Eukaryota	Metazoa	Chordata	Actinopteri	Mugiliformes	Mugilidae	Chelon	Chelon labrosus
fConCon1	Eukaryota	Metazoa	Chordata	Actinopteri	Anguilliformes	Congridae	Conger	Conger conger
fCycLum2	Eukaryota	Metazoa	Chordata	Actinopteri	Perciformes	Cyclopteridae	Cyclopterus	Cyclopterus lumpus
fDanRer4	Eukaryota	Metazoa	Chordata	Actinopteri	Cypriniformes	Cyprinidae	Danio	Danio rerio
fEchVip8	Eukaryota	Metazoa	Chordata	Actinopteri	Perciformes	Trachinidae	Echiichthys	Echiichthys vipera
fEutGur1	Eukaryota	Metazoa	Chordata	Actinopteri	Perciformes	Triglidae	Eutrigla	Eutrigla gurnardus
fGobGob1	Eukaryota	Metazoa	Chordata	Actinopteri	Cypriniformes	Cyprinidae	Gobio	Gobio gobio
fGobNig1	Eukaryota	Metazoa	Chordata	Actinopteri	Gobiiformes	Gobiidae	Gobius	Gobius niger
fHypImm3	Eukaryota	Metazoa	Chordata	Actinopteri	Uranoscopiformes	Ammodytidae	Hyperoplus	Hyperoplus immaculatus
fLabBer1	Eukaryota	Metazoa	Chordata	Actinopteri	Labriformes	Labridae	Labrus	Labrus bergylta
fLabMix1	Eukaryota	Metazoa	Chordata	Actinopteri	Labriformes	Labridae	Labrus	Labrus mixtus
fLipPho2	Eukaryota	Metazoa	Chordata	Actinopteri	Blenniiformes	Blenniidae	Lipophrys	Lipophrys pholis
fMicPou1	Eukaryota	Metazoa	Chordata	Actinopteri	Gadiformes	Gadidae	Micromesistius	Micromesistius poutassou
fMicVar1	Eukaryota	Metazoa	Chordata	Actinopteri	Pleuronectiformes	Soleidae	Microchirus	Microchirus variegatus
fPhoGun1	Eukaryota	Metazoa	Chordata	Actinopteri	Perciformes	Pholidae	Pholis	Pholis gunnellus
fPhoPho1	Eukaryota	Metazoa	Chordata	Actinopteri	Cypriniformes	Cyprinidae	Phoxinus	Phoxinus phoxinus
fPlaFle2	Eukaryota	Metazoa	Chordata	Actinopteri	Pleuronectiformes	Pleuronectidae	Platichthys	Platichthys flesus
fPlePla1	Eukaryota	Metazoa	Chordata	Actinopteri	Pleuronectiformes	Pleuronectidae	Pleuronectes	Pleuronectes platessa
fPolPol2	Eukaryota	Metazoa	Chordata	Actinopteri	Gadiformes	Gadidae	Pollachius	Pollachius pollachius
fPunPun2	Eukaryota	Metazoa	Chordata	Actinopteri	Perciformes	Gasterosteidae	Pungitius	Pungitius pungitius
fRutRut2	Eukaryota	Metazoa	Chordata	Actinopteri	Cypriniformes	Cyprinidae	Rutilus	Rutilus rutilus
fSalTru1	Eukaryota	Metazoa	Chordata	Actinopteri	Salmoniformes	Salmonidae	Salmo	Salmo trutta
fScoMax1	Eukaryota	Metazoa	Chordata	Actinopteri	Pleuronectiformes	Scophthalmidae	Scophthalmus	Scophthalmus maximus
fScoSco1	Eukaryota	Metazoa	Chordata	Actinopteri	Scombriformes	Scombridae	Scomber	Scomber scombrus
fSprSpr1	Eukaryota	Metazoa	Chordata	Actinopteri	Clupeiformes	Clupeidae	Sprattus	Sprattus sprattus
fSquCep2	Eukaryota	Metazoa	Chordata	Actinopteri	Cypriniformes	Cyprinidae	Squalius	Squalius cephalus
fSymMel2	Eukaryota	Metazoa	Chordata	Actinopteri	Labriformes	Labridae	Symphodus	Symphodus melops
fSynAcu2	Eukaryota	Metazoa	Chordata	Actinopteri	Syngnathiformes	Syngnathidae	Syngnathus	Syngnathus acus
fTauBub2	Eukaryota	Metazoa	Chordata	Actinopteri	Perciformes	Cottidae	Taurulus	Taurulus bubalis
fTelBon1	Eukaryota	Metazoa	Chordata	Actinopteri	Atheriniformes	Telmatherinidae	Telmatherina	Telmatherina bonti
fThuMac1	Eukaryota	Metazoa	Chordata	Actinopteri	Scombriformes	Scombridae	Thunnus	Thunnus maccoyii
fTraTra1	Eukaryota	Metazoa	Chordata	Actinopteri	Carangiformes	Carangidae	Trachurus	Trachurus trachurus
fZeuFab8	Eukaryota	Metazoa	Chordata	Actinopteri	Zeiformes	Zeidae	Zeus	Zeus faber
gfAgaBisp1	Eukaryota	Fungi	Basidiomycota	Agaricomycetes	Agaricales	Agaricaceae	Agaricus	Agaricus bisporus
gfClaFumo1	Eukaryota	Fungi	Basidiomycota	Agaricomycetes	Agaricales	Clavariaceae	Clavaria	Clavaria fumosa
gfFlaVelt1	Eukaryota	Fungi	Basidiomycota	Agaricomycetes	Agaricales	Physalacriaceae	Flammulina	Flammulina velutipes
gfLaeSulp1	Eukaryota	Fungi	Basidiomycota	Agaricomycetes	Polyporales	Laetiporaceae	Laetiporus	Laetiporus sulphureus
gfPleOstr1	Eukaryota	Fungi	Basidiomycota	Agaricomycetes	Agaricales	Pleurotaceae	Pleurotus	Pleurotus ostreatus
gfPorCaly1	Eukaryota	Fungi	Basidiomycota	Agaricomycetes	Agaricales	Hygrophoraceae	Porpolomopsis	Porpolomopsis calyptriformis
glLicPygm2	Eukaryota	Fungi	Ascomycota	Lichinomycetes	Lichinales	Lichinaceae	Lichina	Lichina pygmaea
grCorFumo1	Eukaryota	Fungi	Ascomycota	Sordariomycetes	Hypocreales	Cordycipitaceae	Cordyceps	Cordyceps fumosorosea
grSimLame1	Eukaryota	Fungi	Ascomycota	Sordariomycetes	Hypocreales	Cordycipitaceae	Simplicillium	Simplicillium lamellicola
grTriPseu1	Eukaryota	Fungi	Ascomycota	Sordariomycetes	Hypocreales	Hypocreaceae	Trichoderma	Trichoderma citrinoviride
gsMetZobe1	Eukaryota	Fungi	Ascomycota	Pichiomycetes	Serinales	Metschnikowiaceae	Metschnikowia	Metschnikowia zobellii
gzEntParv1	Eukaryota	Fungi	Mucoromycota	Mortierellomycetes	Mortierellales	Mortierellaceae	Entomortierella	Entomortierella parvispora
gzMucPiri1	Eukaryota	Fungi	Mucoromycota	Mucoromycetes	Mucorales	Mucoraceae	Mucor	Mucor piriformis
iHemFuc2	Eukaryota	Metazoa	Arthropoda	Insecta	Lepidoptera	Sphingidae	Hemaris	Hemaris fuciformis
icAdaBipu15	Eukaryota	Metazoa	Arthropoda	Insecta	Coleoptera	Coccinellidae	Adalia	Adalia bipunctata
icAdaBipu20	Eukaryota	Metazoa	Arthropoda	Insecta	Coleoptera	Coccinellidae	Adalia	Adalia bipunctata
icAdaBipu28	Eukaryota	Metazoa	Arthropoda	Insecta	Coleoptera	Coccinellidae	Adalia	Adalia bipunctata
icAdaBipu29	Eukaryota	Metazoa	Arthropoda	Insecta	Coleoptera	Coccinellidae	Adalia	Adalia bipunctata
icAdaBipu31	Eukaryota	Metazoa	Arthropoda	Insecta	Coleoptera	Coccinellidae	Adalia	Adalia bipunctata
icAdaBipu32	Eukaryota	Metazoa	Arthropoda	Insecta	Coleoptera	Coccinellidae	Adalia	Adalia bipunctata
icAdaBipu33	Eukaryota	Metazoa	Arthropoda	Insecta	Coleoptera	Coccinellidae	Adalia	Adalia bipunctata
icAdaBipu34	Eukaryota	Metazoa	Arthropoda	Insecta	Coleoptera	Coccinellidae	Adalia	Adalia bipunctata
icAdaBipu36	Eukaryota	Metazoa	Arthropoda	Insecta	Coleoptera	Coccinellidae	Adalia	Adalia bipunctata
icAdaBipu6	Eukaryota	Metazoa	Arthropoda	Insecta	Coleoptera	Coccinellidae	Adalia	Adalia bipunctata
icAdaBipu9	Eukaryota	Metazoa	Arthropoda	Insecta	Coleoptera	Coccinellidae	Adalia	Adalia bipunctata
icAdaBipu1	Eukaryota	Metazoa	Arthropoda	Insecta	Coleoptera	Coccinellidae	Adalia	Adalia bipunctata
icAgoFuli1	Eukaryota	Metazoa	Arthropoda	Insecta	Coleoptera	Carabidae	Agonum	Agonum fuliginosum
icAgrCyan1	Eukaryota	Metazoa	Arthropoda	Insecta	Coleoptera	Buprestidae	Agrilus	Agrilus cyanescens
icAgrMuri1	Eukaryota	Metazoa	Arthropoda	Insecta	Coleoptera	Elateridae	Agrypnus	Agrypnus murinus
icAnaMacu3	Eukaryota	Metazoa	Arthropoda	Insecta	Coleoptera	Scraptiidae	Anaspis	Anaspis maculata
icApoCory1	Eukaryota	Metazoa	Arthropoda	Insecta	Coleoptera	Attelabidae	Apoderus	Apoderus coryli
icCanRufa1	Eukaryota	Metazoa	Arthropoda	Insecta	Coleoptera	Cantharidae	Cantharis	Cantharis rufa
icCanRust3	Eukaryota	Metazoa	Arthropoda	Insecta	Coleoptera	Cantharidae	Cantharis	Cantharis rustica
icCanRust1	Eukaryota	Metazoa	Arthropoda	Insecta	Coleoptera	Cantharidae	Cantharis	Cantharis rustica
icCetAura1	Eukaryota	Metazoa	Arthropoda	Insecta	Coleoptera	Scarabaeidae	Cetonia	Cetonia aurata
icChrOric1	Eukaryota	Metazoa	Arthropoda	Insecta	Coleoptera	Chrysomelidae	Chrysolina	Chrysolina oricalcia
icCocSept1	Eukaryota	Metazoa	Arthropoda	Insecta	Coleoptera	Coccinellidae	Coccinella	Coccinella septempunctata
icCryMora2	Eukaryota	Metazoa	Arthropoda	Insecta	Coleoptera	Chrysomelidae	Cryptocephalus	Cryptocephalus moraei
icElmAene2	Eukaryota	Metazoa	Arthropoda	Insecta	Coleoptera	Elmidae	Elmis	Elmis aenea
icHalSede1	Eukaryota	Metazoa	Arthropoda	Insecta	Coleoptera	Coccinellidae	Halyzia	Halyzia sedecimguttata
icHarAxyr1	Eukaryota	Metazoa	Arthropoda	Insecta	Coleoptera	Coccinellidae	Harmonia	Harmonia axyridis
icLagHirt1	Eukaryota	Metazoa	Arthropoda	Insecta	Coleoptera	Tenebrionidae	Lagria	Lagria hirta
icLeiSpin1	Eukaryota	Metazoa	Arthropoda	Insecta	Coleoptera	Carabidae	Leistus	Leistus spinibarbis
icLepMacu1	Eukaryota	Metazoa	Arthropoda	Insecta	Coleoptera	Cerambycidae	Rutpela	Rutpela maculata
icLocCapr1	Eukaryota	Metazoa	Arthropoda	Insecta	Coleoptera	Chrysomelidae	Lochmaea	Lochmaea capreae
icLocCrat2	Eukaryota	Metazoa	Arthropoda	Insecta	Coleoptera	Chrysomelidae	Lochmaea	Lochmaea crataegi
icMalBipu1	Eukaryota	Metazoa	Arthropoda	Insecta	Coleoptera	Melyridae	Malachius	Malachius bipustulatus
icMelMelo1	Eukaryota	Metazoa	Arthropoda	Insecta	Coleoptera	Scarabaeidae	Melolontha	Melolontha melolontha
icNebBrev1	Eukaryota	Metazoa	Arthropoda	Insecta	Coleoptera	Carabidae	Nebria	Nebria brevicollis
icNebSali1	Eukaryota	Metazoa	Arthropoda	Insecta	Coleoptera	Carabidae	Nebria	Nebria salina
icOcyOlen1	Eukaryota	Metazoa	Arthropoda	Insecta	Coleoptera	Staphylinidae	Ocypus	Ocypus olens
icOphArdo1	Eukaryota	Metazoa	Arthropoda	Insecta	Coleoptera	Carabidae	Ophonus	Ophonus ardosiacus
icPhiCogn1	Eukaryota	Metazoa	Arthropoda	Insecta	Coleoptera	Staphylinidae	Philonthus	Philonthus cognatus
icPodAlpi1	Eukaryota	Metazoa	Arthropoda	Insecta	Coleoptera	Cantharidae	Podabrus	Podabrus alpinus
icPolCerv1	Eukaryota	Metazoa	Arthropoda	Insecta	Coleoptera	Curculionidae	Polydrusus	Polydrusus cervinus
icPteMadi3	Eukaryota	Metazoa	Arthropoda	Insecta	Coleoptera	Carabidae	Pterostichus	Pterostichus madidus
icPteMadi1	Eukaryota	Metazoa	Arthropoda	Insecta	Coleoptera	Carabidae	Pterostichus	Pterostichus madidus
icPteNige1	Eukaryota	Metazoa	Arthropoda	Insecta	Coleoptera	Carabidae	Pterostichus	Pterostichus niger
icPyrSerr1	Eukaryota	Metazoa	Arthropoda	Insecta	Coleoptera	Pyrochroidae	Pyrochroa	Pyrochroa serraticornis
icRhaFulv1	Eukaryota	Metazoa	Arthropoda	Insecta	Coleoptera	Cantharidae	Rhagonycha	Rhagonycha fulva
icSilAtra2	Eukaryota	Metazoa	Arthropoda	Insecta	Coleoptera	Silphidae	Silpha	Phosphuga atrata
idAcrOrbc1	Eukaryota	Metazoa	Arthropoda	Insecta	Diptera	Acroceridae	Acrocera	Acrocera orbiculus
idBacElon1	Eukaryota	Metazoa	Arthropoda	Insecta	Diptera	Syrphidae	Baccha	Baccha elongata
idBelPand1	Eukaryota	Metazoa	Arthropoda	Insecta	Diptera	Calliphoridae	Bellardia	Bellardia pandia
idBerChal2	Eukaryota	Metazoa	Arthropoda	Insecta	Diptera	Stratiomyidae	Beris	Beris chalybata
idBibMarc1	Eukaryota	Metazoa	Arthropoda	Insecta	Diptera	Bibionidae	Bibio	Bibio marci
idBleFall4	Eukaryota	Metazoa	Arthropoda	Insecta	Diptera	Syrphidae	Blera	Blera fallax
idBomDisc1	Eukaryota	Metazoa	Arthropoda	Insecta	Diptera	Bombyliidae	Bombylius	Bombylius discolor
idBomMajo1	Eukaryota	Metazoa	Arthropoda	Insecta	Diptera	Bombyliidae	Bombylius	Bombylius major
idBraLaph1	Eukaryota	Metazoa	Arthropoda	Insecta	Diptera	Syrphidae	Brachypalpus	Brachypalpus laphriformis
idCalVomi1	Eukaryota	Metazoa	Arthropoda	Insecta	Diptera	Calliphoridae	Calliphora	Calliphora vomitoria
idCheImpr3	Eukaryota	Metazoa	Arthropoda	Insecta	Diptera	Syrphidae	Cheilosia	Cheilosia impressa
idChePaga1	Eukaryota	Metazoa	Arthropoda	Insecta	Diptera	Syrphidae	Cheilosia	Cheilosia pagana
idCheUrba1	Eukaryota	Metazoa	Arthropoda	Insecta	Diptera	Syrphidae	Cheilosia	Cheilosia urbana
idCheVern2	Eukaryota	Metazoa	Arthropoda	Insecta	Diptera	Syrphidae	Cheilosia	Cheilosia vernalis
idCheVulp2	Eukaryota	Metazoa	Arthropoda	Insecta	Diptera	Syrphidae	Cheilosia	Cheilosia vulpina
idChrBici1	Eukaryota	Metazoa	Arthropoda	Insecta	Diptera	Syrphidae	Chrysotoxum	Chrysotoxum bicinctum
idCisGlob1	Eukaryota	Metazoa	Arthropoda	Insecta	Diptera	Tachinidae	Cistogaster	Cistogaster globosa
idCluTigr1	Eukaryota	Metazoa	Arthropoda	Insecta	Diptera	Clusiidae	Clusia	Clusia tigrina
idCoePili4	Eukaryota	Metazoa	Arthropoda	Insecta	Diptera	Coelopidae	Coelopa	Coelopa pilipes
idCorMarg1	Eukaryota	Metazoa	Arthropoda	Insecta	Diptera	Sciomyzidae	Coremacera	Coremacera marginata
idCriBerb1	Eukaryota	Metazoa	Arthropoda	Insecta	Diptera	Syrphidae	Criorhina	Criorhina berberina
idDasAlbo1	Eukaryota	Metazoa	Arthropoda	Insecta	Diptera	Syrphidae	Dasysyrphus	Dasysyrphus albostriatus
idEpiBalt1	Eukaryota	Metazoa	Arthropoda	Insecta	Diptera	Syrphidae	Episyrphus	Episyrphus balteatus
idEpiEuco1	Eukaryota	Metazoa	Arthropoda	Insecta	Diptera	Syrphidae	Epistrophella	Epistrophella euchroma
idEpiGros1	Eukaryota	Metazoa	Arthropoda	Insecta	Diptera	Syrphidae	Epistrophe	Epistrophe grossulariae
idEpiSucc1	Eukaryota	Metazoa	Arthropoda	Insecta	Diptera	Tachinidae	Epicampocera	Epicampocera succincta
idEriArbu1	Eukaryota	Metazoa	Arthropoda	Insecta	Diptera	Syrphidae	Eristalis	Eristalis arbustorum
idEriPert2	Eukaryota	Metazoa	Arthropoda	Insecta	Diptera	Syrphidae	Eristalis	Eristalis pertinax
idEriSepu1	Eukaryota	Metazoa	Arthropoda	Insecta	Diptera	Syrphidae	Eristalinus	Eristalinus sepulchralis
idEriTena2	Eukaryota	Metazoa	Arthropoda	Insecta	Diptera	Syrphidae	Eristalis	Eristalis tenax
idEupCoro1	Eukaryota	Metazoa	Arthropoda	Insecta	Diptera	Syrphidae	Eupeodes	Eupeodes corollae
idEupLati1	Eukaryota	Metazoa	Arthropoda	Insecta	Diptera	Syrphidae	Eupeodes	Eupeodes latifasciatus
idGymRotn1	Eukaryota	Metazoa	Arthropoda	Insecta	Diptera	Tachinidae	Gymnosoma	Gymnosoma rotundatum
idLeuLate1	Eukaryota	Metazoa	Arthropoda	Insecta	Diptera	Syrphidae	Leucozona	Leucozona laternaria
idLypDubi1	Eukaryota	Metazoa	Arthropoda	Insecta	Diptera	Tachinidae	Lypha	Lypha dubia
idMacAtri3	Eukaryota	Metazoa	Arthropoda	Insecta	Diptera	Asilidae	Machimus	Machimus atricapillus
idMelAuri2	Eukaryota	Metazoa	Arthropoda	Insecta	Diptera	Syrphidae	Meliscaeva	Meliscaeva auricollis
idMelMell2	Eukaryota	Metazoa	Arthropoda	Insecta	Diptera	Syrphidae	Melanostoma	Melanostoma mellinum
idMyaFlor2	Eukaryota	Metazoa	Arthropoda	Insecta	Diptera	Syrphidae	Myathropa	Myathropa florea
idMyoTess1	Eukaryota	Metazoa	Arthropoda	Insecta	Diptera	Conopidae	Myopa	Myopa tessellatipennis
idNemNigr1	Eukaryota	Metazoa	Arthropoda	Insecta	Diptera	Stratiomyidae	Nemotelus	Nemotelus nigrinus
idNeoCyan1	Eukaryota	Metazoa	Arthropoda	Insecta	Diptera	Asilidae	Neoitamus	Neoitamus cyanurus
idNeoInte1	Eukaryota	Metazoa	Arthropoda	Insecta	Diptera	Syrphidae	Neoascia	Neoascia interrupta
idNepAppe1	Eukaryota	Metazoa	Arthropoda	Insecta	Diptera	Tipulidae	Nephrotoma	Nephrotoma appendiculata
idNepFlae1	Eukaryota	Metazoa	Arthropoda	Insecta	Diptera	Tipulidae	Nephrotoma	Nephrotoma flavescens
idNepScut1	Eukaryota	Metazoa	Arthropoda	Insecta	Diptera	Pipunculidae	Nephrocerus	Nephrocerus scutellatus
idNowFero1	Eukaryota	Metazoa	Arthropoda	Insecta	Diptera	Tachinidae	Nowickia	Nowickia ferox
idPheCory1	Eukaryota	Metazoa	Arthropoda	Insecta	Diptera	Sciomyzidae	Pherbina	Pherbina coryleti
idPhyMeln1	Eukaryota	Metazoa	Arthropoda	Insecta	Diptera	Rhinophoridae	Phyto	Phyto melanocephala
idPlaAlba3	Eukaryota	Metazoa	Arthropoda	Insecta	Diptera	Syrphidae	Platycheirus	Platycheirus albimanus
idPlaAlba4	Eukaryota	Metazoa	Arthropoda	Insecta	Diptera	Syrphidae	Platycheirus	Platycheirus albimanus
idPlaAlba1	Eukaryota	Metazoa	Arthropoda	Insecta	Diptera	Syrphidae	Platycheirus	Platycheirus albimanus
idPoeNobi2	Eukaryota	Metazoa	Arthropoda	Insecta	Diptera	Dolichopodidae	Poecilobothrus	Poecilobothrus nobilitatus
idPolAmen1	Eukaryota	Metazoa	Arthropoda	Insecta	Diptera	Polleniidae	Pollenia	Pollenia amentaria
idPolAngu1	Eukaryota	Metazoa	Arthropoda	Insecta	Diptera	Polleniidae	Pollenia	Pollenia angustigena
idPolDomi1	Eukaryota	Metazoa	Arthropoda	Insecta	Diptera	Muscidae	Polietes	Polietes domitor
idProAzur1	Eukaryota	Metazoa	Arthropoda	Insecta	Diptera	Calliphoridae	Protocalliphora	Protocalliphora azurea
idRhiCamp1	Eukaryota	Metazoa	Arthropoda	Insecta	Diptera	Syrphidae	Rhingia	Rhingia campestris
idSarCaer1	Eukaryota	Metazoa	Arthropoda	Insecta	Diptera	Sarcophagidae	Sarcophaga	Sarcophaga caerulescens
idSarRose1	Eukaryota	Metazoa	Arthropoda	Insecta	Diptera	Sarcophagidae	Sarcophaga	Sarcophaga rosellei
idSarSubv1	Eukaryota	Metazoa	Arthropoda	Insecta	Diptera	Sarcophagidae	Sarcophaga	Sarcophaga subvicina
idSarVari1	Eukaryota	Metazoa	Arthropoda	Insecta	Diptera	Sarcophagidae	Sarcophaga	Sarcophaga variegata
idScaPyra1	Eukaryota	Metazoa	Arthropoda	Insecta	Diptera	Syrphidae	Scaeva	Scaeva pyrastri
idSicFerr1	Eukaryota	Metazoa	Arthropoda	Insecta	Diptera	Conopidae	Sicus	Sicus ferrugineus
idSphTaen1	Eukaryota	Metazoa	Arthropoda	Insecta	Diptera	Syrphidae	Sphaerophoria	Sphaerophoria taeniata
idStoLuna1	Eukaryota	Metazoa	Arthropoda	Insecta	Diptera	Rhiniidae	Stomorhina	Stomorhina lunata
idSuiVari3	Eukaryota	Metazoa	Arthropoda	Insecta	Diptera	Heleomyzidae	Suillia	Suillia variegata
idSyrPipi10	Eukaryota	Metazoa	Arthropoda	Insecta	Diptera	Syrphidae	Syritta	Syritta pipiens
idSyrPipi11	Eukaryota	Metazoa	Arthropoda	Insecta	Diptera	Syrphidae	Syritta	Syritta pipiens
idSyrPipi2	Eukaryota	Metazoa	Arthropoda	Insecta	Diptera	Syrphidae	Syritta	Syritta pipiens
idSyrPipi5	Eukaryota	Metazoa	Arthropoda	Insecta	Diptera	Syrphidae	Syritta	Syritta pipiens
idSyrPipi6	Eukaryota	Metazoa	Arthropoda	Insecta	Diptera	Syrphidae	Syritta	Syritta pipiens
idSyrPipi7	Eukaryota	Metazoa	Arthropoda	Insecta	Diptera	Syrphidae	Syritta	Syritta pipiens
idSyrPipi8	Eukaryota	Metazoa	Arthropoda	Insecta	Diptera	Syrphidae	Syritta	Syritta pipiens
idSyrPipi9	Eukaryota	Metazoa	Arthropoda	Insecta	Diptera	Syrphidae	Syritta	Syritta pipiens
idSyrPipi1	Eukaryota	Metazoa	Arthropoda	Insecta	Diptera	Syrphidae	Syritta	Syritta pipiens
idTacFera2	Eukaryota	Metazoa	Arthropoda	Insecta	Diptera	Tachinidae	Tachina	Tachina fera
idTacLuri1	Eukaryota	Metazoa	Arthropoda	Insecta	Diptera	Tachinidae	Tachina	Tachina lurida
idTheAcut1	Eukaryota	Metazoa	Arthropoda	Insecta	Diptera	Tachinidae	Thecocarcelia	Thecocarcelia acutangulata
idTheAtra2	Eukaryota	Metazoa	Arthropoda	Insecta	Diptera	Conopidae	Thecophora	Thecophora atra
idTheSoli1	Eukaryota	Metazoa	Arthropoda	Insecta	Diptera	Tachinidae	Thelaira	Thelaira solivaga
idVolBomb1	Eukaryota	Metazoa	Arthropoda	Insecta	Diptera	Syrphidae	Volucella	Volucella bombylans
idVolInan1	Eukaryota	Metazoa	Arthropoda	Insecta	Diptera	Syrphidae	Volucella	Volucella inanis
idVolInfl1	Eukaryota	Metazoa	Arthropoda	Insecta	Diptera	Syrphidae	Volucella	Volucella inflata
idXanPedi1	Eukaryota	Metazoa	Arthropoda	Insecta	Diptera	Syrphidae	Xanthogramma	Xanthogramma pedissequum
idXylSylv2	Eukaryota	Metazoa	Arthropoda	Insecta	Diptera	Syrphidae	Xylota	Xylota sylvarum
ihAcaHaem1	Eukaryota	Metazoa	Arthropoda	Insecta	Hemiptera	Acanthosomatidae	Acanthosoma	Acanthosoma haemorrhoidale
ihAelAcum1	Eukaryota	Metazoa	Arthropoda	Insecta	Hemiptera	Pentatomidae	Aelia	Aelia acuminata
ihDrePlat2	Eukaryota	Metazoa	Arthropoda	Insecta	Hemiptera	Aphididae	Drepanosiphum	Drepanosiphum platanoidis
ihGonAcut1	Eukaryota	Metazoa	Arthropoda	Insecta	Hemiptera	Coreidae	Gonocerus	Gonocerus acuteangulatus
ihRhaNebu1	Eukaryota	Metazoa	Arthropoda	Insecta	Hemiptera	Pentatomidae	Rhaphigaster	Rhaphigaster nebulosa
iiAthCine2	Eukaryota	Metazoa	Arthropoda	Insecta	Trichoptera	Leptoceridae	Athripsodes	Athripsodes cinereus
iiGlyPell1	Eukaryota	Metazoa	Arthropoda	Insecta	Trichoptera	Limnephilidae	Glyphotaelius	Glyphotaelius pellucidus
iiLimLuna2	Eukaryota	Metazoa	Arthropoda	Insecta	Trichoptera	Limnephilidae	Limnephilus	Limnephilus lunatus
iiLimMarm1	Eukaryota	Metazoa	Arthropoda	Insecta	Trichoptera	Limnephilidae	Limnephilus	Limnephilus marmoratus
iiLimRhom1	Eukaryota	Metazoa	Arthropoda	Insecta	Trichoptera	Limnephilidae	Limnephilus	Limnephilus rhombicus
ilAbrTril1	Eukaryota	Metazoa	Arthropoda	Insecta	Lepidoptera	Noctuidae	Abrostola	Abrostola triplasia
ilAbrTrip1	Eukaryota	Metazoa	Arthropoda	Insecta	Lepidoptera	Noctuidae	Abrostola	Abrostola tripartita
ilAceEphe1	Eukaryota	Metazoa	Arthropoda	Insecta	Lepidoptera	Crambidae	Acentria	Acentria ephemerella
ilAchFlav2	Eukaryota	Metazoa	Arthropoda	Insecta	Lepidoptera	Drepanidae	Achlya	Achlya flavicornis
ilAclCris2	Eukaryota	Metazoa	Arthropoda	Insecta	Lepidoptera	Tortricidae	Acleris	Acleris cristana
ilAclEmar1	Eukaryota	Metazoa	Arthropoda	Insecta	Lepidoptera	Tortricidae	Acleris	Acleris emargana
ilAclLite1	Eukaryota	Metazoa	Arthropoda	Insecta	Lepidoptera	Tortricidae	Acleris	Acleris literana
ilAclSpar1	Eukaryota	Metazoa	Arthropoda	Insecta	Lepidoptera	Tortricidae	Acleris	Acleris sparsana
ilAcrAcer1	Eukaryota	Metazoa	Arthropoda	Insecta	Lepidoptera	Noctuidae	Acronicta	Acronicta aceris
ilAcrLepo1	Eukaryota	Metazoa	Arthropoda	Insecta	Lepidoptera	Noctuidae	Acronicta	Acronicta leporina
ilAcrPsix1	Eukaryota	Metazoa	Arthropoda	Insecta	Lepidoptera	Noctuidae	Acronicta	Acronicta psi
ilAcrSuav1	Eukaryota	Metazoa	Arthropoda	Insecta	Lepidoptera	Pyralidae	Acrobasis	Acrobasis suavella
ilAglIoxx1	Eukaryota	Metazoa	Arthropoda	Insecta	Lepidoptera	Nymphalidae	Inachis	Inachis io
ilAglUrti1	Eukaryota	Metazoa	Arthropoda	Insecta	Lepidoptera	Nymphalidae	Aglais	Nymphalis urticae
ilAgoAren1	Eukaryota	Metazoa	Arthropoda	Insecta	Lepidoptera	Depressariidae	Agonopterix	Agonopterix arenella
ilAgoSubp1	Eukaryota	Metazoa	Arthropoda	Insecta	Lepidoptera	Depressariidae	Agonopterix	Agonopterix subpropinquella
ilAgrAura1	Eukaryota	Metazoa	Arthropoda	Insecta	Lepidoptera	Geometridae	Agriopis	Agriopis aurantiaria
ilAgrCirc1	Eukaryota	Metazoa	Arthropoda	Insecta	Lepidoptera	Noctuidae	Agrochola	Agrochola circellaris
ilAgrLeuc1	Eukaryota	Metazoa	Arthropoda	Insecta	Lepidoptera	Geometridae	Agriopis	Agriopis leucophaearia
ilAgrLota1	Eukaryota	Metazoa	Arthropoda	Insecta	Lepidoptera	Noctuidae	Agrochola	Agrochola lota
ilAgrMaci1	Eukaryota	Metazoa	Arthropoda	Insecta	Lepidoptera	Noctuidae	Agrochola	Agrochola macilenta
ilAgrMarg1	Eukaryota	Metazoa	Arthropoda	Insecta	Lepidoptera	Geometridae	Agriopis	Agriopis marginaria
ilAgrPuta1	Eukaryota	Metazoa	Arthropoda	Insecta	Lepidoptera	Noctuidae	Agrotis	Agrotis puta
ilAgrTris1	Eukaryota	Metazoa	Arthropoda	Insecta	Lepidoptera	Crambidae	Agriphila	Agriphila tristella
ilAlcRepa2	Eukaryota	Metazoa	Arthropoda	Insecta	Lepidoptera	Geometridae	Alcis	Alcis repandata
ilAllOxya1	Eukaryota	Metazoa	Arthropoda	Insecta	Lepidoptera	Noctuidae	Allophyes	Allophyes oxyacanthae
ilAlsAesc1	Eukaryota	Metazoa	Arthropoda	Insecta	Lepidoptera	Geometridae	Alsophila	Alsophila aescularia
ilAmpBerb1	Eukaryota	Metazoa	Arthropoda	Insecta	Lepidoptera	Noctuidae	Amphipyra	Amphipyra berbera
ilAmpLuce6	Eukaryota	Metazoa	Arthropoda	Insecta	Lepidoptera	Noctuidae	Amphipoea	Amphipoea lucens
ilAmpOcul1	Eukaryota	Metazoa	Arthropoda	Insecta	Lepidoptera	Noctuidae	Amphipoea	Amphipoea oculea
ilAmpTrag2	Eukaryota	Metazoa	Arthropoda	Insecta	Lepidoptera	Noctuidae	Amphipyra	Amphipyra tragopoginis
ilAnaInnx2	Eukaryota	Metazoa	Arthropoda	Insecta	Lepidoptera	Gelechiidae	Anarsia	Anarsia innoxiella
ilAnoMund1	Eukaryota	Metazoa	Arthropoda	Insecta	Lepidoptera	Noctuidae	Anorthoa	Anorthoa munda
ilAntCard3	Eukaryota	Metazoa	Arthropoda	Insecta	Lepidoptera	Pieridae	Anthocharis	Anthocharis cardamines
ilAntChix2	Eukaryota	Metazoa	Arthropoda	Insecta	Lepidoptera	Noctuidae	Antitype	Antitype chi
ilAntDeri1	Eukaryota	Metazoa	Arthropoda	Insecta	Lepidoptera	Geometridae	Anticlea	Anticlea derivata
ilApaEpom1	Eukaryota	Metazoa	Arthropoda	Insecta	Lepidoptera	Noctuidae	Apamea	Apamea epomidion
ilApaMono1	Eukaryota	Metazoa	Arthropoda	Insecta	Lepidoptera	Noctuidae	Apamea	Apamea monoglypha
ilApaSord1	Eukaryota	Metazoa	Arthropoda	Insecta	Lepidoptera	Noctuidae	Apamea	Apamea sordens
ilApeSyri1	Eukaryota	Metazoa	Arthropoda	Insecta	Lepidoptera	Geometridae	Apeira	Apeira syringaria
ilAplEffo1	Eukaryota	Metazoa	Arthropoda	Insecta	Lepidoptera	Geometridae	Aplocera	Aplocera efformata
ilApoBetu1	Eukaryota	Metazoa	Arthropoda	Insecta	Lepidoptera	Tortricidae	Apotomis	Apotomis betuletana
ilApoBist1	Eukaryota	Metazoa	Arthropoda	Insecta	Lepidoptera	Pyralidae	Apomyelois	Apomyelois bistriatella
ilApoCapr1	Eukaryota	Metazoa	Arthropoda	Insecta	Lepidoptera	Tortricidae	Apotomis	Apotomis capreana
ilApoCrat1	Eukaryota	Metazoa	Arthropoda	Insecta	Lepidoptera	Pieridae	Aporia	Aporia crataegi
ilApoHisp1	Eukaryota	Metazoa	Arthropoda	Insecta	Lepidoptera	Geometridae	Apocheima	Apocheima hispidaria
ilApoLima1	Eukaryota	Metazoa	Arthropoda	Insecta	Lepidoptera	Limacodidae	Apoda	Apoda limacodes
ilApoLuen1	Eukaryota	Metazoa	Arthropoda	Insecta	Lepidoptera	Noctuidae	Aporophyla	Aporophyla lueneburgensis
ilApoNigr3	Eukaryota	Metazoa	Arthropoda	Insecta	Lepidoptera	Noctuidae	Aporophyla	Aporophyla nigra
ilApoTurb1	Eukaryota	Metazoa	Arthropoda	Insecta	Lepidoptera	Tortricidae	Apotomis	Apotomis turbidana
ilArcCraa1	Eukaryota	Metazoa	Arthropoda	Insecta	Lepidoptera	Tortricidae	Archips	Archips crataeganus
ilArcXylo1	Eukaryota	Metazoa	Arthropoda	Insecta	Lepidoptera	Tortricidae	Archips	Archips xylosteana
ilAriAges2	Eukaryota	Metazoa	Arthropoda	Insecta	Lepidoptera	Lycaenidae	Aricia	Aricia agestis
ilAriAges1	Eukaryota	Metazoa	Arthropoda	Insecta	Lepidoptera	Lycaenidae	Aricia	Aricia agestis
ilAriArta2	Eukaryota	Metazoa	Arthropoda	Insecta	Lepidoptera	Lycaenidae	Aricia	Aricia artaxerxes
ilAteCent1	Eukaryota	Metazoa	Arthropoda	Insecta	Lepidoptera	Noctuidae	Atethmia	Atethmia centrago
ilAthMouf1	Eukaryota	Metazoa	Arthropoda	Insecta	Lepidoptera	Gelechiidae	Athrips	Athrips mouffetella
ilAutGamm1	Eukaryota	Metazoa	Arthropoda	Insecta	Lepidoptera	Noctuidae	Autographa	Autographa gamma
ilAutPulc1	Eukaryota	Metazoa	Arthropoda	Insecta	Lepidoptera	Noctuidae	Autographa	Autographa pulchrina
ilBemIchn1	Eukaryota	Metazoa	Arthropoda	Insecta	Lepidoptera	Sesiidae	Bembecia	Bembecia ichneumoniformis
ilBicAnyn1	Eukaryota	Metazoa	Arthropoda	Insecta	Lepidoptera	Nymphalidae	Bicyclus	Bicyclus anynana
ilBisBetu1	Eukaryota	Metazoa	Arthropoda	Insecta	Lepidoptera	Geometridae	Biston	Biston betularia
ilBlaAdus2	Eukaryota	Metazoa	Arthropoda	Insecta	Lepidoptera	Blastobasidae	Blastobasis	Blastobasis adustella
ilBlaLact1	Eukaryota	Metazoa	Arthropoda	Insecta	Lepidoptera	Blastobasidae	Blastobasis	Blastobasis lacticolella
ilBolSele5	Eukaryota	Metazoa	Arthropoda	Insecta	Lepidoptera	Nymphalidae	Boloria	Boloria selene
ilBraVimi1	Eukaryota	Metazoa	Arthropoda	Insecta	Lepidoptera	Noctuidae	Brachylomia	Brachylomia viminalis
ilCalPalu1	Eukaryota	Metazoa	Arthropoda	Insecta	Lepidoptera	Crambidae	Calamotropha	Calamotropha paludella
ilCamMarg1	Eukaryota	Metazoa	Arthropoda	Insecta	Lepidoptera	Geometridae	Campaea	Campaea margaritaria
ilCarClav1	Eukaryota	Metazoa	Arthropoda	Insecta	Lepidoptera	Noctuidae	Caradrina	Caradrina clavipalpis
ilCarKade1	Eukaryota	Metazoa	Arthropoda	Insecta	Lepidoptera	Noctuidae	Caradrina	Caradrina kadenii
ilCarPala2	Eukaryota	Metazoa	Arthropoda	Insecta	Lepidoptera	Hesperiidae	Carterocephalus	Carterocephalus palaemon
ilCarQuer1	Eukaryota	Metazoa	Arthropoda	Insecta	Lepidoptera	Depressariidae	Carcina	Carcina quercana
ilCatFrax1	Eukaryota	Metazoa	Arthropoda	Insecta	Lepidoptera	Erebidae	Catocala	Catocala fraxini
ilCelArgi3	Eukaryota	Metazoa	Arthropoda	Insecta	Lepidoptera	Lycaenidae	Celastrina	Celastrina argiolus
ilChaFerr1	Eukaryota	Metazoa	Arthropoda	Insecta	Lepidoptera	Noctuidae	Charanyca	Charanyca ferruginea
ilCheLega1	Eukaryota	Metazoa	Arthropoda	Insecta	Lepidoptera	Geometridae	Chesias	Chesias legatella
ilChlSite2	Eukaryota	Metazoa	Arthropoda	Insecta	Lepidoptera	Geometridae	Chloroclysta	Chloroclysta siterata
ilChrCulm1	Eukaryota	Metazoa	Arthropoda	Insecta	Lepidoptera	Crambidae	Chrysoteuchia	Chrysoteuchia culmella
ilCloCurt1	Eukaryota	Metazoa	Arthropoda	Insecta	Lepidoptera	Notodontidae	Clostera	Clostera curtula
ilColCroc2	Eukaryota	Metazoa	Arthropoda	Insecta	Lepidoptera	Pieridae	Colias	Colias croceus
ilColFlav1	Eukaryota	Metazoa	Arthropoda	Insecta	Lepidoptera	Coleophoridae	Coleophora	Coleophora flavipennella
ilConVacc3	Eukaryota	Metazoa	Arthropoda	Insecta	Lepidoptera	Noctuidae	Conistra	Conistra vaccinii
ilCosPyra2	Eukaryota	Metazoa	Arthropoda	Insecta	Lepidoptera	Noctuidae	Cosmia	Cosmia pyralina
ilCosTrap1	Eukaryota	Metazoa	Arthropoda	Insecta	Lepidoptera	Noctuidae	Cosmia	Cosmia trapezina
ilCraLigu1	Eukaryota	Metazoa	Arthropoda	Insecta	Lepidoptera	Noctuidae	Craniophora	Craniophora ligustri
ilCroElin1	Eukaryota	Metazoa	Arthropoda	Insecta	Lepidoptera	Geometridae	Crocallis	Crocallis elinguaria
ilCyaSemi1	Eukaryota	Metazoa	Arthropoda	Insecta	Lepidoptera	Lycaenidae	Cyaniris	Cyaniris semiargus
ilCybMeso1	Eukaryota	Metazoa	Arthropoda	Insecta	Lepidoptera	Erebidae	Cybosia	Cybosia mesomella
ilCydAmpl1	Eukaryota	Metazoa	Arthropoda	Insecta	Lepidoptera	Tortricidae	Cydia	Cydia amplana
ilCydSple1	Eukaryota	Metazoa	Arthropoda	Insecta	Lepidoptera	Tortricidae	Cydia	Cydia splendana
ilCydStro1	Eukaryota	Metazoa	Arthropoda	Insecta	Lepidoptera	Tortricidae	Cydia	Cydia strobilella
ilCydStro3	Eukaryota	Metazoa	Arthropoda	Insecta	Lepidoptera	Tortricidae	Cydia	Cydia strobilella
ilDeiPorc1	Eukaryota	Metazoa	Arthropoda	Insecta	Lepidoptera	Sphingidae	Deilephila	Deilephila porcellus
ilDiaChry1	Eukaryota	Metazoa	Arthropoda	Insecta	Lepidoptera	Noctuidae	Diachrysia	Diachrysia chrysitis
ilDiaMend1	Eukaryota	Metazoa	Arthropoda	Insecta	Lepidoptera	Erebidae	Diaphora	Diaphora mendica
ilDiaRubi1	Eukaryota	Metazoa	Arthropoda	Insecta	Lepidoptera	Noctuidae	Diarsia	Diarsia rubi
ilDicOoxx2	Eukaryota	Metazoa	Arthropoda	Insecta	Lepidoptera	Noctuidae	Dicycla	Dicycla oo
ilDilCaer1	Eukaryota	Metazoa	Arthropoda	Insecta	Lepidoptera	Noctuidae	Diloba	Diloba caeruleocephala
ilDreFalc1	Eukaryota	Metazoa	Arthropoda	Insecta	Lepidoptera	Drepanidae	Drepana	Drepana falcataria
ilDryErem1	Eukaryota	Metazoa	Arthropoda	Insecta	Lepidoptera	Noctuidae	Dryobotodes	Dryobotodes eremita
ilDryLabe1	Eukaryota	Metazoa	Arthropoda	Insecta	Lepidoptera	Noctuidae	Dryobota	Dryobota labecula
ilDryRufi1	Eukaryota	Metazoa	Arthropoda	Insecta	Lepidoptera	Notodontidae	Drymonia	Drymonia ruficornis
ilEclSila1	Eukaryota	Metazoa	Arthropoda	Insecta	Lepidoptera	Geometridae	Ecliptopera	Ecliptopera silaceata
ilEilCani1	Eukaryota	Metazoa	Arthropoda	Insecta	Lepidoptera	Erebidae	Eilema	Eilema caniola
ilEilDepe1	Eukaryota	Metazoa	Arthropoda	Insecta	Lepidoptera	Erebidae	Eilema	Eilema depressum
ilEilSoro1	Eukaryota	Metazoa	Arthropoda	Insecta	Lepidoptera	Erebidae	Eilema	Eilema sororcula
ilEleCory1	Eukaryota	Metazoa	Arthropoda	Insecta	Lepidoptera	Geometridae	Electrophaes	Electrophaes corylata
ilEleSimi1	Eukaryota	Metazoa	Arthropoda	Insecta	Lepidoptera	Pyralidae	Elegia	Elegia similella
ilEmmMono1	Eukaryota	Metazoa	Arthropoda	Insecta	Lepidoptera	Pterophoridae	Emmelina	Emmelina monodactyla
ilEndFlam1	Eukaryota	Metazoa	Arthropoda	Insecta	Lepidoptera	Pyralidae	Endotricha	Endotricha flammealis
ilEnnFusc2	Eukaryota	Metazoa	Arthropoda	Insecta	Lepidoptera	Geometridae	Ennomos	Ennomos fuscantarius
ilEnnQuei1	Eukaryota	Metazoa	Arthropoda	Insecta	Lepidoptera	Geometridae	Ennomos	Ennomos quercinarius
ilEpiBilu1	Eukaryota	Metazoa	Arthropoda	Insecta	Lepidoptera	Tortricidae	Epinotia	Epinotia bilunana
ilEpiDema1	Eukaryota	Metazoa	Arthropoda	Insecta	Lepidoptera	Tortricidae	Epinotia	Epinotia demarniana
ilEpiNise2	Eukaryota	Metazoa	Arthropoda	Insecta	Lepidoptera	Tortricidae	Epinotia	Epinotia nisella
ilEpiRame1	Eukaryota	Metazoa	Arthropoda	Insecta	Lepidoptera	Tortricidae	Epinotia	Epinotia ramella
ilEraDefo1	Eukaryota	Metazoa	Arthropoda	Insecta	Lepidoptera	Geometridae	Erannis	Erannis defoliaria
ilEreAeth2	Eukaryota	Metazoa	Arthropoda	Insecta	Lepidoptera	Nymphalidae	Erebia	Erebia aethiops
ilEreLige1	Eukaryota	Metazoa	Arthropoda	Insecta	Lepidoptera	Nymphalidae	Erebia	Erebia ligea
ilEryTage1	Eukaryota	Metazoa	Arthropoda	Insecta	Lepidoptera	Hesperiidae	Erynnis	Erynnis tages
ilEspSulp1	Eukaryota	Metazoa	Arthropoda	Insecta	Lepidoptera	Oecophoridae	Esperia	Esperia sulphurella
ilEucMixx1	Eukaryota	Metazoa	Arthropoda	Insecta	Lepidoptera	Erebidae	Euclidia	Euclidia mi
ilEudLacu3	Eukaryota	Metazoa	Arthropoda	Insecta	Lepidoptera	Crambidae	Eudonia	Eudonia lacustrata
ilEudProf1	Eukaryota	Metazoa	Arthropoda	Insecta	Lepidoptera	Tortricidae	Eudemis	Eudemis profundana
ilEugGlar6	Eukaryota	Metazoa	Arthropoda	Insecta	Lepidoptera	Noctuidae	Eugnorisma	Eugnorisma glareosa
ilEulPrun1	Eukaryota	Metazoa	Arthropoda	Insecta	Lepidoptera	Geometridae	Eulithis	Eulithis prunata
ilEulTest2	Eukaryota	Metazoa	Arthropoda	Insecta	Lepidoptera	Geometridae	Eulithis	Eulithis testata
ilEupAbbr2	Eukaryota	Metazoa	Arthropoda	Insecta	Lepidoptera	Geometridae	Eupithecia	Eupithecia abbreviata
ilEupCent1	Eukaryota	Metazoa	Arthropoda	Insecta	Lepidoptera	Geometridae	Eupithecia	Eupithecia centaureata
ilEupDodo1	Eukaryota	Metazoa	Arthropoda	Insecta	Lepidoptera	Geometridae	Eupithecia	Eupithecia dodoneata
ilEupExig1	Eukaryota	Metazoa	Arthropoda	Insecta	Lepidoptera	Geometridae	Eupithecia	Eupithecia exiguata
ilEupInsi1	Eukaryota	Metazoa	Arthropoda	Insecta	Lepidoptera	Geometridae	Eupithecia	Eupithecia insigniata
ilEupLuci1	Eukaryota	Metazoa	Arthropoda	Insecta	Lepidoptera	Noctuidae	Euplexia	Euplexia lucipara
ilEupSimi1	Eukaryota	Metazoa	Arthropoda	Insecta	Lepidoptera	Erebidae	Euproctis	Euproctis similis
ilEupTran1	Eukaryota	Metazoa	Arthropoda	Insecta	Lepidoptera	Noctuidae	Eupsilia	Eupsilia transversa
ilEupVulg1	Eukaryota	Metazoa	Arthropoda	Insecta	Lepidoptera	Geometridae	Eupithecia	Eupithecia vulgata
ilEuzPing2	Eukaryota	Metazoa	Arthropoda	Insecta	Lepidoptera	Pyralidae	Euzophera	Euzophera pinguis
ilFabAdip1	Eukaryota	Metazoa	Arthropoda	Insecta	Lepidoptera	Nymphalidae	Fabriciana	Fabriciana adippe
ilFisYpsi1	Eukaryota	Metazoa	Arthropoda	Insecta	Lepidoptera	Noctuidae	Fissipunctia	Fissipunctia ypsillon
ilFurFurc1	Eukaryota	Metazoa	Arthropoda	Insecta	Lepidoptera	Notodontidae	Furcula	Furcula furcula
ilGanPyra1	Eukaryota	Metazoa	Arthropoda	Insecta	Lepidoptera	Geometridae	Gandaritis	Gandaritis pyraliata
ilGlaAlex1	Eukaryota	Metazoa	Arthropoda	Insecta	Lepidoptera	Lycaenidae	Glaucopsyche	Glaucopsyche alexis
ilGriApri1	Eukaryota	Metazoa	Arthropoda	Insecta	Lepidoptera	Noctuidae	Griposia	Griposia aprilina
ilGymRufi1	Eukaryota	Metazoa	Arthropoda	Insecta	Lepidoptera	Geometridae	Gymnoscelis	Gymnoscelis rufifasciata
ilHabPyri1	Eukaryota	Metazoa	Arthropoda	Insecta	Lepidoptera	Drepanidae	Habrosyne	Habrosyne pyritoides
ilHecDyso1	Eukaryota	Metazoa	Arthropoda	Insecta	Lepidoptera	Noctuidae	Hecatera	Hecatera dysodea
ilHedSali1	Eukaryota	Metazoa	Arthropoda	Insecta	Lepidoptera	Tortricidae	Hedya	Hedya salicella
ilHemAest2	Eukaryota	Metazoa	Arthropoda	Insecta	Lepidoptera	Geometridae	Hemithea	Hemithea aestivaria
ilHemChry1	Eukaryota	Metazoa	Arthropoda	Insecta	Lepidoptera	Geometridae	Hemistola	Hemistola chrysoprasaria
ilHerTari1	Eukaryota	Metazoa	Arthropoda	Insecta	Lepidoptera	Erebidae	Herminia	Herminia tarsipennalis
ilHesComm1	Eukaryota	Metazoa	Arthropoda	Insecta	Lepidoptera	Hesperiidae	Hesperia	Hesperia comma
ilHipSeme1	Eukaryota	Metazoa	Arthropoda	Insecta	Lepidoptera	Nymphalidae	Hipparchia	Hipparchia semele
ilHofPseu3	Eukaryota	Metazoa	Arthropoda	Insecta	Lepidoptera	Oecophoridae	Hofmannophila	Hofmannophila pseudospretella
ilHydFurc1	Eukaryota	Metazoa	Arthropoda	Insecta	Lepidoptera	Geometridae	Hydriomena	Hydriomena furcata
ilHydMica1	Eukaryota	Metazoa	Arthropoda	Insecta	Lepidoptera	Noctuidae	Hydraecia	Hydraecia micacea
ilHylFasc1	Eukaryota	Metazoa	Arthropoda	Insecta	Lepidoptera	Geometridae	Hylaea	Hylaea fasciaria
ilHypCost1	Eukaryota	Metazoa	Arthropoda	Insecta	Lepidoptera	Pyralidae	Hypsopygia	Hypsopygia costalis
ilHypProb1	Eukaryota	Metazoa	Arthropoda	Insecta	Lepidoptera	Erebidae	Hypena	Hypena proboscidalis
ilIdaAver1	Eukaryota	Metazoa	Arthropoda	Insecta	Lepidoptera	Geometridae	Idaea	Idaea aversata
ilIncMasc1	Eukaryota	Metazoa	Arthropoda	Insecta	Lepidoptera	Incurvariidae	Incurvaria	Incurvaria masculella
ilLacWlai2	Eukaryota	Metazoa	Arthropoda	Insecta	Lepidoptera	Noctuidae	Lacanobia	Lacanobia wlatinum
ilLamSuff1	Eukaryota	Metazoa	Arthropoda	Insecta	Lepidoptera	Geometridae	Lampropteryx	Lampropteryx suffumata
ilLaoPopu1	Eukaryota	Metazoa	Arthropoda	Insecta	Lepidoptera	Sphingidae	Laothoe	Laothoe populi
ilLasFlex1	Eukaryota	Metazoa	Arthropoda	Insecta	Lepidoptera	Erebidae	Laspeyria	Laspeyria flexula
ilLasMege1	Eukaryota	Metazoa	Arthropoda	Insecta	Lepidoptera	Nymphalidae	Lasiommata	Lasiommata megera
ilLatStri6	Eukaryota	Metazoa	Arthropoda	Insecta	Lepidoptera	Tortricidae	Lathronympha	Lathronympha strigana
ilLepSina1	Eukaryota	Metazoa	Arthropoda	Insecta	Lepidoptera	Pieridae	Leptidea	Leptidea sinapis
ilLeuSali1	Eukaryota	Metazoa	Arthropoda	Insecta	Lepidoptera	Erebidae	Leucoma	Leucoma salicis
ilLigAdus1	Eukaryota	Metazoa	Arthropoda	Insecta	Lepidoptera	Geometridae	Ligdia	Ligdia adustata
ilLimCami1	Eukaryota	Metazoa	Arthropoda	Insecta	Lepidoptera	Nymphalidae	Limenitis	Limenitis camilla
ilLitOrni1	Eukaryota	Metazoa	Arthropoda	Insecta	Lepidoptera	Noctuidae	Lithophane	Lithophane ornitopus
ilLitSemi2	Eukaryota	Metazoa	Arthropoda	Insecta	Lepidoptera	Noctuidae	Lithophane	Lithophane semibrunnea
ilLitSoci1	Eukaryota	Metazoa	Arthropoda	Insecta	Lepidoptera	Noctuidae	Lithophane	Lithophane socia
ilLobHalt1	Eukaryota	Metazoa	Arthropoda	Insecta	Lepidoptera	Geometridae	Lobophora	Lobophora halterata
ilLomBima1	Eukaryota	Metazoa	Arthropoda	Insecta	Lepidoptera	Geometridae	Lomographa	Lomographa bimaculata
ilLupTest1	Eukaryota	Metazoa	Arthropoda	Insecta	Lepidoptera	Noctuidae	Luperina	Luperina testacea
ilLycHirt1	Eukaryota	Metazoa	Arthropoda	Insecta	Lepidoptera	Geometridae	Lycia	Lycia hirtaria
ilLycPhla1	Eukaryota	Metazoa	Arthropoda	Insecta	Lepidoptera	Lycaenidae	Lycaena	Lycaena phlaeas
ilLymMona1	Eukaryota	Metazoa	Arthropoda	Insecta	Lepidoptera	Erebidae	Lymantria	Lymantria monacha
ilLysBell1	Eukaryota	Metazoa	Arthropoda	Insecta	Lepidoptera	Lycaenidae	Lysandra	Lysandra bellargus
ilLysCori1	Eukaryota	Metazoa	Arthropoda	Insecta	Lepidoptera	Lycaenidae	Lysandra	Lysandra coridon
ilMacNota1	Eukaryota	Metazoa	Arthropoda	Insecta	Lepidoptera	Geometridae	Macaria	Macaria notata
ilMamBras1	Eukaryota	Metazoa	Arthropoda	Insecta	Lepidoptera	Noctuidae	Mamestra	Mamestra brassicae
ilManJurt4	Eukaryota	Metazoa	Arthropoda	Insecta	Lepidoptera	Nymphalidae	Maniola	Maniola jurtina
ilManJurt1	Eukaryota	Metazoa	Arthropoda	Insecta	Lepidoptera	Nymphalidae	Maniola	Maniola jurtina
ilMarLuna1	Eukaryota	Metazoa	Arthropoda	Insecta	Lepidoptera	Pterophoridae	Marasmarcha	Marasmarcha lunaedactyla
ilMegAlbu1	Eukaryota	Metazoa	Arthropoda	Insecta	Lepidoptera	Nolidae	Meganola	Meganola albula
ilMelAtha1	Eukaryota	Metazoa	Arthropoda	Insecta	Lepidoptera	Nymphalidae	Melitaea	Mellicta athalia
ilMelCinx1	Eukaryota	Metazoa	Arthropoda	Insecta	Lepidoptera	Nymphalidae	Melitaea	Melitaea cinxia
ilMelGala2	Eukaryota	Metazoa	Arthropoda	Insecta	Lepidoptera	Nymphalidae	Melanargia	Melanargia galathea
ilMelPers1	Eukaryota	Metazoa	Arthropoda	Insecta	Lepidoptera	Noctuidae	Melanchra	Melanchra persicariae
ilMesFuru1	Eukaryota	Metazoa	Arthropoda	Insecta	Lepidoptera	Noctuidae	Mesoligia	Mesoligia furuncula
ilMicArun2	Eukaryota	Metazoa	Arthropoda	Insecta	Lepidoptera	Micropterigidae	Micropterix	Micropterix aruncella
ilMilMini2	Eukaryota	Metazoa	Arthropoda	Insecta	Lepidoptera	Erebidae	Miltochrista	Miltochrista miniata
ilMimTili1	Eukaryota	Metazoa	Arthropoda	Insecta	Lepidoptera	Sphingidae	Mimas	Mimas tiliae
ilMonLaev1	Eukaryota	Metazoa	Arthropoda	Insecta	Lepidoptera	Tineidae	Monopis	Monopis laevigella
ilMonLaev2	Eukaryota	Metazoa	Arthropoda	Insecta	Lepidoptera	Tineidae	Monopis	Monopis laevigella
ilMusNiti1	Eukaryota	Metazoa	Arthropoda	Insecta	Lepidoptera	Crambidae	Musotima	Musotima nitidalis
ilMytAlbi1	Eukaryota	Metazoa	Arthropoda	Insecta	Lepidoptera	Noctuidae	Mythimna	Mythimna albipuncta
ilMytFerr1	Eukaryota	Metazoa	Arthropoda	Insecta	Lepidoptera	Noctuidae	Mythimna	Mythimna ferrago
ilMytImpu1	Eukaryota	Metazoa	Arthropoda	Insecta	Lepidoptera	Noctuidae	Mythimna	Mythimna impura
ilNemSwae1	Eukaryota	Metazoa	Arthropoda	Insecta	Lepidoptera	Adelidae	Nematopogon	Nematopogon swammerdamellus
ilNocFimb1	Eukaryota	Metazoa	Arthropoda	Insecta	Lepidoptera	Noctuidae	Noctua	Noctua fimbriata
ilNocJant1	Eukaryota	Metazoa	Arthropoda	Insecta	Lepidoptera	Noctuidae	Noctua	Noctua janthe
ilNocPron1	Eukaryota	Metazoa	Arthropoda	Insecta	Lepidoptera	Noctuidae	Noctua	Noctua pronuba
ilNotDrom1	Eukaryota	Metazoa	Arthropoda	Insecta	Lepidoptera	Notodontidae	Notodonta	Notodonta dromedarius
ilNotUddm1	Eukaryota	Metazoa	Arthropoda	Insecta	Lepidoptera	Tortricidae	Notocelia	Notocelia uddmanniana
ilNotZicz1	Eukaryota	Metazoa	Arthropoda	Insecta	Lepidoptera	Notodontidae	Notodonta	Notodonta ziczac
ilNycReva1	Eukaryota	Metazoa	Arthropoda	Insecta	Lepidoptera	Nolidae	Nycteola	Nycteola revayana
ilNymNiti1	Eukaryota	Metazoa	Arthropoda	Insecta	Lepidoptera	Crambidae	Nymphula	Nymphula nitidulata
ilNymPoly1	Eukaryota	Metazoa	Arthropoda	Insecta	Lepidoptera	Nymphalidae	Nymphalis	Nymphalis polychloros
ilOchPlec1	Eukaryota	Metazoa	Arthropoda	Insecta	Lepidoptera	Noctuidae	Ochropleura	Ochropleura plecta
ilOchSylv3	Eukaryota	Metazoa	Arthropoda	Insecta	Lepidoptera	Hesperiidae	Ochlodes	Ochlodes sylvanus
ilOliLatr1	Eukaryota	Metazoa	Arthropoda	Insecta	Lepidoptera	Noctuidae	Oligia	Oligia latruncula
ilOmpLuno1	Eukaryota	Metazoa	Arthropoda	Insecta	Lepidoptera	Noctuidae	Omphaloscelis	Omphaloscelis lunosa
ilOpeBrum1	Eukaryota	Metazoa	Arthropoda	Insecta	Lepidoptera	Geometridae	Operophtera	Operophtera brumata
ilOpiLute1	Eukaryota	Metazoa	Arthropoda	Insecta	Lepidoptera	Geometridae	Opisthograptis	Opisthograptis luteolata
ilOrgAnti2	Eukaryota	Metazoa	Arthropoda	Insecta	Lepidoptera	Erebidae	Orgyia	Orgyia antiqua
ilOrgAnti1	Eukaryota	Metazoa	Arthropoda	Insecta	Lepidoptera	Erebidae	Orgyia	Orgyia antiqua
ilOrtGrac1	Eukaryota	Metazoa	Arthropoda	Insecta	Lepidoptera	Noctuidae	Orthosia	Orthosia gracilis
ilOrtInce1	Eukaryota	Metazoa	Arthropoda	Insecta	Lepidoptera	Noctuidae	Orthosia	Orthosia incerta
ilPamAuri1	Eukaryota	Metazoa	Arthropoda	Insecta	Lepidoptera	Tortricidae	Pammene	Pammene aurita
ilPamFasc1	Eukaryota	Metazoa	Arthropoda	Insecta	Lepidoptera	Tortricidae	Pammene	Pammene fasciana
ilPanCinn1	Eukaryota	Metazoa	Arthropoda	Insecta	Lepidoptera	Tortricidae	Pandemis	Pandemis cinnamomeana
ilPapMach1	Eukaryota	Metazoa	Arthropoda	Insecta	Lepidoptera	Papilionidae	Papilio	Papilio machaon
ilParAegt1	Eukaryota	Metazoa	Arthropoda	Insecta	Lepidoptera	Nymphalidae	Pararge	Pararge aegeria
ilParStra1	Eukaryota	Metazoa	Arthropoda	Insecta	Lepidoptera	Crambidae	Parapoynx	Parapoynx stratiotata
ilPerRhom1	Eukaryota	Metazoa	Arthropoda	Insecta	Lepidoptera	Geometridae	Peribatodes	Peribatodes rhomboidaria
ilPhaBuce1	Eukaryota	Metazoa	Arthropoda	Insecta	Lepidoptera	Notodontidae	Phalera	Phalera bucephala
ilPheGnom1	Eukaryota	Metazoa	Arthropoda	Insecta	Lepidoptera	Notodontidae	Pheosia	Pheosia gnoma
ilPheTrem1	Eukaryota	Metazoa	Arthropoda	Insecta	Lepidoptera	Notodontidae	Pheosia	Pheosia tremula
ilPhiVetu1	Eukaryota	Metazoa	Arthropoda	Insecta	Lepidoptera	Geometridae	Philereme	Philereme vetulata
ilPhlMeti2	Eukaryota	Metazoa	Arthropoda	Insecta	Lepidoptera	Noctuidae	Phlogophora	Phlogophora meticulosa
ilPhrFuli1	Eukaryota	Metazoa	Arthropoda	Insecta	Lepidoptera	Erebidae	Phragmatobia	Phragmatobia fuliginosa
ilPieBrab1	Eukaryota	Metazoa	Arthropoda	Insecta	Lepidoptera	Pieridae	Pieris	Pieris brassicae
ilPieNapi1	Eukaryota	Metazoa	Arthropoda	Insecta	Lepidoptera	Pieridae	Pieris	Pieris napi
ilPieNapi4	Eukaryota	Metazoa	Arthropoda	Insecta	Lepidoptera	Pieridae	Pieris	Pieris napi
ilPieRapa1	Eukaryota	Metazoa	Arthropoda	Insecta	Lepidoptera	Pieridae	Pieris	Pieris rapae
ilPleArgu1	Eukaryota	Metazoa	Arthropoda	Insecta	Lepidoptera	Lycaenidae	Plebejus	Plebejus argus
ilPluXylo3	Eukaryota	Metazoa	Arthropoda	Insecta	Lepidoptera	Plutellidae	Plutella	Plutella xylostella
ilPolIcar1	Eukaryota	Metazoa	Arthropoda	Insecta	Lepidoptera	Lycaenidae	Polyommatus	Polyommatus icarus
ilPolLich1	Eukaryota	Metazoa	Arthropoda	Insecta	Lepidoptera	Noctuidae	Polymixis	Polymixis lichenea
ilProPyga1	Eukaryota	Metazoa	Arthropoda	Insecta	Lepidoptera	Noctuidae	Protodeltote	Protodeltote pygarga
ilPtiCapc1	Eukaryota	Metazoa	Arthropoda	Insecta	Lepidoptera	Notodontidae	Ptilodon	Ptilodon capucinus
ilPyrFari1	Eukaryota	Metazoa	Arthropoda	Insecta	Lepidoptera	Pyralidae	Pyralis	Pyralis farinalis
ilPyrMalv3	Eukaryota	Metazoa	Arthropoda	Insecta	Lepidoptera	Hesperiidae	Pyrgus	Pyrgus malvae
ilSatPavo1	Eukaryota	Metazoa	Arthropoda	Insecta	Lepidoptera	Saturniidae	Saturnia	Saturnia pavonia
ilSchCost1	Eukaryota	Metazoa	Arthropoda	Insecta	Lepidoptera	Erebidae	Schrankia	Schrankia costaestrigalis
ilSelDent1	Eukaryota	Metazoa	Arthropoda	Insecta	Lepidoptera	Geometridae	Selenia	Selenia dentaria
ilSesApif2	Eukaryota	Metazoa	Arthropoda	Insecta	Lepidoptera	Sesiidae	Sesia	Sesia apiformis
ilSesBemb1	Eukaryota	Metazoa	Arthropoda	Insecta	Lepidoptera	Sesiidae	Sesia	Sesia bembeciformis
ilShaVerb5	Eukaryota	Metazoa	Arthropoda	Insecta	Lepidoptera	Noctuidae	Cucullia	Shargacucullia verbasci
ilSphPina1	Eukaryota	Metazoa	Arthropoda	Insecta	Lepidoptera	Sphingidae	Sphinx	Sphinx pinastri
ilSpiLubr1	Eukaryota	Metazoa	Arthropoda	Insecta	Lepidoptera	Erebidae	Spilosoma	Spilosoma lubricipeda
ilSpiLutu1	Eukaryota	Metazoa	Arthropoda	Insecta	Lepidoptera	Erebidae	Spilarctia	Spilarctia lutea
ilSteBipu1	Eukaryota	Metazoa	Arthropoda	Insecta	Lepidoptera	Pterophoridae	Stenoptilia	Stenoptilia bipunctidactyla
ilSynAndr1	Eukaryota	Metazoa	Arthropoda	Insecta	Lepidoptera	Sesiidae	Synanthedon	Synanthedon andrenaeformis
ilSynForm1	Eukaryota	Metazoa	Arthropoda	Insecta	Lepidoptera	Sesiidae	Synanthedon	Synanthedon formicaeformis
ilSynMyop1	Eukaryota	Metazoa	Arthropoda	Insecta	Lepidoptera	Sesiidae	Synanthedon	Synanthedon myopaeformis
ilSynTipu2	Eukaryota	Metazoa	Arthropoda	Insecta	Lepidoptera	Sesiidae	Synanthedon	Synanthedon tipuliformis
ilSynVesp1	Eukaryota	Metazoa	Arthropoda	Insecta	Lepidoptera	Sesiidae	Synanthedon	Synanthedon vespiformis
ilTelLucu1	Eukaryota	Metazoa	Arthropoda	Insecta	Lepidoptera	Gelechiidae	Teleiodes	Teleiodes luculella
ilThaMatu1	Eukaryota	Metazoa	Arthropoda	Insecta	Lepidoptera	Noctuidae	Thalpophila	Thalpophila matura
ilTheBrit1	Eukaryota	Metazoa	Arthropoda	Insecta	Lepidoptera	Geometridae	Thera	Thera britannica
ilTheObel3	Eukaryota	Metazoa	Arthropoda	Insecta	Lepidoptera	Geometridae	Thera	Thera obeliscata
ilThoDeci1	Eukaryota	Metazoa	Arthropoda	Insecta	Lepidoptera	Noctuidae	Tholera	Tholera decimalis
ilThuSene1	Eukaryota	Metazoa	Arthropoda	Insecta	Lepidoptera	Erebidae	Thumatha	Thumatha senex
ilThyBati1	Eukaryota	Metazoa	Arthropoda	Insecta	Lepidoptera	Drepanidae	Thyatira	Thyatira batis
ilThySylv1	Eukaryota	Metazoa	Arthropoda	Insecta	Lepidoptera	Hesperiidae	Thymelicus	Thymelicus sylvestris
ilTilAura1	Eukaryota	Metazoa	Arthropoda	Insecta	Lepidoptera	Noctuidae	Tiliacea	Tiliacea aurago
ilTinPell1	Eukaryota	Metazoa	Arthropoda	Insecta	Lepidoptera	Tineidae	Tinea	Tinea pellionella
ilTinSemi1	Eukaryota	Metazoa	Arthropoda	Insecta	Lepidoptera	Tineidae	Tinea	Tinea semifulvella
ilTinTrin1	Eukaryota	Metazoa	Arthropoda	Insecta	Lepidoptera	Tineidae	Tinea	Tinea trinotella
ilTorAlte1	Eukaryota	Metazoa	Arthropoda	Insecta	Lepidoptera	Tortricidae	Tortricodes	Tortricodes alternella
ilTriEmor1	Eukaryota	Metazoa	Arthropoda	Insecta	Lepidoptera	Noctuidae	Trisateles	Trisateles emortualis
ilTyrJaco4	Eukaryota	Metazoa	Arthropoda	Insecta	Lepidoptera	Erebidae	Tyria	Tyria jacobaeae
ilUdeOliv2	Eukaryota	Metazoa	Arthropoda	Insecta	Lepidoptera	Crambidae	Udea	Udea olivalis
ilVanAtal1	Eukaryota	Metazoa	Arthropoda	Insecta	Lepidoptera	Nymphalidae	Vanessa	Vanessa atalanta
ilVanCard2	Eukaryota	Metazoa	Arthropoda	Insecta	Lepidoptera	Nymphalidae	Vanessa	Vanessa cardui
ilWatBina1	Eukaryota	Metazoa	Arthropoda	Insecta	Lepidoptera	Drepanidae	Watsonalla	Watsonalla binaria
ilXanIcte2	Eukaryota	Metazoa	Arthropoda	Insecta	Lepidoptera	Noctuidae	Xanthia	Xanthia icteritia
ilXanSpad1	Eukaryota	Metazoa	Arthropoda	Insecta	Lepidoptera	Geometridae	Xanthorhoe	Xanthorhoe spadicearia
ilXesCnig1	Eukaryota	Metazoa	Arthropoda	Insecta	Lepidoptera	Noctuidae	Xestia	Xestia c-nigrum
ilXesSexs1	Eukaryota	Metazoa	Arthropoda	Insecta	Lepidoptera	Noctuidae	Xestia	Xestia sexstrigata
ilXesXant1	Eukaryota	Metazoa	Arthropoda	Insecta	Lepidoptera	Noctuidae	Xestia	Xestia xanthographa
ilXylAreo1	Eukaryota	Metazoa	Arthropoda	Insecta	Lepidoptera	Noctuidae	Xylocampa	Xylocampa areola
ilYpoCagn5	Eukaryota	Metazoa	Arthropoda	Insecta	Lepidoptera	Yponomeutidae	Yponomeuta	Yponomeuta cagnagella
ilYpoCagn1	Eukaryota	Metazoa	Arthropoda	Insecta	Lepidoptera	Yponomeutidae	Yponomeuta	Yponomeuta cagnagella
ilYpoPade1	Eukaryota	Metazoa	Arthropoda	Insecta	Lepidoptera	Yponomeutidae	Yponomeuta	Yponomeuta padella
ilYpoPade2	Eukaryota	Metazoa	Arthropoda	Insecta	Lepidoptera	Yponomeutidae	Yponomeuta	Yponomeuta padella
ilYpoPlub1	Eukaryota	Metazoa	Arthropoda	Insecta	Lepidoptera	Yponomeutidae	Yponomeuta	Yponomeuta plumbellus
ilYpoRore1	Eukaryota	Metazoa	Arthropoda	Insecta	Lepidoptera	Yponomeutidae	Yponomeuta	Yponomeuta malinellus
ilYpoSedl1	Eukaryota	Metazoa	Arthropoda	Insecta	Lepidoptera	Yponomeutidae	Yponomeuta	Yponomeuta sedellus
ilYpsScab1	Eukaryota	Metazoa	Arthropoda	Insecta	Lepidoptera	Ypsolophidae	Ypsolopha	Ypsolopha scabrella
ilYpsSequ2	Eukaryota	Metazoa	Arthropoda	Insecta	Lepidoptera	Ypsolophidae	Ypsolopha	Ypsolopha sequella
ilZeuPyri1	Eukaryota	Metazoa	Arthropoda	Insecta	Lepidoptera	Cossidae	Zeuzera	Zeuzera pyrina
ilZygFili1	Eukaryota	Metazoa	Arthropoda	Insecta	Lepidoptera	Zygaenidae	Zygaena	Zygaena filipendulae
inChrCarn1	Eukaryota	Metazoa	Arthropoda	Insecta	Neuroptera	Chrysopidae	Chrysoperla	Chrysoperla carnea
ioIscEleg1	Eukaryota	Metazoa	Arthropoda	Insecta	Odonata	Coenagrionidae	Ischnura	Ischnura elegans
ioPlaPenn1	Eukaryota	Metazoa	Arthropoda	Insecta	Odonata	Platycnemididae	Platycnemis	Platycnemis pennipes
ioSymStri1	Eukaryota	Metazoa	Arthropoda	Insecta	Odonata	Libellulidae	Sympetrum	Sympetrum striolatum
ipIsoGram3	Eukaryota	Metazoa	Arthropoda	Insecta	Plecoptera	Perlodidae	Isoperla	Isoperla grammatica
ipLeuNigr2	Eukaryota	Metazoa	Arthropoda	Insecta	Plecoptera	Leuctridae	Leuctra	Leuctra nigra
ipNemDubi1	Eukaryota	Metazoa	Arthropoda	Insecta	Plecoptera	Nemouridae	Nemoura	Nemoura dubitans
ipNemPict2	Eukaryota	Metazoa	Arthropoda	Insecta	Plecoptera	Nemouridae	Nemurella	Nemurella pictetii
ipProMont4	Eukaryota	Metazoa	Arthropoda	Insecta	Plecoptera	Nemouridae	Protonemura	Protonemura montana
iyAllPice1	Eukaryota	Metazoa	Arthropoda	Insecta	Hymenoptera	Ichneumonidae	Alloplasta	Alloplasta piceator
iyAmbArma2	Eukaryota	Metazoa	Arthropoda	Insecta	Hymenoptera	Ichneumonidae	Amblyteles	Amblyteles armatorius
iyAncNigr1	Eukaryota	Metazoa	Arthropoda	Insecta	Hymenoptera	Vespidae	Ancistrocerus	Ancistrocerus nigricornis
iyAndBuce1	Eukaryota	Metazoa	Arthropoda	Insecta	Hymenoptera	Andrenidae	Andrena	Andrena bucephala
iyAndDors1	Eukaryota	Metazoa	Arthropoda	Insecta	Hymenoptera	Andrenidae	Andrena	Andrena dorsata
iyAndFulv1	Eukaryota	Metazoa	Arthropoda	Insecta	Hymenoptera	Andrenidae	Andrena	Andrena fulva
iyAndHaem1	Eukaryota	Metazoa	Arthropoda	Insecta	Hymenoptera	Andrenidae	Andrena	Andrena haemorrhoa
iyAndHatt1	Eukaryota	Metazoa	Arthropoda	Insecta	Hymenoptera	Andrenidae	Andrena	Andrena hattorfiana
iyAndMinu1	Eukaryota	Metazoa	Arthropoda	Insecta	Hymenoptera	Andrenidae	Andrena	Andrena minutula
iyAnoNige1	Eukaryota	Metazoa	Arthropoda	Insecta	Hymenoptera	Pompilidae	Anoplius	Anoplius nigerrimus
iyAthRosa2	Eukaryota	Metazoa	Arthropoda	Insecta	Hymenoptera	Tenthredinidae	Athalia	Athalia rosae
iyAthRosa1	Eukaryota	Metazoa	Arthropoda	Insecta	Hymenoptera	Tenthredinidae	Athalia	Athalia rosae
iyBomCamp1	Eukaryota	Metazoa	Arthropoda	Insecta	Hymenoptera	Apidae	Bombus	Bombus campestris
iyBomHort1	Eukaryota	Metazoa	Arthropoda	Insecta	Hymenoptera	Apidae	Bombus	Bombus hortorum
iyBomHypn1	Eukaryota	Metazoa	Arthropoda	Insecta	Hymenoptera	Apidae	Bombus	Bombus hypnorum
iyBomPasc1	Eukaryota	Metazoa	Arthropoda	Insecta	Hymenoptera	Apidae	Bombus	Bombus pascuorum
iyBomPrat1	Eukaryota	Metazoa	Arthropoda	Insecta	Hymenoptera	Apidae	Bombus	Bombus pratorum
iyBomSyle1	Eukaryota	Metazoa	Arthropoda	Insecta	Hymenoptera	Apidae	Bombus	Bombus sylvestris
iyBomTerr1	Eukaryota	Metazoa	Arthropoda	Insecta	Hymenoptera	Apidae	Bombus	Bombus terrestris
iyBuaLabo1	Eukaryota	Metazoa	Arthropoda	Insecta	Hymenoptera	Ichneumonidae	Buathra	Buathra laborator
iyCamRapt1	Eukaryota	Metazoa	Arthropoda	Insecta	Hymenoptera	Ichneumonidae	Campoletis	Campoletis raptor
iyCerRyby1	Eukaryota	Metazoa	Arthropoda	Insecta	Hymenoptera	Crabronidae	Cerceris	Cerceris rybyensis
iyCliInci1	Eukaryota	Metazoa	Arthropoda	Insecta	Hymenoptera	Ichneumonidae	Clistopyga	Clistopyga incitator
iyCoeConi1	Eukaryota	Metazoa	Arthropoda	Insecta	Hymenoptera	Megachilidae	Coelioxys	Coelioxys conoideus
iyDolMedi1	Eukaryota	Metazoa	Arthropoda	Insecta	Hymenoptera	Vespidae	Dolichovespula	Dolichovespula media
iyDolSaxo1	Eukaryota	Metazoa	Arthropoda	Insecta	Hymenoptera	Vespidae	Dolichovespula	Dolichovespula saxonica
iyDolSylv1	Eukaryota	Metazoa	Arthropoda	Insecta	Hymenoptera	Vespidae	Dolichovespula	Dolichovespula sylvestris
iyEctCont1	Eukaryota	Metazoa	Arthropoda	Insecta	Hymenoptera	Crabronidae	Ectemnius	Ectemnius continuus
iyEctLitu1	Eukaryota	Metazoa	Arthropoda	Insecta	Hymenoptera	Crabronidae	Ectemnius	Ectemnius lituratus
iyIchXant1	Eukaryota	Metazoa	Arthropoda	Insecta	Hymenoptera	Ichneumonidae	Ichneumon	Ichneumon xanthorius
iyLasLatv2	Eukaryota	Metazoa	Arthropoda	Insecta	Hymenoptera	Halictidae	Lasioglossum	Lasioglossum lativentre
iyLasMori1	Eukaryota	Metazoa	Arthropoda	Insecta	Hymenoptera	Halictidae	Lasioglossum	Lasioglossum morio
iyLasPaux1	Eukaryota	Metazoa	Arthropoda	Insecta	Hymenoptera	Halictidae	Lasioglossum	Lasioglossum pauxillum
iyMacEuro1	Eukaryota	Metazoa	Arthropoda	Insecta	Hymenoptera	Melittidae	Macropis	Macropis europaea
iyMegLign1	Eukaryota	Metazoa	Arthropoda	Insecta	Hymenoptera	Megachilidae	Megachile	Megachile ligniseca
iyMegWill1	Eukaryota	Metazoa	Arthropoda	Insecta	Hymenoptera	Megachilidae	Megachile	Megachile willughbiella
iyMimDahl1	Eukaryota	Metazoa	Arthropoda	Insecta	Hymenoptera	Crabronidae	Mimumesa	Mimumesa dahlbomi
iyNetDila1	Eukaryota	Metazoa	Arthropoda	Insecta	Hymenoptera	Ichneumonidae	Netelia	Netelia fuscicornis
iyNomFabr1	Eukaryota	Metazoa	Arthropoda	Insecta	Hymenoptera	Apidae	Nomada	Nomada fabriciana
iyNomFuca1	Eukaryota	Metazoa	Arthropoda	Insecta	Hymenoptera	Apidae	Nomada	Nomada fucata
iyNysSpin1	Eukaryota	Metazoa	Arthropoda	Insecta	Hymenoptera	Crabronidae	Nysson	Nysson spinosus
iyOphLute1	Eukaryota	Metazoa	Arthropoda	Insecta	Hymenoptera	Ichneumonidae	Ophion	Ophion slaviceki
iyPemLugu1	Eukaryota	Metazoa	Arthropoda	Insecta	Hymenoptera	Crabronidae	Pemphredon	Pemphredon lugubris
iyRhoChlo1	Eukaryota	Metazoa	Arthropoda	Insecta	Hymenoptera	Tenthredinidae	Rhogogaster	Rhogogaster chlorosoma
iySelTumu1	Eukaryota	Metazoa	Arthropoda	Insecta	Hymenoptera	Halictidae	Seladonia	Seladonia tumulorum
iySphMoni1	Eukaryota	Metazoa	Arthropoda	Insecta	Hymenoptera	Halictidae	Sphecodes	Sphecodes monilicornis
iyStePhae1	Eukaryota	Metazoa	Arthropoda	Insecta	Hymenoptera	Megachilidae	Stelis	Stelis phaeoptera
iyTenDist1	Eukaryota	Metazoa	Arthropoda	Insecta	Hymenoptera	Tenthredinidae	Tenthredo	Tenthredo distinguenda
iyTenMeso1	Eukaryota	Metazoa	Arthropoda	Insecta	Hymenoptera	Tenthredinidae	Tenthredo	Tenthredo mesomela
iyTenNoth1	Eukaryota	Metazoa	Arthropoda	Insecta	Hymenoptera	Tenthredinidae	Tenthredo	Tenthredo notha
iyTipFemo1	Eukaryota	Metazoa	Arthropoda	Insecta	Hymenoptera	Tiphiidae	Tiphia	Tiphia femorata
iyVesCrab1	Eukaryota	Metazoa	Arthropoda	Insecta	Hymenoptera	Vespidae	Vespa	Vespa crabro
iyVesGerm1	Eukaryota	Metazoa	Arthropoda	Insecta	Hymenoptera	Vespidae	Vespula	Vespula germanica
iyVesVulg2	Eukaryota	Metazoa	Arthropoda	Insecta	Hymenoptera	Vespidae	Vespula	Vespula vulgaris
iyVesVulg3	Eukaryota	Metazoa	Arthropoda	Insecta	Hymenoptera	Vespidae	Vespula	Vespula vulgaris
iyVesVulg5	Eukaryota	Metazoa	Arthropoda	Insecta	Hymenoptera	Vespidae	Vespula	Vespula vulgaris
iyVesVulg1	Eukaryota	Metazoa	Arthropoda	Insecta	Hymenoptera	Vespidae	Vespula	Vespula vulgaris
jaDiaLine6	Eukaryota	Metazoa	Cnidaria	Anthozoa	Actiniaria	Diadumenidae	Diadumene	Diadumene lineata
jaMetSeni4	Eukaryota	Metazoa	Cnidaria	Anthozoa	Actiniaria	Metridiidae	Metridium	Metridium senile
jaNemVect1	Eukaryota	Metazoa	Cnidaria	Anthozoa	Actiniaria	Edwardsiidae	Nematostella	Nematostella vectensis
jhCanCock6	Eukaryota	Metazoa	Cnidaria	Hydrozoa	Anthoathecata	Candelabridae	Candelabrum	Candelabrum cocksii
jrHalOcto1	Eukaryota	Metazoa	Cnidaria	Staurozoa	Stauromedusae	Kishinouyeidae	Haliclystus	Haliclystus octoradiatus
kaAplTurb1	Eukaryota	Metazoa	Chordata	Ascidiacea	Aplousobranchia	Polyclinidae	Aplidium	Aplidium turbinatum
kaAscMent1	Eukaryota	Metazoa	Chordata	Ascidiacea	Phlebobranchia	Ascidiidae	Ascidia	Ascidia mentula
kaClaLepa1	Eukaryota	Metazoa	Chordata	Ascidiacea	Aplousobranchia	Clavelinidae	Clavelina	Clavelina lepadiformis
kcLamFluv1	Eukaryota	Metazoa	Chordata	Hyperoartia	Petromyzontiformes	Petromyzontidae	Lampetra	Lampetra fluviatilis
kmMyxGlut1	Eukaryota	Metazoa	Chordata	Myxini	Myxiniformes	Myxinidae	Myxine	Myxine glutinosa
laTriPals1	Eukaryota	Viridiplantae	Streptophyta	Magnoliopsida	Alismatales	Juncaginaceae	Triglochin	Triglochin palustris
lpBroSter1	Eukaryota	Viridiplantae	Streptophyta	Magnoliopsida	Poales	Poaceae	Bromus	Bromus sterilis
lpCarAren1	Eukaryota	Viridiplantae	Streptophyta	Magnoliopsida	Poales	Cyperaceae	Carex	Carex arenaria
lpCarDepa1	Eukaryota	Viridiplantae	Streptophyta	Magnoliopsida	Poales	Cyperaceae	Carex	Carex depauperata
lpCarDivu1	Eukaryota	Viridiplantae	Streptophyta	Magnoliopsida	Poales	Cyperaceae	Carex	Carex divulsa
lpCarPend1	Eukaryota	Viridiplantae	Streptophyta	Magnoliopsida	Poales	Cyperaceae	Carex	Carex pendula
lpCarRost1	Eukaryota	Viridiplantae	Streptophyta	Magnoliopsida	Poales	Cyperaceae	Carex	Carex rostrata
lpCarSylv1	Eukaryota	Viridiplantae	Streptophyta	Magnoliopsida	Poales	Cyperaceae	Carex	Carex sylvatica
lpJunEffu1	Eukaryota	Viridiplantae	Streptophyta	Magnoliopsida	Poales	Juncaceae	Juncus	Juncus effusus
lpLuzSylv1	Eukaryota	Viridiplantae	Streptophyta	Magnoliopsida	Poales	Juncaceae	Luzula	Luzula sylvatica
lpPhrAust1	Eukaryota	Viridiplantae	Streptophyta	Magnoliopsida	Poales	Poaceae	Phragmites	Phragmites australis
lpSchLacu1	Eukaryota	Viridiplantae	Streptophyta	Magnoliopsida	Poales	Cyperaceae	Schoenoplectus	Schoenoplectus lacustris
lpSchTriq1	Eukaryota	Viridiplantae	Streptophyta	Magnoliopsida	Poales	Cyperaceae	Schoenoplectus	Schoenoplectus triqueter
mApoSyl1	Eukaryota	Metazoa	Chordata	Mammalia	Rodentia	Muridae	Apodemus	Apodemus sylvaticus
mCanLor1	Eukaryota	Metazoa	Chordata	Mammalia	Carnivora	Canidae	Canis	Canis lupus
mCerEla1	Eukaryota	Metazoa	Chordata	Mammalia	Artiodactyla	Cervidae	Cervus	Cervus elaphus
mDelDel1	Eukaryota	Metazoa	Chordata	Mammalia	Artiodactyla	Delphinidae	Delphinus	Delphinus delphis
mEptNil1	Eukaryota	Metazoa	Chordata	Mammalia	Chiroptera	Vespertilionidae	Eptesicus	Eptesicus nilssonii
mGloMel1	Eukaryota	Metazoa	Chordata	Mammalia	Artiodactyla	Delphinidae	Globicephala	Globicephala melas
mHypAmp2	Eukaryota	Metazoa	Chordata	Mammalia	Artiodactyla	Ziphiidae	Hyperoodon	Hyperoodon ampullatus
mLagAlb1	Eukaryota	Metazoa	Chordata	Mammalia	Artiodactyla	Delphinidae	Lagenorhynchus	Lagenorhynchus albirostris
mMarMar1	Eukaryota	Metazoa	Chordata	Mammalia	Carnivora	Mustelidae	Martes	Martes martes
mMelMel3	Eukaryota	Metazoa	Chordata	Mammalia	Carnivora	Mustelidae	Meles	Meles meles
mMicMin1	Eukaryota	Metazoa	Chordata	Mammalia	Rodentia	Muridae	Micromys	Micromys minutus
mMunRee1	Eukaryota	Metazoa	Chordata	Mammalia	Artiodactyla	Cervidae	Muntiacus	Muntiacus reevesi
mMusMuc1	Eukaryota	Metazoa	Chordata	Mammalia	Rodentia	Muridae	Mus	Mus musculus
mOrcOrc1	Eukaryota	Metazoa	Chordata	Mammalia	Artiodactyla	Delphinidae	Orcinus	Orcinus orca
mPhoPho1	Eukaryota	Metazoa	Chordata	Mammalia	Artiodactyla	Phocoenidae	Phocoena	Phocoena phocoena
mPipPyg2	Eukaryota	Metazoa	Chordata	Mammalia	Chiroptera	Vespertilionidae	Pipistrellus	Pipistrellus pygmaeus
mPleAur1	Eukaryota	Metazoa	Chordata	Mammalia	Chiroptera	Vespertilionidae	Plecotus	Plecotus auritus
mSteCoe1	Eukaryota	Metazoa	Chordata	Mammalia	Artiodactyla	Delphinidae	Stenella	Stenella coeruleoalba
paTetJugo1	Eukaryota	.	Heterolobosea	.	.	Vahlkampfiidae	Tetramitus	Tetramitus jugosus
pxEimPrae1	Eukaryota	.	Apicomplexa	Conoidasida	Eucoccidiorida	Eimeriidae	Eimeria	Eimeria praecox
qcStrAcum1	Eukaryota	Metazoa	Arthropoda	Chilopoda	Geophilomorpha	Linotaeniidae	Strigamia	Strigamia acuminata
qhLepNord3	Eukaryota	Metazoa	Arthropoda	Hexanauplia	Siphonostomatoida	Caligidae	Lepeophtheirus	Lepeophtheirus nordmannii
qqAmaFero1	Eukaryota	Metazoa	Arthropoda	Arachnida	Araneae	Amaurobiidae	Amaurobius	Amaurobius ferox
qqArgBrue1	Eukaryota	Metazoa	Arthropoda	Arachnida	Araneae	Araneidae	Argiope	Argiope bruennichi
qqMetBour1	Eukaryota	Metazoa	Arthropoda	Arachnida	Araneae	Tetragnathidae	Meta	Meta bourneti
qqMetSegm1	Eukaryota	Metazoa	Arthropoda	Arachnida	Araneae	Tetragnathidae	Metellina	Metellina segmentata
qqOdiSpin1	Eukaryota	Metazoa	Arthropoda	Arachnida	Opiliones	Phalangiidae	Odiellus	Odiellus spinosus
qqParLuna2	Eukaryota	Metazoa	Arthropoda	Arachnida	Araneae	Theridiidae	Parasteatoda	Parasteatoda lunata
qqTetMont2	Eukaryota	Metazoa	Arthropoda	Arachnida	Araneae	Tetragnathidae	Tetragnatha	Tetragnatha montana
qxSacCarc1	Eukaryota	Metazoa	Arthropoda	Thecostraca	.	Sacculinidae	Sacculina	Sacculina carcini
rZooViv1	Eukaryota	Metazoa	Chordata	Lepidosauria	Squamata	Lacertidae	Zootoca	Zootoca vivipara
sRajBra1	Eukaryota	Metazoa	Chordata	Chondrichthyes	Rajiformes	Rajidae	Raja	Raja brachyura
tnLinLong1	Eukaryota	Metazoa	Nemertea	Pilidiophora	Heteronemertea	Lineidae	Lineus	Lineus longissimus
tzBugNeri2	Eukaryota	Metazoa	Bryozoa	Gymnolaemata	Cheilostomatida	Bugulidae	Bugula	Bugula neritina
tzBugStol2	Eukaryota	Metazoa	Bryozoa	Gymnolaemata	Cheilostomatida	Bugulidae	Bugulina	Bugulina stolonifera
tzCryPall5	Eukaryota	Metazoa	Bryozoa	Gymnolaemata	Cheilostomatida	Cryptosulidae	Cryptosula	Cryptosula pallasiana
tzMemMemb1	Eukaryota	Metazoa	Bryozoa	Gymnolaemata	Cheilostomatida	Membraniporidae	Membranipora	Membranipora membranacea
tzWatSuba1	Eukaryota	Metazoa	Bryozoa	Gymnolaemata	Cheilostomatida	Watersiporidae	Watersipora	Watersipora subatra
ucDunPrim2	Eukaryota	Viridiplantae	Chlorophyta	Chlorophyceae	Chlamydomonadales	Dunaliellaceae	Dunaliella	Dunaliella primolecta
ucMarCocc1	Eukaryota	Viridiplantae	Chlorophyta	Trebouxiophyceae	Chlorellales	Chlorellaceae	Marvania	Marvania coccoides
ucPycProv1	Eukaryota	Viridiplantae	Chlorophyta	Pseudoscourfieldiophyceae	Pseudoscourfieldiales	Pycnococcaceae	Pycnococcus	Pycnococcus provasolii
wcApoIcte1	Eukaryota	Metazoa	Annelida	Clitellata	Crassiclitellata	Lumbricidae	Aporrectodea	Aporrectodea icterica
wcLumRube1	Eukaryota	Metazoa	Annelida	Clitellata	Crassiclitellata	Lumbricidae	Lumbricus	Lumbricus rubellus
wcLumTerr1	Eukaryota	Metazoa	Annelida	Clitellata	Crassiclitellata	Lumbricidae	Lumbricus	Lumbricus terrestris
wdMagJohn1	Eukaryota	Metazoa	Annelida	Polychaeta	Spionida	Magelonidae	Magelona	Magelona johnstoni
wkErpOcto2	Eukaryota	Metazoa	Annelida	Clitellata	Hirudinida	Erpobdellidae	Erpobdella	Erpobdella octoculata
wpAchSqua1	Eukaryota	Metazoa	Annelida	Polychaeta	Phyllodocida	Polynoidae	Acholoe	Acholoe squamosa
wpAleGela1	Eukaryota	Metazoa	Annelida	Polychaeta	Phyllodocida	Polynoidae	Alentia	Alentia gelatinosa
wpAliVire1	Eukaryota	Metazoa	Annelida	Polychaeta	Phyllodocida	Nereididae	Alitta	Alitta virens
wpHarImpa5	Eukaryota	Metazoa	Annelida	Polychaeta	Phyllodocida	Polynoidae	Harmothoe	Harmothoe impar
wpSthLimi1	Eukaryota	Metazoa	Annelida	Polychaeta	Phyllodocida	Sigalionidae	Sthenelais	Sthenelais limicola
wrPisGeom1	Eukaryota	Metazoa	Annelida	Clitellata	Hirudinida	Piscicolidae	Piscicola	Piscicola geometra
wtTerLapi1	Eukaryota	Metazoa	Annelida	Polychaeta	Terebellida	Terebellidae	Terebella	Terebella lapidaria
xbArcSenh1	Eukaryota	Metazoa	Mollusca	Bivalvia	Mytilida	Mytilidae	Arcuatula	Arcuatula senhousia
xbAzoCham1	Eukaryota	Metazoa	Mollusca	Bivalvia	Cardiida	Solecurtidae	Azorinus	Azorinus chamasolen
xbCerEdul1	Eukaryota	Metazoa	Mollusca	Bivalvia	Cardiida	Cardiidae	Cerastoderma	Cerastoderma edule
xbGarTell2	Eukaryota	Metazoa	Mollusca	Bivalvia	Cardiida	Psammobiidae	Gari	Gari tellinella
xbLutLutr1	Eukaryota	Metazoa	Mollusca	Bivalvia	Venerida	Mactridae	Lutraria	Lutraria lutraria
xbMagGiga1	Eukaryota	Metazoa	Mollusca	Bivalvia	Ostreida	Ostreidae	Magallana	Magallana gigas
xbMimVari1	Eukaryota	Metazoa	Mollusca	Bivalvia	Pectinida	Pectinidae	Mimachlamys	Mimachlamys varia
xbMytEdul2	Eukaryota	Metazoa	Mollusca	Bivalvia	Mytilida	Mytilidae	Mytilus	Mytilus edulis
xbOstEdul1	Eukaryota	Metazoa	Mollusca	Bivalvia	Ostreida	Ostreidae	Ostrea	Ostrea edulis
xbSpiSoli1	Eukaryota	Metazoa	Mollusca	Bivalvia	Venerida	Mactridae	Spisula	Spisula solida
xbSpiSubt1	Eukaryota	Metazoa	Mollusca	Bivalvia	Venerida	Mactridae	Spisula	Spisula subtruncata
xgAniVort1	Eukaryota	Metazoa	Mollusca	Gastropoda	.	Planorbidae	Anisus	Anisus vortex
xgGibMagu1	Eukaryota	Metazoa	Mollusca	Gastropoda	Trochida	Trochidae	Gibbula	Gibbula magus
xgOncCelt3	Eukaryota	Metazoa	Mollusca	Gastropoda	Systellommatophora	Onchidiidae	Onchidella	Onchidella celtica
xgPatDepr1	Eukaryota	Metazoa	Mollusca	Gastropoda	.	Patellidae	Patella	Patella depressa
xgPatPell1	Eukaryota	Metazoa	Mollusca	Gastropoda	.	Patellidae	Patella	Patella pellucida
xgPatUlys2	Eukaryota	Metazoa	Mollusca	Gastropoda	.	Patellidae	Patella	Patella ulyssiponensis
xgPatVulg1	Eukaryota	Metazoa	Mollusca	Gastropoda	.	Patellidae	Patella	Patella vulgata
PHORD0020b	Eukaryota	Metazoa	Mollusca	Gastropoda	Trochida	Trochidae	Phorcus	Phorcus lineatus
PHORD0021b	Eukaryota	Metazoa	Mollusca	Gastropoda	Trochida	Trochidae	Phorcus	Phorcus lineatus
PHORD0023b	Eukaryota	Metazoa	Mollusca	Gastropoda	Trochida	Trochidae	Phorcus	Phorcus lineatus
PHORD0024b	Eukaryota	Metazoa	Mollusca	Gastropoda	Trochida	Trochidae	Phorcus	Phorcus lineatus
PHORD0030b	Eukaryota	Metazoa	Mollusca	Gastropoda	Trochida	Trochidae	Phorcus	Phorcus lineatus
PHORD0031b	Eukaryota	Metazoa	Mollusca	Gastropoda	Trochida	Trochidae	Phorcus	Phorcus lineatus
PHORD0034b	Eukaryota	Metazoa	Mollusca	Gastropoda	Trochida	Trochidae	Phorcus	Phorcus lineatus
PHORD0038b	Eukaryota	Metazoa	Mollusca	Gastropoda	Trochida	Trochidae	Phorcus	Phorcus lineatus
PHORD0051b	Eukaryota	Metazoa	Mollusca	Gastropoda	Trochida	Trochidae	Phorcus	Phorcus lineatus
PHORD0058b	Eukaryota	Metazoa	Mollusca	Gastropoda	Trochida	Trochidae	Phorcus	Phorcus lineatus
PHORD0060b	Eukaryota	Metazoa	Mollusca	Gastropoda	Trochida	Trochidae	Phorcus	Phorcus lineatus
xgPhoLine1	Eukaryota	Metazoa	Mollusca	Gastropoda	Trochida	Trochidae	Phorcus	Phorcus lineatus
xgPhoLine2	Eukaryota	Metazoa	Mollusca	Gastropoda	Trochida	Trochidae	Phorcus	Phorcus lineatus
xgSteCine2	Eukaryota	Metazoa	Mollusca	Gastropoda	Trochida	Trochidae	Steromphala	Steromphala cineraria
xpLepCine2	Eukaryota	Metazoa	Mollusca	Polyplacophora	Chitonida	Tonicellidae	Lepidochitona	Lepidochitona cinerea

## Sheet: Table 8
Supplementary Table 8. Adjusted SBS96 counts for DToL samples with biological replicates
Substitution	Trinucleotide	SBS96	Normalised count	Sample	Species
C>A	ACA	A[C>A]A	46.7271	icAdaBipu1	Adalia bipunctata
C>A	ACC	A[C>A]C	24.8288	icAdaBipu1	Adalia bipunctata
C>A	ACG	A[C>A]G	25.2979	icAdaBipu1	Adalia bipunctata
C>A	ACT	A[C>A]T	37.0358	icAdaBipu1	Adalia bipunctata
C>G	ACA	A[C>G]A	13.0401	icAdaBipu1	Adalia bipunctata
C>G	ACC	A[C>G]C	6.47709	icAdaBipu1	Adalia bipunctata
C>G	ACG	A[C>G]G	5.49954	icAdaBipu1	Adalia bipunctata
C>G	ACT	A[C>G]T	9.80358	icAdaBipu1	Adalia bipunctata
C>T	ACA	A[C>T]A	54.3338	icAdaBipu1	Adalia bipunctata
C>T	ACC	A[C>T]C	50.7372	icAdaBipu1	Adalia bipunctata
C>T	ACG	A[C>T]G	30.7974	icAdaBipu1	Adalia bipunctata
C>T	ACT	A[C>T]T	37.0358	icAdaBipu1	Adalia bipunctata
T>A	ATA	A[T>A]A	53.1369	icAdaBipu1	Adalia bipunctata
T>A	ATC	A[T>A]C	28.7025	icAdaBipu1	Adalia bipunctata
T>A	ATG	A[T>A]G	39.6612	icAdaBipu1	Adalia bipunctata
T>A	ATT	A[T>A]T	150.169	icAdaBipu1	Adalia bipunctata
T>C	ATA	A[T>C]A	47.2328	icAdaBipu1	Adalia bipunctata
T>C	ATC	A[T>C]C	20.0917	icAdaBipu1	Adalia bipunctata
T>C	ATG	A[T>C]G	31.729	icAdaBipu1	Adalia bipunctata
T>C	ATT	A[T>C]T	71.9989	icAdaBipu1	Adalia bipunctata
T>G	ATA	A[T>G]A	37.3926	icAdaBipu1	Adalia bipunctata
T>G	ATC	A[T>G]C	23.9187	icAdaBipu1	Adalia bipunctata
T>G	ATG	A[T>G]G	22.8052	icAdaBipu1	Adalia bipunctata
T>G	ATT	A[T>G]T	62.7419	icAdaBipu1	Adalia bipunctata
C>A	CCA	C[C>A]A	28.0991	icAdaBipu1	Adalia bipunctata
C>A	CCC	C[C>A]C	16.3198	icAdaBipu1	Adalia bipunctata
C>A	CCG	C[C>A]G	17.6103	icAdaBipu1	Adalia bipunctata
C>A	CCT	C[C>A]T	20.53	icAdaBipu1	Adalia bipunctata
C>G	CCA	C[C>G]A	21.6147	icAdaBipu1	Adalia bipunctata
C>G	CCC	C[C>G]C	4.29467	icAdaBipu1	Adalia bipunctata
C>G	CCG	C[C>G]G	10.359	icAdaBipu1	Adalia bipunctata
C>G	CCT	C[C>G]T	5.40264	icAdaBipu1	Adalia bipunctata
C>T	CCA	C[C>T]A	30.2606	icAdaBipu1	Adalia bipunctata
C>T	CCC	C[C>T]C	40.3699	icAdaBipu1	Adalia bipunctata
C>T	CCG	C[C>T]G	25.8976	icAdaBipu1	Adalia bipunctata
C>T	CCT	C[C>T]T	30.2548	icAdaBipu1	Adalia bipunctata
T>A	CTA	C[T>A]A	22.7475	icAdaBipu1	Adalia bipunctata
T>A	CTC	C[T>A]C	16.5889	icAdaBipu1	Adalia bipunctata
T>A	CTG	C[T>A]G	11.3499	icAdaBipu1	Adalia bipunctata
T>A	CTT	C[T>A]T	23.5128	icAdaBipu1	Adalia bipunctata
T>C	CTA	C[T>C]A	16.1128	icAdaBipu1	Adalia bipunctata
T>C	CTC	C[T>C]C	35.9426	icAdaBipu1	Adalia bipunctata
T>C	CTG	C[T>C]G	17.0249	icAdaBipu1	Adalia bipunctata
T>C	CTT	C[T>C]T	72.5829	icAdaBipu1	Adalia bipunctata
T>G	CTA	C[T>G]A	27.4866	icAdaBipu1	Adalia bipunctata
T>G	CTC	C[T>G]C	13.8241	icAdaBipu1	Adalia bipunctata
T>G	CTG	C[T>G]G	13.2416	icAdaBipu1	Adalia bipunctata
T>G	CTT	C[T>G]T	14.3121	icAdaBipu1	Adalia bipunctata
C>A	GCA	G[C>A]A	15.1485	icAdaBipu1	Adalia bipunctata
C>A	GCC	G[C>A]C	13.8422	icAdaBipu1	Adalia bipunctata
C>A	GCG	G[C>A]G	10.6807	icAdaBipu1	Adalia bipunctata
C>A	GCT	G[C>A]T	17.3598	icAdaBipu1	Adalia bipunctata
C>G	GCA	G[C>G]A	10.8204	icAdaBipu1	Adalia bipunctata
C>G	GCC	G[C>G]C	12.7774	icAdaBipu1	Adalia bipunctata
C>G	GCG	G[C>G]G	9.61267	icAdaBipu1	Adalia bipunctata
C>G	GCT	G[C>G]T	9.76488	icAdaBipu1	Adalia bipunctata
C>T	GCA	G[C>T]A	25.9689	icAdaBipu1	Adalia bipunctata
C>T	GCC	G[C>T]C	25.5548	icAdaBipu1	Adalia bipunctata
C>T	GCG	G[C>T]G	19.2253	icAdaBipu1	Adalia bipunctata
C>T	GCT	G[C>T]T	29.2946	icAdaBipu1	Adalia bipunctata
T>A	GTA	G[T>A]A	24.2247	icAdaBipu1	Adalia bipunctata
T>A	GTC	G[T>A]C	6.53919	icAdaBipu1	Adalia bipunctata
T>A	GTG	G[T>A]G	11.6736	icAdaBipu1	Adalia bipunctata
T>A	GTT	G[T>A]T	19.3667	icAdaBipu1	Adalia bipunctata
T>C	GTA	G[T>C]A	38.7596	icAdaBipu1	Adalia bipunctata
T>C	GTC	G[T>C]C	21.4859	icAdaBipu1	Adalia bipunctata
T>C	GTG	G[T>C]G	12.6464	icAdaBipu1	Adalia bipunctata
T>C	GTT	G[T>C]T	27.5212	icAdaBipu1	Adalia bipunctata
T>G	GTA	G[T>G]A	14.5348	icAdaBipu1	Adalia bipunctata
T>G	GTC	G[T>G]C	13.0784	icAdaBipu1	Adalia bipunctata
T>G	GTG	G[T>G]G	13.6192	icAdaBipu1	Adalia bipunctata
T>G	GTT	G[T>G]T	22.4246	icAdaBipu1	Adalia bipunctata
C>A	TCA	T[C>A]A	68.4588	icAdaBipu1	Adalia bipunctata
C>A	TCC	T[C>A]C	25.7237	icAdaBipu1	Adalia bipunctata
C>A	TCG	T[C>A]G	36.7174	icAdaBipu1	Adalia bipunctata
C>A	TCT	T[C>A]T	55.5759	icAdaBipu1	Adalia bipunctata
C>G	TCA	T[C>G]A	23.1707	icAdaBipu1	Adalia bipunctata
C>G	TCC	T[C>G]C	11.79	icAdaBipu1	Adalia bipunctata
C>G	TCG	T[C>G]G	12.5888	icAdaBipu1	Adalia bipunctata
C>G	TCT	T[C>G]T	22.8842	icAdaBipu1	Adalia bipunctata
C>T	TCA	T[C>T]A	144.29	icAdaBipu1	Adalia bipunctata
C>T	TCC	T[C>T]C	76.0994	icAdaBipu1	Adalia bipunctata
C>T	TCG	T[C>T]G	63.9932	icAdaBipu1	Adalia bipunctata
C>T	TCT	T[C>T]T	90.4471	icAdaBipu1	Adalia bipunctata
T>A	TTA	T[T>A]A	95.4002	icAdaBipu1	Adalia bipunctata
T>A	TTC	T[T>A]C	18.9968	icAdaBipu1	Adalia bipunctata
T>A	TTG	T[T>A]G	24.0077	icAdaBipu1	Adalia bipunctata
T>A	TTT	T[T>A]T	35.323	icAdaBipu1	Adalia bipunctata
T>C	TTA	T[T>C]A	149.628	icAdaBipu1	Adalia bipunctata
T>C	TTC	T[T>C]C	77.9869	icAdaBipu1	Adalia bipunctata
T>C	TTG	T[T>C]G	78.0249	icAdaBipu1	Adalia bipunctata
T>C	TTT	T[T>C]T	185.446	icAdaBipu1	Adalia bipunctata
T>G	TTA	T[T>G]A	49.2064	icAdaBipu1	Adalia bipunctata
T>G	TTC	T[T>G]C	28.9951	icAdaBipu1	Adalia bipunctata
T>G	TTG	T[T>G]G	34.0109	icAdaBipu1	Adalia bipunctata
T>G	TTT	T[T>G]T	44.1537	icAdaBipu1	Adalia bipunctata
C>A	ACA	A[C>A]A	47.4401	icAdaBipu15	Adalia bipunctata
C>A	ACC	A[C>A]C	17.3449	icAdaBipu15	Adalia bipunctata
C>A	ACG	A[C>A]G	23.5788	icAdaBipu15	Adalia bipunctata
C>A	ACT	A[C>A]T	25.8927	icAdaBipu15	Adalia bipunctata
C>G	ACA	A[C>G]A	22.0651	icAdaBipu15	Adalia bipunctata
C>G	ACC	A[C>G]C	14.284	icAdaBipu15	Adalia bipunctata
C>G	ACG	A[C>G]G	11.228	icAdaBipu15	Adalia bipunctata
C>G	ACT	A[C>G]T	11.8675	icAdaBipu15	Adalia bipunctata
C>T	ACA	A[C>T]A	77.228	icAdaBipu15	Adalia bipunctata
C>T	ACC	A[C>T]C	30.6086	icAdaBipu15	Adalia bipunctata
C>T	ACG	A[C>T]G	30.3156	icAdaBipu15	Adalia bipunctata
C>T	ACT	A[C>T]T	43.1545	icAdaBipu15	Adalia bipunctata
T>A	ATA	A[T>A]A	87.3242	icAdaBipu15	Adalia bipunctata
T>A	ATC	A[T>A]C	18.8645	icAdaBipu15	Adalia bipunctata
T>A	ATG	A[T>A]G	33.8159	icAdaBipu15	Adalia bipunctata
T>A	ATT	A[T>A]T	88.0478	icAdaBipu15	Adalia bipunctata
T>C	ATA	A[T>C]A	52.8007	icAdaBipu15	Adalia bipunctata
T>C	ATC	A[T>C]C	29.7861	icAdaBipu15	Adalia bipunctata
T>C	ATG	A[T>C]G	28.6923	icAdaBipu15	Adalia bipunctata
T>C	ATT	A[T>C]T	43.0669	icAdaBipu15	Adalia bipunctata
T>G	ATA	A[T>G]A	17.2618	icAdaBipu15	Adalia bipunctata
T>G	ATC	A[T>G]C	8.93583	icAdaBipu15	Adalia bipunctata
T>G	ATG	A[T>G]G	14.3461	icAdaBipu15	Adalia bipunctata
T>G	ATT	A[T>G]T	29.6683	icAdaBipu15	Adalia bipunctata
C>A	CCA	C[C>A]A	31.6548	icAdaBipu15	Adalia bipunctata
C>A	CCC	C[C>A]C	11.9432	icAdaBipu15	Adalia bipunctata
C>A	CCG	C[C>A]G	9.61611	icAdaBipu15	Adalia bipunctata
C>A	CCT	C[C>A]T	21.9013	icAdaBipu15	Adalia bipunctata
C>G	CCA	C[C>G]A	8.16897	icAdaBipu15	Adalia bipunctata
C>G	CCC	C[C>G]C	2.75613	icAdaBipu15	Adalia bipunctata
C>G	CCG	C[C>G]G	21.1554	icAdaBipu15	Adalia bipunctata
C>G	CCT	C[C>G]T	3.12876	icAdaBipu15	Adalia bipunctata
C>T	CCA	C[C>T]A	34.7181	icAdaBipu15	Adalia bipunctata
C>T	CCC	C[C>T]C	33.0736	icAdaBipu15	Adalia bipunctata
C>T	CCG	C[C>T]G	26.9251	icAdaBipu15	Adalia bipunctata
C>T	CCT	C[C>T]T	40.6739	icAdaBipu15	Adalia bipunctata
T>A	CTA	C[T>A]A	28.9546	icAdaBipu15	Adalia bipunctata
T>A	CTC	C[T>A]C	17.2236	icAdaBipu15	Adalia bipunctata
T>A	CTG	C[T>A]G	10.9634	icAdaBipu15	Adalia bipunctata
T>A	CTT	C[T>A]T	17.6615	icAdaBipu15	Adalia bipunctata
T>C	CTA	C[T>C]A	28.9546	icAdaBipu15	Adalia bipunctata
T>C	CTC	C[T>C]C	21.051	icAdaBipu15	Adalia bipunctata
T>C	CTG	C[T>C]G	20.9301	icAdaBipu15	Adalia bipunctata
T>C	CTT	C[T>C]T	63.3736	icAdaBipu15	Adalia bipunctata
T>G	CTA	C[T>G]A	8.98591	icAdaBipu15	Adalia bipunctata
T>G	CTC	C[T>G]C	8.61179	icAdaBipu15	Adalia bipunctata
T>G	CTG	C[T>G]G	11.9601	icAdaBipu15	Adalia bipunctata
T>G	CTT	C[T>G]T	16.6226	icAdaBipu15	Adalia bipunctata
C>A	GCA	G[C>A]A	24.5952	icAdaBipu15	Adalia bipunctata
C>A	GCC	G[C>A]C	6.13512	icAdaBipu15	Adalia bipunctata
C>A	GCG	G[C>A]G	9.89021	icAdaBipu15	Adalia bipunctata
C>A	GCT	G[C>A]T	6.54782	icAdaBipu15	Adalia bipunctata
C>G	GCA	G[C>G]A	4.47186	icAdaBipu15	Adalia bipunctata
C>G	GCC	G[C>G]C	6.13512	icAdaBipu15	Adalia bipunctata
C>G	GCG	G[C>G]G	6.59347	icAdaBipu15	Adalia bipunctata
C>G	GCT	G[C>G]T	6.54782	icAdaBipu15	Adalia bipunctata
C>T	GCA	G[C>T]A	32.421	icAdaBipu15	Adalia bipunctata
C>T	GCC	G[C>T]C	21.4729	icAdaBipu15	Adalia bipunctata
C>T	GCG	G[C>T]G	27.4728	icAdaBipu15	Adalia bipunctata
C>T	GCT	G[C>T]T	20.7348	icAdaBipu15	Adalia bipunctata
T>A	GTA	G[T>A]A	33.1945	icAdaBipu15	Adalia bipunctata
T>A	GTC	G[T>A]C	3.87051	icAdaBipu15	Adalia bipunctata
T>A	GTG	G[T>A]G	12.2904	icAdaBipu15	Adalia bipunctata
T>A	GTT	G[T>A]T	11.7489	icAdaBipu15	Adalia bipunctata
T>C	GTA	G[T>C]A	17.1002	icAdaBipu15	Adalia bipunctata
T>C	GTC	G[T>C]C	14.5144	icAdaBipu15	Adalia bipunctata
T>C	GTG	G[T>C]G	15.363	icAdaBipu15	Adalia bipunctata
T>C	GTT	G[T>C]T	25.456	icAdaBipu15	Adalia bipunctata
T>G	GTA	G[T>G]A	8.04715	icAdaBipu15	Adalia bipunctata
T>G	GTC	G[T>G]C	11.6115	icAdaBipu15	Adalia bipunctata
T>G	GTG	G[T>G]G	9.21779	icAdaBipu15	Adalia bipunctata
T>G	GTT	G[T>G]T	23.4979	icAdaBipu15	Adalia bipunctata
C>A	TCA	T[C>A]A	47.8532	icAdaBipu15	Adalia bipunctata
C>A	TCC	T[C>A]C	10.0448	icAdaBipu15	Adalia bipunctata
C>A	TCG	T[C>A]G	10.1327	icAdaBipu15	Adalia bipunctata
C>A	TCT	T[C>A]T	29.254	icAdaBipu15	Adalia bipunctata
C>G	TCA	T[C>G]A	23.9266	icAdaBipu15	Adalia bipunctata
C>G	TCC	T[C>G]C	10.0448	icAdaBipu15	Adalia bipunctata
C>G	TCG	T[C>G]G	10.1327	icAdaBipu15	Adalia bipunctata
C>G	TCT	T[C>G]T	13.0018	icAdaBipu15	Adalia bipunctata
C>T	TCA	T[C>T]A	93.6259	icAdaBipu15	Adalia bipunctata
C>T	TCC	T[C>T]C	58.2597	icAdaBipu15	Adalia bipunctata
C>T	TCG	T[C>T]G	47.6236	icAdaBipu15	Adalia bipunctata
C>T	TCT	T[C>T]T	80.1777	icAdaBipu15	Adalia bipunctata
T>A	TTA	T[T>A]A	70.4728	icAdaBipu15	Adalia bipunctata
T>A	TTC	T[T>A]C	19.2428	icAdaBipu15	Adalia bipunctata
T>A	TTG	T[T>A]G	13.5348	icAdaBipu15	Adalia bipunctata
T>A	TTT	T[T>A]T	45.1486	icAdaBipu15	Adalia bipunctata
T>C	TTA	T[T>C]A	106.192	icAdaBipu15	Adalia bipunctata
T>C	TTC	T[T>C]C	50.9934	icAdaBipu15	Adalia bipunctata
T>C	TTG	T[T>C]G	51.2388	icAdaBipu15	Adalia bipunctata
T>C	TTT	T[T>C]T	79.2405	icAdaBipu15	Adalia bipunctata
T>G	TTA	T[T>G]A	31.8576	icAdaBipu15	Adalia bipunctata
T>G	TTC	T[T>G]C	12.5078	icAdaBipu15	Adalia bipunctata
T>G	TTG	T[T>G]G	26.1028	icAdaBipu15	Adalia bipunctata
T>G	TTT	T[T>G]T	34.0918	icAdaBipu15	Adalia bipunctata
C>A	ACA	A[C>A]A	267.024	icAdaBipu20	Adalia bipunctata
C>A	ACC	A[C>A]C	140.901	icAdaBipu20	Adalia bipunctata
C>A	ACG	A[C>A]G	156.226	icAdaBipu20	Adalia bipunctata
C>A	ACT	A[C>A]T	205.736	icAdaBipu20	Adalia bipunctata
C>G	ACA	A[C>G]A	134.071	icAdaBipu20	Adalia bipunctata
C>G	ACC	A[C>G]C	39.3693	icAdaBipu20	Adalia bipunctata
C>G	ACG	A[C>G]G	79.8486	icAdaBipu20	Adalia bipunctata
C>G	ACT	A[C>G]T	99.0173	icAdaBipu20	Adalia bipunctata
C>T	ACA	A[C>T]A	501.648	icAdaBipu20	Adalia bipunctata
C>T	ACC	A[C>T]C	243.468	icAdaBipu20	Adalia bipunctata
C>T	ACG	A[C>T]G	239.546	icAdaBipu20	Adalia bipunctata
C>T	ACT	A[C>T]T	326.757	icAdaBipu20	Adalia bipunctata
T>A	ATA	A[T>A]A	291.76	icAdaBipu20	Adalia bipunctata
T>A	ATC	A[T>A]C	100.095	icAdaBipu20	Adalia bipunctata
T>A	ATG	A[T>A]G	128.073	icAdaBipu20	Adalia bipunctata
T>A	ATT	A[T>A]T	368.944	icAdaBipu20	Adalia bipunctata
T>C	ATA	A[T>C]A	329.729	icAdaBipu20	Adalia bipunctata
T>C	ATC	A[T>C]C	174.675	icAdaBipu20	Adalia bipunctata
T>C	ATG	A[T>C]G	167.714	icAdaBipu20	Adalia bipunctata
T>C	ATT	A[T>C]T	273.038	icAdaBipu20	Adalia bipunctata
T>G	ATA	A[T>G]A	101.916	icAdaBipu20	Adalia bipunctata
T>G	ATC	A[T>G]C	51.0287	icAdaBipu20	Adalia bipunctata
T>G	ATG	A[T>G]G	82.3323	icAdaBipu20	Adalia bipunctata
T>G	ATT	A[T>G]T	123.307	icAdaBipu20	Adalia bipunctata
C>A	CCA	C[C>A]A	150.702	icAdaBipu20	Adalia bipunctata
C>A	CCC	C[C>A]C	61.8016	icAdaBipu20	Adalia bipunctata
C>A	CCG	C[C>A]G	56.2971	icAdaBipu20	Adalia bipunctata
C>A	CCT	C[C>A]T	88.0411	icAdaBipu20	Adalia bipunctata
C>G	CCA	C[C>G]A	73.7921	icAdaBipu20	Adalia bipunctata
C>G	CCC	C[C>G]C	30.9008	icAdaBipu20	Adalia bipunctata
C>G	CCG	C[C>G]G	48.3958	icAdaBipu20	Adalia bipunctata
C>G	CCT	C[C>G]T	44.0205	icAdaBipu20	Adalia bipunctata
C>T	CCA	C[C>T]A	210.983	icAdaBipu20	Adalia bipunctata
C>T	CCC	C[C>T]C	180.107	icAdaBipu20	Adalia bipunctata
C>T	CCG	C[C>T]G	170.867	icAdaBipu20	Adalia bipunctata
C>T	CCT	C[C>T]T	240.017	icAdaBipu20	Adalia bipunctata
T>A	CTA	C[T>A]A	115.117	icAdaBipu20	Adalia bipunctata
T>A	CTC	C[T>A]C	88.4852	icAdaBipu20	Adalia bipunctata
T>A	CTG	C[T>A]G	77.0883	icAdaBipu20	Adalia bipunctata
T>A	CTT	C[T>A]T	129.721	icAdaBipu20	Adalia bipunctata
T>C	CTA	C[T>C]A	231.202	icAdaBipu20	Adalia bipunctata
T>C	CTC	C[T>C]C	155.32	icAdaBipu20	Adalia bipunctata
T>C	CTG	C[T>C]G	149.298	icAdaBipu20	Adalia bipunctata
T>C	CTT	C[T>C]T	235.763	icAdaBipu20	Adalia bipunctata
T>G	CTA	C[T>G]A	53.2055	icAdaBipu20	Adalia bipunctata
T>G	CTC	C[T>G]C	54.5972	icAdaBipu20	Adalia bipunctata
T>G	CTG	C[T>G]G	87.8221	icAdaBipu20	Adalia bipunctata
T>G	CTT	C[T>G]T	86.4808	icAdaBipu20	Adalia bipunctata
C>A	GCA	G[C>A]A	139.271	icAdaBipu20	Adalia bipunctata
C>A	GCC	G[C>A]C	48.1955	icAdaBipu20	Adalia bipunctata
C>A	GCG	G[C>A]G	64.4349	icAdaBipu20	Adalia bipunctata
C>A	GCT	G[C>A]T	119.824	icAdaBipu20	Adalia bipunctata
C>G	GCA	G[C>G]A	62.2757	icAdaBipu20	Adalia bipunctata
C>G	GCC	G[C>G]C	37.9412	icAdaBipu20	Adalia bipunctata
C>G	GCG	G[C>G]G	24.4408	icAdaBipu20	Adalia bipunctata
C>G	GCT	G[C>G]T	45.4886	icAdaBipu20	Adalia bipunctata
C>T	GCA	G[C>T]A	215.134	icAdaBipu20	Adalia bipunctata
C>T	GCC	G[C>T]C	158.943	icAdaBipu20	Adalia bipunctata
C>T	GCG	G[C>T]G	143.312	icAdaBipu20	Adalia bipunctata
C>T	GCT	G[C>T]T	214.129	icAdaBipu20	Adalia bipunctata
T>A	GTA	G[T>A]A	102.962	icAdaBipu20	Adalia bipunctata
T>A	GTC	G[T>A]C	57.3948	icAdaBipu20	Adalia bipunctata
T>A	GTG	G[T>A]G	80.4319	icAdaBipu20	Adalia bipunctata
T>A	GTT	G[T>A]T	88.8004	icAdaBipu20	Adalia bipunctata
T>C	GTA	G[T>C]A	158.404	icAdaBipu20	Adalia bipunctata
T>C	GTC	G[T>C]C	127.225	icAdaBipu20	Adalia bipunctata
T>C	GTG	G[T>C]G	114.615	icAdaBipu20	Adalia bipunctata
T>C	GTT	G[T>C]T	115.441	icAdaBipu20	Adalia bipunctata
T>G	GTA	G[T>G]A	48.5111	icAdaBipu20	Adalia bipunctata
T>G	GTC	G[T>G]C	39.2198	icAdaBipu20	Adalia bipunctata
T>G	GTG	G[T>G]G	57.3077	icAdaBipu20	Adalia bipunctata
T>G	GTT	G[T>G]T	82.8804	icAdaBipu20	Adalia bipunctata
C>A	TCA	T[C>A]A	376.417	icAdaBipu20	Adalia bipunctata
C>A	TCC	T[C>A]C	107.454	icAdaBipu20	Adalia bipunctata
C>A	TCG	T[C>A]G	129.515	icAdaBipu20	Adalia bipunctata
C>A	TCT	T[C>A]T	268.929	icAdaBipu20	Adalia bipunctata
C>G	TCA	T[C>G]A	126.179	icAdaBipu20	Adalia bipunctata
C>G	TCC	T[C>G]C	50.145	icAdaBipu20	Adalia bipunctata
C>G	TCG	T[C>G]G	94.767	icAdaBipu20	Adalia bipunctata
C>G	TCT	T[C>G]T	144.893	icAdaBipu20	Adalia bipunctata
C>T	TCA	T[C>T]A	659.525	icAdaBipu20	Adalia bipunctata
C>T	TCC	T[C>T]C	426.744	icAdaBipu20	Adalia bipunctata
C>T	TCG	T[C>T]G	380.121	icAdaBipu20	Adalia bipunctata
C>T	TCT	T[C>T]T	429.189	icAdaBipu20	Adalia bipunctata
T>A	TTA	T[T>A]A	374.543	icAdaBipu20	Adalia bipunctata
T>A	TTC	T[T>A]C	96.5817	icAdaBipu20	Adalia bipunctata
T>A	TTG	T[T>A]G	97.9034	icAdaBipu20	Adalia bipunctata
T>A	TTT	T[T>A]T	234.625	icAdaBipu20	Adalia bipunctata
T>C	TTA	T[T>C]A	736.634	icAdaBipu20	Adalia bipunctata
T>C	TTC	T[T>C]C	336.573	icAdaBipu20	Adalia bipunctata
T>C	TTG	T[T>C]G	333.453	icAdaBipu20	Adalia bipunctata
T>C	TTT	T[T>C]T	419.427	icAdaBipu20	Adalia bipunctata
T>G	TTA	T[T>G]A	99.6228	icAdaBipu20	Adalia bipunctata
T>G	TTC	T[T>G]C	85.8504	icAdaBipu20	Adalia bipunctata
T>G	TTG	T[T>G]G	151.217	icAdaBipu20	Adalia bipunctata
T>G	TTT	T[T>G]T	245.496	icAdaBipu20	Adalia bipunctata
C>A	ACA	A[C>A]A	28.8928	icAdaBipu28	Adalia bipunctata
C>A	ACC	A[C>A]C	16.7546	icAdaBipu28	Adalia bipunctata
C>A	ACG	A[C>A]G	11.9971	icAdaBipu28	Adalia bipunctata
C>A	ACT	A[C>A]T	19.9436	icAdaBipu28	Adalia bipunctata
C>G	ACA	A[C>G]A	7.49073	icAdaBipu28	Adalia bipunctata
C>G	ACC	A[C>G]C	2.09433	icAdaBipu28	Adalia bipunctata
C>G	ACG	A[C>G]G	5.45321	icAdaBipu28	Adalia bipunctata
C>G	ACT	A[C>G]T	5.24831	icAdaBipu28	Adalia bipunctata
C>T	ACA	A[C>T]A	39.5939	icAdaBipu28	Adalia bipunctata
C>T	ACC	A[C>T]C	18.849	icAdaBipu28	Adalia bipunctata
C>T	ACG	A[C>T]G	19.6316	icAdaBipu28	Adalia bipunctata
C>T	ACT	A[C>T]T	37.7878	icAdaBipu28	Adalia bipunctata
T>A	ATA	A[T>A]A	28.0186	icAdaBipu28	Adalia bipunctata
T>A	ATC	A[T>A]C	8.7436	icAdaBipu28	Adalia bipunctata
T>A	ATG	A[T>A]G	7.05308	icAdaBipu28	Adalia bipunctata
T>A	ATT	A[T>A]T	34.483	icAdaBipu28	Adalia bipunctata
T>C	ATA	A[T>C]A	32.0212	icAdaBipu28	Adalia bipunctata
T>C	ATC	A[T>C]C	15.5442	icAdaBipu28	Adalia bipunctata
T>C	ATG	A[T>C]G	19.1441	icAdaBipu28	Adalia bipunctata
T>C	ATT	A[T>C]T	16.7489	icAdaBipu28	Adalia bipunctata
T>G	ATA	A[T>G]A	5.00332	icAdaBipu28	Adalia bipunctata
T>G	ATC	A[T>G]C	5.82907	icAdaBipu28	Adalia bipunctata
T>G	ATG	A[T>G]G	4.03033	icAdaBipu28	Adalia bipunctata
T>G	ATT	A[T>G]T	16.7489	icAdaBipu28	Adalia bipunctata
C>A	CCA	C[C>A]A	13.7359	icAdaBipu28	Adalia bipunctata
C>A	CCC	C[C>A]C	7.147	icAdaBipu28	Adalia bipunctata
C>A	CCG	C[C>A]G	7.97918	icAdaBipu28	Adalia bipunctata
C>A	CCT	C[C>A]T	6.46111	icAdaBipu28	Adalia bipunctata
C>G	CCA	C[C>G]A	1.05661	icAdaBipu28	Adalia bipunctata
C>G	CCC	C[C>G]C	2.68013	icAdaBipu28	Adalia bipunctata
C>G	CCG	C[C>G]G	7.97918	icAdaBipu28	Adalia bipunctata
C>G	CCT	C[C>G]T	3.23055	icAdaBipu28	Adalia bipunctata
C>T	CCA	C[C>T]A	28.5285	icAdaBipu28	Adalia bipunctata
C>T	CCC	C[C>T]C	15.1874	icAdaBipu28	Adalia bipunctata
C>T	CCG	C[C>T]G	10.9714	icAdaBipu28	Adalia bipunctata
C>T	CCT	C[C>T]T	31.2287	icAdaBipu28	Adalia bipunctata
T>A	CTA	C[T>A]A	12.7231	icAdaBipu28	Adalia bipunctata
T>A	CTC	C[T>A]C	9.34257	icAdaBipu28	Adalia bipunctata
T>A	CTG	C[T>A]G	1.94437	icAdaBipu28	Adalia bipunctata
T>A	CTT	C[T>A]T	11.6435	icAdaBipu28	Adalia bipunctata
T>C	CTA	C[T>C]A	19.5739	icAdaBipu28	Adalia bipunctata
T>C	CTC	C[T>C]C	15.8824	icAdaBipu28	Adalia bipunctata
T>C	CTG	C[T>C]G	9.72187	icAdaBipu28	Adalia bipunctata
T>C	CTT	C[T>C]T	31.7549	icAdaBipu28	Adalia bipunctata
T>G	CTA	C[T>G]A	8.80828	icAdaBipu28	Adalia bipunctata
T>G	CTC	C[T>G]C	11.2111	icAdaBipu28	Adalia bipunctata
T>G	CTG	C[T>G]G	6.80531	icAdaBipu28	Adalia bipunctata
T>G	CTT	C[T>G]T	7.40948	icAdaBipu28	Adalia bipunctata
C>A	GCA	G[C>A]A	15.2039	icAdaBipu28	Adalia bipunctata
C>A	GCC	G[C>A]C	4.24152	icAdaBipu28	Adalia bipunctata
C>A	GCG	G[C>A]G	4.27931	icAdaBipu28	Adalia bipunctata
C>A	GCT	G[C>A]T	9.56023	icAdaBipu28	Adalia bipunctata
C>G	GCA	G[C>G]A	6.51594	icAdaBipu28	Adalia bipunctata
C>G	GCC	G[C>G]C	1.06038	icAdaBipu28	Adalia bipunctata
C>G	GCG	G[C>G]G	2.13966	icAdaBipu28	Adalia bipunctata
C>G	GCT	G[C>G]T	5.31124	icAdaBipu28	Adalia bipunctata
C>T	GCA	G[C>T]A	23.8918	icAdaBipu28	Adalia bipunctata
C>T	GCC	G[C>T]C	22.268	icAdaBipu28	Adalia bipunctata
C>T	GCG	G[C>T]G	4.27931	icAdaBipu28	Adalia bipunctata
C>T	GCT	G[C>T]T	19.1205	icAdaBipu28	Adalia bipunctata
T>A	GTA	G[T>A]A	10.8732	icAdaBipu28	Adalia bipunctata
T>A	GTC	G[T>A]C	7.55082	icAdaBipu28	Adalia bipunctata
T>A	GTG	G[T>A]G	4.02046	icAdaBipu28	Adalia bipunctata
T>A	GTT	G[T>A]T	10.2969	icAdaBipu28	Adalia bipunctata
T>C	GTA	G[T>C]A	10.8732	icAdaBipu28	Adalia bipunctata
T>C	GTC	G[T>C]C	12.2701	icAdaBipu28	Adalia bipunctata
T>C	GTG	G[T>C]G	8.04092	icAdaBipu28	Adalia bipunctata
T>C	GTT	G[T>C]T	17.5048	icAdaBipu28	Adalia bipunctata
T>G	GTA	G[T>G]A	6.91931	icAdaBipu28	Adalia bipunctata
T>G	GTC	G[T>G]C	3.77541	icAdaBipu28	Adalia bipunctata
T>G	GTG	G[T>G]G	8.04092	icAdaBipu28	Adalia bipunctata
T>G	GTT	G[T>G]T	13.386	icAdaBipu28	Adalia bipunctata
C>A	TCA	T[C>A]A	35.5547	icAdaBipu28	Adalia bipunctata
C>A	TCC	T[C>A]C	14.6457	icAdaBipu28	Adalia bipunctata
C>A	TCG	T[C>A]G	17.7358	icAdaBipu28	Adalia bipunctata
C>A	TCT	T[C>A]T	15.9897	icAdaBipu28	Adalia bipunctata
C>G	TCA	T[C>G]A	10.1585	icAdaBipu28	Adalia bipunctata
C>G	TCC	T[C>G]C	5.23061	icAdaBipu28	Adalia bipunctata
C>G	TCG	T[C>G]G	1.97064	icAdaBipu28	Adalia bipunctata
C>G	TCT	T[C>G]T	11.7258	icAdaBipu28	Adalia bipunctata
C>T	TCA	T[C>T]A	62.9827	icAdaBipu28	Adalia bipunctata
C>T	TCC	T[C>T]C	34.522	icAdaBipu28	Adalia bipunctata
C>T	TCG	T[C>T]G	27.589	icAdaBipu28	Adalia bipunctata
C>T	TCT	T[C>T]T	62.8928	icAdaBipu28	Adalia bipunctata
T>A	TTA	T[T>A]A	27.8025	icAdaBipu28	Adalia bipunctata
T>A	TTC	T[T>A]C	9.97557	icAdaBipu28	Adalia bipunctata
T>A	TTG	T[T>A]G	6.97701	icAdaBipu28	Adalia bipunctata
T>A	TTT	T[T>A]T	18.0227	icAdaBipu28	Adalia bipunctata
T>C	TTA	T[T>C]A	66.5275	icAdaBipu28	Adalia bipunctata
T>C	TTC	T[T>C]C	25.9365	icAdaBipu28	Adalia bipunctata
T>C	TTG	T[T>C]G	29.9015	icAdaBipu28	Adalia bipunctata
T>C	TTT	T[T>C]T	44.1555	icAdaBipu28	Adalia bipunctata
T>G	TTA	T[T>G]A	12.9083	icAdaBipu28	Adalia bipunctata
T>G	TTC	T[T>G]C	9.97557	icAdaBipu28	Adalia bipunctata
T>G	TTG	T[T>G]G	8.97044	icAdaBipu28	Adalia bipunctata
T>G	TTT	T[T>G]T	21.6272	icAdaBipu28	Adalia bipunctata
C>A	ACA	A[C>A]A	23.971	icAdaBipu29	Adalia bipunctata
C>A	ACC	A[C>A]C	16.0253	icAdaBipu29	Adalia bipunctata
C>A	ACG	A[C>A]G	12.1367	icAdaBipu29	Adalia bipunctata
C>A	ACT	A[C>A]T	13.8981	icAdaBipu29	Adalia bipunctata
C>G	ACA	A[C>G]A	7.62714	icAdaBipu29	Adalia bipunctata
C>G	ACC	A[C>G]C	6.41013	icAdaBipu29	Adalia bipunctata
C>G	ACG	A[C>G]G	5.5167	icAdaBipu29	Adalia bipunctata
C>G	ACT	A[C>G]T	6.41451	icAdaBipu29	Adalia bipunctata
C>T	ACA	A[C>T]A	38.1357	icAdaBipu29	Adalia bipunctata
C>T	ACC	A[C>T]C	25.6405	icAdaBipu29	Adalia bipunctata
C>T	ACG	A[C>T]G	15.4468	icAdaBipu29	Adalia bipunctata
C>T	ACT	A[C>T]T	34.2107	icAdaBipu29	Adalia bipunctata
T>A	ATA	A[T>A]A	41.6963	icAdaBipu29	Adalia bipunctata
T>A	ATC	A[T>A]C	12.4626	icAdaBipu29	Adalia bipunctata
T>A	ATG	A[T>A]G	13.0494	icAdaBipu29	Adalia bipunctata
T>A	ATT	A[T>A]T	43.7668	icAdaBipu29	Adalia bipunctata
T>C	ATA	A[T>C]A	40.7035	icAdaBipu29	Adalia bipunctata
T>C	ATC	A[T>C]C	20.1319	icAdaBipu29	Adalia bipunctata
T>C	ATG	A[T>C]G	20.076	icAdaBipu29	Adalia bipunctata
T>C	ATT	A[T>C]T	39.788	icAdaBipu29	Adalia bipunctata
T>G	ATA	A[T>G]A	14.8915	icAdaBipu29	Adalia bipunctata
T>G	ATC	A[T>G]C	7.66929	icAdaBipu29	Adalia bipunctata
T>G	ATG	A[T>G]G	14.0532	icAdaBipu29	Adalia bipunctata
T>G	ATT	A[T>G]T	21.8834	icAdaBipu29	Adalia bipunctata
C>A	CCA	C[C>A]A	23.7109	icAdaBipu29	Adalia bipunctata
C>A	CCC	C[C>A]C	4.35424	icAdaBipu29	Adalia bipunctata
C>A	CCG	C[C>A]G	5.0612	icAdaBipu29	Adalia bipunctata
C>A	CCT	C[C>A]T	6.59061	icAdaBipu29	Adalia bipunctata
C>G	CCA	C[C>G]A	12.9332	icAdaBipu29	Adalia bipunctata
C>G	CCC	C[C>G]C	4.35424	icAdaBipu29	Adalia bipunctata
C>G	CCG	C[C>G]G	2.02448	icAdaBipu29	Adalia bipunctata
C>G	CCT	C[C>G]T	9.88592	icAdaBipu29	Adalia bipunctata
C>T	CCA	C[C>T]A	23.7109	icAdaBipu29	Adalia bipunctata
C>T	CCC	C[C>T]C	21.7712	icAdaBipu29	Adalia bipunctata
C>T	CCG	C[C>T]G	15.1836	icAdaBipu29	Adalia bipunctata
C>T	CCT	C[C>T]T	26.3624	icAdaBipu29	Adalia bipunctata
T>A	CTA	C[T>A]A	13.5025	icAdaBipu29	Adalia bipunctata
T>A	CTC	C[T>A]C	7.37651	icAdaBipu29	Adalia bipunctata
T>A	CTG	C[T>A]G	6.7515	icAdaBipu29	Adalia bipunctata
T>A	CTT	C[T>A]T	5.32982	icAdaBipu29	Adalia bipunctata
T>C	CTA	C[T>C]A	28.9339	icAdaBipu29	Adalia bipunctata
T>C	CTC	C[T>C]C	16.5972	icAdaBipu29	Adalia bipunctata
T>C	CTG	C[T>C]G	10.6095	icAdaBipu29	Adalia bipunctata
T>C	CTT	C[T>C]T	34.1108	icAdaBipu29	Adalia bipunctata
T>G	CTA	C[T>G]A	6.75124	icAdaBipu29	Adalia bipunctata
T>G	CTC	C[T>G]C	4.61032	icAdaBipu29	Adalia bipunctata
T>G	CTG	C[T>G]G	6.7515	icAdaBipu29	Adalia bipunctata
T>G	CTT	C[T>G]T	6.39578	icAdaBipu29	Adalia bipunctata
C>A	GCA	G[C>A]A	11.0037	icAdaBipu29	Adalia bipunctata
C>A	GCC	G[C>A]C	3.24237	icAdaBipu29	Adalia bipunctata
C>A	GCG	G[C>A]G	3.22065	icAdaBipu29	Adalia bipunctata
C>A	GCT	G[C>A]T	7.57719	icAdaBipu29	Adalia bipunctata
C>G	GCA	G[C>G]A	6.60222	icAdaBipu29	Adalia bipunctata
C>G	GCC	G[C>G]C	1.08079	icAdaBipu29	Adalia bipunctata
C>G	GCG	G[C>G]G	3.22065	icAdaBipu29	Adalia bipunctata
C>G	GCT	G[C>G]T	5.41228	icAdaBipu29	Adalia bipunctata
C>T	GCA	G[C>T]A	18.7063	icAdaBipu29	Adalia bipunctata
C>T	GCC	G[C>T]C	18.3735	icAdaBipu29	Adalia bipunctata
C>T	GCG	G[C>T]G	15.0297	icAdaBipu29	Adalia bipunctata
C>T	GCT	G[C>T]T	17.3193	icAdaBipu29	Adalia bipunctata
T>A	GTA	G[T>A]A	14.6788	icAdaBipu29	Adalia bipunctata
T>A	GTC	G[T>A]C	2.79707	icAdaBipu29	Adalia bipunctata
T>A	GTG	G[T>A]G	7.99377	icAdaBipu29	Adalia bipunctata
T>A	GTT	G[T>A]T	8.35872	icAdaBipu29	Adalia bipunctata
T>C	GTA	G[T>C]A	13.7002	icAdaBipu29	Adalia bipunctata
T>C	GTC	G[T>C]C	10.2559	icAdaBipu29	Adalia bipunctata
T>C	GTG	G[T>C]G	11.9907	icAdaBipu29	Adalia bipunctata
T>C	GTT	G[T>C]T	17.7623	icAdaBipu29	Adalia bipunctata
T>G	GTA	G[T>G]A	2.93576	icAdaBipu29	Adalia bipunctata
T>G	GTC	G[T>G]C	2.79707	icAdaBipu29	Adalia bipunctata
T>G	GTG	G[T>G]G	9.99221	icAdaBipu29	Adalia bipunctata
T>G	GTT	G[T>G]T	14.6278	icAdaBipu29	Adalia bipunctata
C>A	TCA	T[C>A]A	34.823	icAdaBipu29	Adalia bipunctata
C>A	TCC	T[C>A]C	20.1511	icAdaBipu29	Adalia bipunctata
C>A	TCG	T[C>A]G	13.8501	icAdaBipu29	Adalia bipunctata
C>A	TCT	T[C>A]T	22.7306	icAdaBipu29	Adalia bipunctata
C>G	TCA	T[C>G]A	16.3873	icAdaBipu29	Adalia bipunctata
C>G	TCC	T[C>G]C	4.24233	icAdaBipu29	Adalia bipunctata
C>G	TCG	T[C>G]G	12.8608	icAdaBipu29	Adalia bipunctata
C>G	TCT	T[C>G]T	9.74167	icAdaBipu29	Adalia bipunctata
C>T	TCA	T[C>T]A	67.5975	icAdaBipu29	Adalia bipunctata
C>T	TCC	T[C>T]C	45.605	icAdaBipu29	Adalia bipunctata
C>T	TCG	T[C>T]G	39.5718	icAdaBipu29	Adalia bipunctata
C>T	TCT	T[C>T]T	46.5435	icAdaBipu29	Adalia bipunctata
T>A	TTA	T[T>A]A	34.9519	icAdaBipu29	Adalia bipunctata
T>A	TTC	T[T>A]C	20.0193	icAdaBipu29	Adalia bipunctata
T>A	TTG	T[T>A]G	10.0235	icAdaBipu29	Adalia bipunctata
T>A	TTT	T[T>A]T	21.8508	icAdaBipu29	Adalia bipunctata
T>C	TTA	T[T>C]A	83.8847	icAdaBipu29	Adalia bipunctata
T>C	TTC	T[T>C]C	43.0415	icAdaBipu29	Adalia bipunctata
T>C	TTG	T[T>C]G	34.08	icAdaBipu29	Adalia bipunctata
T>C	TTT	T[T>C]T	51.5679	icAdaBipu29	Adalia bipunctata
T>G	TTA	T[T>G]A	23.967	icAdaBipu29	Adalia bipunctata
T>G	TTC	T[T>G]C	13.0125	icAdaBipu29	Adalia bipunctata
T>G	TTG	T[T>G]G	13.0306	icAdaBipu29	Adalia bipunctata
T>G	TTT	T[T>G]T	36.7094	icAdaBipu29	Adalia bipunctata
C>A	ACA	A[C>A]A	31.4246	icAdaBipu31	Adalia bipunctata
C>A	ACC	A[C>A]C	15.8648	icAdaBipu31	Adalia bipunctata
C>A	ACG	A[C>A]G	21.8831	icAdaBipu31	Adalia bipunctata
C>A	ACT	A[C>A]T	17.0597	icAdaBipu31	Adalia bipunctata
C>G	ACA	A[C>G]A	8.66885	icAdaBipu31	Adalia bipunctata
C>G	ACC	A[C>G]C	3.17297	icAdaBipu31	Adalia bipunctata
C>G	ACG	A[C>G]G	5.47079	icAdaBipu31	Adalia bipunctata
C>G	ACT	A[C>G]T	4.26492	icAdaBipu31	Adalia bipunctata
C>T	ACA	A[C>T]A	49.8459	icAdaBipu31	Adalia bipunctata
C>T	ACC	A[C>T]C	22.2108	icAdaBipu31	Adalia bipunctata
C>T	ACG	A[C>T]G	16.4124	icAdaBipu31	Adalia bipunctata
C>T	ACT	A[C>T]T	27.722	icAdaBipu31	Adalia bipunctata
T>A	ATA	A[T>A]A	55.751	icAdaBipu31	Adalia bipunctata
T>A	ATC	A[T>A]C	11.6134	icAdaBipu31	Adalia bipunctata
T>A	ATG	A[T>A]G	15.0734	icAdaBipu31	Adalia bipunctata
T>A	ATT	A[T>A]T	50.0678	icAdaBipu31	Adalia bipunctata
T>C	ATA	A[T>C]A	47.7866	icAdaBipu31	Adalia bipunctata
T>C	ATC	A[T>C]C	20.3235	icAdaBipu31	Adalia bipunctata
T>C	ATG	A[T>C]G	26.1273	icAdaBipu31	Adalia bipunctata
T>C	ATT	A[T>C]T	37.3055	icAdaBipu31	Adalia bipunctata
T>G	ATA	A[T>G]A	15.9289	icAdaBipu31	Adalia bipunctata
T>G	ATC	A[T>G]C	4.83893	icAdaBipu31	Adalia bipunctata
T>G	ATG	A[T>G]G	9.04406	icAdaBipu31	Adalia bipunctata
T>G	ATT	A[T>G]T	15.7076	icAdaBipu31	Adalia bipunctata
C>A	CCA	C[C>A]A	25.58	icAdaBipu31	Adalia bipunctata
C>A	CCC	C[C>A]C	10.6402	icAdaBipu31	Adalia bipunctata
C>A	CCG	C[C>A]G	11.0092	icAdaBipu31	Adalia bipunctata
C>A	CCT	C[C>A]T	11.9763	icAdaBipu31	Adalia bipunctata
C>G	CCA	C[C>G]A	9.59251	icAdaBipu31	Adalia bipunctata
C>G	CCC	C[C>G]C	3.54674	icAdaBipu31	Adalia bipunctata
C>G	CCG	C[C>G]G	11.0092	icAdaBipu31	Adalia bipunctata
C>G	CCT	C[C>G]T	7.62127	icAdaBipu31	Adalia bipunctata
C>T	CCA	C[C>T]A	37.3042	icAdaBipu31	Adalia bipunctata
C>T	CCC	C[C>T]C	21.2804	icAdaBipu31	Adalia bipunctata
C>T	CCG	C[C>T]G	18.0151	icAdaBipu31	Adalia bipunctata
C>T	CCT	C[C>T]T	29.3963	icAdaBipu31	Adalia bipunctata
T>A	CTA	C[T>A]A	16.5195	icAdaBipu31	Adalia bipunctata
T>A	CTC	C[T>A]C	6.52053	icAdaBipu31	Adalia bipunctata
T>A	CTG	C[T>A]G	7.80043	icAdaBipu31	Adalia bipunctata
T>A	CTT	C[T>A]T	16.8812	icAdaBipu31	Adalia bipunctata
T>C	CTA	C[T>C]A	24.2934	icAdaBipu31	Adalia bipunctata
T>C	CTC	C[T>C]C	17.6986	icAdaBipu31	Adalia bipunctata
T>C	CTG	C[T>C]G	22.4262	icAdaBipu31	Adalia bipunctata
T>C	CTT	C[T>C]T	40.0928	icAdaBipu31	Adalia bipunctata
T>G	CTA	C[T>G]A	0.971736	icAdaBipu31	Adalia bipunctata
T>G	CTC	C[T>G]C	9.31504	icAdaBipu31	Adalia bipunctata
T>G	CTG	C[T>G]G	5.85032	icAdaBipu31	Adalia bipunctata
T>G	CTT	C[T>G]T	13.716	icAdaBipu31	Adalia bipunctata
C>A	GCA	G[C>A]A	16.5041	icAdaBipu31	Adalia bipunctata
C>A	GCC	G[C>A]C	7.47019	icAdaBipu31	Adalia bipunctata
C>A	GCG	G[C>A]G	7.48005	icAdaBipu31	Adalia bipunctata
C>A	GCT	G[C>A]T	19.4961	icAdaBipu31	Adalia bipunctata
C>G	GCA	G[C>G]A	5.50135	icAdaBipu31	Adalia bipunctata
C>G	GCC	G[C>G]C	5.33585	icAdaBipu31	Adalia bipunctata
C>G	GCG	G[C>G]G	3.20573	icAdaBipu31	Adalia bipunctata
C>G	GCT	G[C>G]T	4.33246	icAdaBipu31	Adalia bipunctata
C>T	GCA	G[C>T]A	36.3089	icAdaBipu31	Adalia bipunctata
C>T	GCC	G[C>T]C	20.2762	icAdaBipu31	Adalia bipunctata
C>T	GCG	G[C>T]G	12.8229	icAdaBipu31	Adalia bipunctata
C>T	GCT	G[C>T]T	24.9116	icAdaBipu31	Adalia bipunctata
T>A	GTA	G[T>A]A	17.7868	icAdaBipu31	Adalia bipunctata
T>A	GTC	G[T>A]C	6.60309	icAdaBipu31	Adalia bipunctata
T>A	GTG	G[T>A]G	9.03425	icAdaBipu31	Adalia bipunctata
T>A	GTT	G[T>A]T	12.2835	icAdaBipu31	Adalia bipunctata
T>C	GTA	G[T>C]A	18.7749	icAdaBipu31	Adalia bipunctata
T>C	GTC	G[T>C]C	16.9794	icAdaBipu31	Adalia bipunctata
T>C	GTG	G[T>C]G	12.0457	icAdaBipu31	Adalia bipunctata
T>C	GTT	G[T>C]T	19.4489	icAdaBipu31	Adalia bipunctata
T>G	GTA	G[T>G]A	5.92892	icAdaBipu31	Adalia bipunctata
T>G	GTC	G[T>G]C	0.943298	icAdaBipu31	Adalia bipunctata
T>G	GTG	G[T>G]G	7.02664	icAdaBipu31	Adalia bipunctata
T>G	GTT	G[T>G]T	18.4253	icAdaBipu31	Adalia bipunctata
C>A	TCA	T[C>A]A	46.2841	icAdaBipu31	Adalia bipunctata
C>A	TCC	T[C>A]C	8.42838	icAdaBipu31	Adalia bipunctata
C>A	TCG	T[C>A]G	19.9116	icAdaBipu31	Adalia bipunctata
C>A	TCT	T[C>A]T	31.3369	icAdaBipu31	Adalia bipunctata
C>G	TCA	T[C>G]A	11.3139	icAdaBipu31	Adalia bipunctata
C>G	TCC	T[C>G]C	2.1071	icAdaBipu31	Adalia bipunctata
C>G	TCG	T[C>G]G	8.9602	icAdaBipu31	Adalia bipunctata
C>G	TCT	T[C>G]T	10.8058	icAdaBipu31	Adalia bipunctata
C>T	TCA	T[C>T]A	96.6823	icAdaBipu31	Adalia bipunctata
C>T	TCC	T[C>T]C	46.3561	icAdaBipu31	Adalia bipunctata
C>T	TCG	T[C>T]G	40.8187	icAdaBipu31	Adalia bipunctata
C>T	TCT	T[C>T]T	63.7544	icAdaBipu31	Adalia bipunctata
T>A	TTA	T[T>A]A	37.5779	icAdaBipu31	Adalia bipunctata
T>A	TTC	T[T>A]C	13.8911	icAdaBipu31	Adalia bipunctata
T>A	TTG	T[T>A]G	7.95578	icAdaBipu31	Adalia bipunctata
T>A	TTT	T[T>A]T	27.5861	icAdaBipu31	Adalia bipunctata
T>C	TTA	T[T>C]A	83.067	icAdaBipu31	Adalia bipunctata
T>C	TTC	T[T>C]C	44.65	icAdaBipu31	Adalia bipunctata
T>C	TTG	T[T>C]G	44.7513	icAdaBipu31	Adalia bipunctata
T>C	TTT	T[T>C]T	64.0709	icAdaBipu31	Adalia bipunctata
T>G	TTA	T[T>G]A	17.8001	icAdaBipu31	Adalia bipunctata
T>G	TTC	T[T>G]C	12.8989	icAdaBipu31	Adalia bipunctata
T>G	TTG	T[T>G]G	20.8839	icAdaBipu31	Adalia bipunctata
T>G	TTT	T[T>G]T	21.357	icAdaBipu31	Adalia bipunctata
C>A	ACA	A[C>A]A	45.6713	icAdaBipu32	Adalia bipunctata
C>A	ACC	A[C>A]C	17.9643	icAdaBipu32	Adalia bipunctata
C>A	ACG	A[C>A]G	12.4776	icAdaBipu32	Adalia bipunctata
C>A	ACT	A[C>A]T	21.9875	icAdaBipu32	Adalia bipunctata
C>G	ACA	A[C>G]A	8.91148	icAdaBipu32	Adalia bipunctata
C>G	ACC	A[C>G]C	1.05672	icAdaBipu32	Adalia bipunctata
C>G	ACG	A[C>G]G	10.2089	icAdaBipu32	Adalia bipunctata
C>G	ACT	A[C>G]T	7.69562	icAdaBipu32	Adalia bipunctata
C>T	ACA	A[C>T]A	54.5828	icAdaBipu32	Adalia bipunctata
C>T	ACC	A[C>T]C	20.0777	icAdaBipu32	Adalia bipunctata
C>T	ACG	A[C>T]G	31.7611	icAdaBipu32	Adalia bipunctata
C>T	ACT	A[C>T]T	47.2731	icAdaBipu32	Adalia bipunctata
T>A	ATA	A[T>A]A	52.9661	icAdaBipu32	Adalia bipunctata
T>A	ATC	A[T>A]C	13.4897	icAdaBipu32	Adalia bipunctata
T>A	ATG	A[T>A]G	15.1081	icAdaBipu32	Adalia bipunctata
T>A	ATT	A[T>A]T	52.7394	icAdaBipu32	Adalia bipunctata
T>C	ATA	A[T>C]A	47.9693	icAdaBipu32	Adalia bipunctata
T>C	ATC	A[T>C]C	16.3803	icAdaBipu32	Adalia bipunctata
T>C	ATG	A[T>C]G	19.1369	icAdaBipu32	Adalia bipunctata
T>C	ATT	A[T>C]T	30.2763	icAdaBipu32	Adalia bipunctata
T>G	ATA	A[T>G]A	15.9898	icAdaBipu32	Adalia bipunctata
T>G	ATC	A[T>G]C	3.85419	icAdaBipu32	Adalia bipunctata
T>G	ATG	A[T>G]G	10.0721	icAdaBipu32	Adalia bipunctata
T>G	ATT	A[T>G]T	10.7432	icAdaBipu32	Adalia bipunctata
C>A	CCA	C[C>A]A	37.0633	icAdaBipu32	Adalia bipunctata
C>A	CCC	C[C>A]C	5.28709	icAdaBipu32	Adalia bipunctata
C>A	CCG	C[C>A]G	9.01753	icAdaBipu32	Adalia bipunctata
C>A	CCT	C[C>A]T	4.30184	icAdaBipu32	Adalia bipunctata
C>G	CCA	C[C>G]A	7.41267	icAdaBipu32	Adalia bipunctata
C>G	CCC	C[C>G]C	3.52473	icAdaBipu32	Adalia bipunctata
C>G	CCG	C[C>G]G	17.0331	icAdaBipu32	Adalia bipunctata
C>G	CCT	C[C>G]T	5.3773	icAdaBipu32	Adalia bipunctata
C>T	CCA	C[C>T]A	30.7096	icAdaBipu32	Adalia bipunctata
C>T	CCC	C[C>T]C	39.6532	icAdaBipu32	Adalia bipunctata
C>T	CCG	C[C>T]G	19.037	icAdaBipu32	Adalia bipunctata
C>T	CCT	C[C>T]T	35.4902	icAdaBipu32	Adalia bipunctata
T>A	CTA	C[T>A]A	20.417	icAdaBipu32	Adalia bipunctata
T>A	CTC	C[T>A]C	8.36538	icAdaBipu32	Adalia bipunctata
T>A	CTG	C[T>A]G	12.6209	icAdaBipu32	Adalia bipunctata
T>A	CTT	C[T>A]T	13.5806	icAdaBipu32	Adalia bipunctata
T>C	CTA	C[T>C]A	24.306	icAdaBipu32	Adalia bipunctata
T>C	CTC	C[T>C]C	15.8013	icAdaBipu32	Adalia bipunctata
T>C	CTG	C[T>C]G	16.5043	icAdaBipu32	Adalia bipunctata
T>C	CTT	C[T>C]T	48.0544	icAdaBipu32	Adalia bipunctata
T>G	CTA	C[T>G]A	4.86119	icAdaBipu32	Adalia bipunctata
T>G	CTC	C[T>G]C	6.50641	icAdaBipu32	Adalia bipunctata
T>G	CTG	C[T>G]G	9.70842	icAdaBipu32	Adalia bipunctata
T>G	CTT	C[T>G]T	9.40195	icAdaBipu32	Adalia bipunctata
C>A	GCA	G[C>A]A	16.9108	icAdaBipu32	Adalia bipunctata
C>A	GCC	G[C>A]C	9.57439	icAdaBipu32	Adalia bipunctata
C>A	GCG	G[C>A]G	8.90385	icAdaBipu32	Adalia bipunctata
C>A	GCT	G[C>A]T	12.1974	icAdaBipu32	Adalia bipunctata
C>G	GCA	G[C>G]A	6.76433	icAdaBipu32	Adalia bipunctata
C>G	GCC	G[C>G]C	9.57439	icAdaBipu32	Adalia bipunctata
C>G	GCG	G[C>G]G	6.67789	icAdaBipu32	Adalia bipunctata
C>G	GCT	G[C>G]T	2.21772	icAdaBipu32	Adalia bipunctata
C>T	GCA	G[C>T]A	19.1656	icAdaBipu32	Adalia bipunctata
C>T	GCC	G[C>T]C	23.4041	icAdaBipu32	Adalia bipunctata
C>T	GCG	G[C>T]G	10.0168	icAdaBipu32	Adalia bipunctata
C>T	GCT	G[C>T]T	27.7214	icAdaBipu32	Adalia bipunctata
T>A	GTA	G[T>A]A	22.75	icAdaBipu32	Adalia bipunctata
T>A	GTC	G[T>A]C	7.53451	icAdaBipu32	Adalia bipunctata
T>A	GTG	G[T>A]G	11.0867	icAdaBipu32	Adalia bipunctata
T>A	GTT	G[T>A]T	12.0852	icAdaBipu32	Adalia bipunctata
T>C	GTA	G[T>C]A	26.7065	icAdaBipu32	Adalia bipunctata
T>C	GTC	G[T>C]C	22.6035	icAdaBipu32	Adalia bipunctata
T>C	GTG	G[T>C]G	11.0867	icAdaBipu32	Adalia bipunctata
T>C	GTT	G[T>C]T	25.1775	icAdaBipu32	Adalia bipunctata
T>G	GTA	G[T>G]A	3.95652	icAdaBipu32	Adalia bipunctata
T>G	GTC	G[T>G]C	4.70907	icAdaBipu32	Adalia bipunctata
T>G	GTG	G[T>G]G	9.0709	icAdaBipu32	Adalia bipunctata
T>G	GTT	G[T>G]T	17.1207	icAdaBipu32	Adalia bipunctata
C>A	TCA	T[C>A]A	40.9349	icAdaBipu32	Adalia bipunctata
C>A	TCC	T[C>A]C	13.5263	icAdaBipu32	Adalia bipunctata
C>A	TCG	T[C>A]G	10.2336	icAdaBipu32	Adalia bipunctata
C>A	TCT	T[C>A]T	39.7168	icAdaBipu32	Adalia bipunctata
C>G	TCA	T[C>G]A	13.645	icAdaBipu32	Adalia bipunctata
C>G	TCC	T[C>G]C	11.4453	icAdaBipu32	Adalia bipunctata
C>G	TCG	T[C>G]G	10.2336	icAdaBipu32	Adalia bipunctata
C>G	TCT	T[C>G]T	8.82596	icAdaBipu32	Adalia bipunctata
C>T	TCA	T[C>T]A	86.0683	icAdaBipu32	Adalia bipunctata
C>T	TCC	T[C>T]C	63.4694	icAdaBipu32	Adalia bipunctata
C>T	TCG	T[C>T]G	48.0978	icAdaBipu32	Adalia bipunctata
C>T	TCT	T[C>T]T	51.8525	icAdaBipu32	Adalia bipunctata
T>A	TTA	T[T>A]A	51.0129	icAdaBipu32	Adalia bipunctata
T>A	TTC	T[T>A]C	17.5941	icAdaBipu32	Adalia bipunctata
T>A	TTG	T[T>A]G	15.7205	icAdaBipu32	Adalia bipunctata
T>A	TTT	T[T>A]T	28.1702	icAdaBipu32	Adalia bipunctata
T>C	TTA	T[T>C]A	73.5762	icAdaBipu32	Adalia bipunctata
T>C	TTC	T[T>C]C	49.8499	icAdaBipu32	Adalia bipunctata
T>C	TTG	T[T>C]G	29.4759	icAdaBipu32	Adalia bipunctata
T>C	TTT	T[T>C]T	65.1435	icAdaBipu32	Adalia bipunctata
T>G	TTA	T[T>G]A	21.5824	icAdaBipu32	Adalia bipunctata
T>G	TTC	T[T>G]C	4.88725	icAdaBipu32	Adalia bipunctata
T>G	TTG	T[T>G]G	23.5807	icAdaBipu32	Adalia bipunctata
T>G	TTT	T[T>G]T	17.6064	icAdaBipu32	Adalia bipunctata
C>A	ACA	A[C>A]A	39.1882	icAdaBipu33	Adalia bipunctata
C>A	ACC	A[C>A]C	17.8146	icAdaBipu33	Adalia bipunctata
C>A	ACG	A[C>A]G	15.2249	icAdaBipu33	Adalia bipunctata
C>A	ACT	A[C>A]T	25.8228	icAdaBipu33	Adalia bipunctata
C>G	ACA	A[C>G]A	22.8598	icAdaBipu33	Adalia bipunctata
C>G	ACC	A[C>G]C	4.19167	icAdaBipu33	Adalia bipunctata
C>G	ACG	A[C>G]G	8.69992	icAdaBipu33	Adalia bipunctata
C>G	ACT	A[C>G]T	8.60761	icAdaBipu33	Adalia bipunctata
C>T	ACA	A[C>T]A	62.048	icAdaBipu33	Adalia bipunctata
C>T	ACC	A[C>T]C	26.1979	icAdaBipu33	Adalia bipunctata
C>T	ACG	A[C>T]G	27.1873	icAdaBipu33	Adalia bipunctata
C>T	ACT	A[C>T]T	46.2659	icAdaBipu33	Adalia bipunctata
T>A	ATA	A[T>A]A	66.0501	icAdaBipu33	Adalia bipunctata
T>A	ATC	A[T>A]C	18.4746	icAdaBipu33	Adalia bipunctata
T>A	ATG	A[T>A]G	26.2681	icAdaBipu33	Adalia bipunctata
T>A	ATT	A[T>A]T	74.7805	icAdaBipu33	Adalia bipunctata
T>C	ATA	A[T>C]A	60.0455	icAdaBipu33	Adalia bipunctata
T>C	ATC	A[T>C]C	23.3363	icAdaBipu33	Adalia bipunctata
T>C	ATG	A[T>C]G	29.299	icAdaBipu33	Adalia bipunctata
T>C	ATT	A[T>C]T	35.8946	icAdaBipu33	Adalia bipunctata
T>G	ATA	A[T>G]A	26.0197	icAdaBipu33	Adalia bipunctata
T>G	ATC	A[T>G]C	15.5575	icAdaBipu33	Adalia bipunctata
T>G	ATG	A[T>G]G	11.1134	icAdaBipu33	Adalia bipunctata
T>G	ATT	A[T>G]T	19.9415	icAdaBipu33	Adalia bipunctata
C>A	CCA	C[C>A]A	26.2478	icAdaBipu33	Adalia bipunctata
C>A	CCC	C[C>A]C	10.5506	icAdaBipu33	Adalia bipunctata
C>A	CCG	C[C>A]G	10.9486	icAdaBipu33	Adalia bipunctata
C>A	CCT	C[C>A]T	14.9156	icAdaBipu33	Adalia bipunctata
C>G	CCA	C[C>G]A	13.6488	icAdaBipu33	Adalia bipunctata
C>G	CCC	C[C>G]C	4.39607	icAdaBipu33	Adalia bipunctata
C>G	CCG	C[C>G]G	9.95331	icAdaBipu33	Adalia bipunctata
C>G	CCT	C[C>G]T	3.19621	icAdaBipu33	Adalia bipunctata
C>T	CCA	C[C>T]A	44.0963	icAdaBipu33	Adalia bipunctata
C>T	CCC	C[C>T]C	36.0478	icAdaBipu33	Adalia bipunctata
C>T	CCG	C[C>T]G	15.9253	icAdaBipu33	Adalia bipunctata
C>T	CCT	C[C>T]T	33.0275	icAdaBipu33	Adalia bipunctata
T>A	CTA	C[T>A]A	18.4758	icAdaBipu33	Adalia bipunctata
T>A	CTC	C[T>A]C	12.2236	icAdaBipu33	Adalia bipunctata
T>A	CTG	C[T>A]G	17.6416	icAdaBipu33	Adalia bipunctata
T>A	CTT	C[T>A]T	19.8199	icAdaBipu33	Adalia bipunctata
T>C	CTA	C[T>C]A	36.9516	icAdaBipu33	Adalia bipunctata
T>C	CTC	C[T>C]C	26.3278	icAdaBipu33	Adalia bipunctata
T>C	CTG	C[T>C]G	11.7611	icAdaBipu33	Adalia bipunctata
T>C	CTT	C[T>C]T	42.7693	icAdaBipu33	Adalia bipunctata
T>G	CTA	C[T>G]A	10.6965	icAdaBipu33	Adalia bipunctata
T>G	CTC	C[T>G]C	9.40279	icAdaBipu33	Adalia bipunctata
T>G	CTG	C[T>G]G	14.7014	icAdaBipu33	Adalia bipunctata
T>G	CTT	C[T>G]T	18.7768	icAdaBipu33	Adalia bipunctata
C>A	GCA	G[C>A]A	17.4739	icAdaBipu33	Adalia bipunctata
C>A	GCC	G[C>A]C	2.08871	icAdaBipu33	Adalia bipunctata
C>A	GCG	G[C>A]G	15.8995	icAdaBipu33	Adalia bipunctata
C>A	GCT	G[C>A]T	14.0226	icAdaBipu33	Adalia bipunctata
C>G	GCA	G[C>G]A	4.36846	icAdaBipu33	Adalia bipunctata
C>G	GCC	G[C>G]C	6.26613	icAdaBipu33	Adalia bipunctata
C>G	GCG	G[C>G]G	0	icAdaBipu33	Adalia bipunctata
C>G	GCT	G[C>G]T	6.47199	icAdaBipu33	Adalia bipunctata
C>T	GCA	G[C>T]A	22.9344	icAdaBipu33	Adalia bipunctata
C>T	GCC	G[C>T]C	31.3307	icAdaBipu33	Adalia bipunctata
C>T	GCG	G[C>T]G	24.3793	icAdaBipu33	Adalia bipunctata
C>T	GCT	G[C>T]T	24.8093	icAdaBipu33	Adalia bipunctata
T>A	GTA	G[T>A]A	18.75	icAdaBipu33	Adalia bipunctata
T>A	GTC	G[T>A]C	6.63696	icAdaBipu33	Adalia bipunctata
T>A	GTG	G[T>A]G	11.0098	icAdaBipu33	Adalia bipunctata
T>A	GTT	G[T>A]T	15.1829	icAdaBipu33	Adalia bipunctata
T>C	GTA	G[T>C]A	15.7895	icAdaBipu33	Adalia bipunctata
T>C	GTC	G[T>C]C	24.6516	icAdaBipu33	Adalia bipunctata
T>C	GTG	G[T>C]G	17.0152	icAdaBipu33	Adalia bipunctata
T>C	GTT	G[T>C]T	28.3415	icAdaBipu33	Adalia bipunctata
T>G	GTA	G[T>G]A	15.7895	icAdaBipu33	Adalia bipunctata
T>G	GTC	G[T>G]C	6.63696	icAdaBipu33	Adalia bipunctata
T>G	GTG	G[T>G]G	15.0134	icAdaBipu33	Adalia bipunctata
T>G	GTT	G[T>G]T	16.1951	icAdaBipu33	Adalia bipunctata
C>A	TCA	T[C>A]A	48.7621	icAdaBipu33	Adalia bipunctata
C>A	TCC	T[C>A]C	29.9827	icAdaBipu33	Adalia bipunctata
C>A	TCG	T[C>A]G	25.0698	icAdaBipu33	Adalia bipunctata
C>A	TCT	T[C>A]T	48.5297	icAdaBipu33	Adalia bipunctata
C>G	TCA	T[C>G]A	11.4124	icAdaBipu33	Adalia bipunctata
C>G	TCC	T[C>G]C	8.2711	icAdaBipu33	Adalia bipunctata
C>G	TCG	T[C>G]G	13.0363	icAdaBipu33	Adalia bipunctata
C>G	TCT	T[C>G]T	15.0981	icAdaBipu33	Adalia bipunctata
C>T	TCA	T[C>T]A	82.9994	icAdaBipu33	Adalia bipunctata
C>T	TCC	T[C>T]C	69.2704	icAdaBipu33	Adalia bipunctata
C>T	TCG	T[C>T]G	33.0921	icAdaBipu33	Adalia bipunctata
C>T	TCT	T[C>T]T	64.7062	icAdaBipu33	Adalia bipunctata
T>A	TTA	T[T>A]A	68.4612	icAdaBipu33	Adalia bipunctata
T>A	TTC	T[T>A]C	17.812	icAdaBipu33	Adalia bipunctata
T>A	TTG	T[T>A]G	20.7819	icAdaBipu33	Adalia bipunctata
T>A	TTT	T[T>A]T	34.2033	icAdaBipu33	Adalia bipunctata
T>C	TTA	T[T>C]A	108.149	icAdaBipu33	Adalia bipunctata
T>C	TTC	T[T>C]C	62.342	icAdaBipu33	Adalia bipunctata
T>C	TTG	T[T>C]G	60.3664	icAdaBipu33	Adalia bipunctata
T>C	TTT	T[T>C]T	81.9078	icAdaBipu33	Adalia bipunctata
T>G	TTA	T[T>G]A	21.8282	icAdaBipu33	Adalia bipunctata
T>G	TTC	T[T>G]C	11.8747	icAdaBipu33	Adalia bipunctata
T>G	TTG	T[T>G]G	24.7403	icAdaBipu33	Adalia bipunctata
T>G	TTT	T[T>G]T	38.7037	icAdaBipu33	Adalia bipunctata
C>A	ACA	A[C>A]A	14.8105	icAdaBipu34	Adalia bipunctata
C>A	ACC	A[C>A]C	7.42231	icAdaBipu34	Adalia bipunctata
C>A	ACG	A[C>A]G	10.7648	icAdaBipu34	Adalia bipunctata
C>A	ACT	A[C>A]T	13.4765	icAdaBipu34	Adalia bipunctata
C>G	ACA	A[C>G]A	6.34737	icAdaBipu34	Adalia bipunctata
[truncated: 5,180 more rows]

## Sheet: Table 9
Supplementary Table 9. Phorcus lineatus samples' age and mutation burden
[truncated: 12 more rows]

[truncated: 11 more sheets: Table 10, Table 11, Table 12, Table 13, Table 14, Table 15, Table 16, Table 17, Table 18, Table 19, Table 20]
